# Supplementary material for: Saltgrass genomes reveal unique features of a dioecious, perennial, halophytic grass
Source: Research Square preprint supplement (doi:10.21203/rs.3.rs-4844604/v1), 2024-08-23
Supplement: Supplementary file 1 [file 7d23aec39dae8cd7a5215398.pdf]

## SUPPLEMENTARY FIGURES

Supplementary Figure 1.1

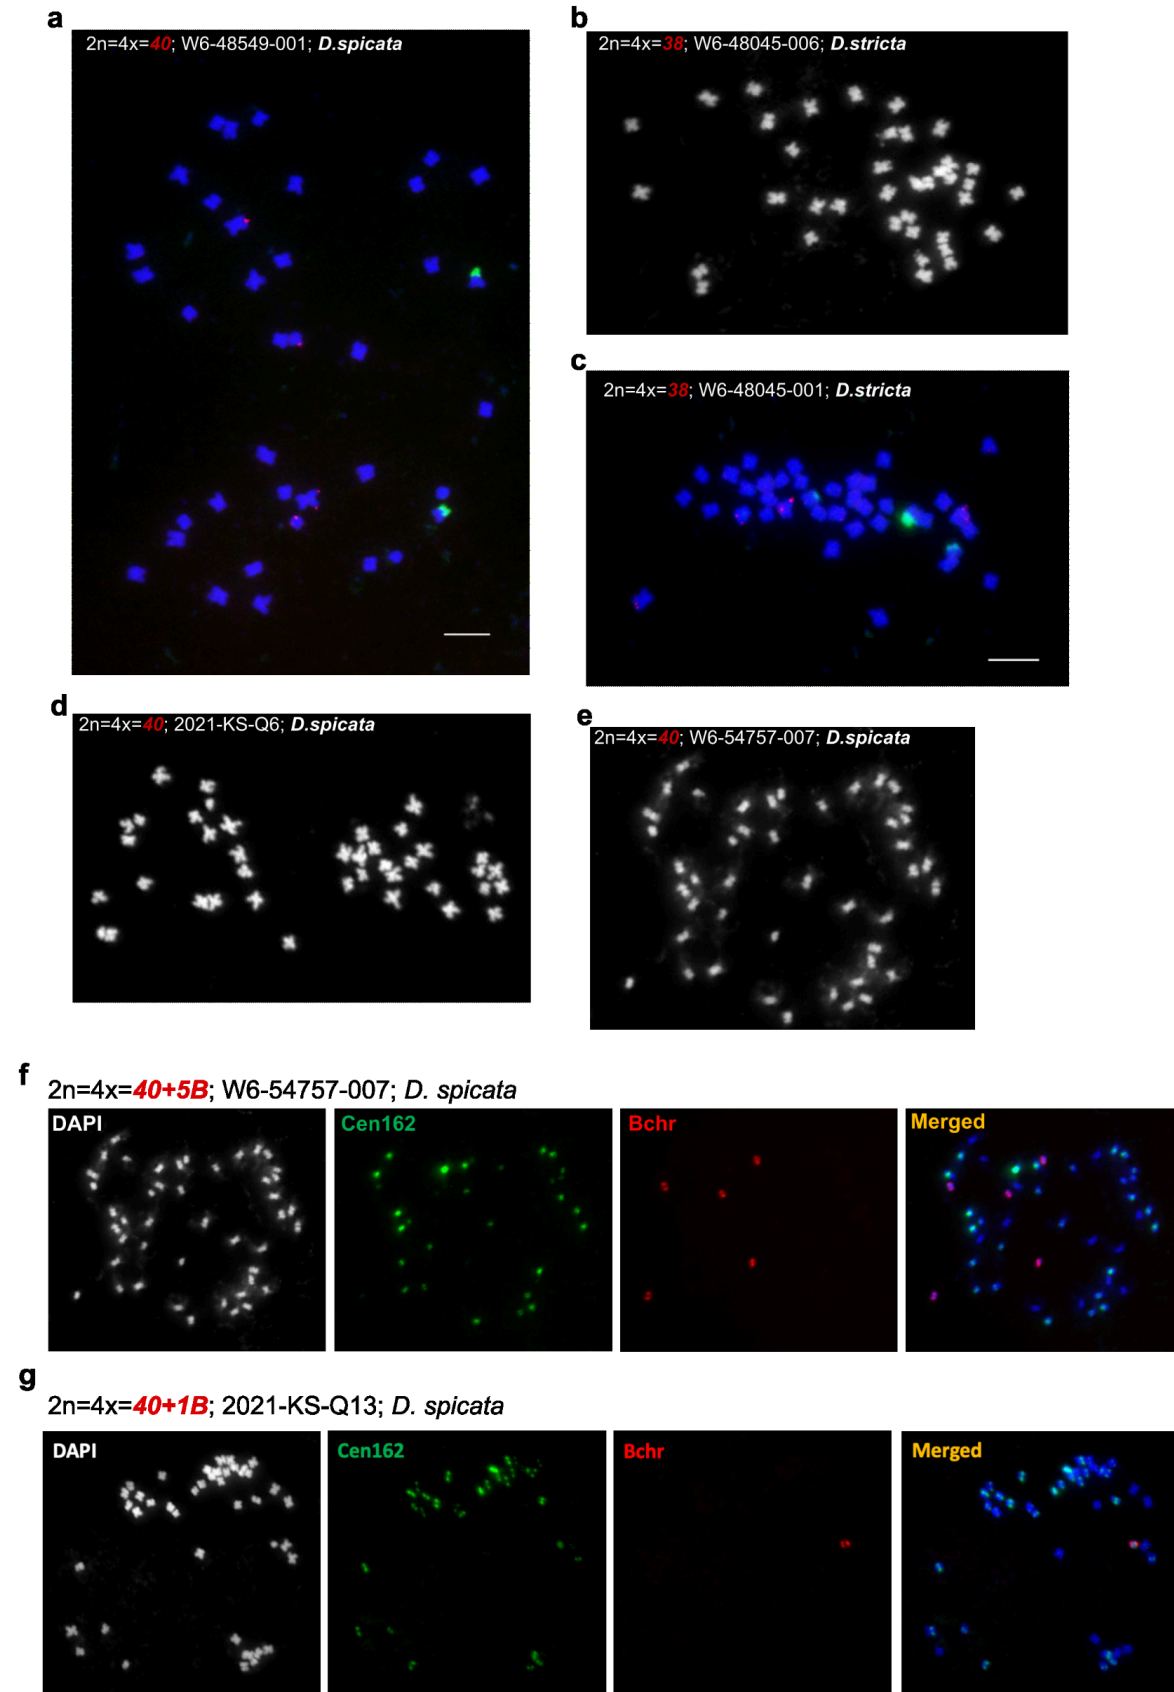

**Supplementary Figure 1.1:** DAPI stained chromosomes from **a**, W6-48549-001;  $2n=4x=40$ ; *D. spicata*, **b**, W6-48045-006;  $2n=4x=38$ ; *D. stricta*, **c**, W6-48045-001;  $2n=4x=38$ ; *D. stricta*, **d**, 2021-KS-Q6;  $2n=4x=40$ ; *D. spicata*, **e**, W6-54757-007;  $2n=4x=40$ ; *D. spicata*, **f**, W6-54757-007;  $2n=4x=40+5B$ ; *D. spicata* and **g**, 2021-KS-Q13;  $2n=4x=40+1B$ ; *D. spicata*. **f** and **g** showing the CEN162 (green) and chromosome B (red) FISH for W6-54757-007 and 2021-KS-Q13, respectively.

Supplementary Figure 1.2

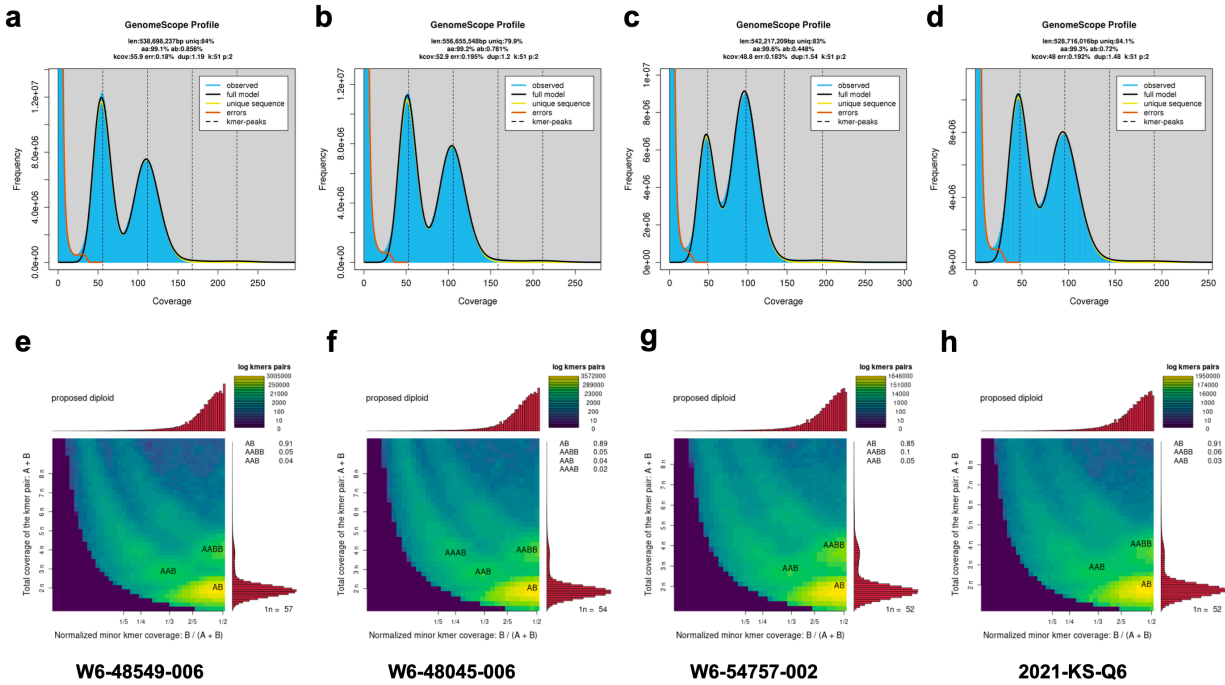

**Supplementary Figure 1.2:** In the initial analysis, k-mer profiles were generated using High-Fidelity (HiFi) reads from W6-48549-006, W6-48045-006, W6-54757-002, and 2021-KS-Q6. All four genomes exhibit a diploid configuration, characterized by a notable level of heterozygosity. Genomescope2 plots (a-d) provided predictive insights into various genomic parameters including genome length, uniqueness, and the percentage of heterozygosity. The Smudgeplot analysis (e-h) provided an assessment of k-mer coverage, represented by the B/(A+B) ratio. The primary peak, highlighted in yellow, indicates the highest k-mer coverage supporting the AB ratio, confirming a diploid structure. Additionally, a smaller secondary peak, representing the AABB ratio, with lower k-mer coverage, suggests the presence of two distinct subgenomes within the analyzed genomes.

Supplementary Figure 1.3

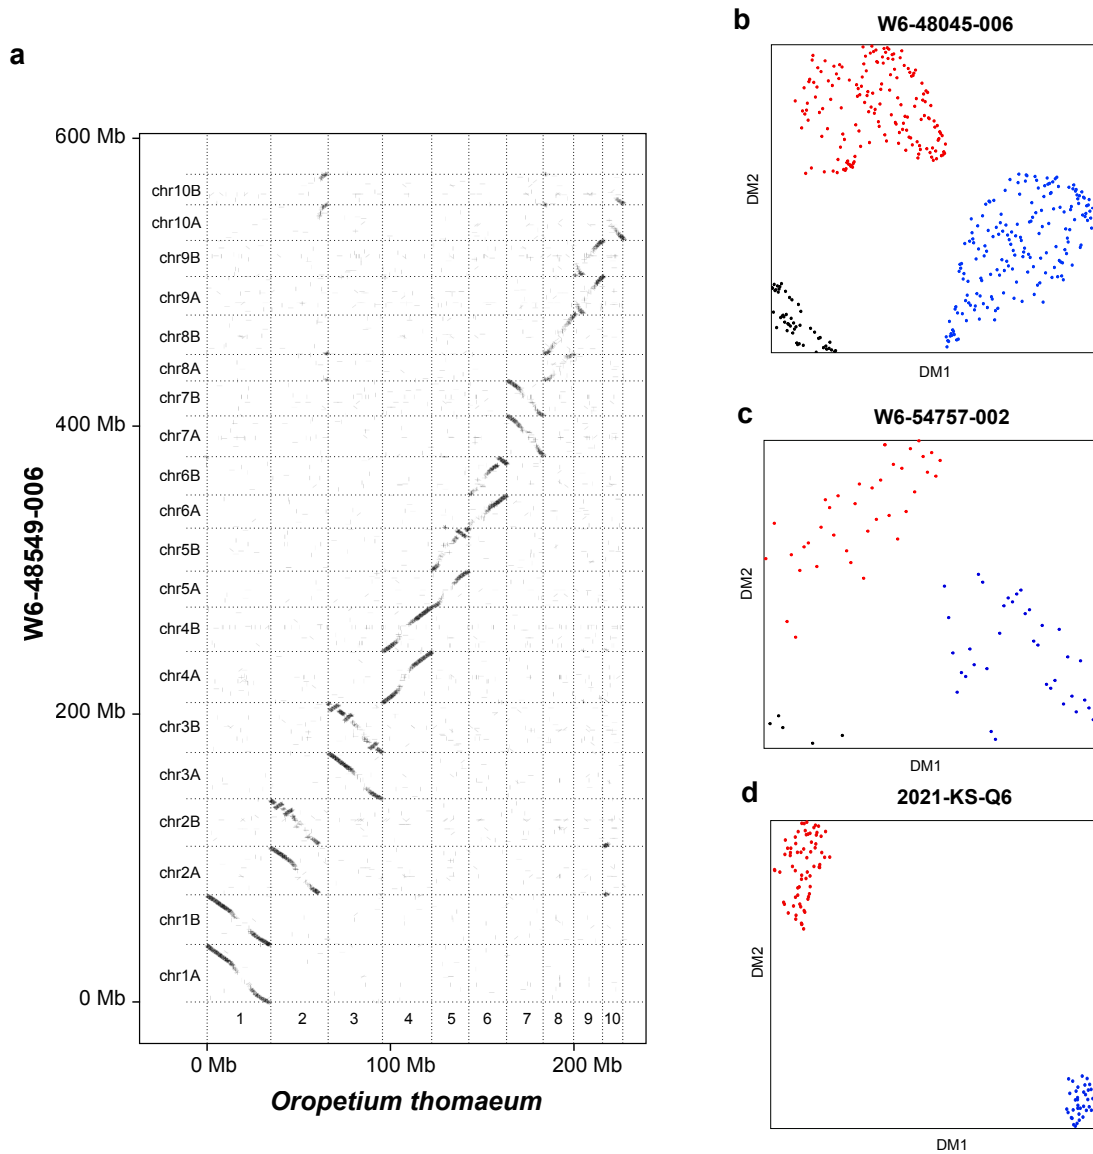

**Supplementary Figure 1.3: a**, Chromosome-level alignments of the final T2T assembly of W6-48549-006 saltgrass genotypes against *Oropetium thomaeum*. The figure illustrates the end-to-end alignment of each chromosome of *O. thomaeum* against two chromosomes of saltgrass, demonstrating its two subgenomes. Subgenome separation is based on TE clustering, showing division into two groups in (b) W6-48045-006 (*D. stricta*), (c) W6-54757-002 (*D. spicata*), and (d) 2021-KS-Q6 (*D. spicata*).



## Supplementary Figure 1.4

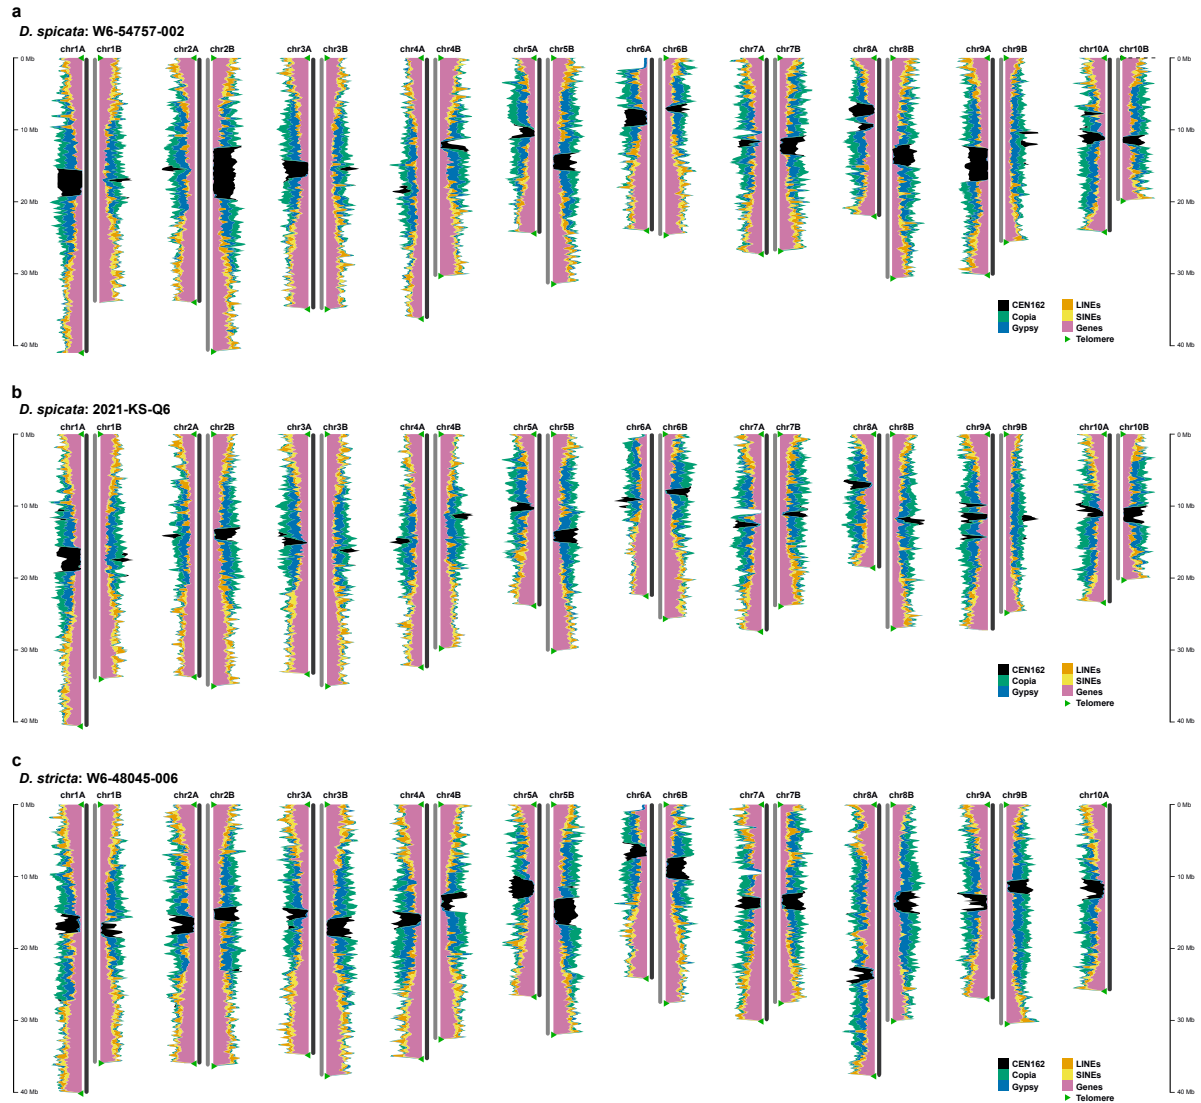

**Supplementary Figure 1.4:** Distribution of telomeres, CEN162, *Copia* and *Gypsy* retrotransposons, LINEs (Long Interspersed Nuclear Elements), SINEs (Short Interspersed Nuclear Elements), and protein-coding genes across each chromosome of *D. spicata*; **a**, W6-54757-002 and **b**, 2021-KS-Q6, and *D. stricta*; **c**, W6-48045-006. This illustration highlights the spatial arrangement of these genetic elements, providing insights into the chromosomal organization and genome structure of saltgrass.

# Supplementary Figure 1.5

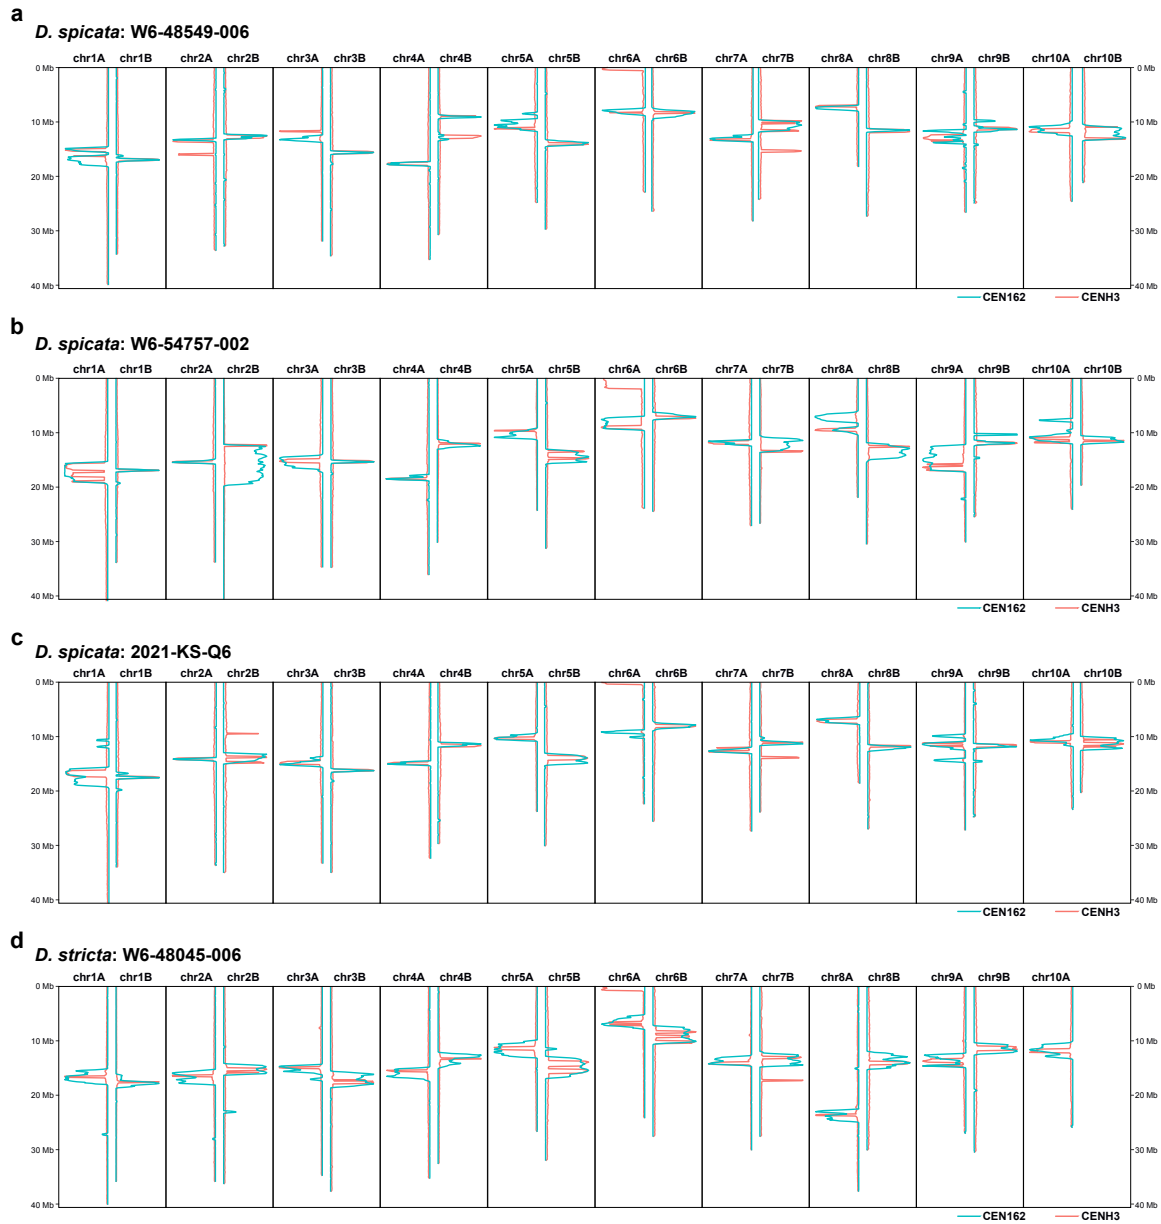

**Supplementary Figure 1.5:** Line plot showing the distribution CEN162 with CENH3 ChIP-seq peaks over each chromosome in *D. spicata*; **a**, W6-54757-002, **b**, W6-54757-002 and **c**, 2021-KS-Q6, and *D. stricta*; **d**, W6-48045-006.

Supplementary Figure 1.6

**a**

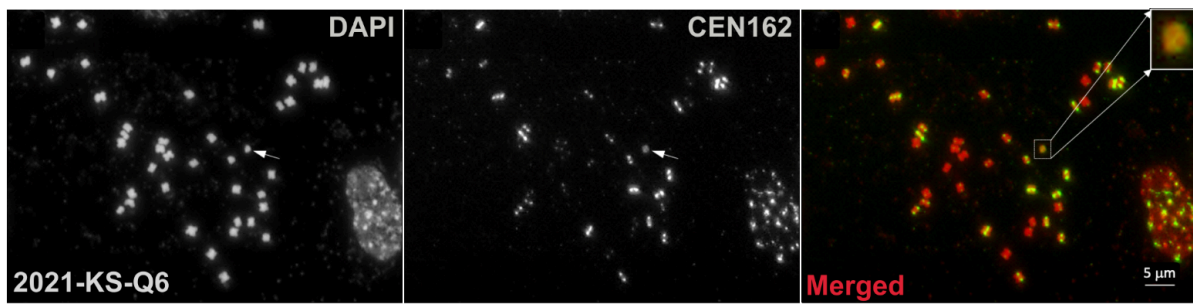

**b**

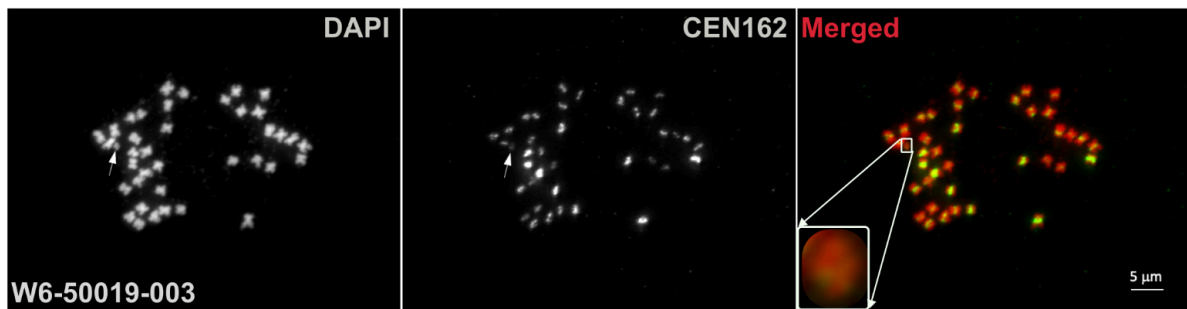

**Supplementary Figure 1.6:** CEN162 probe used for FISH signal in DAPI-stained metaphase chromosomes, showing one B chromosome in each of the following: **a**, 2021-KS-Q6 and **b**, W6-50019-003.

Supplementary Figure 1.7

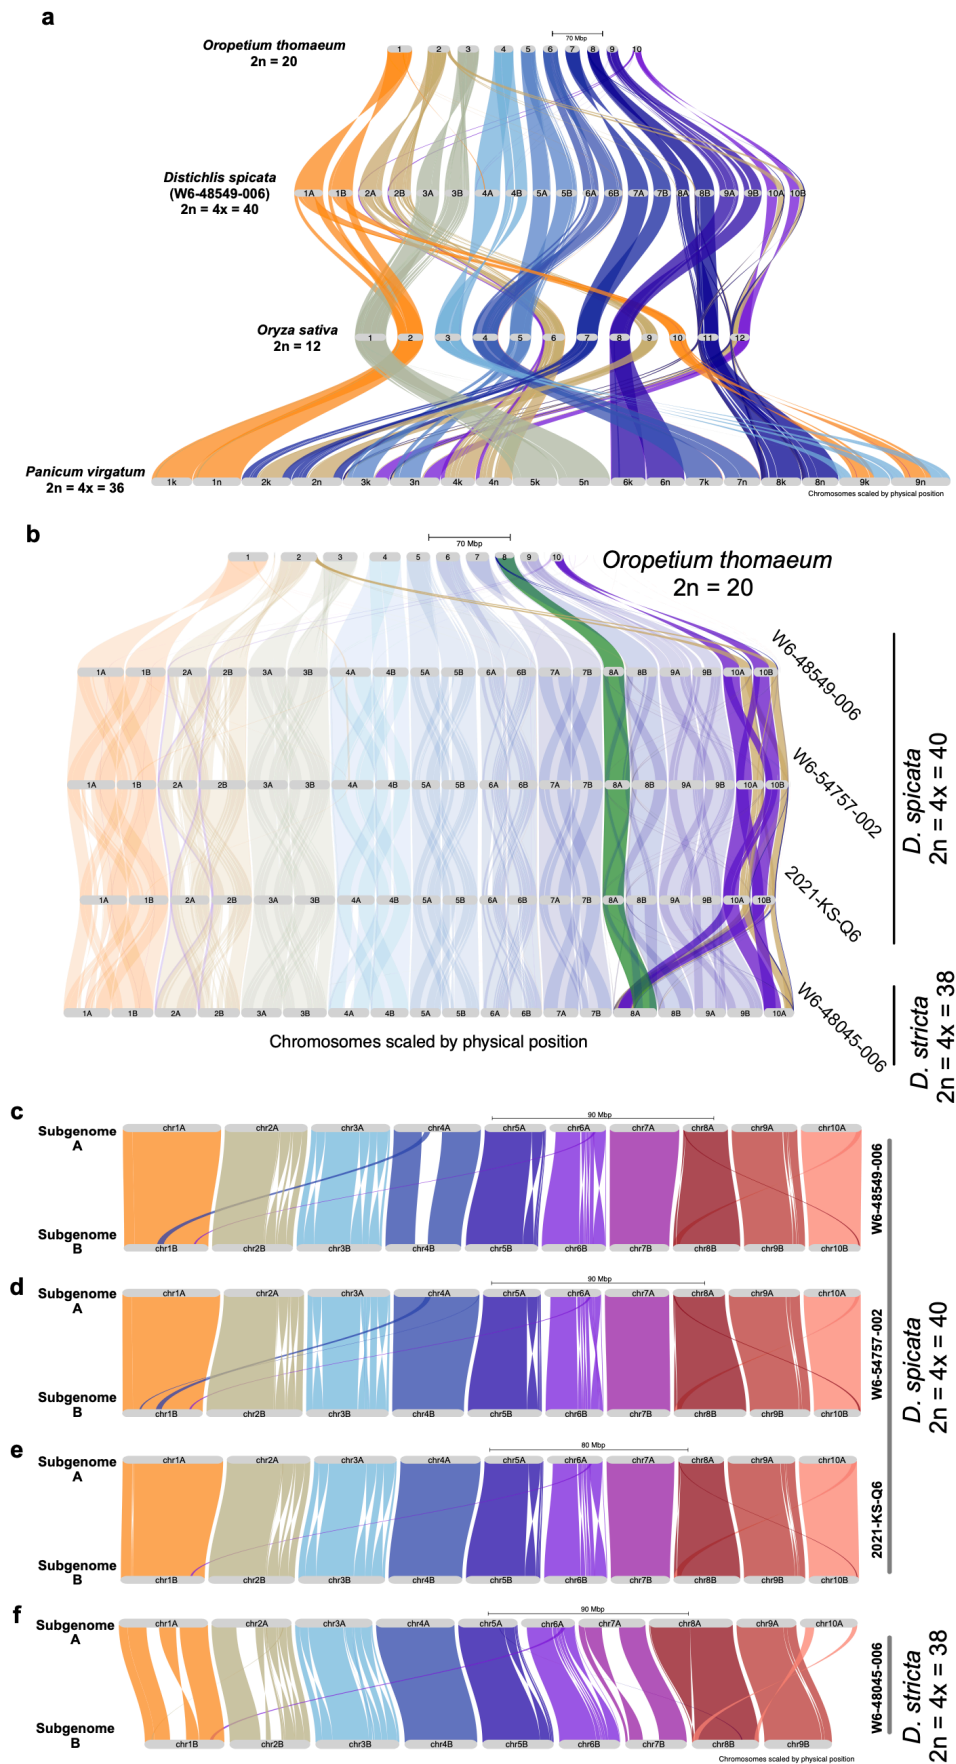

**Supplementary Figure 1.7:** **a**, Synteny plot of all protein-coding genes among *O. thomaeum*; n = 28930, *D. spicata* (W6-48549-006; n = 67007), *Oryza sativa*; n = 42246 and *Panicum virgatum*; n = 129942. **b**, Synteny plot of all protein-coding genes among *O. thomaeum* and three genets of *D. spicata* (W6-48549-006; n = 67007, W6-54757-002; n = 66946 and 2021-KS-Q6; n = 63604) and one genet of *D. stricta* (W6-48045-006; n = 63870). Chromosome fusion has been highlighted between *D. spicata* (2n = 4x = 40) and *D. stricta* (2n = 4x = 38). Synteny plots between subgenomeA and subgenomeB of all protein coding genes in **c**, W6-48549-006, **d**, W6-54757-002, **e**, 2021-KS-Q6 and **f**, W6-48045-006.

Supplementary Figure 1.8

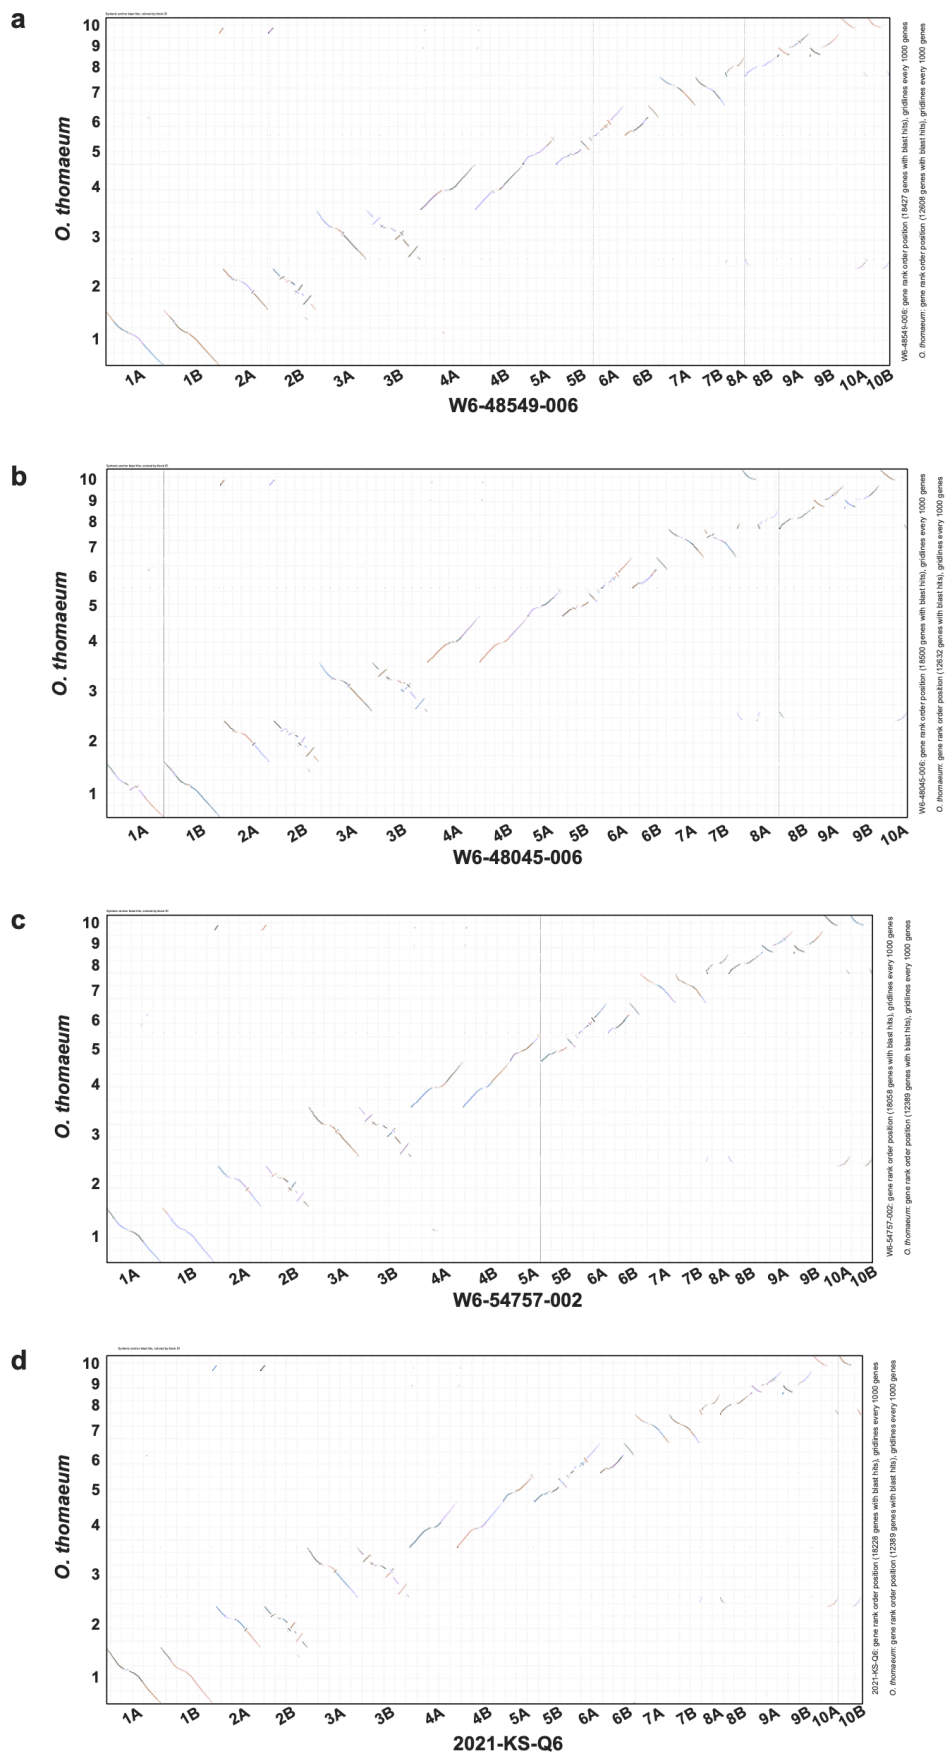

**Supplementary Figure 1.8:** Syntenic alignments (dotplots) of protein-coding genes among *O. thomaeum* against **a**, W6-48549-006, **b**, W6-48045-006, **c**, W6-54757-002 and **d**, 2021-KS-Q6.

Supplementary Figure 1.9

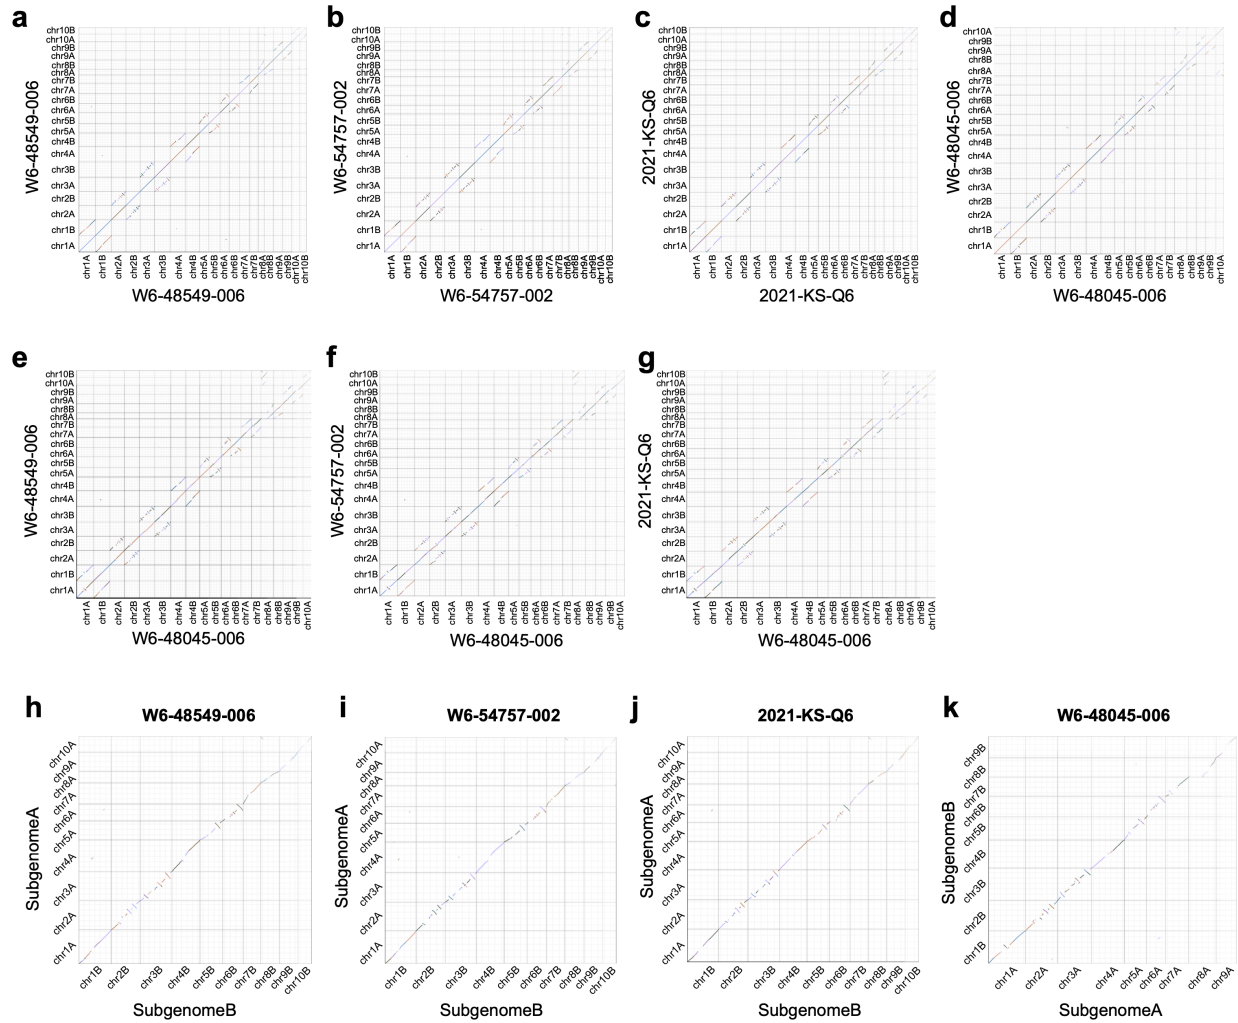

**Supplementary Figure 1.9:** Self syntenic alignments (dotplots) of protein-coding genes among **a**, W6-48549-006, **b**, W6-54757-002, **c**, 2021-KS-Q6 and **d**, W6-48045-006. Dotplots of *D. stricta* (W6-48045-006) vs *D. spicata* (**e**, W6-48549-006, **f**, W6-54757-002 and **g**, 2021-KS-Q6). Dotplots between subgenomeA and subgenomeB of **h**, W6-48549-006, **i**, W6-54757-002, **j**, 2021-KS-Q6 and **k**, W6-48045-006.



Supplementary Figure 1.10

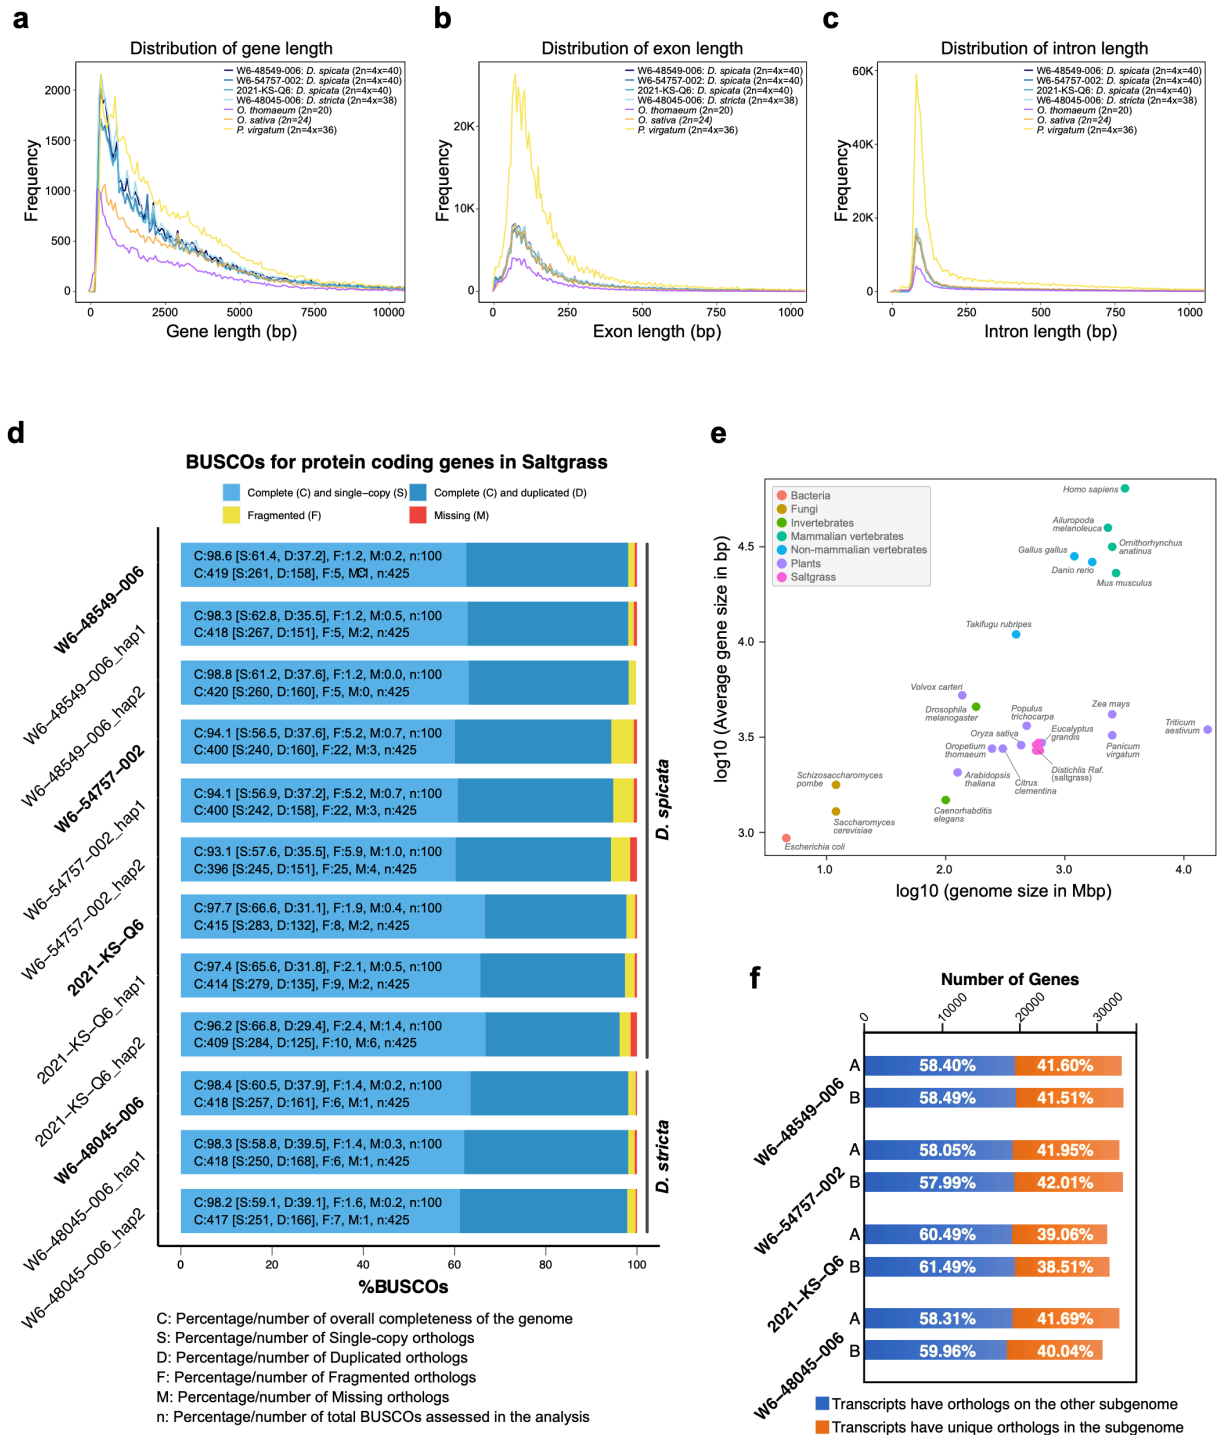

**Supplementary Figure 1.10:** Length distribution and their comparison of all four genets of saltgrass (W6-48549-006, W6-54757-002, 2021-KS-Q6 and W6-48045-006), *O. sativa*, *O. thomaeum* and *P. virgatum* of **a**, genes, **b**, exons and **c**, introns. **d**, BUSCOs for protein-coding genes of all four genets of saltgrass with their two haplotypes. **e**, Genome size vs gene size interpolation of saltgrass and their comparison with other species. **f**, BUSCO categories comparison between subgenomes of all four genets of saltgrass.

Supplementary Figure 1.11

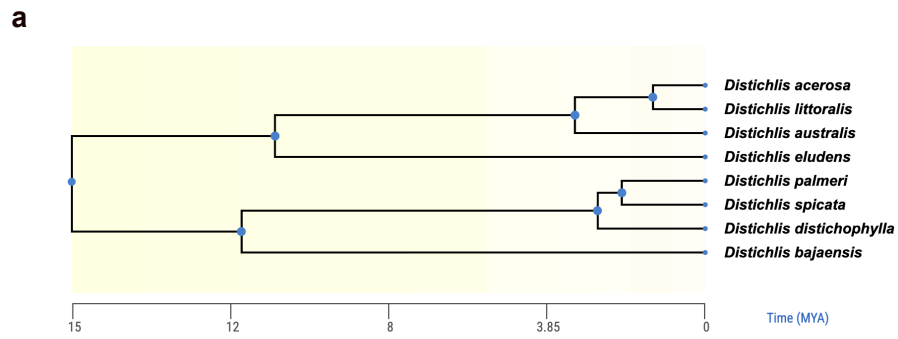

**Supplementary Figure 1.11:** Timetree was built from eight saltgrass species based on their plasmid and mitochondria from <https://timetree.org/> database.

Supplementary Figure 2.1

**a**

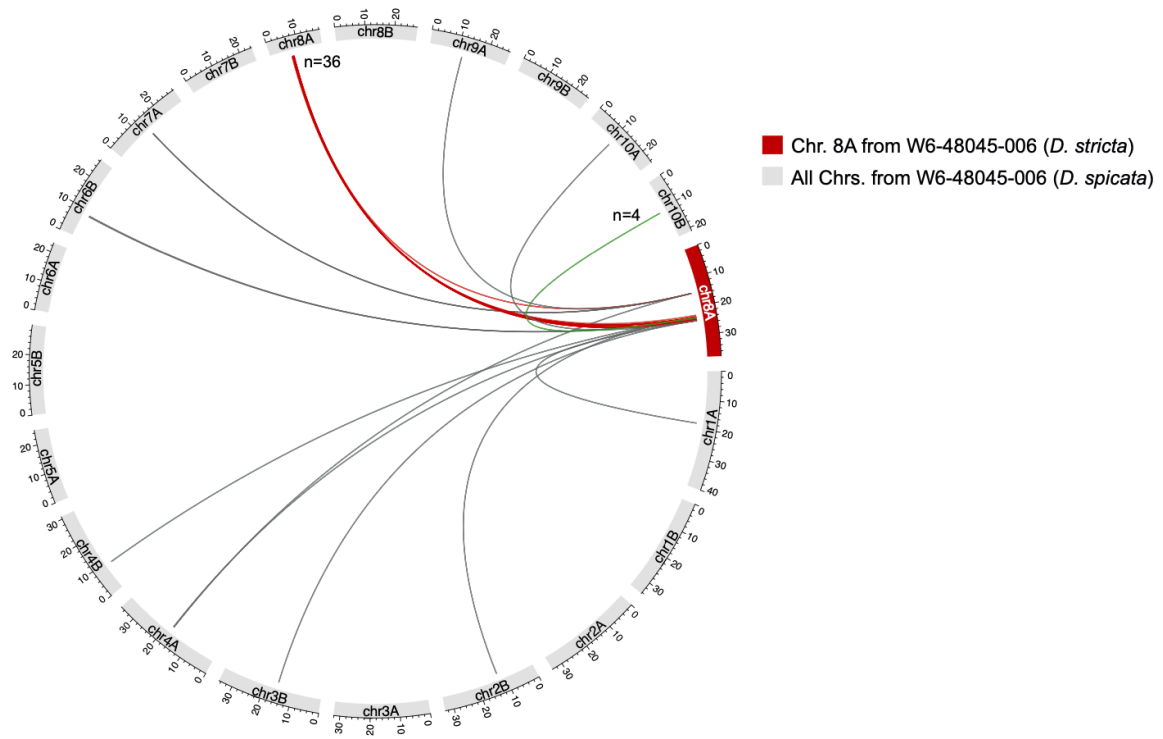

**Supplementary Figure 2.1:** Synteny analysis of CEN162 on the fused Chr. 8A of *D. stricta* shows that the highest amount of CEN162 (represented by 'n') is shared with Chr. 8A, and the second highest amount is shared Chr. 10B of *D. spicata*.

Supplementary Figure 3.1

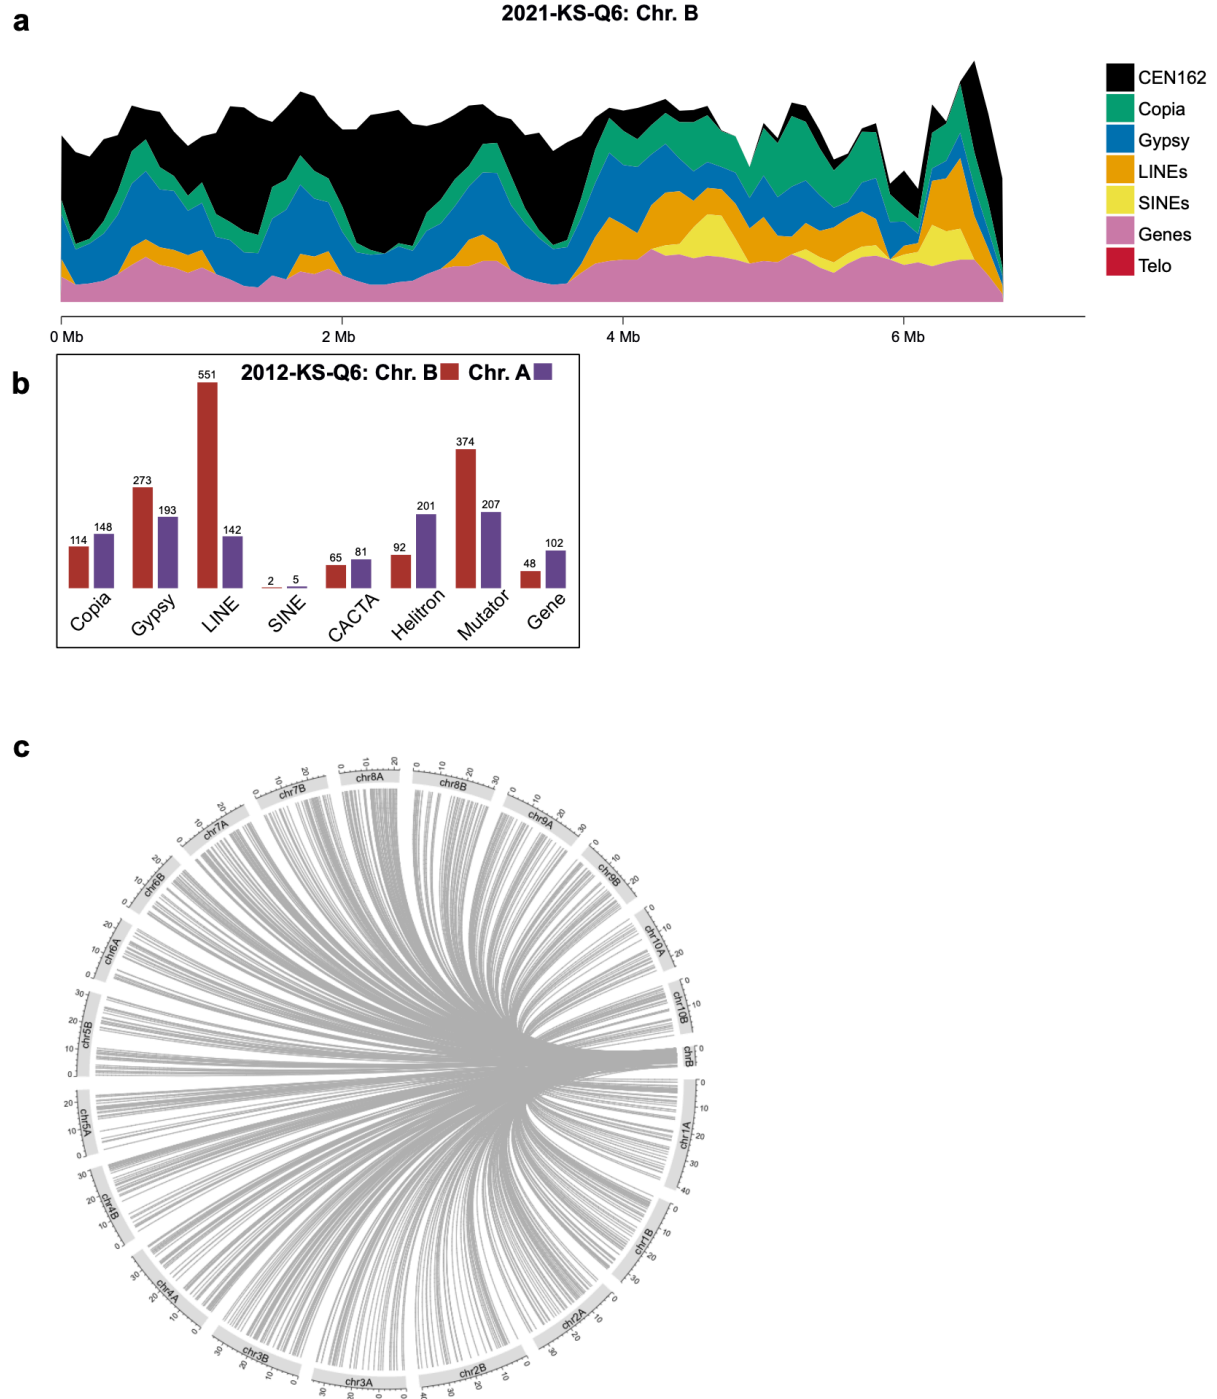

**Supplementary Figure 3.1:** Distribution of different repetitive elements (CEN162, *Copia*, *Gypsy*, LINEs, SINEs), genes and telomere on the B chromosome of 2021-KS-Q6 across 300 Kb bins. **b**, Comparisons of distribution patterns of repetitive elements (*Copia*, *Gypsy*, LINEs, SINEs, CACTA, Helitron, Mutator) and genes between B and A chromosomes (normalized over 1 Mb) in 2021-KS-Q6. **c**, Repeat elements from Chr. B synteny from all Chrs. A in W6-54757-006.

# Supplementary Figure 3.2

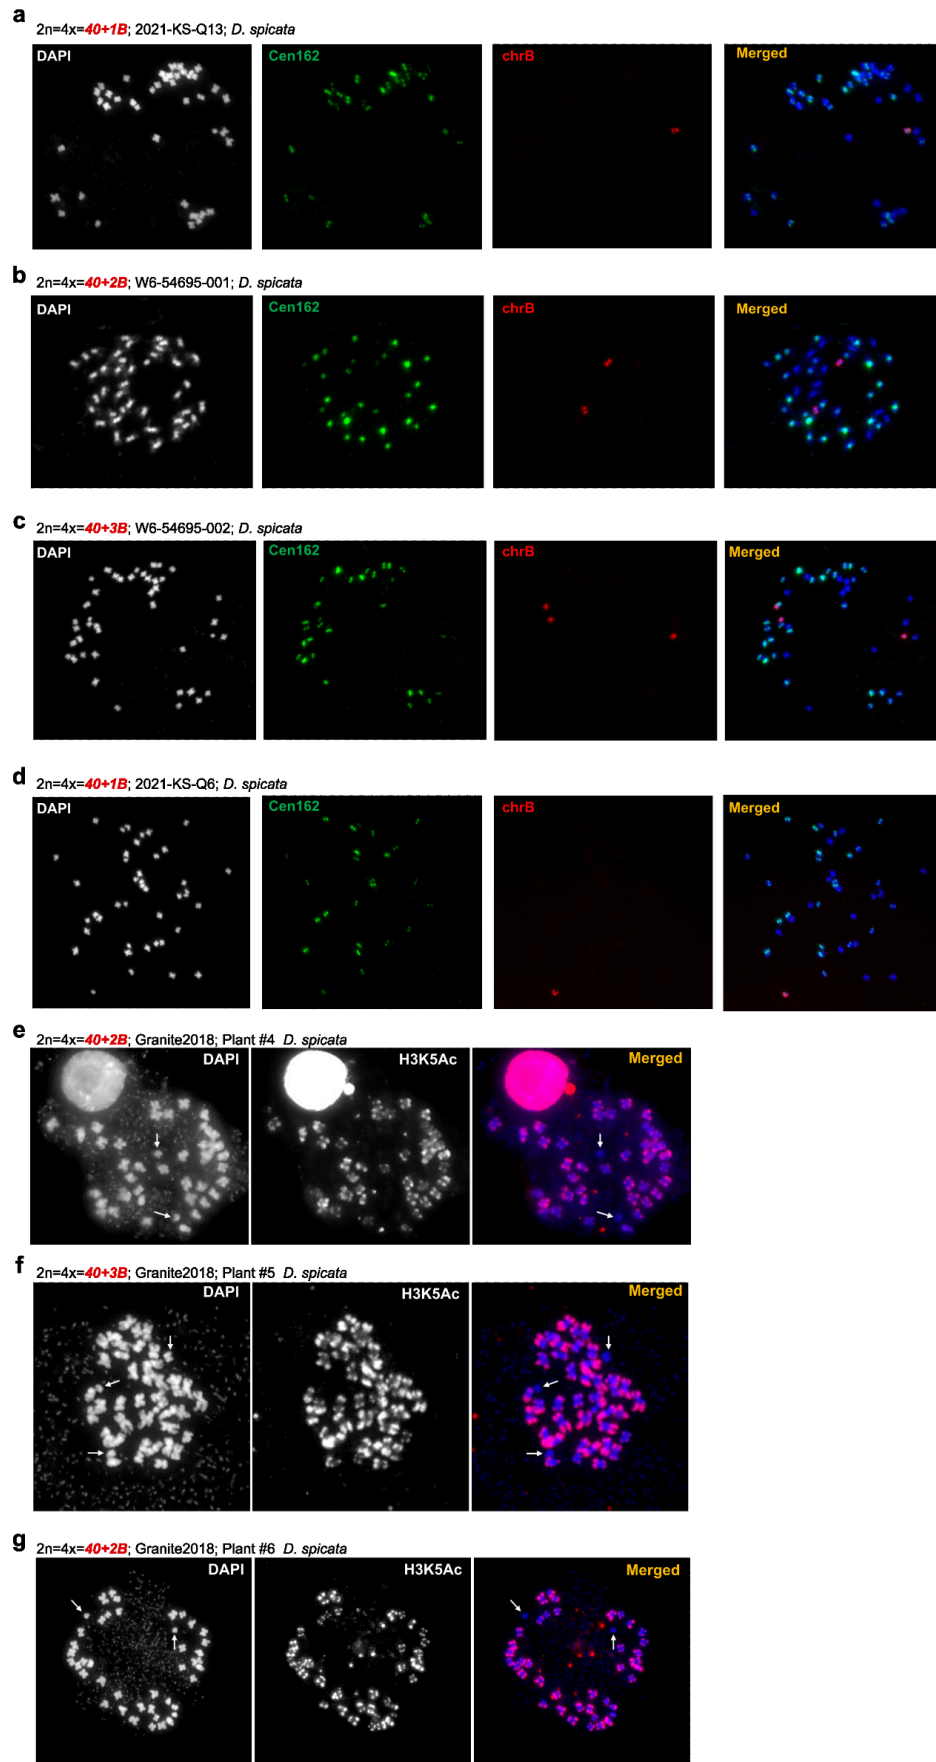

**Supplementary Figure 3.2:** DAPI stain showing one, two, and three B chromosomes were observed in **a**, 2021-KS-Q13; **b**, W6-54695-001; **c**, W6-54695-002; and **d**, 2021-KS-Q6 saltgrass genets, respectively. FISH utilized saltgrass centromere (CEN162) probes depicted in green, while Chr. B probes were shown in red. H3K5Ac ChIP data are illustrated for all A chromosomes but not for the B chromosomes in three plants of the Granite 2018 population, with **(e)** two, **(f)** three, and **(g)** two Chrs. B.

Supplementary Figure 3.3

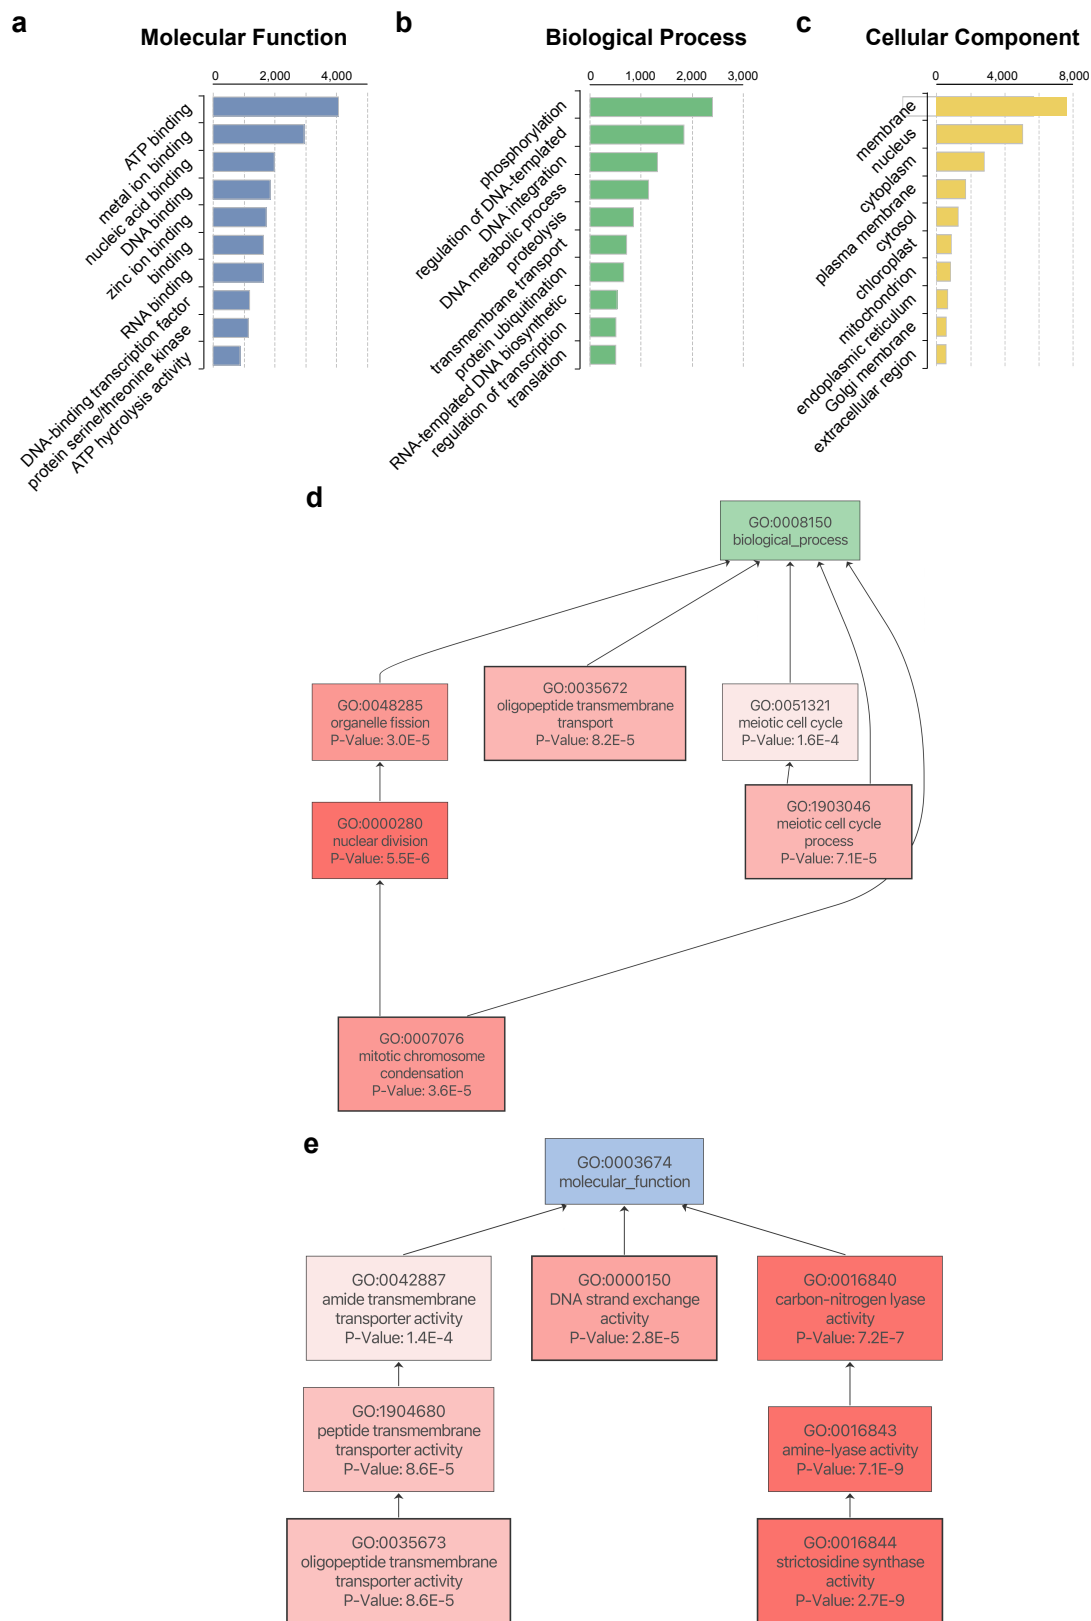

**Supplementary Figure 3.3:** Top 10 counts of **a**, Molecular Function, **b**, Biological Process, and **c**, Cellular Component Gene Ontology (GO) categories are depicted for the protein-coding genes located on

Chromosome B of W6-48549-006. The combined graph illustrates the GO category distribution with corresponding p-values for **d**, Biological Process and **e**, Molecular Function.



Supplementary Figure 4.1

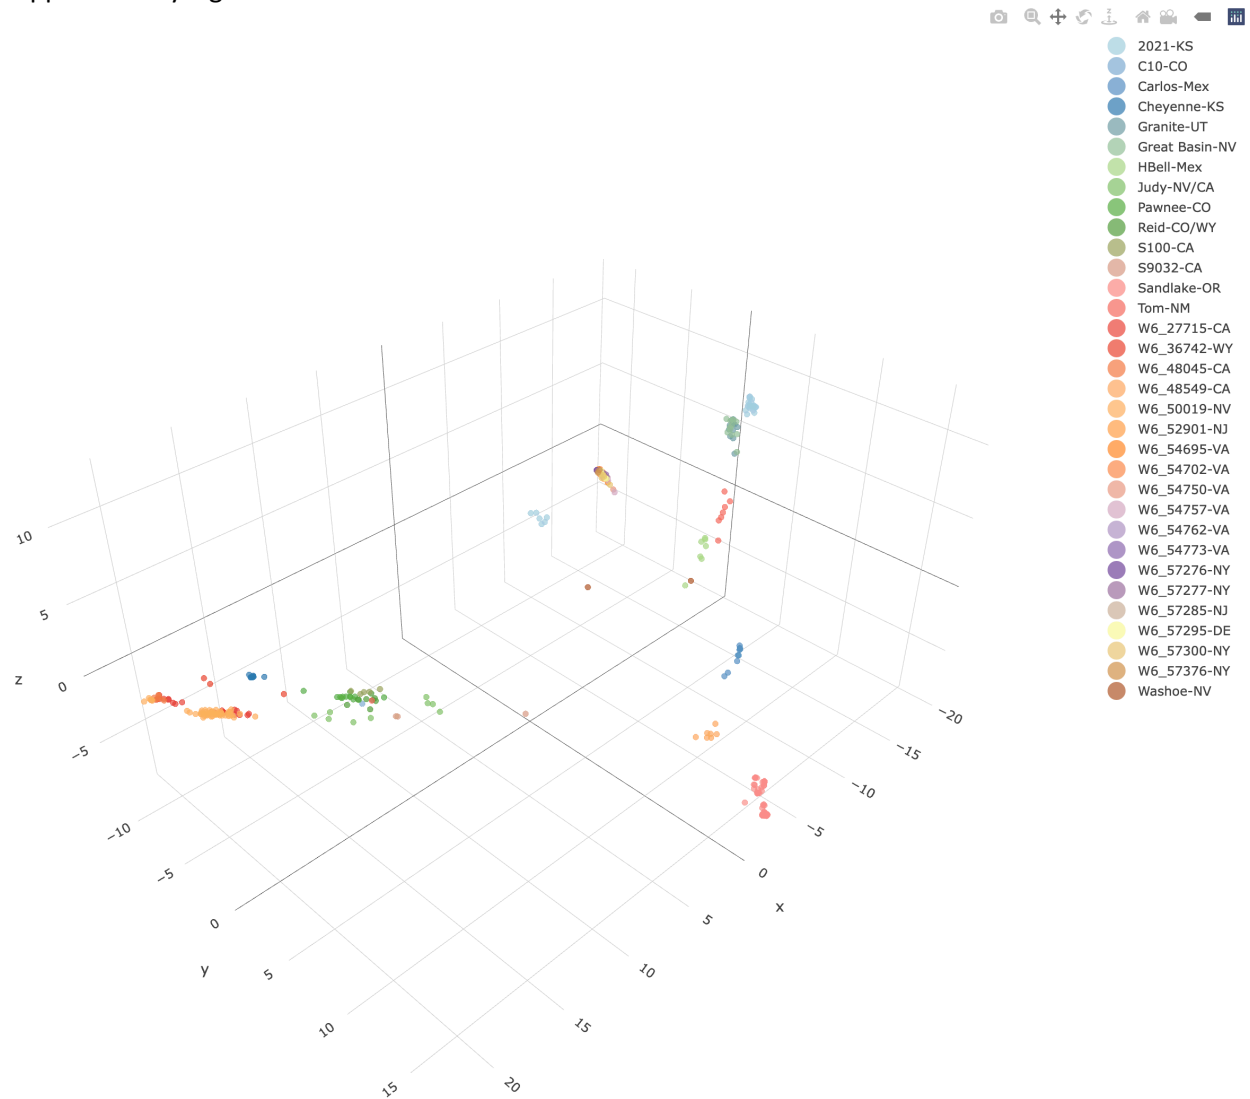

Hyperlink for the interactive 3D PCA plot

<https://kashiff007.github.io/SFig.4.1/>

**Supplementary Figure 4.1:** Three-dimensional PCA plot depicting 364 saltgrass samples, with the first three principal components represented along the x, y, and z axes, respectively

(<https://kashiff007.github.io/SFig.4.1/>).

## Supplementary Figure 4.2

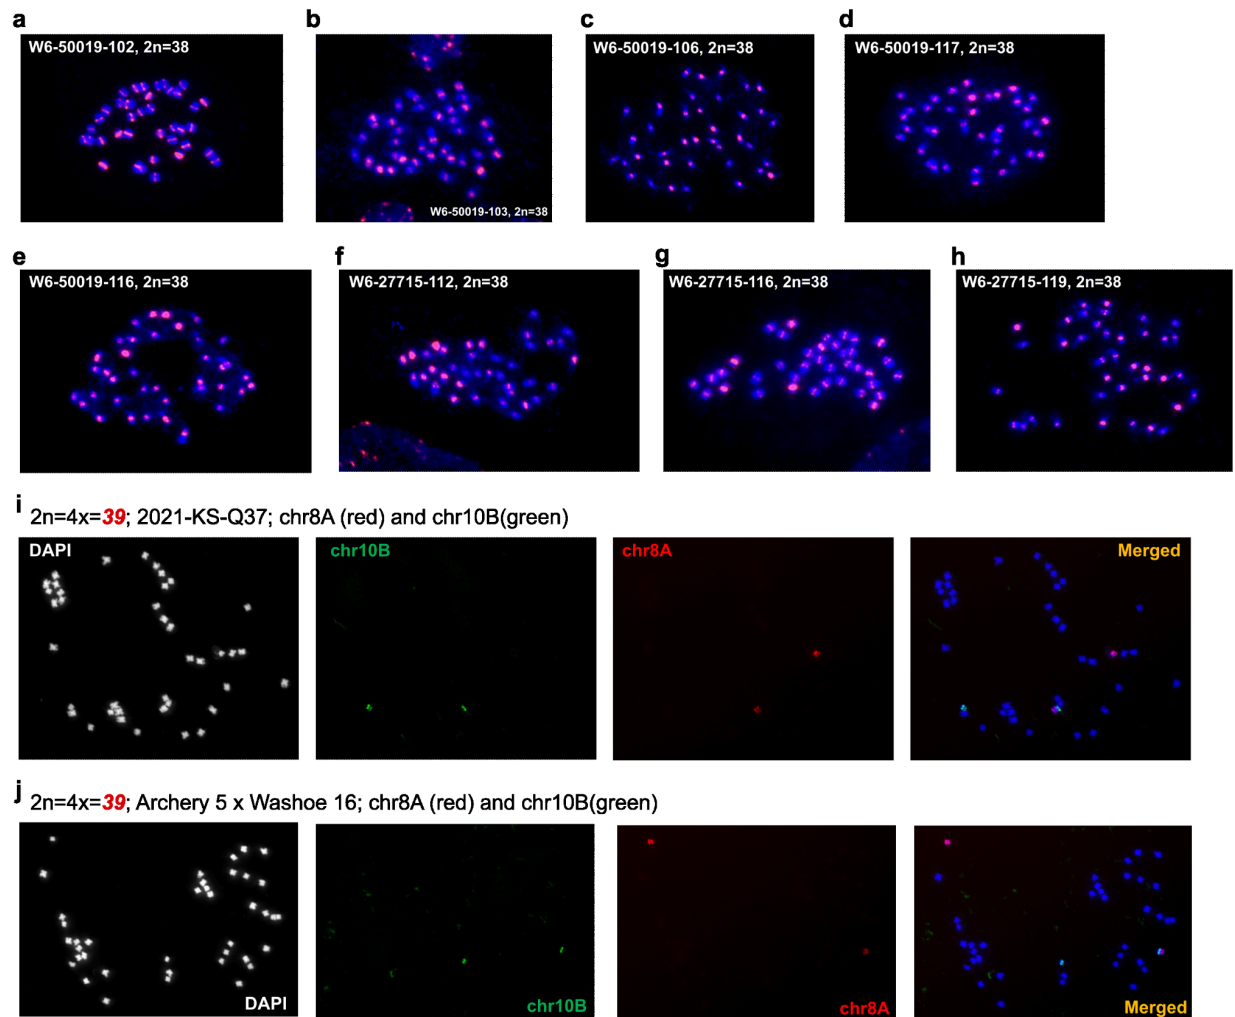

**Supplementary Figure 4.2:** Cytogenetic report featuring CEN162 probe FISH from W6-49549-006 of *D. stricta* (a-h) depicting various hybrid genets: W6-50019-102, W6-50019-103, W6-50019-106, W6-50019-117, W6-50019-116, W6-27715-112, W6-27715-116, and W6-27715-119, all exhibiting a consistent chromosome count of 2n=38. i, Notably, genotype 2021-KS-Q37, with 39 chromosomes, displays an incomplete fusion with Chr. 10B probe FISH labelled in green and Chr. 8A in red, elucidating the hybridization event between *D. spicata* and *D. stricta*. j, Hand-pollinated hybrids between *D. spicata* and *D. stricta* resulted in the hybrid Archery 5 x Washoe 16 (2n=39). Chromosomal analysis using probes specific to Chr. 10B (green) and Chr. 8A (red) confirmed the presence and integration of these chromosomes in the hybrid genome.

Supplementary Figure 4.3

a

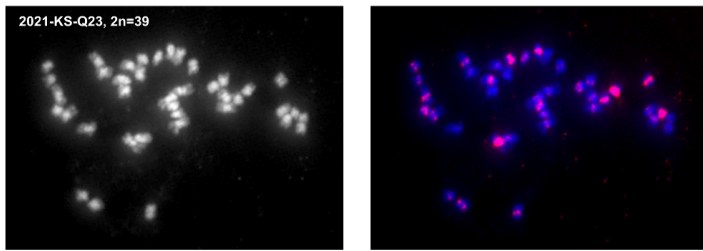

b

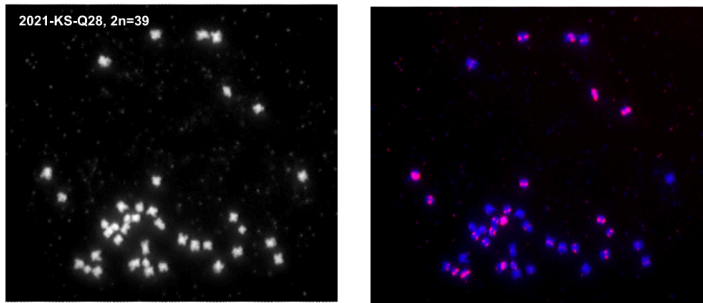

c

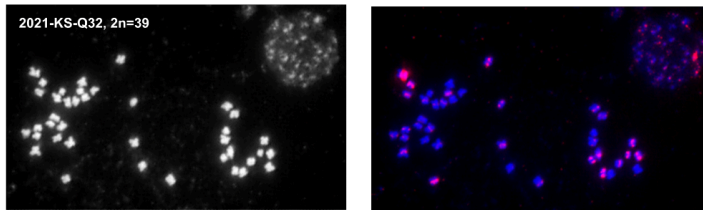

d

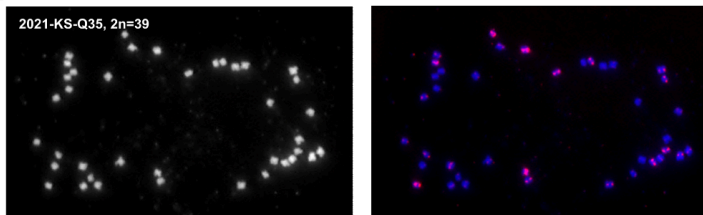

e

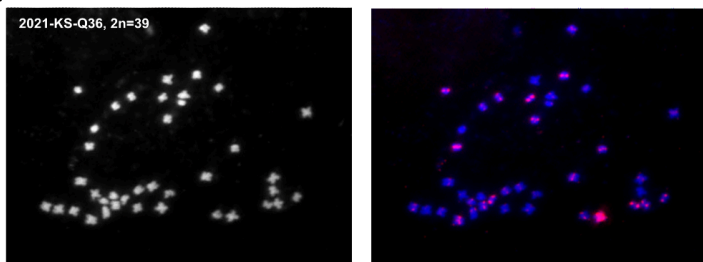

f

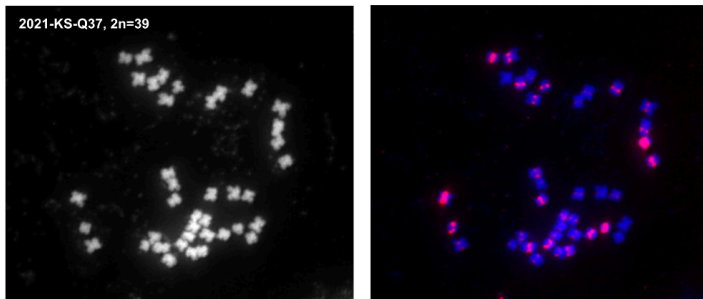

**Supplementary Figure 4.3: a-f:** Cytogenetic analysis depicts six genets from Kansas (2021-KS-Q23, 2021-KS-Q28, 2021-KS-Q32, 2021-KS-Q35, 2021-KS-Q36 and 2021-KS-Q37) exhibiting hybridization between *D. spicata* and *D. stricta* using the CEN162 probe from W6-49549-006, revealing a total of 39 chromosomes in each genet.

Supplementary Figure 5.1

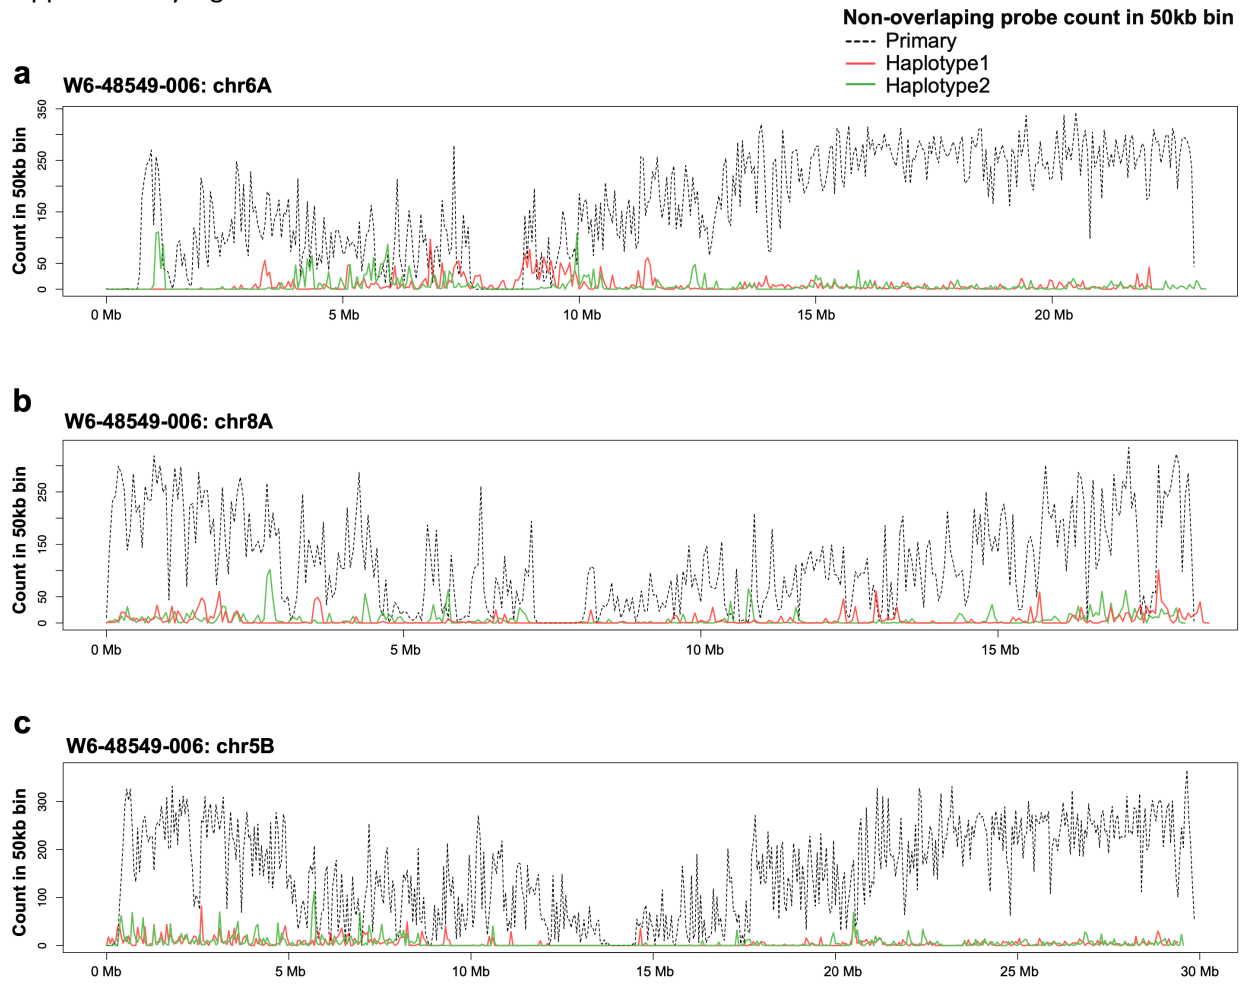

**Supplementary Figure 5.1:** Line plot depicting non-overlapping probe counts derived from the female-specific genomic region across the chromosomes **a**, 6A, **b**, 8A, and **c**, 5B. Each data point represents a 50 Kb bin and is displayed for the primary chromosome (dashed line), haplotype 1 (in red), and haplotype 2 (in green) of the W6-48549-006 genotype.

Supplementary Figure 5.2

**a** SDR (red); W6-48045-006; *D. stricta*

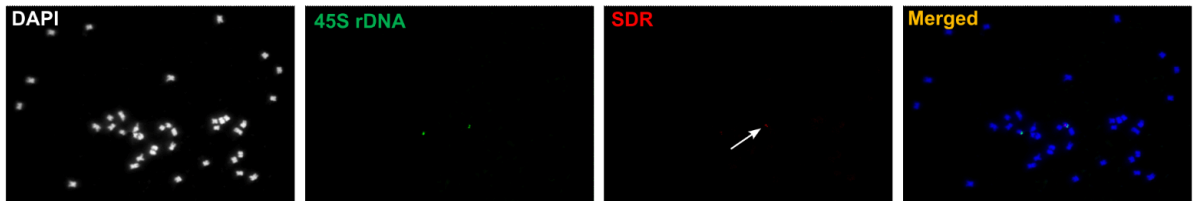

**b** SDR (red); 2021-KS-Q6; *D. spicata*

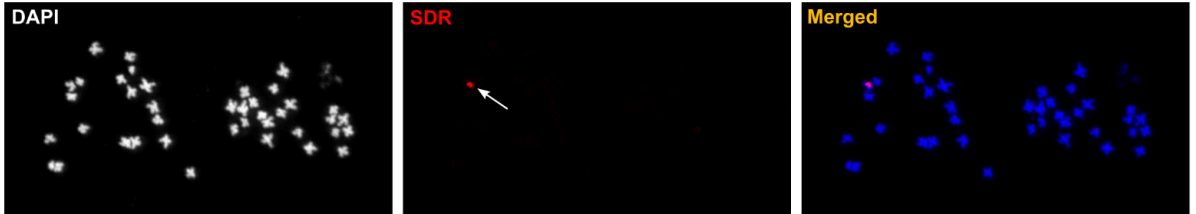

**Supplementary Figure 5.2:** FISH analysis depicting DAPI-stained chromosomes from **a**, *D. stricta* (W6-48045-006) and **b**, *D. spicata* (2021-KS-Q6), highlighting the Sex Determining Region (SDR) in red. The probes utilized are derived from a genomic region specific to females.

Supplementary Figure 5.3

a

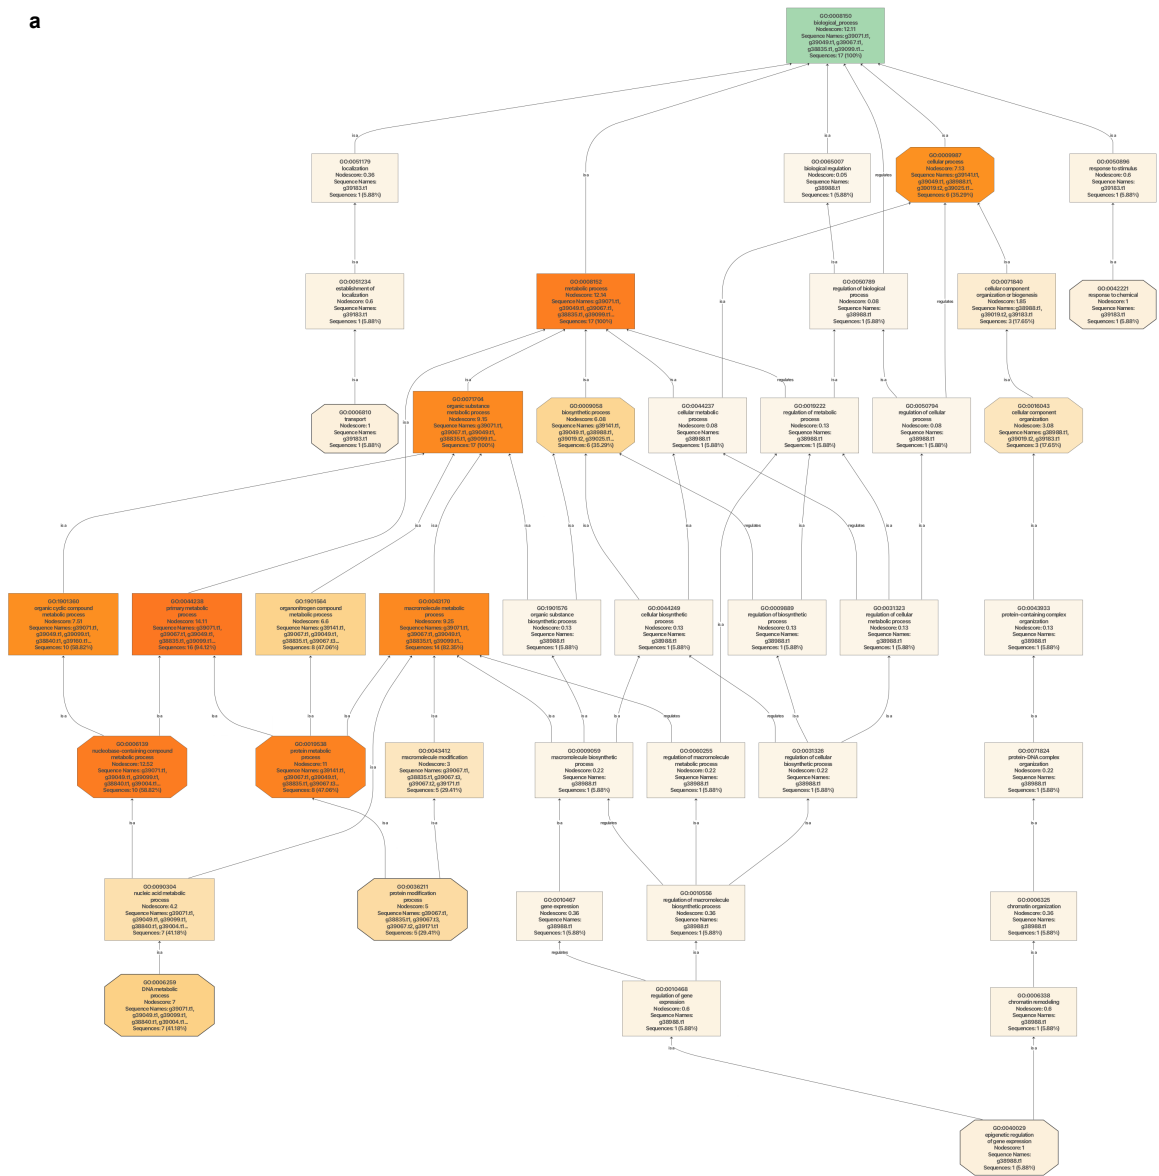

Supplementary Figure 5.3: a, A combined biological process Gene Ontology (GO) chart depicting the distribution of 40 transcripts from SDR, where female-specific k-mers were mapped (sex-associated genes).
