# Supplementary material for: Saltgrass genomes reveal unique features of a dioecious, perennial, halophytic grass
Source: Research Square preprint supplement (doi:10.21203/rs.3.rs-4844604/v1), 2024-08-23
Supplement: Supplementary file 1 [file f9b73c6ca187b083c6845782.xlsx]

## Sheet: W6-48549-006_v1
Sequence Name	Sequence Description	Sequence Length	Enzyme Code	Enzyme Name	InterPro Accession	InterPro Name	Annotation GO ID	Annotation GO Term
Dis.W6-48549-006.v1.1AG00001.t1	RLM79790.1putative invertase inhibitor	133			IPR035513;noIPR	Invertase/pectin methylesterase inhibitor domain superfamily;Invertase/pectin methylesterase inhibitor domain superfamily	GO:0004857;GO:0016020;GO:0022857;GO:0055085	enzyme inhibitor activity;membrane;transmembrane transporter activity;transmembrane transport
Dis.W6-48549-006.v1.1AG00002.t1	XP_034594581.1uncharacterized protein LOC117856295	127			noIPR	Myosin-binding protein
Dis.W6-48549-006.v1.1AG00003.t1	KAG8076446.1hypothetical protein GUJ93_ZPchr0006g40995	664			noIPR;IPR001005;IPR044822;noIPR;noIPR;noIPR;noIPR;noIPR;noIPR;noIPR;noIPR;noIPR;noIPR;noIPR;IPR001005;noIPR	Glycoside hydrolase superfamily;SANT/Myb domain;Myb/SANT-like DNA-binding domain 4;Myb/SANT-like DNA-binding domain 4;Myb/SANT-like DNA-binding domain 4;Myb/SANT-like DNA-binding domain 4;Myb/SANT-like DNA-binding domain 4;Myb/SANT-like DNA-binding domain 4;Myb/SANT-like DNA-binding domain 4;Myb/SANT-like DNA-binding domain 4;Myb/SANT-like DNA-binding domain 4;Myb/SANT-like DNA-binding domain 4;M…
Dis.W6-48549-006.v1.1AG00004.t1	GJM89963.1hypothetical protein PR202_ga06195	470			noIPR;noIPR;noIPR;noIPR;noIPR;noIPR;noIPR;IPR024880	Ankyrin repeat-containing domain superfamily;Ankyrin repeat-containing domain superfamily;Ankyrin repeat-containing domain superfamily;Ankyrin repeat-containing domain superfamily;Ankyrin repeat-containing domain superfamily;Ankyrin repeat-containing domain superfamily;Ankyrin repeat-containing domain superfamily;COPII coat assembly protein, Sec16	GO:0000139;GO:0006914;GO:0007030;GO:0012507;GO:0015031;GO:0048208;GO:0070971;GO:0070973	Golgi membrane;autophagy;Golgi organization;ER to Golgi transport vesicle membrane;protein transport;COPII vesicle coating;endoplasmic reticulum exit site;protein localization to endoplasmic reticulum exit site
Dis.W6-48549-006.v1.1AG00005.t1	XP_004951204.1dihydrolipoyllysine-residue acetyltransferase component 3 of pyruvate dehydrogenase complex, mitochondrial	586	EC:2.3.1.12	dihydrolipoyllysine-residue acetyltransferase	noIPR;noIPR;noIPR;IPR023213;IPR001078;IPR036625;IPR006257;IPR000089;noIPR;IPR004167;noIPR;noIPR;IPR045257;IPR003016;IPR000089;IPR004167;noIPR;noIPR;IPR011053;IPR036625	PA domain superfamily;PA domain superfamily;PA domain superfamily;Chloramphenicol acetyltransferase-like domain superfamily;2-oxoacid dehydrogenase acyltransferase, catalytic domain;E3-binding domain superfamily;Dihydrolipoyllysine-residue acetyltransferase component of pyruvate dehydrogenase complex;Biotin/lipoyl attachment;Biotin/lipoyl attachment;Peripheral subunit-binding domain;Peripheral su…	GO:0004742;GO:0005739;GO:0006086;GO:0045254	dihydrolipoyllysine-residue acetyltransferase activity;mitochondrion;acetyl-CoA biosynthetic process from pyruvate;pyruvate dehydrogenase complex
Dis.W6-48549-006.v1.1AG00006.t1	GJM89968.1hypothetical protein PR202_ga06200	146	EC:3.2.1	Glycosylases	IPR013148;IPR023296;noIPR;IPR023296	Glycosyl hydrolase family 32, N-terminal;Glycosyl hydrolase, five-bladed beta-propellor domain superfamily;Glycosyl hydrolase, five-bladed beta-propellor domain superfamily;Glycosyl hydrolase, five-bladed beta-propellor domain superfamily	GO:0004553;GO:0008152;GO:0110165	hydrolase activity, hydrolyzing O-glycosyl compounds;metabolic process;cellular anatomical entity
Dis.W6-48549-006.v1.1AG00007.t1	GJM89968.1hypothetical protein PR202_ga06200	220	EC:3.2.1	Glycosylases	IPR001362;noIPR;IPR013148;IPR023296;IPR013189;noIPR;IPR023296;IPR013320	Glycoside hydrolase, family 32;Glycoside hydrolase, family 32;Glycosyl hydrolase family 32, N-terminal;Glycosyl hydrolase, five-bladed beta-propellor domain superfamily;Glycosyl hydrolase family 32, C-terminal;Glycosyl hydrolase family 32, C-terminal;Glycosyl hydrolase, five-bladed beta-propellor domain superfamily;Concanavalin A-like lectin/glucanase domain superfamily	GO:0004553;GO:0008152;GO:0110165	hydrolase activity, hydrolyzing O-glycosyl compounds;metabolic process;cellular anatomical entity
Dis.W6-48549-006.v1.1AG00008.t1	TVU33709.1hypothetical protein EJB05_25542	411			noIPR;IPR012926;IPR012926	Ubiquitin-like domain superfamily;Ion channel TACAN/TMEM120B;Ion channel TACAN/TMEM120B	GO:0016020	membrane
Dis.W6-48549-006.v1.1AG00009.t1	KAJ1297180.1hypothetical protein BS78_01G358000	515	EC:1.14.13	Acting on paired donors, with incorporation or reduction of molecular oxygen. The oxygen incorporated need not be derived from O2	IPR001128;IPR002401;noIPR;IPR001128;IPR036396;noIPR;noIPR;noIPR;IPR017972;noIPR;IPR036396	Cytochrome P450;Cytochrome P450, E-class, group I;Cytochrome P450, E-class, group I;Cytochrome P450;Cytochrome P450 superfamily;Cytochrome P450 superfamily;Cytochrome P450 superfamily;Cytochrome P450 superfamily;Cytochrome P450, conserved site;Cytochrome P450, conserved site;Cytochrome P450 superfamily	GO:0005506;GO:0016020;GO:0016709;GO:0020037;GO:0071704	iron ion binding;membrane;oxidoreductase activity, acting on paired donors, with incorporation or reduction of molecular oxygen, NAD(P)H as one donor, and incorporation of one atom of oxygen;heme binding;organic substance metabolic process
Dis.W6-48549-006.v1.1AG00010.t1	-	99
Dis.W6-48549-006.v1.1AG00011.t1	RLN09879.1hypothetical protein C2845_PM11G11990	430			noIPR;noIPR;IPR008511;noIPR;noIPR	FAD-linked oxidase-like, C-terminal;FAD-linked oxidase-like, C-terminal;Protein ROH1-like;Protein ROH1-like;Protein ROH1-like	GO:0016020	membrane
Dis.W6-48549-006.v1.1AG00012.t1	-	78
Dis.W6-48549-006.v1.1AG00013.t1	GJM89980.1hypothetical protein PR202_ga06214	672	EC:4.1.1.33	diphosphomevalonate decarboxylase	noIPR;noIPR;noIPR;noIPR;IPR019734;IPR011990;IPR011990;IPR011990;noIPR;noIPR;noIPR;noIPR;noIPR;IPR019734;IPR019734;IPR019734;IPR011990;IPR011990;IPR011990	Terpenoid cyclases/protein prenyltransferase alpha-alpha toroid;Terpenoid cyclases/protein prenyltransferase alpha-alpha toroid;Terpenoid cyclases/protein prenyltransferase alpha-alpha toroid;Terpenoid cyclases/protein prenyltransferase alpha-alpha toroid;Tetratricopeptide repeat;Tetratricopeptide-like helical domain superfamily;Tetratricopeptide-like helical domain superfamily;Tetratricopeptide-…	GO:0004163;GO:0005524;GO:0005829;GO:0009536;GO:0009579;GO:0019287;GO:0055028	diphosphomevalonate decarboxylase activity;ATP binding;cytosol;plastid;thylakoid;isopentenyl diphosphate biosynthetic process, mevalonate pathway;cortical microtubule
Dis.W6-48549-006.v1.1AG00014.t1	TVU33696.1hypothetical protein EJB05_25529, partial	630			noIPR;noIPR	Ribonuclease H-like superfamily;Ribonuclease H-like superfamily	GO:0016020	membrane
Dis.W6-48549-006.v1.1AG00015.t1	GJM89982.1hypothetical protein PR202_ga06216	169	EC:3.1	Acting on ester bonds	IPR036514;noIPR;noIPR;noIPR;noIPR	SGNH hydrolase superfamily;SGNH hydrolase superfamily;SGNH hydrolase superfamily;SGNH hydrolase superfamily;SGNH hydrolase superfamily	GO:0016788	hydrolase activity, acting on ester bonds
Dis.W6-48549-006.v1.1AG00016.t1	TVU33691.1hypothetical protein EJB05_25524	148			noIPR;IPR010402;noIPR;noIPR;noIPR;noIPR;noIPR;noIPR;IPR010402	Armadillo-type fold;CCT domain;CCT domain;CCT domain;CCT domain;CCT domain;CCT domain;CCT domain;CCT domain	GO:0005634;GO:0008270	nucleus;zinc ion binding
Dis.W6-48549-006.v1.1AG00017.t1	TVU33691.1hypothetical protein EJB05_25524	155			noIPR;IPR000315;IPR000315	Protein of unknown function DUF599;B-box-type zinc finger;B-box-type zinc finger
Dis.W6-48549-006.v1.1AG00018.t1	XP_022681327.1receptor-like serine/threonine-protein kinase NCRK isoform X1	583	EC:2.7.1	Transferring phosphorus-containing groups	noIPR;noIPR;IPR000719;IPR000719;noIPR;noIPR;noIPR;noIPR;noIPR;noIPR;noIPR;noIPR;noIPR;noIPR;noIPR;noIPR;noIPR;noIPR;noIPR;noIPR;noIPR;noIPR;noIPR;noIPR;noIPR;noIPR;noIPR;noIPR;noIPR;noIPR;noIPR;noIPR;noIPR;noIPR;noIPR;noIPR;noIPR;noIPR;noIPR;noIPR;noIPR;noIPR;noIPR;noIPR;noIPR;noIPR;noIPR;noIPR;noIPR;noIPR;noIPR;noIPR;noIPR;noIPR;noIPR;noIPR;noIPR;noIPR;noIPR;noIPR;noIPR;noIPR;noIPR;noIPR;noIPR;n…	AAA-type ATPase, N-terminal domain;AAA-type ATPase, N-terminal domain;Protein kinase domain;Protein kinase domain;Protein kinase domain;Protein kinase domain;Protein kinase domain;Protein kinase domain;Protein kinase domain;Protein kinase domain;Protein kinase domain;Protein kinase domain;Protein kinase domain;Protein kinase domain;Protein kinase domain;Protein kinase domain;Protein kinase domain…	GO:0004672;GO:0005524;GO:0016020;GO:0016310	protein kinase activity;ATP binding;membrane;phosphorylation
Dis.W6-48549-006.v1.1AG00019.t1	XP_025812756.1uncharacterized protein LOC112890111	1977			noIPR;noIPR;IPR027417;IPR038718;noIPR;noIPR;noIPR;noIPR;noIPR;noIPR;noIPR;noIPR;noIPR;noIPR;noIPR;noIPR;noIPR;noIPR;noIPR;noIPR;noIPR;noIPR;IPR039322;IPR027417	Ankyrin repeat-containing domain superfamily;Ankyrin repeat-containing domain superfamily;P-loop containing nucleoside triphosphate hydrolase;SNF2-like, N-terminal domain superfamily;SNF2-like, N-terminal domain superfamily;SNF2-like, N-terminal domain superfamily;SNF2-like, N-terminal domain superfamily;SNF2-like, N-terminal domain superfamily;SNF2-like, N-terminal domain superfamily;SNF2-like, …
Dis.W6-48549-006.v1.1AG00020.t1	-	76
Dis.W6-48549-006.v1.1AG00021.t1	XP_006646776.160S ribosomal protein L37-1-like	94			noIPR;IPR001569;IPR011331;noIPR;IPR018267;IPR001569;IPR011332	Zinc finger, RING-type;Ribosomal protein L37e;Ribosomal protein L37ae/L37e;Ribosomal protein L37ae/L37e;Ribosomal protein L37e, conserved site;Ribosomal protein L37e;Zinc-binding ribosomal protein	GO:0003735;GO:0006412;GO:0009536;GO:0019843;GO:0022625;GO:0046872	structural constituent of ribosome;translation;plastid;rRNA binding;cytosolic large ribosomal subunit;metal ion binding
Dis.W6-48549-006.v1.1AG00022.t1	XP_025804564.1MDIS1-interacting receptor like kinase 1-like	1016	EC:2.7.1	Transferring phosphorus-containing groups	noIPR;noIPR;noIPR;noIPR;noIPR;noIPR;IPR003591;IPR000719;IPR000719;IPR032675;IPR001611;IPR013210;noIPR;IPR001611;noIPR;IPR032675;IPR032675;noIPR;noIPR;noIPR;noIPR;noIPR;noIPR;noIPR;noIPR;noIPR;noIPR;noIPR;noIPR;noIPR;noIPR;noIPR;noIPR;noIPR;noIPR;noIPR;noIPR;noIPR;noIPR;noIPR;noIPR;noIPR;noIPR;noIPR;noIPR;noIPR;noIPR;noIPR;noIPR;noIPR;noIPR;noIPR;noIPR;noIPR;noIPR;noIPR;noIPR;noIPR;noIPR;noIPR;noI…	At4g14100-like;At4g14100-like;At4g14100-like;At4g14100-like;At4g14100-like;At4g14100-like;Leucine-rich repeat, typical subtype;Protein kinase domain;Protein kinase domain;Leucine-rich repeat domain superfamily;Leucine-rich repeat;Leucine-rich repeat-containing N-terminal, plant-type;Leucine-rich repeat-containing N-terminal, plant-type;Leucine-rich repeat;Leucine-rich repeat;Leucine-rich repeat d…	GO:0004672;GO:0005524;GO:0016020;GO:0016310	protein kinase activity;ATP binding;membrane;phosphorylation
Dis.W6-48549-006.v1.1AG00023.t1	TVU33681.1hypothetical protein EJB05_25514, partial	535			noIPR;noIPR;IPR011701;IPR036259;IPR036259;noIPR;noIPR;IPR044772;IPR044772;IPR036259	S-adenosyl-L-methionine-dependent methyltransferase superfamily;S-adenosyl-L-methionine-dependent methyltransferase superfamily;Major facilitator superfamily;MFS transporter superfamily;MFS transporter superfamily;MFS transporter superfamily;MFS transporter superfamily;Nitrate transporter;Nitrate transporter;MFS transporter superfamily	GO:0005886;GO:0015112;GO:0015706;GO:0071249	plasma membrane;nitrate transmembrane transporter activity;nitrate transmembrane transport;cellular response to nitrate
Dis.W6-48549-006.v1.1AG00024.t1	GJM89997.1hypothetical protein PR202_ga06232	518			noIPR;noIPR;IPR011701;IPR036259;IPR036259;IPR044772;IPR044772;IPR036259	Tetraspanin/Peripherin;Tetraspanin/Peripherin;Major facilitator superfamily;MFS transporter superfamily;MFS transporter superfamily;Nitrate transporter;Nitrate transporter;MFS transporter superfamily	GO:0015112;GO:0015706;GO:0016020	nitrate transmembrane transporter activity;nitrate transmembrane transport;membrane
Dis.W6-48549-006.v1.1AG00025.t1	TVU33677.1hypothetical protein EJB05_25510, partial	159			noIPR;noIPR;IPR044772	Ankyrin repeat-containing domain superfamily;Ankyrin repeat-containing domain superfamily;Nitrate transporter	GO:0005886;GO:0015112;GO:0015706;GO:0071249	plasma membrane;nitrate transmembrane transporter activity;nitrate transmembrane transport;cellular response to nitrate
Dis.W6-48549-006.v1.1AG00026.t1	CAB3445290.1unnamed protein product	173			IPR036259;IPR044772;IPR036259	MFS transporter superfamily;Nitrate transporter;MFS transporter superfamily	GO:0005886;GO:0015112;GO:0015706;GO:0071249	plasma membrane;nitrate transmembrane transporter activity;nitrate transmembrane transport;cellular response to nitrate
Dis.W6-48549-006.v1.1AG00027.t1	KAG2647989.1hypothetical protein PVAP13_1NG011219	115			IPR044772;IPR036259	Nitrate transporter;MFS transporter superfamily	GO:0015112;GO:0015706;GO:0016020	nitrate transmembrane transporter activity;nitrate transmembrane transport;membrane
Dis.W6-48549-006.v1.1AG00028.t1	TVU33662.1hypothetical protein EJB05_25494	503	EC:2.3.1.198;EC:3.1.3	glycerol-3-phosphate 2-O-acyltransferase;Acting on ester bonds	IPR002123;noIPR;noIPR;IPR023214;IPR002123;noIPR;noIPR	Phospholipid/glycerol acyltransferase;Phospholipid/glycerol acyltransferase;Phospholipid/glycerol acyltransferase;HAD superfamily;Phospholipid/glycerol acyltransferase;Phospholipid/glycerol acyltransferase;Phospholipid/glycerol acyltransferase	GO:0010143;GO:0016020;GO:0016791;GO:0090447	cutin biosynthetic process;membrane;phosphatase activity;glycerol-3-phosphate 2-O-acyltransferase activity
Dis.W6-48549-006.v1.1AG00029.t1	-	70
Dis.W6-48549-006.v1.1AG00030.t1	GJM90004.1hypothetical protein PR202_ga06240	597	EC:3.1	Acting on ester bonds	noIPR;IPR033411;noIPR;IPR014881;IPR036283;IPR017117;noIPR;noIPR;noIPR;noIPR;noIPR;noIPR;noIPR;noIPR;IPR039907;IPR033411;IPR036283	Protein kinase-like domain superfamily;Ribonuclease, PIN domain;Ribonuclease, PIN domain;Nin one binding (NOB1) Zn-ribbon-like;NOB1 zinc finger-like superfamily;Ribonuclease Nob1, eukaryote;Ribonuclease Nob1, eukaryote;Ribonuclease Nob1, eukaryote;Ribonuclease Nob1, eukaryote;Ribonuclease Nob1, eukaryote;Ribonuclease Nob1, eukaryote;Ribonuclease Nob1, eukaryote;Ribonuclease Nob1, eukaryote;Ribonu…	GO:0004521;GO:0005654;GO:0005737;GO:0009553;GO:0009555;GO:0030490;GO:0030688;GO:0046872	RNA endonuclease activity;nucleoplasm;cytoplasm;embryo sac development;pollen development;maturation of SSU-rRNA;preribosome, small subunit precursor;metal ion binding
Dis.W6-48549-006.v1.1AG00031.t1	TVU33669.1hypothetical protein EJB05_25501, partial	288			noIPR;noIPR;IPR001005;IPR001005;noIPR;noIPR;noIPR;noIPR;IPR017930;IPR001005;IPR017930;IPR001005;IPR001005;IPR001005;IPR009057	C2 domain superfamily;C2 domain superfamily;SANT/Myb domain;SANT/Myb domain;SANT/Myb domain;SANT/Myb domain;SANT/Myb domain;SANT/Myb domain;Myb domain;SANT/Myb domain;Myb domain;SANT/Myb domain;SANT/Myb domain;SANT/Myb domain;Homeobox-like domain superfamily	GO:0000976;GO:0005634;GO:0006355	transcription cis-regulatory region binding;nucleus;regulation of DNA-templated transcription
Dis.W6-48549-006.v1.1AG00032.t1	XP_039836461.1WD repeat-containing protein RUP2-like	417			IPR001680;IPR001680;IPR015943;noIPR;noIPR;IPR044616;IPR001680;IPR001680;IPR036322	WD40 repeat;WD40 repeat;WD40/YVTN repeat-like-containing domain superfamily;WD40/YVTN repeat-like-containing domain superfamily;WD40/YVTN repeat-like-containing domain superfamily;WD repeat-containing protein RUP1/2;WD40 repeat;WD40 repeat;WD40-repeat-containing domain superfamily
Dis.W6-48549-006.v1.1AG00033.t1	KAJ1277526.1hypothetical protein BS78_04G011200	683	EC:3.6.1.15	nucleoside-triphosphate phosphatase	noIPR;noIPR;noIPR;noIPR;noIPR;noIPR;noIPR;noIPR;noIPR;noIPR;noIPR;noIPR;IPR013126;noIPR;noIPR;IPR029048;IPR029047;noIPR;IPR013126;IPR018181;IPR018181;IPR018181;IPR042050;IPR029047;IPR043129;IPR043129;IPR029048	Protein kinase-like domain superfamily;Protein kinase-like domain superfamily;Protein kinase-like domain superfamily;Protein kinase-like domain superfamily;Protein kinase-like domain superfamily;Protein kinase-like domain superfamily;Protein kinase-like domain superfamily;Protein kinase-like domain superfamily;Protein kinase-like domain superfamily;Protein kinase-like domain superfamily;Protein k…	GO:0005524;GO:0005634;GO:0005788;GO:0016020;GO:0016887;GO:0030968;GO:0031072;GO:0034663;GO:0042026;GO:0051085;GO:0140662	ATP binding;nucleus;endoplasmic reticulum lumen;membrane;ATP hydrolysis activity;endoplasmic reticulum unfolded protein response;heat shock protein binding;endoplasmic reticulum chaperone complex;protein refolding;chaperone cofactor-dependent protein refolding;ATP-dependent protein folding chaperone
Dis.W6-48549-006.v1.1AG00034.t1	GJM90010.1hypothetical protein PR202_ga06246	421			IPR004813;IPR004813;IPR045035	Oligopeptide transporter, OPT superfamily;Oligopeptide transporter, OPT superfamily;Metal-nicotianamine transporter YSL-like	GO:0016020;GO:0035672;GO:0035673	membrane;oligopeptide transmembrane transport;oligopeptide transmembrane transporter activity
Dis.W6-48549-006.v1.1AG00035.t1	GJN18800.1hypothetical protein PR202_gb06002	185			IPR004813;IPR045035	Oligopeptide transporter, OPT superfamily;Metal-nicotianamine transporter YSL-like	GO:0016020;GO:0035672;GO:0035673	membrane;oligopeptide transmembrane transport;oligopeptide transmembrane transporter activity
Dis.W6-48549-006.v1.1AG00036.t1	CAD6248413.1unnamed protein product	505			IPR004813;IPR004813;IPR045035	Oligopeptide transporter, OPT superfamily;Oligopeptide transporter, OPT superfamily;Metal-nicotianamine transporter YSL-like	GO:0016020;GO:0035672;GO:0035673	membrane;oligopeptide transmembrane transport;oligopeptide transmembrane transporter activity
Dis.W6-48549-006.v1.1AG00037.t1	OAY85957.1hypothetical protein ACMD2_05090, partial	154			noIPR;noIPR	SOB-five-Like (SOFL) family;SOB-five-Like (SOFL) family
Dis.W6-48549-006.v1.1AG00038.t1	-	137
Dis.W6-48549-006.v1.1AG00039.t1	GJN18801.1hypothetical protein PR202_gb06003	400			IPR002347;IPR002347;noIPR;IPR002347;noIPR;noIPR;noIPR;IPR036291	Short-chain dehydrogenase/reductase SDR;Short-chain dehydrogenase/reductase SDR;Short-chain dehydrogenase/reductase SDR;Short-chain dehydrogenase/reductase SDR;Short-chain dehydrogenase/reductase SDR;Short-chain dehydrogenase/reductase SDR;Short-chain dehydrogenase/reductase SDR;NAD(P)-binding domain superfamily
Dis.W6-48549-006.v1.1AG00040.t1	TVU33648.1hypothetical protein EJB05_25478	140			noIPR;IPR036638;IPR011598;IPR044818;IPR011598;IPR036638	DNA/RNA polymerase superfamily;Helix-loop-helix DNA-binding domain superfamily;Myc-type, basic helix-loop-helix (bHLH) domain;Transcription factor ILR3-like;Myc-type, basic helix-loop-helix (bHLH) domain;Helix-loop-helix DNA-binding domain superfamily	GO:0003700;GO:0006355;GO:0006879;GO:0046983	DNA-binding transcription factor activity;regulation of DNA-templated transcription;intracellular iron ion homeostasis;protein dimerization activity
Dis.W6-48549-006.v1.1AG00041.t1	XP_025804716.1phytosulfokine receptor 1-like	1058	EC:2.7.1	Transferring phosphorus-containing groups	noIPR;noIPR;noIPR;noIPR;IPR003591;IPR000719;IPR032675;noIPR;noIPR;IPR032675;IPR001611;IPR013210;IPR032675;IPR000719;noIPR;noIPR;noIPR;noIPR;noIPR;noIPR;noIPR;noIPR;noIPR;noIPR;noIPR;noIPR;noIPR;noIPR;noIPR;noIPR;noIPR;noIPR;noIPR;noIPR;noIPR;noIPR;noIPR;noIPR;noIPR;noIPR;noIPR;noIPR;noIPR;noIPR;noIPR;noIPR;noIPR;noIPR;noIPR;noIPR;noIPR;noIPR;noIPR;noIPR;noIPR;noIPR;noIPR;noIPR;noIPR;noIPR;noIPR;n…	Ubiquitin-like domain superfamily;Ubiquitin-like domain superfamily;Ubiquitin-like domain superfamily;Ubiquitin-like domain superfamily;Leucine-rich repeat, typical subtype;Protein kinase domain;Leucine-rich repeat domain superfamily;Leucine-rich repeat domain superfamily;Leucine-rich repeat domain superfamily;Leucine-rich repeat domain superfamily;Leucine-rich repeat;Leucine-rich repeat-containi…	GO:0004672;GO:0005524;GO:0005886;GO:0016310	protein kinase activity;ATP binding;plasma membrane;phosphorylation
Dis.W6-48549-006.v1.1AG00042.t1	TVU33652.1hypothetical protein EJB05_25482	503			noIPR;IPR005516;noIPR;noIPR;noIPR;noIPR;noIPR	Protein PIN-LIKES 2/6;Remorin, C-terminal;Remorin, C-terminal;Remorin, C-terminal;Remorin, C-terminal;Remorin, C-terminal;Remorin, C-terminal
Dis.W6-48549-006.v1.1AG00043.t1	KAJ1296359.1hypothetical protein BS78_01G294500	562	EC:2.3.1	Acyltransferases	noIPR;IPR006590;IPR025846;IPR005574;IPR026057;IPR038324;IPR029962;IPR010997	Outer envelope membrane protein 7-like;RNA polymerase Rpb4/RPC9, core;Trichome birefringence-like, N-terminal domain;RNA polymerase subunit Rpb4/RPC9;PC-Esterase;Rpb4/RPC9 superfamily;Trichome birefringence-like family;HRDC-like superfamily	GO:0000139;GO:1990538;GO:1990937	Golgi membrane;xylan O-acetyltransferase activity;xylan acetylation
Dis.W6-48549-006.v1.1AG00044.t1	RLN17147.1pentatricopeptide repeat-containing protein	488			IPR002885;IPR011990;IPR002885;IPR002885;noIPR;noIPR;noIPR;noIPR;IPR002885;IPR002885;IPR002885	Pentatricopeptide repeat;Tetratricopeptide-like helical domain superfamily;Pentatricopeptide repeat;Pentatricopeptide repeat;Pentatricopeptide repeat;Pentatricopeptide repeat;Pentatricopeptide repeat;Pentatricopeptide repeat;Pentatricopeptide repeat;Pentatricopeptide repeat;Pentatricopeptide repeat
Dis.W6-48549-006.v1.1AG00044.t2	AQL05746.1Pentatricopeptide repeat-containing protein	431			IPR002885;IPR002885;IPR002885;IPR011990;noIPR;noIPR;noIPR;IPR002885;IPR002885;IPR002885	Pentatricopeptide repeat;Pentatricopeptide repeat;Pentatricopeptide repeat;Tetratricopeptide-like helical domain superfamily;Tetratricopeptide-like helical domain superfamily;Tetratricopeptide-like helical domain superfamily;Tetratricopeptide-like helical domain superfamily;Pentatricopeptide repeat;Pentatricopeptide repeat;Pentatricopeptide repeat
Dis.W6-48549-006.v1.1AG00045.t1	GJN18815.1hypothetical protein PR202_gb06017	158			noIPR;IPR004977;noIPR;noIPR;IPR004977	Pyridoxal phosphate-dependent transferase;Ribosomal protein S25;Ribosomal protein S25;Ribosomal protein S25;Ribosomal protein S25	GO:0003735;GO:0022627	structural constituent of ribosome;cytosolic small ribosomal subunit
Dis.W6-48549-006.v1.1AG00046.t1	-	73
Dis.W6-48549-006.v1.1AG00047.t1	TVU33642.1hypothetical protein EJB05_25472	426	EC:2.7.11.1	non-specific serine/threonine protein kinase	noIPR;noIPR;noIPR;IPR001245;noIPR;noIPR;noIPR;noIPR;noIPR;noIPR;noIPR;noIPR;noIPR;noIPR;noIPR;noIPR;noIPR;noIPR;noIPR;noIPR;noIPR;noIPR;noIPR;noIPR;noIPR;noIPR;noIPR;noIPR;noIPR;noIPR;noIPR;noIPR;noIPR;noIPR;noIPR;noIPR;noIPR;noIPR;noIPR;noIPR;noIPR;noIPR;noIPR;noIPR;noIPR;noIPR;noIPR;noIPR;noIPR;noIPR;noIPR;noIPR;noIPR;noIPR;noIPR;noIPR;noIPR;noIPR;noIPR;noIPR;noIPR;noIPR;noIPR;noIPR;noIPR;noIPR…	Zinc finger, RING-type;Zinc finger, RING-type;Zinc finger, RING-type;Serine-threonine/tyrosine-protein kinase, catalytic domain;Serine-threonine/tyrosine-protein kinase, catalytic domain;Serine-threonine/tyrosine-protein kinase, catalytic domain;Serine-threonine/tyrosine-protein kinase, catalytic domain;Serine-threonine/tyrosine-protein kinase, catalytic domain;Serine-threonine/tyrosine-protein k…	GO:0004674;GO:0005524;GO:0016310	protein serine/threonine kinase activity;ATP binding;phosphorylation
Dis.W6-48549-006.v1.1AG00048.t1	TVU33643.1hypothetical protein EJB05_25473	427	EC:3.4.17	Acting on peptide bonds (peptidases)	noIPR;IPR000834;IPR000834;noIPR;noIPR;IPR034269;noIPR	Nonaspanin (TM9SF);Peptidase M14, carboxypeptidase A;Peptidase M14, carboxypeptidase A;Peptidase M14, carboxypeptidase A;Peptidase M14, carboxypeptidase A;At5g42320-like, carboxypeptidase domain;At5g42320-like, carboxypeptidase domain	GO:0004181;GO:0006508;GO:0008270;GO:0016020	metallocarboxypeptidase activity;proteolysis;zinc ion binding;membrane
Dis.W6-48549-006.v1.1AG00049.t1	TVU33640.1hypothetical protein EJB05_25470	439			noIPR	Protein kinase-like domain superfamily
Dis.W6-48549-006.v1.1AG00050.t1	KAJ1297211.1hypothetical protein BS78_01G360400	366			IPR011990;IPR033443;IPR002885;IPR011990;noIPR;noIPR;noIPR;IPR002885;IPR002885;IPR002885;IPR002885;noIPR	Tetratricopeptide-like helical domain superfamily;Pentacotripeptide-repeat region of PRORP;Pentatricopeptide repeat;Tetratricopeptide-like helical domain superfamily;Tetratricopeptide-like helical domain superfamily;Tetratricopeptide-like helical domain superfamily;Tetratricopeptide-like helical domain superfamily;Pentatricopeptide repeat;Pentatricopeptide repeat;Pentatricopeptide repeat;Pentatri…	GO:0003729;GO:0005737;GO:0006397	mRNA binding;cytoplasm;mRNA processing
Dis.W6-48549-006.v1.1AG00051.t1	CAD6248369.1unnamed protein product	193	EC:2.7.8	Transferring phosphorus-containing groups	IPR043130;IPR000462;IPR014472;IPR000462	CDP-alcohol phosphatidyltransferase, transmembrane domain;CDP-alcohol phosphatidyltransferase;Choline/ethanolamine phosphotransferase;CDP-alcohol phosphatidyltransferase	GO:0008654;GO:0016020;GO:0016780	phospholipid biosynthetic process;membrane;phosphotransferase activity, for other substituted phosphate groups
Dis.W6-48549-006.v1.1AG00052.t1	CAB3445341.1unnamed protein product	71	EC:2.7.8	Transferring phosphorus-containing groups			GO:0008654;GO:0016020;GO:0016780	phospholipid biosynthetic process;membrane;phosphotransferase activity, for other substituted phosphate groups
Dis.W6-48549-006.v1.1AG00053.t1	NP_001105197.1Rho-related protein from plants 9	197	EC:3.6.1.15	nucleoside-triphosphate phosphatase	noIPR;noIPR;IPR001806;noIPR;noIPR;IPR027417;IPR001806;IPR005225;IPR003578;noIPR;IPR001806;noIPR;noIPR;IPR027417	P-loop containing nucleoside triphosphate hydrolase;P-loop containing nucleoside triphosphate hydrolase;Small GTPase;Small GTPase;Small GTPase;P-loop containing nucleoside triphosphate hydrolase;Small GTPase;Small GTP-binding protein domain;Small GTPase Rho;Small GTPase Rho;Small GTPase;Small GTPase;Small GTPase;P-loop containing nucleoside triphosphate hydrolase	GO:0003924;GO:0005525;GO:0005856;GO:0005886;GO:0007015;GO:0007163;GO:0007264;GO:0008360;GO:0015031;GO:0019901;GO:0030865;GO:0031410;GO:0032956;GO:0042995	GTPase activity;GTP binding;cytoskeleton;plasma membrane;actin filament organization;establishment or maintenance of cell polarity;small GTPase-mediated signal transduction;regulation of cell shape;protein transport;protein kinase binding;cortical cytoskeleton organization;cytoplasmic vesicle;regulation of actin cytoskeleton organization;cell projection
Dis.W6-48549-006.v1.1AG00054.t1	-	114			noIPR;noIPR;noIPR	HotDog domain superfamily;HotDog domain superfamily;HotDog domain superfamily
Dis.W6-48549-006.v1.1AG00055.t1	TVU33626.1hypothetical protein EJB05_25452	298			IPR000924;IPR014729;IPR020058;IPR014729;noIPR;noIPR;IPR001412;noIPR;noIPR	Glutamyl/glutaminyl-tRNA synthetase;Rossmann-like alpha/beta/alpha sandwich fold;Glutamyl/glutaminyl-tRNA synthetase, class Ib, catalytic domain;Rossmann-like alpha/beta/alpha sandwich fold;Rossmann-like alpha/beta/alpha sandwich fold;Rossmann-like alpha/beta/alpha sandwich fold;Aminoacyl-tRNA synthetase, class I, conserved site;Aminoacyl-tRNA synthetase, class I, conserved site;Aminoacyl-tRNA sy…	GO:0034641;GO:0043170;GO:0044238	cellular nitrogen compound metabolic process;macromolecule metabolic process;primary metabolic process
Dis.W6-48549-006.v1.1AG00056.t1	-	86
Dis.W6-48549-006.v1.1AG00057.t1	-	108			IPR001878;IPR001878;noIPR;noIPR;noIPR;noIPR;IPR001878;IPR001878;IPR001878;IPR036875;IPR036875	Zinc finger, CCHC-type;Zinc finger, CCHC-type;Zinc finger, CCHC-type;Zinc finger, CCHC-type;Zinc finger, CCHC-type;Zinc finger, CCHC-type;Zinc finger, CCHC-type;Zinc finger, CCHC-type;Zinc finger, CCHC-type;Zinc finger, CCHC-type superfamily;Zinc finger, CCHC-type superfamily
Dis.W6-48549-006.v1.1AG00057.t2	GJN18842.1hypothetical protein PR202_gb06045	235	EC:3.4.25	Acting on peptide bonds (peptidases)	noIPR;IPR002059;IPR011129;IPR001878;IPR002059;IPR012340;IPR001878;noIPR;noIPR;IPR019844;IPR001878;IPR001878;IPR001878;IPR002059;IPR001878;IPR002059;IPR036875;IPR036875;IPR012340;IPR036875	Longin-like domain superfamily;Cold-shock protein, DNA-binding;Cold shock domain;Zinc finger, CCHC-type;Cold-shock protein, DNA-binding;Nucleic acid-binding, OB-fold;Zinc finger, CCHC-type;Zinc finger, CCHC-type;Zinc finger, CCHC-type;Cold-shock (CSD) domain;Zinc finger, CCHC-type;Zinc finger, CCHC-type;Zinc finger, CCHC-type;Cold-shock protein, DNA-binding;Zinc finger, CCHC-type;Cold-shock prote…	GO:0003676;GO:0004298;GO:0005737;GO:0005839;GO:0008270;GO:0051603	nucleic acid binding;threonine-type endopeptidase activity;cytoplasm;proteasome core complex;zinc ion binding;proteolysis involved in protein catabolic process
Dis.W6-48549-006.v1.1AG00058.t1	-	75			noIPR	Ribonuclease H-like superfamily
Dis.W6-48549-006.v1.1AG00059.t1	-	115			noIPR	Thioredoxin-like superfamily
Dis.W6-48549-006.v1.1AG00060.t1	TVU33604.1hypothetical protein EJB05_25429, partial	469	EC:2.1.1.181	23S rRNA (adenine(1618)-N(6))-methyltransferase	noIPR;IPR029063;IPR017182;IPR010286;noIPR;IPR010286;IPR029063	HAD-like superfamily;S-adenosyl-L-methionine-dependent methyltransferase superfamily;Methyltransferase METTL16/PsiM;METTL16/RlmF family;METTL16/RlmF family;METTL16/RlmF family;S-adenosyl-L-methionine-dependent methyltransferase superfamily	GO:0003676;GO:0005634;GO:0007623;GO:0008270;GO:0048573;GO:0052907;GO:0070475	nucleic acid binding;nucleus;circadian rhythm;zinc ion binding;photoperiodism, flowering;23S rRNA (adenine(1618)-N(6))-methyltransferase activity;rRNA base methylation
Dis.W6-48549-006.v1.1AG00061.t1	-	112			noIPR;noIPR	Homeobox-like domain superfamily;Homeobox-like domain superfamily
Dis.W6-48549-006.v1.1AG00062.t1	KAF8693278.1hypothetical protein HU200_038662	163	EC:5.2.1.8	peptidylprolyl isomerase	IPR002130;noIPR;IPR024936;IPR002130;IPR029000;noIPR;IPR020892;IPR002130;noIPR;IPR029000	Cyclophilin-type peptidyl-prolyl cis-trans isomerase domain;Cyclophilin-type peptidyl-prolyl cis-trans isomerase domain;Cyclophilin-type peptidyl-prolyl cis-trans isomerase;Cyclophilin-type peptidyl-prolyl cis-trans isomerase domain;Cyclophilin-like domain superfamily;Cyclophilin-like domain superfamily;Cyclophilin-type peptidyl-prolyl cis-trans isomerase, conserved site;Cyclophilin-type peptidyl…	GO:0003755;GO:0005737;GO:0006457;GO:0016018	peptidyl-prolyl cis-trans isomerase activity;cytoplasm;protein folding;cyclosporin A binding
Dis.W6-48549-006.v1.1AG00063.t1	TVU33605.1hypothetical protein EJB05_25430	530			noIPR;noIPR;noIPR;noIPR;noIPR;noIPR;noIPR;noIPR;noIPR;noIPR;noIPR;noIPR;noIPR	ACP-like superfamily;ACP-like superfamily;ACP-like superfamily;ACP-like superfamily;ACP-like superfamily;ACP-like superfamily;ACP-like superfamily;ACP-like superfamily;ACP-like superfamily;ACP-like superfamily;ACP-like superfamily;ACP-like superfamily;ACP-like superfamily
Dis.W6-48549-006.v1.1AG00064.t1	KAF8685814.1hypothetical protein HU200_043721	228			IPR004345;IPR004345	TB2/DP1/HVA22-related protein;TB2/DP1/HVA22-related protein	GO:0016020	membrane
Dis.W6-48549-006.v1.1AG00065.t1	KAJ1277608.1hypothetical protein BS78_04G016900	628			IPR002885;IPR002885;IPR002885;IPR002885;IPR011990;IPR011990;IPR011990;noIPR;IPR002885;IPR002885;IPR002885;IPR002885;IPR002885;IPR002885;IPR002885	Pentatricopeptide repeat;Pentatricopeptide repeat;Pentatricopeptide repeat;Pentatricopeptide repeat;Tetratricopeptide-like helical domain superfamily;Tetratricopeptide-like helical domain superfamily;Tetratricopeptide-like helical domain superfamily;Tetratricopeptide-like helical domain superfamily;Pentatricopeptide repeat;Pentatricopeptide repeat;Pentatricopeptide repeat;Pentatricopeptide repeat…	GO:0003729;GO:0005737;GO:0006397	mRNA binding;cytoplasm;mRNA processing
Dis.W6-48549-006.v1.1AG00065.t2	KAJ1277608.1hypothetical protein BS78_04G016900	616			IPR002885;IPR002885;IPR002885;IPR002885;IPR011990;IPR011990;IPR011990;noIPR;IPR002885;IPR002885;IPR002885;IPR002885;IPR002885;IPR002885;IPR002885	Pentatricopeptide repeat;Pentatricopeptide repeat;Pentatricopeptide repeat;Pentatricopeptide repeat;Tetratricopeptide-like helical domain superfamily;Tetratricopeptide-like helical domain superfamily;Tetratricopeptide-like helical domain superfamily;Tetratricopeptide-like helical domain superfamily;Pentatricopeptide repeat;Pentatricopeptide repeat;Pentatricopeptide repeat;Pentatricopeptide repeat…	GO:0003729;GO:0005737;GO:0006397	mRNA binding;cytoplasm;mRNA processing
Dis.W6-48549-006.v1.1AG00066.t1	XP_039845472.1histone deacetylase complex subunit SAP18-like	135			IPR042534;IPR010516;IPR010516	Sin3 associated polypeptide p18 superfamily;Sin3 associated polypeptide p18;Sin3 associated polypeptide p18	GO:0003714;GO:0005634;GO:0045892	transcription corepressor activity;nucleus;negative regulation of DNA-templated transcription
Dis.W6-48549-006.v1.1AG00067.t1	KAJ1277619.1hypothetical protein BS78_04G017300	231			noIPR;IPR013906;IPR023194;noIPR;noIPR;noIPR;noIPR;noIPR;IPR013906;IPR013906	Proteinase inhibitor I2, Kunitz, conserved site;Eukaryotic translation initiation factor 3 subunit J;Eukaryotic translation initiation factor 3-like domain superfamily;Eukaryotic translation initiation factor 3-like domain superfamily;Eukaryotic translation initiation factor 3-like domain superfamily;Eukaryotic translation initiation factor 3-like domain superfamily;Eukaryotic translation initiat…	GO:0001732;GO:0003743;GO:0005852;GO:0010020;GO:0016282;GO:0033290	formation of cytoplasmic translation initiation complex;translation initiation factor activity;eukaryotic translation initiation factor 3 complex;chloroplast fission;eukaryotic 43S preinitiation complex;eukaryotic 48S preinitiation complex
Dis.W6-48549-006.v1.1AG00068.t1	XP_034586373.1serine/arginine-rich splicing factor RS40-like isoform X1	388	EC:2.1.1	Transferring one-carbon groups	noIPR;IPR000504;IPR000504;IPR012677;noIPR;noIPR;noIPR;noIPR;IPR000504;IPR000504;IPR035979	Basic-leucine zipper domain superfamily;RNA recognition motif domain;RNA recognition motif domain;Nucleotide-binding alpha-beta plait domain superfamily;Nucleotide-binding alpha-beta plait domain superfamily;Nucleotide-binding alpha-beta plait domain superfamily;Nucleotide-binding alpha-beta plait domain superfamily;Nucleotide-binding alpha-beta plait domain superfamily;RNA recognition motif doma…	GO:0000179;GO:0000398;GO:0003723;GO:0016607;GO:0031167	rRNA (adenine-N6,N6-)-dimethyltransferase activity;mRNA splicing, via spliceosome;RNA binding;nuclear speck;rRNA methylation
Dis.W6-48549-006.v1.1AG00068.t2	XP_034586373.1serine/arginine-rich splicing factor RS40-like isoform X1	392	EC:2.1.1	Transferring one-carbon groups	noIPR;IPR000504;IPR000504;IPR012677;noIPR;noIPR;noIPR;noIPR;IPR000504;IPR000504;IPR035979	Protein kinase-like domain superfamily;RNA recognition motif domain;RNA recognition motif domain;Nucleotide-binding alpha-beta plait domain superfamily;Nucleotide-binding alpha-beta plait domain superfamily;Nucleotide-binding alpha-beta plait domain superfamily;Nucleotide-binding alpha-beta plait domain superfamily;Nucleotide-binding alpha-beta plait domain superfamily;RNA recognition motif domai…	GO:0000179;GO:0000398;GO:0003723;GO:0016607;GO:0031167	rRNA (adenine-N6,N6-)-dimethyltransferase activity;mRNA splicing, via spliceosome;RNA binding;nuclear speck;rRNA methylation
Dis.W6-48549-006.v1.1AG00069.t1	TVU33596.1hypothetical protein EJB05_25421, partial	78			IPR000864;noIPR;IPR000864;IPR000864;IPR036354	Proteinase inhibitor I13, potato inhibitor I;Proteinase inhibitor I13, potato inhibitor I;Proteinase inhibitor I13, potato inhibitor I;Proteinase inhibitor I13, potato inhibitor I;Proteinase inhibitor I13, potato inhibitor I superfamily	GO:0004867;GO:0009611	serine-type endopeptidase inhibitor activity;response to wounding
Dis.W6-48549-006.v1.1AG00070.t1	TVU33595.1hypothetical protein EJB05_25420, partial	94			IPR000864;noIPR;IPR000864;IPR000864;IPR000864;IPR036354	Proteinase inhibitor I13, potato inhibitor I;Proteinase inhibitor I13, potato inhibitor I;Proteinase inhibitor I13, potato inhibitor I;Proteinase inhibitor I13, potato inhibitor I;Proteinase inhibitor I13, potato inhibitor I;Proteinase inhibitor I13, potato inhibitor I superfamily	GO:0004867;GO:0009611	serine-type endopeptidase inhibitor activity;response to wounding
Dis.W6-48549-006.v1.1AG00071.t1	CAB3487700.1unnamed protein product	158
Dis.W6-48549-006.v1.1AG00072.t1	-	102			noIPR	Ubiquitin-conjugating enzyme/RWD-like
Dis.W6-48549-006.v1.1AG00073.t1	PUZ73836.1hypothetical protein GQ55_1G019700	481			noIPR;IPR023393;noIPR;IPR002913;noIPR;noIPR	PLC-like phosphodiesterase, TIM beta/alpha-barrel domain superfamily;START-like domain superfamily;START-like domain superfamily;START domain;START domain;START domain	GO:0005634;GO:0008289;GO:0016020	nucleus;lipid binding;membrane
Dis.W6-48549-006.v1.1AG00074.t1	GJM90082.1hypothetical protein PR202_ga06328	137			noIPR;noIPR;IPR038789	Alpha/Beta hydrolase fold;Alpha/Beta hydrolase fold;Protein LOW PSII ACCUMULATION 2 like
Dis.W6-48549-006.v1.1AG00075.t1	TVU33573.1hypothetical protein EJB05_25398	506	EC:4.2.1.33	3-isopropylmalate dehydratase	IPR001030;IPR015931;IPR006251;IPR015931;IPR001030;noIPR;noIPR;noIPR;IPR033941;IPR036008	Aconitase/3-isopropylmalate dehydratase large subunit, alpha/beta/alpha domain;Aconitase/3-isopropylmalate dehydratase large subunit, alpha/beta/alpha, subdomain 1/3;Homoaconitase/3-isopropylmalate dehydratase, large subunit;Aconitase/3-isopropylmalate dehydratase large subunit, alpha/beta/alpha, subdomain 1/3;Aconitase/3-isopropylmalate dehydratase large subunit, alpha/beta/alpha domain;Aconitas…	GO:0003861;GO:0008652;GO:0009098;GO:0046872;GO:0051539	3-isopropylmalate dehydratase activity;amino acid biosynthetic process;leucine biosynthetic process;metal ion binding;4 iron, 4 sulfur cluster binding
Dis.W6-48549-006.v1.1AG00075.t2	TVU33573.1hypothetical protein EJB05_25398	499	EC:4.2.1.33	3-isopropylmalate dehydratase	IPR001030;IPR006251;IPR015931;IPR001030;IPR015931;noIPR;noIPR;noIPR;IPR033941;IPR036008	Aconitase/3-isopropylmalate dehydratase large subunit, alpha/beta/alpha domain;Homoaconitase/3-isopropylmalate dehydratase, large subunit;Aconitase/3-isopropylmalate dehydratase large subunit, alpha/beta/alpha, subdomain 1/3;Aconitase/3-isopropylmalate dehydratase large subunit, alpha/beta/alpha domain;Aconitase/3-isopropylmalate dehydratase large subunit, alpha/beta/alpha, subdomain 1/3;Aconitas…	GO:0003861;GO:0008652;GO:0009098;GO:0046872;GO:0051539	3-isopropylmalate dehydratase activity;amino acid biosynthetic process;leucine biosynthetic process;metal ion binding;4 iron, 4 sulfur cluster binding
Dis.W6-48549-006.v1.1AG00076.t1	GJN18876.1hypothetical protein PR202_gb06086	495			IPR013922;noIPR;IPR006214;noIPR;IPR013922;noIPR;IPR036915	Cyclin PHO80-like;Cyclin PHO80-like;Bax inhibitor 1-related;Bax inhibitor 1-related;Cyclin PHO80-like;Cyclin PHO80-like;Cyclin-like superfamily	GO:0016020;GO:0043066	membrane;negative regulation of apoptotic process
Dis.W6-48549-006.v1.1AG00077.t1	TVU33564.1hypothetical protein EJB05_25389	124	EC:3.2.1.97;EC:3.2.1.20;EC:3.2.1.26;EC:3.2.1.48	endo-alpha-N-acetylgalactosaminidase;alpha-glucosidase;beta-fructofuranosidase;sucrose alpha-glucosidase	noIPR	Wall-associated receptor kinase, galacturonan-binding domain	GO:0004575;GO:0005987;GO:0009535;GO:0033926	sucrose alpha-glucosidase activity;sucrose catabolic process;chloroplast thylakoid membrane;glycopeptide alpha-N-acetylgalactosaminidase activity
Dis.W6-48549-006.v1.1AG00078.t1	GJM90093.1hypothetical protein PR202_ga06340	132	EC:2.7.11.23;EC:2.7.11.1	[RNA-polymerase]-subunit kinase;non-specific serine/threonine protein kinase	IPR004600;IPR036465;IPR004600	TFIIH subunit Tfb4/GTF2H3;von Willebrand factor A-like domain superfamily;TFIIH subunit Tfb4/GTF2H3	GO:0000439;GO:0005675;GO:0006289;GO:0006357;GO:0008353;GO:0016020;GO:0046872	transcription factor TFIIH core complex;transcription factor TFIIH holo complex;nucleotide-excision repair;regulation of transcription by RNA polymerase II;RNA polymerase II CTD heptapeptide repeat kinase activity;membrane;metal ion binding
Dis.W6-48549-006.v1.1AG00079.t1	GJM90096.1hypothetical protein PR202_ga06343	104			IPR046848;IPR011990;IPR046960;IPR002885	E motif;Tetratricopeptide-like helical domain superfamily;Pentatricopeptide repeat-containing protein At4g14850-like, plant;Pentatricopeptide repeat	GO:0003723;GO:0009451	RNA binding;RNA modification
Dis.W6-48549-006.v1.1AG00079.t2	TVU33565.1hypothetical protein EJB05_25390, partial	581	EC:2.7.1	Transferring phosphorus-containing groups	noIPR;noIPR;noIPR;IPR000719;IPR002048;IPR000719;noIPR;noIPR;IPR002048;noIPR;noIPR;noIPR;noIPR;noIPR;noIPR;noIPR;noIPR;noIPR;noIPR;noIPR;noIPR;noIPR;noIPR;noIPR;noIPR;noIPR;noIPR;noIPR;noIPR;noIPR;noIPR;noIPR;noIPR;noIPR;noIPR;noIPR;noIPR;noIPR;noIPR;noIPR;noIPR;noIPR;noIPR;noIPR;noIPR;noIPR;noIPR;noIPR;noIPR;noIPR;noIPR;noIPR;noIPR;noIPR;noIPR;noIPR;noIPR;noIPR;noIPR;noIPR;noIPR;noIPR;noIPR;noIPR…	Phosphofructokinase superfamily;Phosphofructokinase superfamily;Phosphofructokinase superfamily;Protein kinase domain;EF-hand domain;Protein kinase domain;Protein kinase domain;Protein kinase domain;EF-hand domain;EF-hand domain;EF-hand domain;EF-hand domain;EF-hand domain;EF-hand domain;EF-hand domain;EF-hand domain;EF-hand domain;EF-hand domain;EF-hand domain;EF-hand domain;EF-hand domain;EF-ha…	GO:0004672;GO:0005509;GO:0005524;GO:0016310	protein kinase activity;calcium ion binding;ATP binding;phosphorylation
Dis.W6-48549-006.v1.1AG00079.t3	OEL19701.1Calcium-dependent protein kinase 16	953	EC:2.7.1	Transferring phosphorus-containing groups	noIPR;noIPR;noIPR;noIPR;noIPR;IPR000719;IPR002048;noIPR;IPR011990;IPR002048;IPR011990;noIPR;IPR002885;noIPR;noIPR;IPR002885;IPR000719;IPR011990;IPR046848;noIPR;noIPR;noIPR;noIPR;noIPR;noIPR;noIPR;noIPR;noIPR;noIPR;noIPR;noIPR;noIPR;noIPR;noIPR;noIPR;noIPR;noIPR;noIPR;noIPR;noIPR;noIPR;noIPR;noIPR;noIPR;noIPR;noIPR;noIPR;noIPR;noIPR;noIPR;noIPR;noIPR;noIPR;noIPR;noIPR;noIPR;noIPR;noIPR;noIPR;noIPR…	Proteasome assembly chaperone 3;Proteasome assembly chaperone 3;Proteasome assembly chaperone 3;Proteasome assembly chaperone 3;Proteasome assembly chaperone 3;Protein kinase domain;EF-hand domain;EF-hand domain;Tetratricopeptide-like helical domain superfamily;EF-hand domain;Tetratricopeptide-like helical domain superfamily;Tetratricopeptide-like helical domain superfamily;Pentatricopeptide repe…	GO:0004672;GO:0005509;GO:0005524;GO:0016310	protein kinase activity;calcium ion binding;ATP binding;phosphorylation
Dis.W6-48549-006.v1.1AG00080.t1	XP_002454946.1small nuclear ribonucleoprotein E	79			noIPR;IPR001163;IPR001163;noIPR;IPR027078;IPR047575;IPR027078;IPR010920	Nucleobase cation symporter 2 family;Sm domain, eukaryotic/archaea-type;Sm domain, eukaryotic/archaea-type;Sm domain, eukaryotic/archaea-type;Small nuclear ribonucleoprotein E;Sm domain;Small nuclear ribonucleoprotein E;LSM domain superfamily	GO:0000387;GO:0003723;GO:0005682;GO:0005685;GO:0005686;GO:0005687;GO:0034715;GO:0046540;GO:0071011	spliceosomal snRNP assembly;RNA binding;U5 snRNP;U1 snRNP;U2 snRNP;U4 snRNP;pICln-Sm protein complex;U4/U6 x U5 tri-snRNP complex;precatalytic spliceosome
Dis.W6-48549-006.v1.1AG00081.t1	XP_039850290.1Golgi SNAP receptor complex member 1-2-like	311			noIPR;IPR023601	Ribonuclease H-like superfamily;Golgi SNAP receptor complex, subunit 1	GO:0000139;GO:0005484;GO:0005797;GO:0005801;GO:0006888;GO:0006906;GO:0015031;GO:0031201	Golgi membrane;SNAP receptor activity;Golgi medial cisterna;cis-Golgi network;endoplasmic reticulum to Golgi vesicle-mediated transport;vesicle fusion;protein transport;SNARE complex
Dis.W6-48549-006.v1.1AG00082.t1	TVU33554.1hypothetical protein EJB05_25379, partial	368	EC:2.7.7.41	phosphatidate cytidylyltransferase	noIPR;noIPR;IPR000374	Ctr copper transporter;Ctr copper transporter;Phosphatidate cytidylyltransferase	GO:0004605;GO:0016020;GO:0016024	phosphatidate cytidylyltransferase activity;membrane;CDP-diacylglycerol biosynthetic process
Dis.W6-48549-006.v1.1AG00083.t1	TVU33566.1hypothetical protein EJB05_25391	308	EC:2	Transferases	noIPR;IPR011990;IPR039856;IPR011990	Isoprenoid synthase domain superfamily;Tetratricopeptide-like helical domain superfamily;ER membrane protein complex subunit 2-like;Tetratricopeptide-like helical domain superfamily	GO:0009536;GO:0009579;GO:0016740;GO:0072546	plastid;thylakoid;transferase activity;EMC complex
Dis.W6-48549-006.v1.1AG00084.t1	OEL31384.1Pentatricopeptide repeat-containing protein	908			noIPR;IPR011990;IPR011990;IPR002885;IPR011990;IPR002885;IPR002885;IPR011990;noIPR;IPR002885;IPR002885;IPR002885;IPR002885;IPR002885;IPR002885	Lateral organ boundaries, LOB;Tetratricopeptide-like helical domain superfamily;Tetratricopeptide-like helical domain superfamily;Pentatricopeptide repeat;Tetratricopeptide-like helical domain superfamily;Pentatricopeptide repeat;Pentatricopeptide repeat;Tetratricopeptide-like helical domain superfamily;Tetratricopeptide-like helical domain superfamily;Pentatricopeptide repeat;Pentatricopeptide r…	GO:0003729	mRNA binding
Dis.W6-48549-006.v1.1AG00084.t2	RLM80312.1pentatricopeptide repeat-containing protein	697			noIPR;IPR002885;IPR011990;IPR002885;IPR002885;IPR011990;IPR011990;noIPR;IPR002885;IPR002885;IPR002885;IPR002885;IPR002885;IPR002885	Eyes absent family;Pentatricopeptide repeat;Tetratricopeptide-like helical domain superfamily;Pentatricopeptide repeat;Pentatricopeptide repeat;Tetratricopeptide-like helical domain superfamily;Tetratricopeptide-like helical domain superfamily;Tetratricopeptide-like helical domain superfamily;Pentatricopeptide repeat;Pentatricopeptide repeat;Pentatricopeptide repeat;Pentatricopeptide repeat;Penta…	GO:0003729	mRNA binding
Dis.W6-48549-006.v1.1AG00084.t3	KAG2655702.1hypothetical protein PVAP13_1KG032100	521			noIPR;IPR002885;IPR002885;IPR011990;IPR011990;IPR011990;IPR002885;IPR002885;noIPR;IPR002885;IPR002885;IPR002885;IPR002885;IPR002885	Cornichon;Pentatricopeptide repeat;Pentatricopeptide repeat;Tetratricopeptide-like helical domain superfamily;Tetratricopeptide-like helical domain superfamily;Tetratricopeptide-like helical domain superfamily;Pentatricopeptide repeat;Pentatricopeptide repeat;Pentatricopeptide repeat;Pentatricopeptide repeat;Pentatricopeptide repeat;Pentatricopeptide repeat;Pentatricopeptide repeat;Pentatricopept…	GO:0003729	mRNA binding
Dis.W6-48549-006.v1.1AG00084.t4	OEL31384.1Pentatricopeptide repeat-containing protein	640			noIPR;IPR002885;IPR011990;IPR002885;IPR011990;IPR002885;noIPR;IPR002885;IPR002885	Ribulose-phosphate binding barrel;Pentatricopeptide repeat;Tetratricopeptide-like helical domain superfamily;Pentatricopeptide repeat;Tetratricopeptide-like helical domain superfamily;Pentatricopeptide repeat;Pentatricopeptide repeat;Pentatricopeptide repeat;Pentatricopeptide repeat	GO:0003729	mRNA binding
Dis.W6-48549-006.v1.1AG00084.t5	RLM80312.1pentatricopeptide repeat-containing protein	429			noIPR;IPR002885;IPR011990;IPR002885;IPR011990;IPR002885;noIPR;IPR002885;IPR002885;IPR011990	Pectin lyase fold/virulence factor;Pentatricopeptide repeat;Tetratricopeptide-like helical domain superfamily;Pentatricopeptide repeat;Tetratricopeptide-like helical domain superfamily;Pentatricopeptide repeat;Pentatricopeptide repeat;Pentatricopeptide repeat;Pentatricopeptide repeat;Tetratricopeptide-like helical domain superfamily	GO:0003729	mRNA binding
Dis.W6-48549-006.v1.1AG00085.t1	GJN18891.1hypothetical protein PR202_gb06101	159
Dis.W6-48549-006.v1.1AG00086.t1	XP_039788024.1ribose-phosphate pyrophosphokinase 1, chloroplastic	397	EC:2.7.6.1	ribose-phosphate diphosphokinase	noIPR;noIPR;IPR029099;IPR005946;IPR005946;IPR029057;IPR029057;IPR005946;IPR000842;IPR037515;IPR000836;IPR029057	Protein of unknown function DUF674;Protein of unknown function DUF674;Ribose-phosphate pyrophosphokinase, N-terminal domain;Ribose-phosphate pyrophosphokinase;Ribose-phosphate pyrophosphokinase;Phosphoribosyltransferase-like;Phosphoribosyltransferase-like;Ribose-phosphate pyrophosphokinase;Phosphoribosyl pyrophosphate synthetase, conserved site;Ribose-phosphate pyrophosphokinase, bacterial-type;P…	GO:0000287;GO:0002189;GO:0004749;GO:0005524;GO:0005737;GO:0006015;GO:0006164;GO:0009156;GO:0016301;GO:0016310	magnesium ion binding;ribose phosphate diphosphokinase complex;ribose phosphate diphosphokinase activity;ATP binding;cytoplasm;5-phosphoribose 1-diphosphate biosynthetic process;purine nucleotide biosynthetic process;ribonucleoside monophosphate biosynthetic process;kinase activity;phosphorylation
Dis.W6-48549-006.v1.1AG00086.t2	XP_039788024.1ribose-phosphate pyrophosphokinase 1, chloroplastic	353	EC:2.7.6.1	ribose-phosphate diphosphokinase	noIPR;noIPR;IPR005946;IPR029057;IPR029099;IPR029057;IPR005946;IPR005946;IPR000842;IPR000836;IPR029057	Armadillo-type fold;Armadillo-type fold;Ribose-phosphate pyrophosphokinase;Phosphoribosyltransferase-like;Ribose-phosphate pyrophosphokinase, N-terminal domain;Phosphoribosyltransferase-like;Ribose-phosphate pyrophosphokinase;Ribose-phosphate pyrophosphokinase;Phosphoribosyl pyrophosphate synthetase, conserved site;Phosphoribosyltransferase domain;Phosphoribosyltransferase-like	GO:0000287;GO:0002189;GO:0004749;GO:0005524;GO:0005737;GO:0006015;GO:0006164;GO:0009156;GO:0016301;GO:0016310	magnesium ion binding;ribose phosphate diphosphokinase complex;ribose phosphate diphosphokinase activity;ATP binding;cytoplasm;5-phosphoribose 1-diphosphate biosynthetic process;purine nucleotide biosynthetic process;ribonucleoside monophosphate biosynthetic process;kinase activity;phosphorylation
Dis.W6-48549-006.v1.1AG00087.t1	TVU33557.1hypothetical protein EJB05_25382	336			noIPR;noIPR;noIPR;noIPR;noIPR;noIPR	DNA/RNA polymerase superfamily;DNA/RNA polymerase superfamily;DNA/RNA polymerase superfamily;DNA/RNA polymerase superfamily;DNA/RNA polymerase superfamily;DNA/RNA polymerase superfamily
Dis.W6-48549-006.v1.1AG00088.t1	XP_025814625.118.9 kDa heat shock protein-like	193			IPR008978;IPR002068;noIPR;noIPR;noIPR;noIPR;IPR031107;IPR002068;noIPR;IPR008978	HSP20-like chaperone;Alpha crystallin/Hsp20 domain;Alpha crystallin/Hsp20 domain;Alpha crystallin/Hsp20 domain;Alpha crystallin/Hsp20 domain;Alpha crystallin/Hsp20 domain;Small heat shock protein;Alpha crystallin/Hsp20 domain;Alpha crystallin/Hsp20 domain;HSP20-like chaperone	GO:0006457;GO:0009408;GO:0009651;GO:0042542;GO:0043621;GO:0051082;GO:0051259	protein folding;response to heat;response to salt stress;response to hydrogen peroxide;protein self-association;unfolded protein binding;protein complex oligomerization
Dis.W6-48549-006.v1.1AG00089.t1	RLM80902.1uncharacterized protein C2845_PM12G02540	160			noIPR	Pectin lyase fold/virulence factor
Dis.W6-48549-006.v1.1AG00090.t1	GJN18896.1hypothetical protein PR202_gb06107	340			IPR001623;noIPR;noIPR;noIPR;IPR001623;IPR001623;IPR002939;IPR036869;noIPR;noIPR;noIPR;noIPR;noIPR;noIPR;noIPR;IPR018253;IPR001623;IPR001623;noIPR;IPR008971;IPR008971;IPR036869	DnaJ domain;DnaJ domain;DnaJ domain;DnaJ domain;DnaJ domain;DnaJ domain;Chaperone DnaJ, C-terminal;Chaperone J-domain superfamily;Chaperone J-domain superfamily;Chaperone J-domain superfamily;Chaperone J-domain superfamily;Chaperone J-domain superfamily;Chaperone J-domain superfamily;Chaperone J-domain superfamily;Chaperone J-domain superfamily;DnaJ domain, conserved site;DnaJ domain;DnaJ domain;…	GO:0005783;GO:0005829;GO:0051082;GO:0051085;GO:0051087	endoplasmic reticulum;cytosol;unfolded protein binding;chaperone cofactor-dependent protein refolding;protein-folding chaperone binding
Dis.W6-48549-006.v1.1AG00091.t1	TVU33571.1hypothetical protein EJB05_25396	141	EC:3.6.1.15	nucleoside-triphosphate phosphatase	IPR006689;noIPR;noIPR;IPR027417;IPR005225;IPR006689;IPR024156;noIPR;IPR027417	Small GTPase superfamily, ARF/SAR type;Small GTPase superfamily, ARF/SAR type;Small GTPase superfamily, ARF/SAR type;P-loop containing nucleoside triphosphate hydrolase;Small GTP-binding protein domain;Small GTPase superfamily, ARF/SAR type;Small GTPase superfamily, ARF type;Small GTPase superfamily, ARF type;P-loop containing nucleoside triphosphate hydrolase	GO:0003924;GO:0005525;GO:0005794;GO:0006886;GO:0016192	GTPase activity;GTP binding;Golgi apparatus;intracellular protein transport;vesicle-mediated transport
Dis.W6-48549-006.v1.1AG00092.t1	GJM90110.1hypothetical protein PR202_ga06359	75			IPR019835;IPR003121;IPR036885;noIPR;IPR003121;noIPR;IPR036885	SWIB domain;SWIB/MDM2 domain;SWIB/MDM2 domain superfamily;SWIB/MDM2 domain superfamily;SWIB/MDM2 domain;SWIB/MDM2 domain;SWIB/MDM2 domain superfamily	GO:0005634	nucleus
Dis.W6-48549-006.v1.1AG00093.t1	-	180
Dis.W6-48549-006.v1.1AG00094.t1	KAG2655732.1hypothetical protein PVAP13_1KG034400	97	EC:3.2.1	Glycosylases	noIPR;IPR001554;IPR001554;IPR017853	DESIGUAL/Modifying wall lignin-1/2;Glycoside hydrolase, family 14;Glycoside hydrolase, family 14;Glycoside hydrolase superfamily	GO:0004553;GO:0005975	hydrolase activity, hydrolyzing O-glycosyl compounds;carbohydrate metabolic process
Dis.W6-48549-006.v1.1AG00095.t1	GJM90107.1hypothetical protein PR202_ga06356	79			noIPR	Peptidase S8/S53 domain superfamily
Dis.W6-48549-006.v1.1AG00096.t1	-	67			noIPR	At4g08330-like
Dis.W6-48549-006.v1.1AG00097.t1	GJM90108.1hypothetical protein PR202_ga06357	221			noIPR;noIPR;IPR039282	NAD(P)-binding domain superfamily;NAD(P)-binding domain superfamily;Protein response to low sulfur	GO:0098869	cellular oxidant detoxification
Dis.W6-48549-006.v1.1AG00098.t1	TVU33546.1hypothetical protein EJB05_25370, partial	349	EC:3.5.1.2;EC:2	glutaminase;Transferases	noIPR;IPR002161;IPR002161;IPR029062;noIPR;noIPR;IPR002161;IPR021196;noIPR;IPR002161;IPR002161;IPR002161;IPR029062	PRONE domain;Pyridoxal 5'-phosphate synthase subunit PdxT/SNO;Pyridoxal 5'-phosphate synthase subunit PdxT/SNO;Class I glutamine amidotransferase-like;Class I glutamine amidotransferase-like;Class I glutamine amidotransferase-like;Pyridoxal 5'-phosphate synthase subunit PdxT/SNO;PdxT/SNO family, conserved site;PdxT/SNO family, conserved site;Pyridoxal 5'-phosphate synthase subunit PdxT/SNO;Pyrido…	GO:0004359;GO:0005829;GO:0006541;GO:0016740;GO:0042823;GO:0046982	glutaminase activity;cytosol;glutamine metabolic process;transferase activity;pyridoxal phosphate biosynthetic process;protein heterodimerization activity
Dis.W6-48549-006.v1.1AG00099.t1	TVU33543.1hypothetical protein EJB05_25367	543	EC:3.2.1.15	endo-polygalacturonase	noIPR;IPR006626;IPR012334;IPR000743;noIPR;noIPR;noIPR;IPR000743;IPR011050	Afadin/alpha-actinin-binding;Parallel beta-helix repeat;Pectin lyase fold;Glycoside hydrolase, family 28;Glycoside hydrolase, family 28;Glycoside hydrolase, family 28;Glycoside hydrolase, family 28;Glycoside hydrolase, family 28;Pectin lyase fold/virulence factor	GO:0004650;GO:0005975	polygalacturonase activity;carbohydrate metabolic process
Dis.W6-48549-006.v1.1AG00100.t1	XP_039853830.1BOI-related E3 ubiquitin-protein ligase 1-like	493	EC:2.3.2	Acyltransferases	noIPR;noIPR;noIPR;IPR013083;IPR017066;IPR001841;noIPR	Protein of unknown function DUF212;Protein of unknown function DUF212;Protein of unknown function DUF212;Zinc finger, RING/FYVE/PHD-type;E3 ubiquitin-protein ligase BOI-like;Zinc finger, RING-type;Zinc finger, RING-type	GO:0004842;GO:0046872	ubiquitin-protein transferase activity;metal ion binding
Dis.W6-48549-006.v1.1AG00101.t1	TVU33535.1hypothetical protein EJB05_25358, partial	350			noIPR	SET domain superfamily	GO:0016020	membrane
Dis.W6-48549-006.v1.1AG00102.t1	XP_039854896.1beta-glucosidase BoGH3B-like	172	EC:3.2.1	Glycosylases	IPR036881;noIPR;noIPR;noIPR;IPR036881	Glycoside hydrolase family 3 C-terminal domain superfamily;Glycoside hydrolase family 3 C-terminal domain superfamily;Glycoside hydrolase family 3 C-terminal domain superfamily;Glycoside hydrolase family 3 C-terminal domain superfamily;Glycoside hydrolase family 3 C-terminal domain superfamily	GO:0004553;GO:0005576;GO:0005975	hydrolase activity, hydrolyzing O-glycosyl compounds;extracellular region;carbohydrate metabolic process
Dis.W6-48549-006.v1.1AG00103.t1	XP_004952001.1probable ATP synthase 24 kDa subunit, mitochondrial	503			noIPR;IPR031432;IPR031432	Multi antimicrobial extrusion protein DinF-like;MALE GAMETOPHYTE DEFECTIVE 1;MALE GAMETOPHYTE DEFECTIVE 1	GO:0009555	pollen development
Dis.W6-48549-006.v1.1AG00104.t1	XP_039780600.1uncharacterized protein LOC120647833	243			IPR011990;IPR040338	Tetratricopeptide-like helical domain superfamily;Putative F-box protein At1g67623-like
Dis.W6-48549-006.v1.1AG00105.t1	TVU33509.1hypothetical protein EJB05_25332	554			IPR016953;noIPR;noIPR;noIPR	Uncharacterised conserved protein UCP030365;Uncharacterised conserved protein UCP030365;Uncharacterised conserved protein UCP030365;Uncharacterised conserved protein UCP030365
Dis.W6-48549-006.v1.1AG00106.t1	PUZ73949.1hypothetical protein GQ55_1G026900	165			noIPR;noIPR;IPR004827;IPR004827;noIPR;noIPR;noIPR;IPR004827;IPR004827;IPR045314;IPR046347	Homeobox-like domain superfamily;Homeobox-like domain superfamily;Basic-leucine zipper domain;Basic-leucine zipper domain;Basic-leucine zipper domain;Basic-leucine zipper domain;Basic-leucine zipper domain;Basic-leucine zipper domain;Basic-leucine zipper domain;G-box binding factor 1-like, bZIP domain, plant;Basic-leucine zipper domain superfamily	GO:0000976;GO:0003700;GO:0005634;GO:0045893	transcription cis-regulatory region binding;DNA-binding transcription factor activity;nucleus;positive regulation of DNA-templated transcription
Dis.W6-48549-006.v1.1AG00107.t1	-	161
Dis.W6-48549-006.v1.1AG00108.t1	TVU33513.1hypothetical protein EJB05_25336, partial	447			noIPR;noIPR;IPR013763;noIPR;IPR006671;noIPR;noIPR;noIPR;IPR043198;IPR036915;IPR036915	Mad3/Bub1 homology region 1;Mad3/Bub1 homology region 1;Cyclin-like domain;Cyclin-like domain;Cyclin, N-terminal;Cyclin, N-terminal;Cyclin, N-terminal;Cyclin, N-terminal;Cyclin/Cyclin-like subunit Ssn8;Cyclin-like superfamily;Cyclin-like superfamily	GO:0006357;GO:0016538	regulation of transcription by RNA polymerase II;cyclin-dependent protein serine/threonine kinase regulator activity
Dis.W6-48549-006.v1.1AG00109.t1	RLN07641.1phosphatidylinositol/phosphatidylcholine transfer protein SFH6-like	732			noIPR;noIPR;noIPR;noIPR;IPR001251;IPR011074;IPR001251;IPR011074;IPR036865;noIPR;noIPR;noIPR;noIPR;noIPR;IPR001251;IPR001251;IPR036273;IPR036865	WRKY domain superfamily;WRKY domain superfamily;WRKY domain superfamily;WRKY domain superfamily;CRAL-TRIO lipid binding domain;CRAL/TRIO, N-terminal domain;CRAL-TRIO lipid binding domain;CRAL/TRIO, N-terminal domain;CRAL-TRIO lipid binding domain superfamily;CRAL-TRIO lipid binding domain superfamily;CRAL-TRIO lipid binding domain superfamily;CRAL-TRIO lipid binding domain superfamily;CRAL-TRIO l…	GO:0016020	membrane
Dis.W6-48549-006.v1.1AG00110.t1	KAF0925032.1hypothetical protein E2562_015339	83			noIPR	Armadillo-type fold
Dis.W6-48549-006.v1.1AG00111.t1	GJM90131.1hypothetical protein PR202_ga06383	366			IPR001251;IPR001251;IPR036865;noIPR;IPR001251;IPR001251;IPR036865	CRAL-TRIO lipid binding domain;CRAL-TRIO lipid binding domain;CRAL-TRIO lipid binding domain superfamily;CRAL-TRIO lipid binding domain superfamily;CRAL-TRIO lipid binding domain;CRAL-TRIO lipid binding domain;CRAL-TRIO lipid binding domain superfamily
Dis.W6-48549-006.v1.1AG00112.t1	GJN18926.1hypothetical protein PR202_gb06138	305			noIPR;IPR000426;IPR000426;IPR001353;IPR029055;noIPR;noIPR;noIPR;noIPR;IPR000426;IPR023332;IPR035144;IPR029055	WRKY domain superfamily;Proteasome alpha-subunit, N-terminal domain;Proteasome alpha-subunit, N-terminal domain;Proteasome, subunit alpha/beta;Nucleophile aminohydrolases, N-terminal;Nucleophile aminohydrolases, N-terminal;Nucleophile aminohydrolases, N-terminal;Nucleophile aminohydrolases, N-terminal;Nucleophile aminohydrolases, N-terminal;Proteasome alpha-subunit, N-terminal domain;Proteasome a…	GO:0005634;GO:0005737;GO:0006511;GO:0019773	nucleus;cytoplasm;ubiquitin-dependent protein catabolic process;proteasome core complex, alpha-subunit complex
Dis.W6-48549-006.v1.1AG00113.t1	TVU33520.1hypothetical protein EJB05_25343, partial	384	EC:3	Hydrolases	IPR008547;IPR008547;IPR029058	Protein of unknown function DUF829, TMEM53;Protein of unknown function DUF829, TMEM53;Alpha/Beta hydrolase fold	GO:0005640;GO:0016787	nuclear outer membrane;hydrolase activity
Dis.W6-48549-006.v1.1AG00114.t1	RLM80503.1bifunctional coenzyme A synthase	271	EC:2.7.7.3;EC:2.7.1.24	pantetheine-phosphate adenylyltransferase;dephospho-CoA kinase	noIPR;noIPR;IPR004821;IPR004821;IPR014729;noIPR;noIPR;noIPR;noIPR;noIPR	NTF2-like domain superfamily;NTF2-like domain superfamily;Cytidyltransferase-like domain;Cytidyltransferase-like domain;Rossmann-like alpha/beta/alpha sandwich fold;Rossmann-like alpha/beta/alpha sandwich fold;Rossmann-like alpha/beta/alpha sandwich fold;Rossmann-like alpha/beta/alpha sandwich fold;Rossmann-like alpha/beta/alpha sandwich fold;Rossmann-like alpha/beta/alpha sandwich fold	GO:0004140;GO:0004595;GO:0006629;GO:0009651;GO:0019915;GO:0080020	dephospho-CoA kinase activity;pantetheine-phosphate adenylyltransferase activity;lipid metabolic process;response to salt stress;lipid storage;regulation of coenzyme A biosynthetic process
Dis.W6-48549-006.v1.1AG00115.t1	-	68
Dis.W6-48549-006.v1.1AG00116.t1	XP_004951972.1uncharacterized protein LOC101769646	293			IPR012442;noIPR;noIPR;noIPR;noIPR;noIPR;noIPR;noIPR;noIPR	Protein of unknown function DUF1645, plant;Protein of unknown function DUF1645, plant;Protein of unknown function DUF1645, plant;Protein of unknown function DUF1645, plant;Protein of unknown function DUF1645, plant;Protein of unknown function DUF1645, plant;Protein of unknown function DUF1645, plant;Protein of unknown function DUF1645, plant;Protein of unknown function DUF1645, plant
Dis.W6-48549-006.v1.1AG00117.t1	TVU33518.1hypothetical protein EJB05_25341	661	EC:1.4.3.16;EC:1.4.3.21	L-aspartate oxidase;primary-amine oxidase	noIPR;noIPR;IPR015939;IPR027477;IPR036188;IPR003953;IPR005288;noIPR;IPR005288;IPR027477;IPR036188;IPR037099	Arv1 protein;Arv1 protein;Fumarate reductase/succinate dehydrogenase flavoprotein-like, C-terminal;Succinate dehydrogenase/fumarate reductase flavoprotein, catalytic domain superfamily;FAD/NAD(P)-binding domain superfamily;FAD-dependent oxidoreductase 2, FAD binding domain;L-aspartate oxidase;L-aspartate oxidase;L-aspartate oxidase;Succinate dehydrogenase/fumarate reductase flavoprotein, catalyti…	GO:0008734;GO:0009435;GO:0009507;GO:0044318	L-aspartate oxidase activity;NAD biosynthetic process;chloroplast;L-aspartate:fumarate oxidoreductase activity
Dis.W6-48549-006.v1.1AG00118.t1	TVU07529.1hypothetical protein EJB05_40887, partial	429	EC:2.5.1.29	geranylgeranyl diphosphate synthase	noIPR;IPR008949;IPR000092;noIPR;noIPR;IPR033749;IPR033749;IPR000092;IPR008949	Protein kinase-like domain superfamily;Isoprenoid synthase domain superfamily;Polyprenyl synthetase;Polyprenyl synthetase;Polyprenyl synthetase;Polyprenyl synthetase, conserved site;Polyprenyl synthetase, conserved site;Polyprenyl synthetase;Isoprenoid synthase domain superfamily	GO:0004311;GO:0005739;GO:0006744;GO:0008299;GO:0010236;GO:1990234	farnesyltranstransferase activity;mitochondrion;ubiquinone biosynthetic process;isoprenoid biosynthetic process;plastoquinone biosynthetic process;transferase complex
Dis.W6-48549-006.v1.1AG00118.t2	TVU07529.1hypothetical protein EJB05_40887, partial	793	EC:2.5.1.29	geranylgeranyl diphosphate synthase	noIPR;IPR006702;IPR008949;IPR000092;noIPR;noIPR;noIPR;noIPR;noIPR;IPR033749;IPR033749;IPR000092;IPR008949	Pentatricopeptide repeat;Casparian strip membrane protein domain;Isoprenoid synthase domain superfamily;Polyprenyl synthetase;Polyprenyl synthetase;Polyprenyl synthetase;Polyprenyl synthetase;Polyprenyl synthetase;Polyprenyl synthetase;Polyprenyl synthetase, conserved site;Polyprenyl synthetase, conserved site;Polyprenyl synthetase;Isoprenoid synthase domain superfamily	GO:0004311;GO:0005739;GO:0006744;GO:0008299;GO:0010236;GO:1990234	farnesyltranstransferase activity;mitochondrion;ubiquinone biosynthetic process;isoprenoid biosynthetic process;plastoquinone biosynthetic process;transferase complex
Dis.W6-48549-006.v1.1AG00118.t3	GJN18931.1hypothetical protein PR202_gb06143	359			IPR006702;noIPR;noIPR;noIPR;noIPR	Casparian strip membrane protein domain;Casparian strip membrane protein domain;Casparian strip membrane protein domain;Casparian strip membrane protein domain;Casparian strip membrane protein domain	GO:0005886	plasma membrane
Dis.W6-48549-006.v1.1AG00119.t1	PVH65637.1hypothetical protein PAHAL_1G044500	101			noIPR;noIPR	Protein kinase-like domain superfamily;Protein kinase-like domain superfamily
Dis.W6-48549-006.v1.1AG00120.t1	GJM90141.1hypothetical protein PR202_ga06394	562	EC:2.4.2	Glycosyltransferases	noIPR;IPR007657;noIPR;noIPR;IPR007657	Ribonuclease H-like superfamily;Glycosyltransferase 61;Glycosyltransferase 61;Glycosyltransferase 61;Glycosyltransferase 61	GO:0000139;GO:0016763	Golgi membrane;pentosyltransferase activity
Dis.W6-48549-006.v1.1AG00121.t1	GJM90142.1hypothetical protein PR202_ga06395	333			noIPR	Protein GUCD1
Dis.W6-48549-006.v1.1AG00122.t1	GJN18938.1hypothetical protein PR202_gb06150	197			IPR007015;IPR007015	DNA polymerase V/Myb-binding protein 1A;DNA polymerase V/Myb-binding protein 1A	GO:0003677;GO:0005730;GO:0006355	DNA binding;nucleolus;regulation of DNA-templated transcription
Dis.W6-48549-006.v1.1AG00123.t1	TVU33505.1hypothetical protein EJB05_25328	566			IPR013783;IPR007015;IPR032640;noIPR;noIPR;noIPR;noIPR;IPR014756	Immunoglobulin-like fold;DNA polymerase V/Myb-binding protein 1A;AMP-activated protein kinase, glycogen-binding domain;AMP-activated protein kinase, glycogen-binding domain;AMP-activated protein kinase, glycogen-binding domain;AMP-activated protein kinase, glycogen-binding domain;AMP-activated protein kinase, glycogen-binding domain;Immunoglobulin E-set	GO:0009507;GO:0043130	chloroplast;ubiquitin binding
Dis.W6-48549-006.v1.1AG00123.t2	TVU33505.1hypothetical protein EJB05_25328	643			IPR013783;IPR007015;IPR032640;noIPR;noIPR;noIPR;noIPR;IPR014756	Immunoglobulin-like fold;DNA polymerase V/Myb-binding protein 1A;AMP-activated protein kinase, glycogen-binding domain;AMP-activated protein kinase, glycogen-binding domain;AMP-activated protein kinase, glycogen-binding domain;AMP-activated protein kinase, glycogen-binding domain;AMP-activated protein kinase, glycogen-binding domain;Immunoglobulin E-set	GO:0009507;GO:0043130	chloroplast;ubiquitin binding
Dis.W6-48549-006.v1.1AG00124.t1	TVU33496.1hypothetical protein EJB05_25319, partial	752			IPR000270;IPR003035;noIPR;IPR000270;noIPR;noIPR;noIPR;IPR045012;IPR000270;IPR003035;noIPR	PB1 domain;RWP-RK domain;RWP-RK domain;PB1 domain;PB1 domain;PB1 domain;PB1 domain;Protein NLP;PB1 domain;RWP-RK domain;RWP-RK domain	GO:0003677;GO:0003700;GO:0005634;GO:0006355	DNA binding;DNA-binding transcription factor activity;nucleus;regulation of DNA-templated transcription
Dis.W6-48549-006.v1.1AG00124.t2	TVU33496.1hypothetical protein EJB05_25319, partial	744			IPR000270;IPR000270;IPR003035;noIPR;noIPR;noIPR;noIPR;noIPR;noIPR;IPR045012;IPR000270;IPR003035;noIPR	PB1 domain;PB1 domain;RWP-RK domain;RWP-RK domain;RWP-RK domain;RWP-RK domain;RWP-RK domain;RWP-RK domain;RWP-RK domain;Protein NLP;PB1 domain;RWP-RK domain;RWP-RK domain	GO:0003677;GO:0003700;GO:0005634;GO:0006355	DNA binding;DNA-binding transcription factor activity;nucleus;regulation of DNA-templated transcription
Dis.W6-48549-006.v1.1AG00125.t1	KAB8085767.1hypothetical protein EE612_008729, partial	273			noIPR;noIPR;noIPR;noIPR;noIPR	PGG domain;PGG domain;PGG domain;PGG domain;PGG domain
Dis.W6-48549-006.v1.1AG00126.t1	KAJ1277821.1hypothetical protein BS78_04G032400	1244			noIPR;noIPR;noIPR;IPR001680;IPR015943;IPR015943;IPR015943;noIPR;noIPR;noIPR;noIPR;noIPR;IPR039694;IPR036322;IPR036322	Retrotransposon gag domain;Retrotransposon gag domain;Retrotransposon gag domain;WD40 repeat;WD40/YVTN repeat-like-containing domain superfamily;WD40/YVTN repeat-like-containing domain superfamily;WD40/YVTN repeat-like-containing domain superfamily;WD40/YVTN repeat-like-containing domain superfamily;WD40/YVTN repeat-like-containing domain superfamily;WD40/YVTN repeat-like-containing domain superf…	GO:0005737	cytoplasm
Dis.W6-48549-006.v1.1AG00126.t2	KAJ1277821.1hypothetical protein BS78_04G032400	1237			noIPR;noIPR;noIPR;IPR001680;IPR015943;IPR015943;IPR015943;noIPR;noIPR;noIPR;noIPR;noIPR;IPR039694;IPR036322;IPR036322	WD40-repeat-containing domain superfamily;WD40-repeat-containing domain superfamily;WD40-repeat-containing domain superfamily;WD40 repeat;WD40/YVTN repeat-like-containing domain superfamily;WD40/YVTN repeat-like-containing domain superfamily;WD40/YVTN repeat-like-containing domain superfamily;WD40/YVTN repeat-like-containing domain superfamily;WD40/YVTN repeat-like-containing domain superfamily;W…	GO:0005737	cytoplasm
Dis.W6-48549-006.v1.1AG00127.t1	TVU33506.1hypothetical protein EJB05_25329, partial	413			IPR006476;IPR006476;IPR006476	Conserved hypothetical protein CHP01589, plant;Conserved hypothetical protein CHP01589, plant;Conserved hypothetical protein CHP01589, plant
Dis.W6-48549-006.v1.1AG00128.t1	-	71
Dis.W6-48549-006.v1.1AG00129.t1	XP_039775726.150S ribosomal protein L3, chloroplastic-like	209			noIPR;noIPR;IPR000597;IPR019927;noIPR;noIPR;IPR019927;IPR019926;IPR019927;IPR009000	Glycoside hydrolase superfamily;Glycoside hydrolase superfamily;Ribosomal protein L3;Ribosomal protein L3, bacterial/organelle-type;Ribosomal protein L3, bacterial/organelle-type;Ribosomal protein L3, bacterial/organelle-type;Ribosomal protein L3, bacterial/organelle-type;Ribosomal protein L3, conserved site;Ribosomal protein L3, bacterial/organelle-type;Translation protein, beta-barrel domain su…	GO:0003729;GO:0003735;GO:0005840;GO:0006412;GO:1990904	mRNA binding;structural constituent of ribosome;ribosome;translation;ribonucleoprotein complex
Dis.W6-48549-006.v1.1AG00130.t1	-	93			noIPR;noIPR;noIPR;noIPR	Ribonuclease H-like superfamily;Ribonuclease H-like superfamily;Ribonuclease H-like superfamily;Ribonuclease H-like superfamily
Dis.W6-48549-006.v1.1AG00131.t1	-	171			noIPR	Glycoside hydrolase superfamily
Dis.W6-48549-006.v1.1AG00132.t1	TVU33491.1hypothetical protein EJB05_25314	1702	EC:2.3.1.48	histone acetyltransferase	noIPR;noIPR;noIPR;IPR000197;IPR000433;IPR013178;IPR035898;IPR035898;IPR043145;IPR013178;IPR043145;IPR000433;IPR000197;IPR013083;noIPR;noIPR;noIPR;noIPR;noIPR;IPR013178;IPR000433;IPR019786;IPR031162;IPR000197;IPR000433;IPR000433;IPR000197;noIPR;IPR011011;IPR035898;IPR035898;noIPR;noIPR	AMP-binding, conserved site;AMP-binding, conserved site;AMP-binding, conserved site;Zinc finger, TAZ-type;Zinc finger, ZZ-type;Histone acetyltransferase Rtt109/CBP;TAZ domain superfamily;TAZ domain superfamily;Zinc finger, ZZ-type superfamily;Histone acetyltransferase Rtt109/CBP;Zinc finger, ZZ-type superfamily;Zinc finger, ZZ-type;Zinc finger, TAZ-type;Zinc finger, RING/FYVE/PHD-type;Zinc finger…	GO:0000123;GO:0003713;GO:0004402;GO:0005634;GO:0005667;GO:0006338;GO:0008270;GO:0031490;GO:0045944	histone acetyltransferase complex;transcription coactivator activity;histone acetyltransferase activity;nucleus;transcription regulator complex;chromatin remodeling;zinc ion binding;chromatin DNA binding;positive regulation of transcription by RNA polymerase II
Dis.W6-48549-006.v1.1AG00133.t1	-	182			noIPR	Phosphofructokinase superfamily
Dis.W6-48549-006.v1.1AG00134.t1	PUZ73995.1hypothetical protein GQ55_1G030400	429	EC:2.1.1	Transferring one-carbon groups	noIPR;noIPR;IPR029063;IPR002903;IPR023397;IPR002903;IPR002903;IPR002903;IPR023397;IPR029063	HotDog domain superfamily;HotDog domain superfamily;S-adenosyl-L-methionine-dependent methyltransferase superfamily;Ribosomal RNA small subunit methyltransferase H;S-adenosyl-L-methionine-dependent methyltransferase, MraW, recognition domain superfamily;Ribosomal RNA small subunit methyltransferase H;Ribosomal RNA small subunit methyltransferase H;Ribosomal RNA small subunit methyltransferase H;S…	GO:0009507;GO:0070475;GO:0071424	chloroplast;rRNA base methylation;rRNA (cytosine-N4-)-methyltransferase activity
Dis.W6-48549-006.v1.1AG00135.t1	-	73
Dis.W6-48549-006.v1.1AG00136.t1	TVU33492.1hypothetical protein EJB05_25315	151			noIPR;noIPR;IPR015898;noIPR;noIPR;noIPR;noIPR;IPR045878	Cullin repeat-like-containing domain superfamily;Cullin repeat-like-containing domain superfamily;G-protein gamma-like domain;G-protein gamma-like domain;G-protein gamma-like domain;G-protein gamma-like domain;G-protein gamma-like domain;Guanine nucleotide-binding protein subunit gamma 1/2	GO:0005515;GO:0005886;GO:0007186	protein binding;plasma membrane;G protein-coupled receptor signaling pathway
Dis.W6-48549-006.v1.1AG00137.t1	-	106
Dis.W6-48549-006.v1.1AG00138.t1	RLN08264.1ATP-dependent DNA helicase Q-like 4A	1240	EC:3;EC:5.6.2.4	Hydrolases;DNA 3'-5' helicase	noIPR;noIPR;IPR018982;IPR002121;IPR014001;IPR001650;IPR002121;IPR001650;IPR044876;IPR027417;IPR036388;IPR032284;IPR011545;IPR027417;IPR004589;IPR018982;noIPR;noIPR;noIPR;IPR002464;IPR001650;IPR001763;IPR014001;IPR002121;noIPR;noIPR;IPR010997;IPR027417;IPR027417	Protein DCL-like;Protein DCL-like;RQC domain;HRDC domain;Helicase superfamily 1/2, ATP-binding domain;Helicase, C-terminal;HRDC domain;Helicase, C-terminal;HRDC domain superfamily;P-loop containing nucleoside triphosphate hydrolase;Winged helix-like DNA-binding domain superfamily;ATP-dependent DNA helicase RecQ, zinc-binding domain;DEAD/DEAH box helicase domain;P-loop containing nucleoside tripho…	GO:0000724;GO:0003676;GO:0005524;GO:0006260;GO:0016787;GO:0032508;GO:0043138;GO:0070417;GO:0071215	double-strand break repair via homologous recombination;nucleic acid binding;ATP binding;DNA replication;hydrolase activity;DNA duplex unwinding;3'-5' DNA helicase activity;cellular response to cold;cellular response to abscisic acid stimulus
Dis.W6-48549-006.v1.1AG00138.t2	RLN08264.1ATP-dependent DNA helicase Q-like 4A	1245	EC:3;EC:5.6.2.4	Hydrolases;DNA 3'-5' helicase	noIPR;noIPR;IPR014001;IPR018982;IPR001650;IPR002121;IPR027417;IPR001650;IPR002121;IPR018982;IPR027417;IPR036388;IPR032284;IPR004589;IPR044876;IPR011545;noIPR;noIPR;noIPR;IPR002464;IPR002121;IPR001763;IPR014001;IPR001650;noIPR;noIPR;IPR010997;IPR027417;IPR027417	TGS-like;TGS-like;Helicase superfamily 1/2, ATP-binding domain;RQC domain;Helicase, C-terminal;HRDC domain;P-loop containing nucleoside triphosphate hydrolase;Helicase, C-terminal;HRDC domain;RQC domain;P-loop containing nucleoside triphosphate hydrolase;Winged helix-like DNA-binding domain superfamily;ATP-dependent DNA helicase RecQ, zinc-binding domain;DNA helicase, ATP-dependent, RecQ type;HRD…	GO:0000724;GO:0003676;GO:0005524;GO:0006260;GO:0016787;GO:0032508;GO:0043138;GO:0070417;GO:0071215	double-strand break repair via homologous recombination;nucleic acid binding;ATP binding;DNA replication;hydrolase activity;DNA duplex unwinding;3'-5' DNA helicase activity;cellular response to cold;cellular response to abscisic acid stimulus
Dis.W6-48549-006.v1.1AG00139.t1	RLN09430.1hypothetical protein C2845_PM11G14130	735			noIPR;IPR032675;IPR001611;noIPR;noIPR;noIPR;noIPR;noIPR;noIPR;noIPR;noIPR;noIPR;noIPR	Annexin superfamily;Leucine-rich repeat domain superfamily;Leucine-rich repeat;Leucine-rich repeat;Leucine-rich repeat;Leucine-rich repeat;Leucine-rich repeat;Leucine-rich repeat;Leucine-rich repeat;Leucine-rich repeat;Leucine-rich repeat;Leucine-rich repeat;Leucine-rich repeat
Dis.W6-48549-006.v1.1AG00140.t1	ACR35253.1unknown	202			noIPR;noIPR;noIPR	Phospholipase A2 domain superfamily;Phospholipase A2 domain superfamily;Phospholipase A2 domain superfamily
Dis.W6-48549-006.v1.1AG00141.t1	-	78			noIPR	Lysosomal cystine transporter
Dis.W6-48549-006.v1.1AG00142.t1	EES06255.2hypothetical protein SORBI_3004G036400	220			IPR004837;IPR044880;IPR004713	Sodium/calcium exchanger membrane region;NCX, central ion-binding domain superfamily;Calcium/proton exchanger	GO:0006874;GO:0009705;GO:0015369;GO:0070588	intracellular calcium ion homeostasis;plant-type vacuole membrane;calcium:proton antiporter activity;calcium ion transmembrane transport
Dis.W6-48549-006.v1.1AG00143.t1	TVU33486.1hypothetical protein EJB05_25308, partial	305	EC:2.1.1	Transferring one-carbon groups	IPR015310;IPR015310;IPR036338;IPR015310;IPR036338	Activator of Hsp90 ATPase AHSA1-like, N-terminal;Activator of Hsp90 ATPase AHSA1-like, N-terminal;Activator of Hsp90 ATPase, Aha1;Activator of Hsp90 ATPase AHSA1-like, N-terminal;Activator of Hsp90 ATPase, Aha1	GO:0001671;GO:0005829;GO:0006457;GO:0008168;GO:0032259;GO:0051087	ATPase activator activity;cytosol;protein folding;methyltransferase activity;methylation;protein-folding chaperone binding
Dis.W6-48549-006.v1.1AG00143.t2	TVU33486.1hypothetical protein EJB05_25308, partial	305	EC:2.1.1	Transferring one-carbon groups	IPR015310;IPR036338;IPR015310;IPR015310;IPR036338	Activator of Hsp90 ATPase AHSA1-like, N-terminal;Activator of Hsp90 ATPase, Aha1;Activator of Hsp90 ATPase AHSA1-like, N-terminal;Activator of Hsp90 ATPase AHSA1-like, N-terminal;Activator of Hsp90 ATPase, Aha1	GO:0001671;GO:0005829;GO:0006457;GO:0008168;GO:0032259;GO:0051087	ATPase activator activity;cytosol;protein folding;methyltransferase activity;methylation;protein-folding chaperone binding
Dis.W6-48549-006.v1.1AG00144.t1	XP_039788125.1protein arginine N-methyltransferase 5 isoform X1	651	EC:2.1.1	Transferring one-carbon groups	noIPR;noIPR;noIPR;IPR029063;IPR035248;IPR035075;IPR007857;noIPR;noIPR;IPR035247;noIPR;noIPR;noIPR;IPR025799;IPR025799;IPR029063	Protein of unknown function DUF688;Protein of unknown function DUF688;Protein of unknown function DUF688;S-adenosyl-L-methionine-dependent methyltransferase superfamily;PRMT5, oligomerisation domain;PRMT5 arginine-N-methyltransferase;Protein arginine N-methyltransferase PRMT5;Protein arginine N-methyltransferase PRMT5;Protein arginine N-methyltransferase PRMT5;PRMT5, TIM barrel domain;PRMT5, TIM …	GO:0005634;GO:0005829;GO:0006338;GO:0006355;GO:0008469;GO:0032259	nucleus;cytosol;chromatin remodeling;regulation of DNA-templated transcription;histone arginine N-methyltransferase activity;methylation
Dis.W6-48549-006.v1.1AG00145.t1	TVU33479.1hypothetical protein EJB05_25300	489	EC:3.2.1.39	glucan endo-1,3-beta-D-glucosidase	noIPR;noIPR;IPR012946;noIPR;IPR012946;noIPR;IPR000490;IPR044965;IPR000490;IPR017853	Glutathione S-transferase, C-terminal domain superfamily;Glutathione S-transferase, C-terminal domain superfamily;X8 domain;X8 domain;X8 domain;X8 domain;Glycoside hydrolase family 17;Glycoside hydrolase family 17, plant;Glycoside hydrolase family 17;Glycoside hydrolase superfamily	GO:0005975;GO:0016020;GO:0042973	carbohydrate metabolic process;membrane;glucan endo-1,3-beta-D-glucosidase activity
Dis.W6-48549-006.v1.1AG00146.t1	GJN18965.1hypothetical protein PR202_gb06187	523	EC:6.1.1.12	aspartate--tRNA ligase	IPR002312;noIPR;IPR004365;IPR004364;IPR012340;IPR004523;IPR045864;IPR004523;IPR006195;IPR004523;noIPR;noIPR;IPR045864;IPR012340	Aspartyl/Asparaginyl-tRNA synthetase, class IIb;Aspartyl/Asparaginyl-tRNA synthetase, class IIb;OB-fold nucleic acid binding domain, AA-tRNA synthetase-type;Aminoacyl-tRNA synthetase, class II (D/K/N);Nucleic acid-binding, OB-fold;Aspartate-tRNA synthetase, type 2;Class II Aminoacyl-tRNA synthetase/Biotinyl protein ligase (BPL) and lipoyl protein ligase (LPL);Aspartate-tRNA synthetase, type 2;Ami…	GO:0003723;GO:0004815;GO:0005524;GO:0005829;GO:0006422;GO:0017101	RNA binding;aspartate-tRNA ligase activity;ATP binding;cytosol;aspartyl-tRNA aminoacylation;aminoacyl-tRNA synthetase multienzyme complex
Dis.W6-48549-006.v1.1AG00147.t1	GJM90177.1hypothetical protein PR202_ga06434	254			noIPR;IPR018333;IPR008930	Late embryogenesis abundant protein, LEA_2 subgroup;Squalene cyclase;Terpenoid cyclases/protein prenyltransferase alpha-alpha toroid
Dis.W6-48549-006.v1.1AG00147.t2	CAB3445555.1unnamed protein product	410			IPR032696;noIPR;IPR018333;IPR008930	Squalene cyclase, C-terminal;Squalene cyclase, C-terminal;Squalene cyclase;Terpenoid cyclases/protein prenyltransferase alpha-alpha toroid
Dis.W6-48549-006.v1.1AG00148.t1	-	89			noIPR	DNA/RNA polymerase superfamily
Dis.W6-48549-006.v1.1AG00149.t1	GJN18973.1hypothetical protein PR202_gb06196	326			noIPR;noIPR;noIPR;noIPR;noIPR	Retrotransposon gag domain;Retrotransposon gag domain;Retrotransposon gag domain;Retrotransposon gag domain;Retrotransposon gag domain
Dis.W6-48549-006.v1.1AG00150.t1	GJM90182.1hypothetical protein PR202_ga06439	195			noIPR;noIPR;noIPR;noIPR;IPR045038;IPR013024;IPR036568	Peptide-N4-(N-acetyl-beta-glucosaminyl)asparagine amidase A;Peptide-N4-(N-acetyl-beta-glucosaminyl)asparagine amidase A;Peptide-N4-(N-acetyl-beta-glucosaminyl)asparagine amidase A;Peptide-N4-(N-acetyl-beta-glucosaminyl)asparagine amidase A;Protein AIG2-like;Gamma-glutamyl cyclotransferase-like;Gamma-glutamyl cyclotransferase-like superfamily
Dis.W6-48549-006.v1.1AG00151.t1	XP_004951920.1auxin response factor 5	942			noIPR;noIPR;noIPR;IPR003340;IPR003340;IPR010525;IPR015300;noIPR;noIPR;noIPR;noIPR;IPR044835;IPR003340;IPR003340;IPR015300	Homeobox-like domain superfamily;Homeobox-like domain superfamily;Homeobox-like domain superfamily;B3 DNA binding domain;B3 DNA binding domain;Auxin response factor domain;DNA-binding pseudobarrel domain superfamily;DNA-binding pseudobarrel domain superfamily;DNA-binding pseudobarrel domain superfamily;DNA-binding pseudobarrel domain superfamily;DNA-binding pseudobarrel domain superfamily;Auxin r…	GO:0003677;GO:0005634;GO:0006355;GO:0009734	DNA binding;nucleus;regulation of DNA-templated transcription;auxin-activated signaling pathway
Dis.W6-48549-006.v1.1AG00152.t1	XP_034607281.1L-arabinokinase	990	EC:2.7.1.6;EC:2.7.1.46	galactokinase;L-arabinokinase	noIPR;noIPR;noIPR;noIPR;noIPR;IPR012369;noIPR;IPR036554;IPR013750;noIPR;IPR019539;noIPR;IPR014721;IPR006204;noIPR;IPR020568;IPR036554;noIPR	QWRF family;QWRF family;QWRF family;QWRF family;QWRF family;Galactokinase, glycosyltransferase;Galactokinase, glycosyltransferase;GHMP kinase, C-terminal domain superfamily;GHMP kinase, C-terminal domain;GHMP kinase, C-terminal domain;Galactokinase, N-terminal domain;Galactokinase, N-terminal domain;Ribosomal protein S5 domain 2-type fold, subgroup;GHMP kinase N-terminal domain;GHMP kinase N-term…	GO:0004335;GO:0005524;GO:0005829;GO:0006012;GO:0009702;GO:0046835	galactokinase activity;ATP binding;cytosol;galactose metabolic process;L-arabinokinase activity;carbohydrate phosphorylation
Dis.W6-48549-006.v1.1AG00153.t1	GJN18977.1hypothetical protein PR202_gb06200	258			noIPR	WD40-repeat-containing domain superfamily
Dis.W6-48549-006.v1.1AG00154.t1	GJN18984.1hypothetical protein PR202_gb06209	515	EC:3.6.4.13	RNA helicase	noIPR;noIPR;IPR001650;IPR014001;IPR027417;IPR027417;IPR011545;IPR001650;noIPR;noIPR;IPR000629;IPR014014;IPR001650;IPR014001;noIPR;noIPR;IPR027417	Nucleotide-diphospho-sugar transferases;Nucleotide-diphospho-sugar transferases;Helicase, C-terminal;Helicase superfamily 1/2, ATP-binding domain;P-loop containing nucleoside triphosphate hydrolase;P-loop containing nucleoside triphosphate hydrolase;DEAD/DEAH box helicase domain;Helicase, C-terminal;Helicase, C-terminal;Helicase, C-terminal;ATP-dependent RNA helicase DEAD-box, conserved site;RNA …	GO:0002183;GO:0003723;GO:0003724;GO:0003743;GO:0005524;GO:0005634;GO:0010494;GO:0016787	cytoplasmic translational initiation;RNA binding;RNA helicase activity;translation initiation factor activity;ATP binding;nucleus;cytoplasmic stress granule;hydrolase activity
Dis.W6-48549-006.v1.1AG00155.t1	XP_025798806.1UDP-glycosyltransferase 72B1-like	458	EC:2.4	Glycosyltransferases	noIPR;noIPR;noIPR;IPR002213;noIPR;noIPR;IPR035595;IPR002213;noIPR	EPIDERMAL PATTERNING FACTOR-like protein;EPIDERMAL PATTERNING FACTOR-like protein;EPIDERMAL PATTERNING FACTOR-like protein;UDP-glucuronosyl/UDP-glucosyltransferase;UDP-glucuronosyl/UDP-glucosyltransferase;UDP-glucuronosyl/UDP-glucosyltransferase;UDP-glycosyltransferase family, conserved site;UDP-glucuronosyl/UDP-glucosyltransferase;UDP-glucuronosyl/UDP-glucosyltransferase	GO:0008194	UDP-glycosyltransferase activity
Dis.W6-48549-006.v1.1AG00155.t2	XP_025798806.1UDP-glycosyltransferase 72B1-like	280	EC:2.4	Glycosyltransferases	noIPR;noIPR;IPR002213;noIPR;noIPR;IPR035595;IPR002213;noIPR	P-loop containing nucleoside triphosphate hydrolase;P-loop containing nucleoside triphosphate hydrolase;UDP-glucuronosyl/UDP-glucosyltransferase;UDP-glucuronosyl/UDP-glucosyltransferase;UDP-glucuronosyl/UDP-glucosyltransferase;UDP-glycosyltransferase family, conserved site;UDP-glucuronosyl/UDP-glucosyltransferase;UDP-glucuronosyl/UDP-glucosyltransferase	GO:0008194	UDP-glycosyltransferase activity
Dis.W6-48549-006.v1.1AG00156.t1	-	129			noIPR;noIPR;noIPR;noIPR;noIPR	Papain-like cysteine peptidase superfamily;Papain-like cysteine peptidase superfamily;Papain-like cysteine peptidase superfamily;Papain-like cysteine peptidase superfamily;Papain-like cysteine peptidase superfamily
Dis.W6-48549-006.v1.1AG00157.t1	TVU33467.1hypothetical protein EJB05_25287	893			IPR001965;IPR001356;IPR013083;IPR019787;noIPR;IPR001356;noIPR;noIPR;noIPR;noIPR;noIPR;noIPR;IPR019786;IPR001356;IPR019787;IPR001356;IPR011011;IPR009057	Zinc finger, PHD-type;Homeobox domain;Zinc finger, RING/FYVE/PHD-type;Zinc finger, PHD-finger;Zinc finger, PHD-finger;Homeobox domain;Homeobox domain;Homeobox domain;Homeobox domain;Homeobox domain;Homeobox domain;Homeobox domain;Zinc finger, PHD-type, conserved site;Homeobox domain;Zinc finger, PHD-finger;Homeobox domain;Zinc finger, FYVE/PHD-type;Homeobox-like domain superfamily	GO:0003690;GO:0005634;GO:0009330;GO:0042023;GO:0046872	double-stranded DNA binding;nucleus;DNA topoisomerase type II (double strand cut, ATP-hydrolyzing) complex;DNA endoreduplication;metal ion binding
Dis.W6-48549-006.v1.1AG00157.t2	TVU33467.1hypothetical protein EJB05_25287	2173			IPR001356;IPR001965;IPR041433;IPR013083;IPR001356;noIPR;IPR040892;IPR019787;IPR002015;IPR011989;noIPR;noIPR;noIPR;noIPR;noIPR;noIPR;noIPR;noIPR;noIPR;noIPR;noIPR;noIPR;noIPR;noIPR;noIPR;noIPR;noIPR;noIPR;IPR019786;IPR001356;IPR019787;IPR001356;IPR009057;IPR011011;IPR016024	Homeobox domain;Zinc finger, PHD-type;26S proteasome non-ATPase regulatory subunit RPN1, C-terminal;Zinc finger, RING/FYVE/PHD-type;Homeobox domain;Homeobox domain;RPN1, N-terminal;Zinc finger, PHD-finger;Proteasome/cyclosome repeat;Armadillo-like helical;Armadillo-like helical;Armadillo-like helical;Armadillo-like helical;Armadillo-like helical;Armadillo-like helical;Armadillo-like helical;Armad…	GO:0005488;GO:0005634;GO:0008540;GO:0030234;GO:0034515;GO:0042176;GO:0043161	binding;nucleus;proteasome regulatory particle, base subcomplex;enzyme regulator activity;proteasome storage granule;regulation of protein catabolic process;proteasome-mediated ubiquitin-dependent protein catabolic process
Dis.W6-48549-006.v1.1AG00157.t3	TVU33463.1hypothetical protein EJB05_25283, partial	1411			IPR040892;IPR041433;IPR011989;IPR002015;noIPR;noIPR;noIPR;noIPR;noIPR;noIPR;noIPR;noIPR;noIPR;noIPR;noIPR;noIPR;noIPR;noIPR;noIPR;IPR016024	RPN1, N-terminal;26S proteasome non-ATPase regulatory subunit RPN1, C-terminal;Armadillo-like helical;Proteasome/cyclosome repeat;Proteasome/cyclosome repeat;Proteasome/cyclosome repeat;Proteasome/cyclosome repeat;Proteasome/cyclosome repeat;Proteasome/cyclosome repeat;Proteasome/cyclosome repeat;Proteasome/cyclosome repeat;Proteasome/cyclosome repeat;Proteasome/cyclosome repeat;Proteasome/cyclos…	GO:0000245;GO:0003729;GO:0005681;GO:0008540;GO:0030234;GO:0034515;GO:0042176;GO:0043161	spliceosomal complex assembly;mRNA binding;spliceosomal complex;proteasome regulatory particle, base subcomplex;enzyme regulator activity;proteasome storage granule;regulation of protein catabolic process;proteasome-mediated ubiquitin-dependent protein catabolic process
Dis.W6-48549-006.v1.1AG00157.t4	TVU33463.1hypothetical protein EJB05_25283, partial	1386			IPR002015;IPR041433;IPR040892;IPR011989;noIPR;noIPR;noIPR;noIPR;noIPR;noIPR;noIPR;noIPR;noIPR;noIPR;noIPR;noIPR;noIPR;noIPR;IPR016024	Proteasome/cyclosome repeat;26S proteasome non-ATPase regulatory subunit RPN1, C-terminal;RPN1, N-terminal;Armadillo-like helical;Armadillo-like helical;Armadillo-like helical;Armadillo-like helical;Armadillo-like helical;Armadillo-like helical;Armadillo-like helical;Armadillo-like helical;Armadillo-like helical;Armadillo-like helical;Armadillo-like helical;Armadillo-like helical;Armadillo-like h…	GO:0000245;GO:0003729;GO:0005681;GO:0008540;GO:0030234;GO:0034515;GO:0042176;GO:0043161	spliceosomal complex assembly;mRNA binding;spliceosomal complex;proteasome regulatory particle, base subcomplex;enzyme regulator activity;proteasome storage granule;regulation of protein catabolic process;proteasome-mediated ubiquitin-dependent protein catabolic process
Dis.W6-48549-006.v1.1AG00158.t1	PUZ74051.1hypothetical protein GQ55_1G034100	468			IPR010402;noIPR;noIPR;noIPR;IPR010402	CCT domain;CCT domain;CCT domain;CCT domain;CCT domain	GO:0005634;GO:0006355	nucleus;regulation of DNA-templated transcription
Dis.W6-48549-006.v1.1AG00159.t1	TVU33453.1hypothetical protein EJB05_25271, partial	734			IPR021933;IPR007042;noIPR;noIPR;noIPR;noIPR;noIPR;noIPR;IPR039727;IPR013087	SERRATE/Ars2, N-terminal;SERRATE/Ars2 , C-terminal;SERRATE/Ars2 , C-terminal;SERRATE/Ars2 , C-terminal;SERRATE/Ars2 , C-terminal;SERRATE/Ars2 , C-terminal;SERRATE/Ars2 , C-terminal;SERRATE/Ars2 , C-terminal;SERRATE/Ars2;Zinc finger C2H2-type	GO:0005634;GO:0006397	nucleus;mRNA processing
Dis.W6-48549-006.v1.1AG00160.t1	GJM90204.1hypothetical protein PR202_ga06462	444			noIPR;noIPR;noIPR;IPR003307;IPR002735;noIPR;noIPR;IPR002735;IPR003307;noIPR;noIPR;noIPR;IPR045196;IPR003307;noIPR;IPR016024;IPR016190;IPR016189	LNK family;LNK family;LNK family;W2 domain;Translation initiation factor IF2/IF5 domain;Translation initiation factor IF2/IF5 domain;Translation initiation factor IF2/IF5 domain;Translation initiation factor IF2/IF5 domain;W2 domain;W2 domain;W2 domain;W2 domain;Translation initiation factor IF2/IF5;W2 domain;W2 domain;Armadillo-type fold;Translation initiation factor IF2/IF5, zinc-binding;Transl…	GO:0001731;GO:0001732;GO:0003743;GO:0005092;GO:0005525;GO:0005829;GO:0071074	formation of translation preinitiation complex;formation of cytoplasmic translation initiation complex;translation initiation factor activity;GDP-dissociation inhibitor activity;GTP binding;cytosol;eukaryotic initiation factor eIF2 binding
Dis.W6-48549-006.v1.1AG00161.t1	-	106
Dis.W6-48549-006.v1.1AG00162.t1	-	68
Dis.W6-48549-006.v1.1AG00163.t1	-	70
Dis.W6-48549-006.v1.1AG00164.t1	GJM90207.1hypothetical protein PR202_ga06465	439	EC:3.1.3.16	protein-serine/threonine phosphatase	noIPR;IPR001932;IPR001932;IPR001932;IPR036457;noIPR;noIPR;noIPR;IPR015655;IPR000222;IPR001932;IPR001932;IPR036457	RmlC-like cupin domain superfamily;PPM-type phosphatase-like domain;PPM-type phosphatase-like domain;PPM-type phosphatase-like domain;PPM-type phosphatase-like domain superfamily;PPM-type phosphatase-like domain superfamily;PPM-type phosphatase-like domain superfamily;PPM-type phosphatase-like domain superfamily;Protein phosphatase 2C family;PPM-type phosphatase, divalent cation binding;PPM-type …	GO:0016020;GO:0017018;GO:0046872	membrane;myosin phosphatase activity;metal ion binding
Dis.W6-48549-006.v1.1AG00165.t1	TVU33449.1hypothetical protein EJB05_25266, partial	133			noIPR	PPC domain
Dis.W6-48549-006.v1.1AG00165.t2	TVU33450.1hypothetical protein EJB05_25268, partial	442			noIPR;noIPR;noIPR	Ribonuclease H-like superfamily;Ribonuclease H-like superfamily;Ribonuclease H-like superfamily
Dis.W6-48549-006.v1.1AG00166.t1	TVU33452.1hypothetical protein EJB05_25270, partial	229			noIPR;IPR000047;IPR001356;IPR003106;IPR003106;noIPR;IPR001356;noIPR;noIPR;noIPR;noIPR;noIPR;IPR017970;IPR001356;IPR001356;IPR009057	Protein kinase-like domain superfamily;Helix-turn-helix motif;Homeobox domain;Leucine zipper, homeobox-associated;Leucine zipper, homeobox-associated;Leucine zipper, homeobox-associated;Homeobox domain;Homeobox domain;Homeobox domain;Homeobox domain;Homeobox domain;Homeobox domain;Homeobox, conserved site;Homeobox domain;Homeobox domain;Homeobox-like domain superfamily	GO:0000981;GO:0005634;GO:0006357;GO:0043565	DNA-binding transcription factor activity, RNA polymerase II-specific;nucleus;regulation of transcription by RNA polymerase II;sequence-specific DNA binding
Dis.W6-48549-006.v1.1AG00167.t1	CAD6248086.1unnamed protein product	91			noIPR;noIPR	Nse4/EID family;Nse4/EID family
Dis.W6-48549-006.v1.1AG00168.t1	TVU33429.1hypothetical protein EJB05_25246	612	EC:3.6.4.13	RNA helicase	noIPR;noIPR;noIPR;IPR014001;IPR001650;IPR011545;IPR027417;IPR027417;IPR001650;noIPR;noIPR;noIPR;noIPR;noIPR;IPR014001;IPR001650;IPR001878;IPR014014;IPR044113;noIPR;IPR027417	S-adenosyl-L-methionine-dependent methyltransferase superfamily;S-adenosyl-L-methionine-dependent methyltransferase superfamily;S-adenosyl-L-methionine-dependent methyltransferase superfamily;Helicase superfamily 1/2, ATP-binding domain;Helicase, C-terminal;DEAD/DEAH box helicase domain;P-loop containing nucleoside triphosphate hydrolase;P-loop containing nucleoside triphosphate hydrolase;Helicas…	GO:0000398;GO:0003723;GO:0003724;GO:0005524;GO:0005681;GO:0008270;GO:0016787	mRNA splicing, via spliceosome;RNA binding;RNA helicase activity;ATP binding;spliceosomal complex;zinc ion binding;hydrolase activity
Dis.W6-48549-006.v1.1AG00169.t1	TVU33432.1hypothetical protein EJB05_25249	318			noIPR;IPR012417;noIPR;noIPR;noIPR;noIPR;noIPR	Arabinogalactan protein 3/12/13/14/21;Calmodulin-binding domain, plant;Calmodulin-binding domain, plant;Calmodulin-binding domain, plant;Calmodulin-binding domain, plant;Calmodulin-binding domain, plant;Calmodulin-binding domain, plant	GO:0005516	calmodulin binding
Dis.W6-48549-006.v1.1AG00170.t1	TVU33441.1hypothetical protein EJB05_25258	412	EC:1.5.5.1	electron-transferring-flavoprotein dehydrogenase	noIPR;noIPR;IPR023753;noIPR;noIPR;noIPR;IPR036188	P-loop containing nucleoside triphosphate hydrolase;P-loop containing nucleoside triphosphate hydrolase;FAD/NAD(P)-binding domain;FAD/NAD(P)-binding domain;FAD/NAD(P)-binding domain;FAD/NAD(P)-binding domain;FAD/NAD(P)-binding domain superfamily	GO:0004174;GO:0005737;GO:0022904;GO:0050660	electron-transferring-flavoprotein dehydrogenase activity;cytoplasm;respiratory electron transport chain;flavin adenine dinucleotide binding
Dis.W6-48549-006.v1.1AG00171.t1	-	67
Dis.W6-48549-006.v1.1AG00172.t1	GJN19011.1hypothetical protein PR202_gb06238	611			noIPR;noIPR;noIPR;noIPR;IPR000014;noIPR;IPR015915;IPR000014;IPR001810;IPR015915;noIPR;noIPR;noIPR;noIPR;noIPR;noIPR;IPR001810;IPR000014;IPR000014;noIPR;IPR036047;IPR015915;IPR035965	Cyclophilin-like domain superfamily;Cyclophilin-like domain superfamily;Cyclophilin-like domain superfamily;Cyclophilin-like domain superfamily;PAS domain;PAS domain;Kelch-type beta propeller;PAS domain;F-box domain;Kelch-type beta propeller;Kelch-type beta propeller;Kelch-type beta propeller;Kelch-type beta propeller;Kelch-type beta propeller;Kelch-type beta propeller;Kelch-type beta propeller;F…	GO:0005634;GO:0005829;GO:0007623;GO:0009637;GO:0009881;GO:0016567;GO:0019005	nucleus;cytosol;circadian rhythm;response to blue light;photoreceptor activity;protein ubiquitination;SCF ubiquitin ligase complex
Dis.W6-48549-006.v1.1AG00173.t1	TVU33430.1hypothetical protein EJB05_25247	373			IPR013083;IPR012866;noIPR;noIPR;IPR013087	Zinc finger, RING/FYVE/PHD-type;Protein of unknown function DUF1644;Protein of unknown function DUF1644;Protein of unknown function DUF1644;Zinc finger C2H2-type	GO:0016020	membrane
Dis.W6-48549-006.v1.1AG00174.t1	PUZ74079.1hypothetical protein GQ55_1G036100	517	EC:3.2.1.4	cellulase	noIPR;IPR012341;IPR001701;noIPR;IPR018221;IPR008928	Nucleotide-diphospho-sugar transferases;Six-hairpin glycosidase-like superfamily;Glycoside hydrolase family 9;Glycoside hydrolase family 9;Glycoside hydrolase family 9, His active site;Six-hairpin glycosidase superfamily	GO:0008810;GO:0030245	cellulase activity;cellulose catabolic process
Dis.W6-48549-006.v1.1AG00175.t1	GJM90221.1hypothetical protein PR202_ga06479	833	EC:2.7.1	Transferring phosphorus-containing groups	IPR000719;noIPR;noIPR;IPR006016;IPR001245;IPR014729;noIPR;noIPR;noIPR;noIPR;noIPR;noIPR;noIPR;noIPR;noIPR;noIPR;noIPR;noIPR;noIPR;noIPR;noIPR;noIPR;noIPR;noIPR;noIPR;noIPR;noIPR;noIPR;noIPR;noIPR;noIPR;noIPR;noIPR;noIPR;noIPR;noIPR;noIPR;noIPR;noIPR;noIPR;noIPR;noIPR;noIPR;noIPR;noIPR;noIPR;noIPR;noIPR;noIPR;noIPR;noIPR;noIPR;noIPR;noIPR;noIPR;noIPR;noIPR;noIPR;noIPR;noIPR;noIPR;noIPR;noIPR;noIPR…	Protein kinase domain;Protein kinase domain;Protein kinase domain;UspA;Serine-threonine/tyrosine-protein kinase, catalytic domain;Rossmann-like alpha/beta/alpha sandwich fold;Rossmann-like alpha/beta/alpha sandwich fold;Rossmann-like alpha/beta/alpha sandwich fold;Rossmann-like alpha/beta/alpha sandwich fold;Rossmann-like alpha/beta/alpha sandwich fold;Rossmann-like alpha/beta/alpha sandwich fold…	GO:0004672;GO:0005524;GO:0009536;GO:0015977;GO:0015979	protein kinase activity;ATP binding;plastid;carbon fixation;photosynthesis
Dis.W6-48549-006.v1.1AG00176.t1	-	68
Dis.W6-48549-006.v1.1AG00177.t1	TVU33433.1hypothetical protein EJB05_25250	744			IPR032881;noIPR;noIPR;noIPR;noIPR;noIPR;noIPR;noIPR;noIPR;IPR044514;IPR003961;IPR003961;IPR036116	Oberon-like, PHD finger domain;Oberon-like, PHD finger domain;Oberon-like, PHD finger domain;Oberon-like, PHD finger domain;Oberon-like, PHD finger domain;Oberon-like, PHD finger domain;Oberon-like, PHD finger domain;Oberon-like, PHD finger domain;Oberon-like, PHD finger domain;Vernalization insensitive 3-like;Fibronectin type III;Fibronectin type III;Fibronectin type III superfamily	GO:0005634;GO:0010048;GO:0040029	nucleus;vernalization response;epigenetic regulation of gene expression
Dis.W6-48549-006.v1.1AG00178.t1	KAJ1277932.1hypothetical protein BS78_04G040400	1848	EC:2.7.7.6	DNA-directed RNA polymerase	noIPR;IPR006592;IPR007081;noIPR;noIPR;noIPR;IPR042102;noIPR;noIPR;IPR007066;noIPR;noIPR;noIPR;noIPR;noIPR;noIPR;noIPR;noIPR;noIPR;noIPR;noIPR;noIPR;noIPR;noIPR;noIPR;noIPR;noIPR;noIPR;noIPR;IPR045867;IPR040402;noIPR	Zinc finger, CCHC-type;RNA polymerase, N-terminal;RNA polymerase Rpb1, domain 5;RNA polymerase Rpb1, domain 5;RNA polymerase Rpb1, domain 5;RNA polymerase Rpb1, domain 5;RNA polymerase Rpb1, domain 3 superfamily;RNA polymerase Rpb1, domain 3 superfamily;RNA polymerase Rpb1, domain 3 superfamily;RNA polymerase Rpb1, domain 3;RNA polymerase Rpb1, domain 3;RNA polymerase Rpb1, domain 3;RNA polymeras…	GO:0001055;GO:0005488;GO:0005665;GO:0006351	RNA polymerase II activity;binding;RNA polymerase II, core complex;DNA-templated transcription
Dis.W6-48549-006.v1.1AG00178.t2	KAJ1277932.1hypothetical protein BS78_04G040400	936	EC:2.7.7.6	DNA-directed RNA polymerase	noIPR;IPR006592;IPR007081;IPR044893;IPR007080;noIPR;noIPR;noIPR;IPR042102;IPR007066;IPR045867;noIPR	Kelch-type beta propeller;RNA polymerase, N-terminal;RNA polymerase Rpb1, domain 5;RNA polymerase Rpb1, clamp domain superfamily;RNA polymerase Rpb1, domain 1;RNA polymerase Rpb1, domain 1;RNA polymerase Rpb1, domain 1;RNA polymerase Rpb1, domain 1;RNA polymerase Rpb1, domain 3 superfamily;RNA polymerase Rpb1, domain 3;DNA-directed RNA polymerase, subunit beta-prime;DNA-directed RNA polymerase, s…	GO:0001055;GO:0003677;GO:0005665;GO:0006366;GO:0009536;GO:0016020;GO:0046872	RNA polymerase II activity;DNA binding;RNA polymerase II, core complex;transcription by RNA polymerase II;plastid;membrane;metal ion binding
Dis.W6-48549-006.v1.1AG00179.t1	-	140			noIPR;noIPR;noIPR;noIPR;noIPR	Nucleic acid-binding, OB-fold;Nucleic acid-binding, OB-fold;Nucleic acid-binding, OB-fold;Nucleic acid-binding, OB-fold;Nucleic acid-binding, OB-fold
Dis.W6-48549-006.v1.1AG00180.t1	TVU33411.1hypothetical protein EJB05_25227	219			noIPR;IPR040299	Protein EXORDIUM-like;Protein FERTILITY RESTORER RF2-like	GO:0005515;GO:0009507;GO:0010027;GO:0033614	protein binding;chloroplast;thylakoid membrane organization;chloroplast proton-transporting ATP synthase complex assembly
Dis.W6-48549-006.v1.1AG00181.t1	TVU33422.1hypothetical protein EJB05_25239, partial	668			noIPR;noIPR;IPR006869;IPR025757;noIPR;noIPR;noIPR	Helix-loop-helix DNA-binding domain superfamily;Helix-loop-helix DNA-binding domain superfamily;Domain of unknown function DUF547;Ternary complex factor MIP1, leucine-zipper;Ternary complex factor MIP1, leucine-zipper;Ternary complex factor MIP1, leucine-zipper;Ternary complex factor MIP1, leucine-zipper
Dis.W6-48549-006.v1.1AG00182.t1	XP_022684522.1tyrosine-sulfated glycopeptide receptor 1	1032	EC:2.7.1	Transferring phosphorus-containing groups	noIPR;noIPR;noIPR;noIPR;noIPR;noIPR;noIPR;IPR000719;IPR003591;IPR032675;IPR013210;noIPR;IPR001611;noIPR;IPR032675;IPR001611;IPR000719;noIPR;noIPR;noIPR;noIPR;noIPR;noIPR;noIPR;noIPR;noIPR;noIPR;noIPR;noIPR;noIPR;noIPR;noIPR;noIPR;noIPR;noIPR;noIPR;noIPR;noIPR;noIPR;noIPR;noIPR;noIPR;noIPR;noIPR;noIPR;noIPR;noIPR;noIPR;noIPR;noIPR;noIPR;noIPR;noIPR;noIPR;noIPR;noIPR;noIPR;noIPR;noIPR;noIPR;noIPR;n…	Cyclophilin-like domain superfamily;Cyclophilin-like domain superfamily;Cyclophilin-like domain superfamily;Cyclophilin-like domain superfamily;Cyclophilin-like domain superfamily;Cyclophilin-like domain superfamily;Cyclophilin-like domain superfamily;Protein kinase domain;Leucine-rich repeat, typical subtype;Leucine-rich repeat domain superfamily;Leucine-rich repeat-containing N-terminal, plant-…	GO:0004672;GO:0005524;GO:0016020;GO:0016310	protein kinase activity;ATP binding;membrane;phosphorylation
Dis.W6-48549-006.v1.1AG00183.t1	TVU33412.1hypothetical protein EJB05_25228, partial	875	EC:2.7	Transferring phosphorus-containing groups	noIPR;noIPR;noIPR;noIPR;noIPR;IPR000719;IPR003591;IPR032675;IPR032675;IPR032675;noIPR;noIPR;IPR032675;IPR001611;IPR013210;IPR001611;IPR001611;IPR001245;noIPR;noIPR;noIPR;noIPR;noIPR;noIPR;noIPR;noIPR;noIPR;noIPR;noIPR;noIPR;noIPR;noIPR;noIPR;noIPR;noIPR;noIPR;noIPR;noIPR;noIPR;noIPR;noIPR;noIPR;noIPR;noIPR;noIPR;noIPR;noIPR;noIPR;noIPR;noIPR;noIPR;noIPR;noIPR;noIPR;noIPR;noIPR;noIPR;noIPR;noIPR;n…	P-loop containing nucleoside triphosphate hydrolase;P-loop containing nucleoside triphosphate hydrolase;P-loop containing nucleoside triphosphate hydrolase;P-loop containing nucleoside triphosphate hydrolase;P-loop containing nucleoside triphosphate hydrolase;Protein kinase domain;Leucine-rich repeat, typical subtype;Leucine-rich repeat domain superfamily;Leucine-rich repeat domain superfamily;Le…	GO:0000166;GO:0005886;GO:0016301	nucleotide binding;plasma membrane;kinase activity
Dis.W6-48549-006.v1.1AG00184.t1	TVU33421.1hypothetical protein EJB05_25238, partial	539			IPR011989;noIPR;IPR016024	Armadillo-like helical;Armadillo-like helical;Armadillo-type fold
Dis.W6-48549-006.v1.1AG00185.t1	TKW29569.1hypothetical protein SEVIR_3G403900v2	224			noIPR;noIPR	DNA-binding domain superfamily;DNA-binding domain superfamily	GO:0005739;GO:0016020;GO:0033615	mitochondrion;membrane;mitochondrial proton-transporting ATP synthase complex assembly
Dis.W6-48549-006.v1.1AG00185.t2	TVU37519.1hypothetical protein EJB05_10835	117			IPR042272;noIPR	ATP12, ATP synthase F1-assembly protein, N-terminal;ATP12, ATP synthase F1-assembly protein, N-terminal	GO:0005739;GO:0033615	mitochondrion;mitochondrial proton-transporting ATP synthase complex assembly
Dis.W6-48549-006.v1.1AG00186.t1	-	69
Dis.W6-48549-006.v1.1AG00187.t1	GJN19023.1hypothetical protein PR202_gb06254	715	EC:2.7.11.1	non-specific serine/threonine protein kinase	noIPR;noIPR;noIPR;noIPR;noIPR;IPR003591;noIPR;IPR032675;IPR032675;IPR013210;IPR001611;noIPR;noIPR;noIPR;noIPR	Protein ROH1-like;Protein ROH1-like;Protein ROH1-like;Protein ROH1-like;Protein ROH1-like;Leucine-rich repeat, typical subtype;Leucine-rich repeat, typical subtype;Leucine-rich repeat domain superfamily;Leucine-rich repeat domain superfamily;Leucine-rich repeat-containing N-terminal, plant-type;Leucine-rich repeat;Leucine-rich repeat;Leucine-rich repeat;Leucine-rich repeat;Leucine-rich repeat	GO:0004674;GO:0005524;GO:0005886;GO:0016310	protein serine/threonine kinase activity;ATP binding;plasma membrane;phosphorylation
Dis.W6-48549-006.v1.1AG00188.t1	TVU33412.1hypothetical protein EJB05_25228, partial	507	EC:2.7.11.1	non-specific serine/threonine protein kinase	noIPR;noIPR;noIPR;IPR003591;IPR032675;IPR032675;IPR013210;IPR032675;IPR001611;IPR032675;noIPR;noIPR;noIPR;IPR001611;noIPR	Zinc finger, CCHC-type superfamily;Zinc finger, CCHC-type superfamily;Zinc finger, CCHC-type superfamily;Leucine-rich repeat, typical subtype;Leucine-rich repeat domain superfamily;Leucine-rich repeat domain superfamily;Leucine-rich repeat-containing N-terminal, plant-type;Leucine-rich repeat domain superfamily;Leucine-rich repeat;Leucine-rich repeat domain superfamily;Leucine-rich repeat domain …	GO:0004674;GO:0005524;GO:0005886;GO:0016310	protein serine/threonine kinase activity;ATP binding;plasma membrane;phosphorylation
Dis.W6-48549-006.v1.1AG00189.t1	TVU33414.1hypothetical protein EJB05_25230, partial	701			noIPR;noIPR;noIPR;noIPR;IPR003591;IPR013210;IPR032675;IPR001611;IPR032675;IPR001611;IPR032675;IPR032675;noIPR;noIPR;IPR001611;noIPR;noIPR;noIPR	HSP20-like chaperone;HSP20-like chaperone;HSP20-like chaperone;HSP20-like chaperone;Leucine-rich repeat, typical subtype;Leucine-rich repeat-containing N-terminal, plant-type;Leucine-rich repeat domain superfamily;Leucine-rich repeat;Leucine-rich repeat domain superfamily;Leucine-rich repeat;Leucine-rich repeat domain superfamily;Leucine-rich repeat domain superfamily;Leucine-rich repeat domain s…	GO:0016020	membrane
Dis.W6-48549-006.v1.1AG00190.t1	GJN19032.1hypothetical protein PR202_gb06263	589			noIPR;noIPR;noIPR;IPR003591;IPR032675;IPR001611;IPR032675;IPR032675;noIPR;noIPR;noIPR	Chloramphenicol acetyltransferase-like domain superfamily;Chloramphenicol acetyltransferase-like domain superfamily;Chloramphenicol acetyltransferase-like domain superfamily;Leucine-rich repeat, typical subtype;Leucine-rich repeat domain superfamily;Leucine-rich repeat;Leucine-rich repeat domain superfamily;Leucine-rich repeat domain superfamily;Leucine-rich repeat domain superfamily;Leucine-rich…	GO:0016020	membrane
Dis.W6-48549-006.v1.1AG00191.t1	XP_037429998.1receptor-like protein 2	703			noIPR;noIPR;noIPR;IPR003591;IPR032675;IPR001611;IPR032675;IPR032675;IPR001611;IPR032675;IPR013210;noIPR;noIPR;noIPR;noIPR;noIPR	Glycosyltransferase 61;Glycosyltransferase 61;Glycosyltransferase 61;Leucine-rich repeat, typical subtype;Leucine-rich repeat domain superfamily;Leucine-rich repeat;Leucine-rich repeat domain superfamily;Leucine-rich repeat domain superfamily;Leucine-rich repeat;Leucine-rich repeat domain superfamily;Leucine-rich repeat-containing N-terminal, plant-type;Leucine-rich repeat-containing N-terminal, …	GO:0005886	plasma membrane
Dis.W6-48549-006.v1.1AG00192.t1	GJM90245.1hypothetical protein PR202_ga06506	130	EC:2	Transferases	IPR001763;IPR036873;IPR001763;noIPR;noIPR;IPR044684;IPR001763;noIPR;IPR036873	Rhodanese-like domain;Rhodanese-like domain superfamily;Rhodanese-like domain;Rhodanese-like domain;Rhodanese-like domain;Rhodanese-like domain-containing protein STR17/STR18/HARC1-like;Rhodanese-like domain;Rhodanese-like domain;Rhodanese-like domain superfamily	GO:0016740	transferase activity
Dis.W6-48549-006.v1.1AG00193.t1	XP_039788239.1translation factor GUF1 homolog, chloroplastic-like	687	EC:3.6.1.15	nucleoside-triphosphate phosphatase	noIPR;IPR000795;noIPR;noIPR;noIPR;noIPR;noIPR;IPR000640;IPR000795;IPR013842;IPR038363;IPR006297;noIPR;IPR000640;IPR027417;IPR005225;noIPR;noIPR;IPR004161;noIPR;noIPR;noIPR;IPR006297;IPR031157;IPR000795;IPR006297;IPR027518;noIPR;noIPR;IPR035654;noIPR;IPR035647;IPR009000;IPR027417;IPR035647	Aspartic peptidase domain superfamily;Translational (tr)-type GTP-binding domain;Translational (tr)-type GTP-binding domain;Translational (tr)-type GTP-binding domain;Translational (tr)-type GTP-binding domain;Translational (tr)-type GTP-binding domain;Translational (tr)-type GTP-binding domain;Elongation factor EFG, domain V-like;Translational (tr)-type GTP-binding domain;GTP-binding protein Lep…	GO:0003729;GO:0003746;GO:0003924;GO:0005525;GO:0006414;GO:0009507;GO:0019904;GO:0043022;GO:0045727	mRNA binding;translation elongation factor activity;GTPase activity;GTP binding;translational elongation;chloroplast;protein domain specific binding;ribosome binding;positive regulation of translation
Dis.W6-48549-006.v1.1AG00193.t2	XP_039788239.1translation factor GUF1 homolog, chloroplastic-like	768	EC:3.6.1.15	nucleoside-triphosphate phosphatase	noIPR;IPR000795;noIPR;noIPR;noIPR;noIPR;noIPR;IPR000640;IPR006297;noIPR;noIPR;IPR013842;IPR038363;IPR000640;IPR005225;IPR027417;IPR004161;IPR000795;noIPR;noIPR;noIPR;noIPR;noIPR;noIPR;IPR006297;IPR031157;IPR027518;IPR000795;IPR006297;noIPR;IPR035654;noIPR;noIPR;IPR035647;IPR035647;IPR009000;IPR027417	CRC domain;Translational (tr)-type GTP-binding domain;Translational (tr)-type GTP-binding domain;Translational (tr)-type GTP-binding domain;Translational (tr)-type GTP-binding domain;Translational (tr)-type GTP-binding domain;Translational (tr)-type GTP-binding domain;Elongation factor EFG, domain V-like;Elongation factor 4;Elongation factor 4;Elongation factor 4;GTP-binding protein LepA, C-termi…	GO:0003729;GO:0003746;GO:0003924;GO:0005525;GO:0006414;GO:0009507;GO:0019904;GO:0043022;GO:0045727	mRNA binding;translation elongation factor activity;GTPase activity;GTP binding;translational elongation;chloroplast;protein domain specific binding;ribosome binding;positive regulation of translation
Dis.W6-48549-006.v1.1AG00194.t1	XP_039790386.1ethylene-responsive transcription factor 3-like	192			IPR001471;noIPR;IPR001471;IPR001471;IPR036955;noIPR;IPR001471;IPR001471;IPR016177	AP2/ERF domain;AP2/ERF domain;AP2/ERF domain;AP2/ERF domain;AP2/ERF domain superfamily;AP2/ERF domain superfamily;AP2/ERF domain;AP2/ERF domain;DNA-binding domain superfamily
Dis.W6-48549-006.v1.1AG00195.t1	RLM78370.1hypothetical protein C2845_PM12G03410	116			noIPR;noIPR;IPR011992	Concanavalin A-like lectin/glucanase domain superfamily;Concanavalin A-like lectin/glucanase domain superfamily;EF-hand domain pair	GO:0005737;GO:0005886;GO:0006897;GO:0016197;GO:0043231;GO:0046872	cytoplasm;plasma membrane;endocytosis;endosomal transport;intracellular membrane-bounded organelle;metal ion binding
Dis.W6-48549-006.v1.1AG00196.t1	GJM90249.1hypothetical protein PR202_ga06510	474	EC:5	Isomerases	IPR046342;IPR004800;noIPR;IPR000644;IPR001347;noIPR;noIPR;noIPR;noIPR;IPR000644;IPR001347;IPR000644;IPR035474;noIPR;IPR046348	CBS domain superfamily;Phosphosugar isomerase, KdsD/KpsF-type;Phosphosugar isomerase, KdsD/KpsF-type;CBS domain;SIS domain;SIS domain;SIS domain;SIS domain;SIS domain;CBS domain;SIS domain;CBS domain;KpsF-like, SIS domain;KpsF-like, SIS domain;SIS domain superfamily	GO:0005975;GO:0016853;GO:0097367;GO:1901135	carbohydrate metabolic process;isomerase activity;carbohydrate derivative binding;carbohydrate derivative metabolic process
Dis.W6-48549-006.v1.1AG00197.t1	TVU32665.1hypothetical protein EJB05_24406, partial	306			IPR013742;IPR009044;noIPR;noIPR;IPR013742;IPR009044	Whirly transcription factor;ssDNA-binding transcriptional regulator;ssDNA-binding transcriptional regulator;ssDNA-binding transcriptional regulator;Whirly transcription factor;ssDNA-binding transcriptional regulator	GO:0003697;GO:0003729;GO:0005739;GO:0006281;GO:0006355;GO:0006952;GO:1990391	single-stranded DNA binding;mRNA binding;mitochondrion;DNA repair;regulation of DNA-templated transcription;defense response;DNA repair complex
Dis.W6-48549-006.v1.1AG00198.t1	TVU32662.1hypothetical protein EJB05_24403, partial	327	EC:2.1.1	Transferring one-carbon groups	IPR006514;noIPR;IPR006514	IRX15/IRX15L/GXM;IRX15/IRX15L/GXM;IRX15/IRX15L/GXM	GO:0000139;GO:0008757;GO:0009834;GO:0045492	Golgi membrane;S-adenosylmethionine-dependent methyltransferase activity;plant-type secondary cell wall biogenesis;xylan biosynthetic process
Dis.W6-48549-006.v1.1AG00199.t1	GJM90251.1hypothetical protein PR202_ga06513	171			noIPR;noIPR;noIPR	PEBP-like superfamily;PEBP-like superfamily;PEBP-like superfamily
Dis.W6-48549-006.v1.1AG00200.t1	OEL22536.1SNF1-related protein kinase regulatory subunit gamma-like PV42a	193	EC:2.7	Transferring phosphorus-containing groups	IPR046342;IPR046342	CBS domain superfamily;CBS domain superfamily	GO:0016301;GO:0016310	kinase activity;phosphorylation
Dis.W6-48549-006.v1.1AG00201.t1	TVU32659.1hypothetical protein EJB05_24400, partial	262	EC:2.7	Transferring phosphorus-containing groups	IPR000644;IPR046342;IPR046342;IPR000644;noIPR;IPR000644;IPR046342	CBS domain;CBS domain superfamily;CBS domain superfamily;CBS domain;CBS domain;CBS domain;CBS domain superfamily	GO:0016301;GO:0016310	kinase activity;phosphorylation
Dis.W6-48549-006.v1.1AG00202.t1	TVU32672.1hypothetical protein EJB05_24415	710			noIPR;noIPR;IPR042277;IPR005061;noIPR;noIPR;noIPR;noIPR;noIPR;noIPR;noIPR;IPR005061	Sodium channel modifier 1;Sodium channel modifier 1;Vacuolar protein sorting-associated protein IST1-like;Vacuolar protein sorting-associated protein Ist1;Vacuolar protein sorting-associated protein Ist1;Vacuolar protein sorting-associated protein Ist1;Vacuolar protein sorting-associated protein Ist1;Vacuolar protein sorting-associated protein Ist1;Vacuolar protein sorting-associated protein Ist1…	GO:0015031	protein transport
Dis.W6-48549-006.v1.1AG00203.t1	GJM90260.1hypothetical protein PR202_ga06522	73			noIPR	Leucine-rich repeat domain superfamily	GO:0016020	membrane
Dis.W6-48549-006.v1.1AG00204.t1	TVU32677.1hypothetical protein EJB05_24420	377			noIPR;IPR003782;noIPR;noIPR;noIPR;noIPR;noIPR;noIPR;IPR003782;IPR013766;IPR003782;IPR036249	Glycoside hydrolase superfamily;Copper chaperone SCO1/SenC;Copper chaperone SCO1/SenC;Copper chaperone SCO1/SenC;Copper chaperone SCO1/SenC;Copper chaperone SCO1/SenC;Copper chaperone SCO1/SenC;Copper chaperone SCO1/SenC;Copper chaperone SCO1/SenC;Thioredoxin domain;Copper chaperone SCO1/SenC;Thioredoxin-like superfamily	GO:0005507;GO:0005743;GO:0006878;GO:0009793;GO:0016531;GO:0033617	copper ion binding;mitochondrial inner membrane;intracellular copper ion homeostasis;embryo development ending in seed dormancy;copper chaperone activity;mitochondrial cytochrome c oxidase assembly
Dis.W6-48549-006.v1.1AG00205.t1	GJN19045.1hypothetical protein PR202_gb06278	289			noIPR;noIPR;noIPR;noIPR;noIPR;noIPR;noIPR	Chaperone J-domain superfamily;Chaperone J-domain superfamily;Chaperone J-domain superfamily;Chaperone J-domain superfamily;Chaperone J-domain superfamily;Chaperone J-domain superfamily;Chaperone J-domain superfamily
Dis.W6-48549-006.v1.1AG00206.t1	-	83			noIPR;noIPR;noIPR	Concanavalin A-like lectin/glucanase domain superfamily;Concanavalin A-like lectin/glucanase domain superfamily;Concanavalin A-like lectin/glucanase domain superfamily
Dis.W6-48549-006.v1.1AG00207.t1	GJM90264.1hypothetical protein PR202_ga06526	488			IPR006566;IPR032675;IPR006566;noIPR;IPR001810;noIPR;noIPR;noIPR;IPR036047	FBD domain;Leucine-rich repeat domain superfamily;FBD domain;FBD domain;F-box domain;F-box domain;F-box domain;F-box domain;F-box-like domain superfamily
Dis.W6-48549-006.v1.1AG00208.t1	GJN19047.1hypothetical protein PR202_gb06280	538			IPR003663;noIPR;IPR005828;IPR003663;IPR036259;IPR045262;IPR005829;IPR020846;IPR044778;IPR036259	Sugar/inositol transporter;Sugar/inositol transporter;Major facilitator, sugar transporter-like;Sugar/inositol transporter;MFS transporter superfamily;Sugar transport protein STP/Polyol transporter PLT, plant;Sugar transporter, conserved site;Major facilitator superfamily domain;Sugar transport protein STP/MST-like, plant;MFS transporter superfamily	GO:0015145;GO:0015293;GO:0015749;GO:0016020	monosaccharide transmembrane transporter activity;symporter activity;monosaccharide transmembrane transport;membrane
Dis.W6-48549-006.v1.1AG00209.t1	-	70
Dis.W6-48549-006.v1.1AG00210.t1	-	120
Dis.W6-48549-006.v1.1AG00211.t1	XP_004951847.1uncharacterized protein LOC101757205	155			IPR022251;noIPR;IPR022251	Protein of unknown function wound-induced;Protein of unknown function wound-induced;Protein of unknown function wound-induced
Dis.W6-48549-006.v1.1AG00212.t1	KAJ1277992.1hypothetical protein BS78_04G045900	514			noIPR;noIPR;noIPR;noIPR;noIPR;noIPR;noIPR;noIPR;noIPR;noIPR;noIPR;noIPR;noIPR;noIPR;IPR045868;IPR000571	At5g01610-like superfamily;At5g01610-like superfamily;At5g01610-like superfamily;At5g01610-like superfamily;At5g01610-like superfamily;At5g01610-like superfamily;At5g01610-like superfamily;At5g01610-like superfamily;At5g01610-like superfamily;At5g01610-like superfamily;At5g01610-like superfamily;At5g01610-like superfamily;At5g01610-like superfamily;At5g01610-like superfamily;Zinc finger CCCH doma…	GO:0046872	metal ion binding
Dis.W6-48549-006.v1.1AG00212.t2	KAJ1277992.1hypothetical protein BS78_04G045900	531			noIPR;noIPR;noIPR;noIPR;noIPR;noIPR;noIPR;noIPR;noIPR;noIPR;noIPR;noIPR;noIPR;noIPR;noIPR;IPR045868;IPR000571	Cytochrome P450 superfamily;Cytochrome P450 superfamily;Cytochrome P450 superfamily;Cytochrome P450 superfamily;Cytochrome P450 superfamily;Cytochrome P450 superfamily;Cytochrome P450 superfamily;Cytochrome P450 superfamily;Cytochrome P450 superfamily;Cytochrome P450 superfamily;Cytochrome P450 superfamily;Cytochrome P450 superfamily;Cytochrome P450 superfamily;Cytochrome P450 superfamily;Cytochr…	GO:0046872	metal ion binding
Dis.W6-48549-006.v1.1AG00212.t3	KAJ1277992.1hypothetical protein BS78_04G045900	450			noIPR;noIPR;noIPR;noIPR;noIPR;noIPR;noIPR;noIPR;noIPR;noIPR;IPR045868;IPR000571	Papain-like cysteine peptidase superfamily;Papain-like cysteine peptidase superfamily;Papain-like cysteine peptidase superfamily;Papain-like cysteine peptidase superfamily;Papain-like cysteine peptidase superfamily;Papain-like cysteine peptidase superfamily;Papain-like cysteine peptidase superfamily;Papain-like cysteine peptidase superfamily;Papain-like cysteine peptidase superfamily;Papain-like …	GO:0046872	metal ion binding
Dis.W6-48549-006.v1.1AG00213.t1	TVU32689.1hypothetical protein EJB05_24432, partial	348	EC:1.11.1.7	peroxidase	IPR000823;IPR002016;noIPR;noIPR;noIPR;IPR002016;noIPR;noIPR;noIPR;noIPR;noIPR;noIPR;IPR000823;IPR019794;IPR019793;IPR002016;IPR033905;IPR010255	Plant peroxidase;Haem peroxidase;Haem peroxidase;Haem peroxidase;Haem peroxidase;Haem peroxidase;Haem peroxidase;Haem peroxidase;Haem peroxidase;Haem peroxidase;Haem peroxidase;Haem peroxidase;Plant peroxidase;Peroxidase, active site;Peroxidases heam-ligand binding site;Haem peroxidase;Secretory peroxidase;Haem peroxidase superfamily	GO:0005576;GO:0006979;GO:0009505;GO:0016020;GO:0020037;GO:0042744;GO:0046872;GO:0098869;GO:0140825	extracellular region;response to oxidative stress;plant-type cell wall;membrane;heme binding;hydrogen peroxide catabolic process;metal ion binding;cellular oxidant detoxification;lactoperoxidase activity
Dis.W6-48549-006.v1.1AG00214.t1	GJM92113.1hypothetical protein PR202_ga08544	94			IPR022042;IPR022042	snRNA-activating protein complex, subunit 3;snRNA-activating protein complex, subunit 3	GO:0000978;GO:0001006;GO:0001046;GO:0003681;GO:0005634;GO:0019185;GO:0042795;GO:0042796	RNA polymerase II cis-regulatory region sequence-specific DNA binding;RNA polymerase III type 3 promoter sequence-specific DNA binding;core promoter sequence-specific DNA binding;bent DNA binding;nucleus;snRNA-activating protein complex;snRNA transcription by RNA polymerase II;snRNA transcription by RNA polymerase III
Dis.W6-48549-006.v1.1AG00215.t1	GJN31039.1hypothetical protein PR202_gb19393	174			noIPR;noIPR;noIPR;noIPR;IPR031105;noIPR;IPR009057	Tryptophan synthase beta chain-like, PALP domain superfamily;Tryptophan synthase beta chain-like, PALP domain superfamily;Tryptophan synthase beta chain-like, PALP domain superfamily;Tryptophan synthase beta chain-like, PALP domain superfamily;Telomere repeat-binding protein, plant;Telomere repeat-binding protein, plant;Homeobox-like domain superfamily	GO:0042162	telomeric DNA binding
Dis.W6-48549-006.v1.1AG00216.t1	-	91			noIPR;noIPR	Phylloplanin-like;Phylloplanin-like
Dis.W6-48549-006.v1.1AG00217.t1	RLN06930.1hypothetical protein C2845_PM11G15080	208			IPR019956;noIPR;noIPR;noIPR;IPR000626;IPR000626;noIPR;noIPR;noIPR;IPR000626;IPR000626;IPR000626;IPR029071;IPR029071;IPR029071	Ubiquitin domain;Ubiquitin domain;Ubiquitin domain;Ubiquitin domain;Ubiquitin-like domain;Ubiquitin-like domain;Ubiquitin-like domain;Ubiquitin-like domain;Ubiquitin-like domain;Ubiquitin-like domain;Ubiquitin-like domain;Ubiquitin-like domain;Ubiquitin-like domain superfamily;Ubiquitin-like domain superfamily;Ubiquitin-like domain superfamily	GO:0003729;GO:0005634;GO:0005737;GO:0005840;GO:0016020	mRNA binding;nucleus;cytoplasm;ribosome;membrane
Dis.W6-48549-006.v1.1AG00218.t1	GJN19055.1hypothetical protein PR202_gb06288	442			noIPR;IPR003245;IPR000095;IPR008972;noIPR;noIPR;noIPR;noIPR;noIPR;IPR000095;IPR003245;IPR041846;noIPR;IPR008972	P-loop containing nucleoside triphosphate hydrolase;Phytocyanin domain;CRIB domain;Cupredoxin;Cupredoxin;Cupredoxin;Cupredoxin;Cupredoxin;Cupredoxin;CRIB domain;Phytocyanin domain;Early nodulin-like protein domain;Early nodulin-like protein domain;Cupredoxin	GO:0009055;GO:0022900;GO:0098552	electron transfer activity;electron transport chain;side of membrane
Dis.W6-48549-006.v1.1AG00219.t1	GJN19056.1hypothetical protein PR202_gb06289	206			noIPR;IPR008972;IPR003245;noIPR;noIPR;IPR039391;IPR003245;IPR041846;IPR008972	Ubiquitin interacting motif;Cupredoxin;Phytocyanin domain;Phytocyanin domain;Phytocyanin domain;Phytocyanin;Phytocyanin domain;Early nodulin-like protein domain;Cupredoxin	GO:0009055;GO:0022900;GO:0098552	electron transfer activity;electron transport chain;side of membrane
Dis.W6-48549-006.v1.1AG00220.t1	-	68
Dis.W6-48549-006.v1.1AG00221.t1	TVU32681.1hypothetical protein EJB05_24424	403	EC:2.4.1	Glycosyltransferases	noIPR;noIPR;IPR025298;noIPR;IPR002659;IPR002659	Protein kinase-like domain superfamily;Protein kinase-like domain superfamily;Domain of unknown function DUF4094;Domain of unknown function DUF4094;Glycosyl transferase, family 31;Glycosyl transferase, family 31	GO:0000139;GO:0008378	Golgi membrane;galactosyltransferase activity
Dis.W6-48549-006.v1.1AG00222.t1	TVU00161.1hypothetical protein EJB05_54419, partial	116			noIPR	Protein WVD2-like 7
Dis.W6-48549-006.v1.1AG00223.t1	TVU00160.1hypothetical protein EJB05_54418, partial	222			IPR002100;noIPR;IPR002100;IPR002100;IPR036879;noIPR;noIPR;noIPR;IPR002100;IPR033896;IPR036879	Transcription factor, MADS-box;Transcription factor, MADS-box;Transcription factor, MADS-box;Transcription factor, MADS-box;Transcription factor, MADS-box superfamily;Transcription factor, MADS-box superfamily;Transcription factor, MADS-box superfamily;Transcription factor, MADS-box superfamily;Transcription factor, MADS-box;MADS MEF2-like;Transcription factor, MADS-box superfamily	GO:0003677;GO:0006355	DNA binding;regulation of DNA-templated transcription
Dis.W6-48549-006.v1.1AG00223.t2	TVU00160.1hypothetical protein EJB05_54418, partial	281			IPR002100;noIPR;IPR002100;IPR002100;IPR036879;noIPR;noIPR;noIPR;IPR002100;IPR033896;IPR036879	Transcription factor, MADS-box;Transcription factor, MADS-box;Transcription factor, MADS-box;Transcription factor, MADS-box;Transcription factor, MADS-box superfamily;Transcription factor, MADS-box superfamily;Transcription factor, MADS-box superfamily;Transcription factor, MADS-box superfamily;Transcription factor, MADS-box;MADS MEF2-like;Transcription factor, MADS-box superfamily	GO:0005488	binding
Dis.W6-48549-006.v1.1AG00223.t3	TVU00160.1hypothetical protein EJB05_54418, partial	170			IPR002100;noIPR;IPR002100;IPR036879;IPR002100;noIPR;noIPR;noIPR;IPR002100;IPR033896;IPR036879	Transcription factor, MADS-box;Transcription factor, MADS-box;Transcription factor, MADS-box;Transcription factor, MADS-box superfamily;Transcription factor, MADS-box;Transcription factor, MADS-box;Transcription factor, MADS-box;Transcription factor, MADS-box;Transcription factor, MADS-box;MADS MEF2-like;Transcription factor, MADS-box superfamily	GO:0000977;GO:0005634;GO:0045944;GO:0046983	RNA polymerase II transcription regulatory region sequence-specific DNA binding;nucleus;positive regulation of transcription by RNA polymerase II;protein dimerization activity
Dis.W6-48549-006.v1.1AG00223.t4	TVU32680.1hypothetical protein EJB05_24423, partial	87
Dis.W6-48549-006.v1.1AG00224.t1	TVU32684.1hypothetical protein EJB05_24427, partial	481			noIPR;noIPR;IPR002885;IPR011990;IPR002885;IPR046960	Cytochrome P450 superfamily;Cytochrome P450 superfamily;Pentatricopeptide repeat;Tetratricopeptide-like helical domain superfamily;Pentatricopeptide repeat;Pentatricopeptide repeat-containing protein At4g14850-like, plant	GO:0003723;GO:0009451	RNA binding;RNA modification
Dis.W6-48549-006.v1.1AG00224.t2	TVU32684.1hypothetical protein EJB05_24427, partial	468			noIPR;noIPR;noIPR;IPR011990;IPR002885;IPR002885;IPR046960	Zinc finger, RING-type;Zinc finger, RING-type;Zinc finger, RING-type;Tetratricopeptide-like helical domain superfamily;Pentatricopeptide repeat;Pentatricopeptide repeat;Pentatricopeptide repeat-containing protein At4g14850-like, plant	GO:0003723;GO:0009451	RNA binding;RNA modification
Dis.W6-48549-006.v1.1AG00225.t1	-	176
Dis.W6-48549-006.v1.1AG00226.t1	GJM90285.1hypothetical protein PR202_ga06549	208	EC:3.4.19.12	ubiquitinyl hydrolase 1	noIPR;IPR003323;noIPR;noIPR;IPR003323;noIPR;IPR038765	Protein kinase-like domain superfamily;OTU domain;OTU domain;OTU domain;OTU domain;OTU domain;Papain-like cysteine peptidase superfamily	GO:0003723;GO:0004843;GO:0005737;GO:0006508;GO:0009451;GO:0030968	RNA binding;cysteine-type deubiquitinase activity;cytoplasm;proteolysis;RNA modification;endoplasmic reticulum unfolded protein response
Dis.W6-48549-006.v1.1AG00227.t1	-	112
Dis.W6-48549-006.v1.1AG00228.t1	TVU32692.1hypothetical protein EJB05_24436	922			noIPR;noIPR;noIPR;IPR003340;IPR010525;noIPR;IPR033389;noIPR;IPR003340;IPR015300;noIPR;noIPR;noIPR;IPR044835;IPR003340;IPR000270;IPR003340;IPR015300;noIPR	SANT/Myb domain;SANT/Myb domain;SANT/Myb domain;B3 DNA binding domain;Auxin response factor domain;Auxin response factor domain;AUX/IAA domain;AUX/IAA domain;B3 DNA binding domain;DNA-binding pseudobarrel domain superfamily;DNA-binding pseudobarrel domain superfamily;DNA-binding pseudobarrel domain superfamily;DNA-binding pseudobarrel domain superfamily;Auxin response factor;B3 DNA binding domain…	GO:0003677;GO:0005634;GO:0006355;GO:0009734	DNA binding;nucleus;regulation of DNA-templated transcription;auxin-activated signaling pathway
Dis.W6-48549-006.v1.1AG00228.t2	TVU32692.1hypothetical protein EJB05_24436	921			noIPR;noIPR;noIPR;IPR003340;IPR010525;IPR003340;noIPR;IPR015300;IPR033389;noIPR;noIPR;noIPR;noIPR;noIPR;IPR044835;IPR003340;IPR000270;IPR003340;noIPR;IPR015300	RNA-binding domain superfamily;RNA-binding domain superfamily;RNA-binding domain superfamily;B3 DNA binding domain;Auxin response factor domain;B3 DNA binding domain;B3 DNA binding domain;DNA-binding pseudobarrel domain superfamily;AUX/IAA domain;AUX/IAA domain;AUX/IAA domain;AUX/IAA domain;AUX/IAA domain;AUX/IAA domain;Auxin response factor;B3 DNA binding domain;PB1 domain;B3 DNA binding domain;…	GO:0003677;GO:0005634;GO:0006355;GO:0009734	DNA binding;nucleus;regulation of DNA-templated transcription;auxin-activated signaling pathway
Dis.W6-48549-006.v1.1AG00229.t1	-	72
Dis.W6-48549-006.v1.1AG00229.t2	-	184
Dis.W6-48549-006.v1.1AG00230.t1	TVU00163.1hypothetical protein EJB05_54421	399	EC:2.7.11.1	non-specific serine/threonine protein kinase	noIPR;noIPR;IPR000719;noIPR;noIPR;IPR001245;noIPR;noIPR;noIPR;noIPR;noIPR;noIPR;noIPR;noIPR;noIPR;noIPR;noIPR;noIPR;noIPR;noIPR;noIPR;noIPR;noIPR;noIPR;noIPR;noIPR;noIPR;noIPR;noIPR;noIPR;noIPR;noIPR;noIPR;noIPR;noIPR;noIPR;noIPR;noIPR;noIPR;noIPR;noIPR;noIPR;noIPR;noIPR;noIPR;noIPR;noIPR;noIPR;noIPR;noIPR;noIPR;noIPR;noIPR;noIPR;noIPR;noIPR;noIPR;noIPR;noIPR;noIPR;noIPR;noIPR;noIPR;noIPR;noIPR;n…	RNA-binding domain superfamily;RNA-binding domain superfamily;Protein kinase domain;Protein kinase domain;Protein kinase domain;Serine-threonine/tyrosine-protein kinase, catalytic domain;Serine-threonine/tyrosine-protein kinase, catalytic domain;Serine-threonine/tyrosine-protein kinase, catalytic domain;Serine-threonine/tyrosine-protein kinase, catalytic domain;Serine-threonine/tyrosine-protein k…	GO:0004674;GO:0005524;GO:0016310	protein serine/threonine kinase activity;ATP binding;phosphorylation
Dis.W6-48549-006.v1.1AG00230.t2	TVU00163.1hypothetical protein EJB05_54421	393	EC:2.7.11.1	non-specific serine/threonine protein kinase	noIPR;noIPR;IPR000719;IPR001245;noIPR;noIPR;noIPR;noIPR;noIPR;noIPR;noIPR;noIPR;noIPR;noIPR;noIPR;noIPR;noIPR;noIPR;noIPR;noIPR;noIPR;noIPR;noIPR;noIPR;noIPR;noIPR;noIPR;noIPR;noIPR;noIPR;noIPR;noIPR;noIPR;noIPR;noIPR;noIPR;noIPR;noIPR;noIPR;noIPR;noIPR;noIPR;noIPR;noIPR;noIPR;noIPR;noIPR;noIPR;noIPR;noIPR;noIPR;noIPR;noIPR;noIPR;noIPR;noIPR;noIPR;noIPR;noIPR;noIPR;noIPR;noIPR;noIPR;noIPR;noIPR;n…	DNA/RNA polymerase superfamily;DNA/RNA polymerase superfamily;Protein kinase domain;Serine-threonine/tyrosine-protein kinase, catalytic domain;Serine-threonine/tyrosine-protein kinase, catalytic domain;Serine-threonine/tyrosine-protein kinase, catalytic domain;Serine-threonine/tyrosine-protein kinase, catalytic domain;Serine-threonine/tyrosine-protein kinase, catalytic domain;Serine-threonine/tyr…	GO:0004674;GO:0005524;GO:0016310	protein serine/threonine kinase activity;ATP binding;phosphorylation
Dis.W6-48549-006.v1.1AG00231.t1	-	117
Dis.W6-48549-006.v1.1AG00232.t1	XP_004951804.1zinc finger CCCH domain-containing protein 18	435			noIPR;noIPR;noIPR;noIPR;noIPR;noIPR;noIPR	Pentatricopeptide repeat;Pentatricopeptide repeat;Pentatricopeptide repeat;Pentatricopeptide repeat;Pentatricopeptide repeat;Pentatricopeptide repeat;Pentatricopeptide repeat
Dis.W6-48549-006.v1.1AG00233.t1	TVU32715.1hypothetical protein EJB05_24466, partial	101					GO:0016020	membrane
Dis.W6-48549-006.v1.1AG00234.t1	TVU32715.1hypothetical protein EJB05_24466, partial	99					GO:0016020	membrane
Dis.W6-48549-006.v1.1AG00235.t1	-	115
Dis.W6-48549-006.v1.1AG00236.t1	OEL34924.1Protein G1-like2	254			IPR006936;noIPR;noIPR;noIPR;IPR040222;IPR006936	ALOG domain;ALOG domain;ALOG domain;ALOG domain;ALOG family;ALOG domain	GO:0005634;GO:0009299;GO:0009416	nucleus;mRNA transcription;response to light stimulus
Dis.W6-48549-006.v1.1AG00237.t1	TVU32702.1hypothetical protein EJB05_24449, partial	377	EC:6.3.4.15;EC:2.8.1.1	biotin--[biotin carboxyl-carrier protein] ligase;thiosulfate sulfurtransferase	IPR045864;IPR004408;IPR003142;IPR004143;noIPR;IPR004143;IPR004408;IPR045864	Class II Aminoacyl-tRNA synthetase/Biotinyl protein ligase (BPL) and lipoyl protein ligase (LPL);Biotin--acetyl-CoA-carboxylase ligase;Biotin protein ligase, C-terminal;Biotinyl protein ligase (BPL) and lipoyl protein ligase (LPL), catalytic domain;Biotinyl protein ligase (BPL) and lipoyl protein ligase (LPL), catalytic domain;Biotinyl protein ligase (BPL) and lipoyl protein ligase (LPL), catalyt…	GO:0004077;GO:0004792;GO:0005737;GO:0016020;GO:0036211	biotin-[acetyl-CoA-carboxylase] ligase activity;thiosulfate sulfurtransferase activity;cytoplasm;membrane;protein modification process
Dis.W6-48549-006.v1.1AG00238.t1	TVU32702.1hypothetical protein EJB05_24449, partial	329	EC:6.3.4.15;EC:2.8.1.1	biotin--[biotin carboxyl-carrier protein] ligase;thiosulfate sulfurtransferase	noIPR;noIPR;IPR001763;IPR036873;IPR001763;IPR036873;IPR045078;IPR001763;IPR001763;noIPR;noIPR;IPR036873;IPR036873	C2 domain superfamily;C2 domain superfamily;Rhodanese-like domain;Rhodanese-like domain superfamily;Rhodanese-like domain;Rhodanese-like domain superfamily;Sulfurtransferase TST/MPST-like;Rhodanese-like domain;Rhodanese-like domain;Rhodanese-like domain;Rhodanese-like domain;Rhodanese-like domain superfamily;Rhodanese-like domain superfamily	GO:0004077;GO:0004792;GO:0005739;GO:0036211	biotin-[acetyl-CoA-carboxylase] ligase activity;thiosulfate sulfurtransferase activity;mitochondrion;protein modification process
Dis.W6-48549-006.v1.1AG00239.t1	GJN19072.1hypothetical protein PR202_gb06309	312			noIPR;IPR002885;IPR002885;IPR011990;IPR002885;IPR011990;IPR046960;IPR002885;IPR002885;IPR002885	LSD1-like;Pentatricopeptide repeat;Pentatricopeptide repeat;Tetratricopeptide-like helical domain superfamily;Pentatricopeptide repeat;Tetratricopeptide-like helical domain superfamily;Pentatricopeptide repeat-containing protein At4g14850-like, plant;Pentatricopeptide repeat;Pentatricopeptide repeat;Pentatricopeptide repeat	GO:0003723;GO:0009451;GO:0043231	RNA binding;RNA modification;intracellular membrane-bounded organelle
Dis.W6-48549-006.v1.1AG00240.t1	GJM90295.1hypothetical protein PR202_ga06562	89			IPR011990;IPR002885;IPR002885	Tetratricopeptide-like helical domain superfamily;Pentatricopeptide repeat;Pentatricopeptide repeat	GO:0003723;GO:0009451;GO:0043231	RNA binding;RNA modification;intracellular membrane-bounded organelle
Dis.W6-48549-006.v1.1AG00241.t1	GJM90589.1hypothetical protein PR202_ga06888	359	EC:1	Oxidoreductases	noIPR;IPR027443;IPR044861;IPR026992;noIPR;IPR005123;noIPR	Cyclic nucleotide-binding domain superfamily;Isopenicillin N synthase-like superfamily;Isopenicillin N synthase-like, Fe(2+) 2OG dioxygenase domain;Non-haem dioxygenase N-terminal domain;Non-haem dioxygenase N-terminal domain;Oxoglutarate/iron-dependent dioxygenase;Oxoglutarate/iron-dependent dioxygenase	GO:0016491	oxidoreductase activity
Dis.W6-48549-006.v1.1AG00242.t1	GJN19074.1hypothetical protein PR202_gb06311	221			IPR001929;noIPR;IPR006045;IPR014710;IPR006045;noIPR;noIPR;IPR019780;IPR001929;IPR011051	Germin;Germin;Cupin 1;RmlC-like jelly roll fold;Cupin 1;Cupin 1;Cupin 1;Germin, manganese binding site;Germin;RmlC-like cupin domain superfamily	GO:0016020;GO:0030145;GO:0048046	membrane;manganese ion binding;apoplast
Dis.W6-48549-006.v1.1AG00243.t1	XP_034585823.1auxin-responsive protein SAUR71-like	128			IPR003676;noIPR;noIPR;IPR003676	Small auxin-up RNA;Small auxin-up RNA;Small auxin-up RNA;Small auxin-up RNA
Dis.W6-48549-006.v1.1AG00244.t1	KAJ1278049.1hypothetical protein BS78_04G050300	410			noIPR;noIPR;noIPR;noIPR	Ankyrin repeat-containing domain superfamily;Ankyrin repeat-containing domain superfamily;Ankyrin repeat-containing domain superfamily;Ankyrin repeat-containing domain superfamily
Dis.W6-48549-006.v1.1AG00244.t2	RLN08663.1hypothetical protein C2845_PM11G15430	344			noIPR;noIPR;noIPR	DNA/RNA polymerase superfamily;DNA/RNA polymerase superfamily;DNA/RNA polymerase superfamily
Dis.W6-48549-006.v1.1AG00245.t1	GJM90303.1hypothetical protein PR202_ga06570	243			noIPR;IPR016024	tRNAHis guanylyltransferase Thg1;Armadillo-type fold
Dis.W6-48549-006.v1.1AG00246.t1	KAG0531867.1hypothetical protein BDA96_04G059100	89			noIPR	Ribosomal protein S3, C-terminal domain superfamily
Dis.W6-48549-006.v1.1AG00247.t1	-	154			noIPR;noIPR	YhbY-like superfamily;YhbY-like superfamily
Dis.W6-48549-006.v1.1AG00248.t1	GJN19083.1hypothetical protein PR202_gb06320	341	EC:2.4	Glycosyltransferases	noIPR;IPR019378;IPR044982;noIPR	Concanavalin A-like lectin/glucanase domain superfamily;GDP-fucose protein O-fucosyltransferase;O-FUCOSYLTRANSFERASE1-like;O-FUCOSYLTRANSFERASE1-like	GO:0006004;GO:0009875;GO:0016020;GO:0016757	fucose metabolic process;pollen-pistil interaction;membrane;glycosyltransferase activity
Dis.W6-48549-006.v1.1AG00249.t1	XP_015626339.1OTU domain-containing protein DDB_G0284757	282	EC:3.4.19.12	ubiquitinyl hydrolase 1	noIPR;IPR003323;noIPR;noIPR;noIPR;noIPR;IPR003323;noIPR;IPR038765	Ovate protein family, C-terminal;OTU domain;OTU domain;OTU domain;OTU domain;OTU domain;OTU domain;OTU domain;Papain-like cysteine peptidase superfamily	GO:0004843	cysteine-type deubiquitinase activity
Dis.W6-48549-006.v1.1AG00249.t2	XP_004951780.1OTU domain-containing protein DDB_G0284757	279	EC:5.2.1.8;EC:3.4.19.12	peptidylprolyl isomerase;ubiquitinyl hydrolase 1	noIPR;IPR003323;noIPR;noIPR;noIPR;IPR003323;noIPR;IPR038765	Ribosomal protein S5 domain 2-type fold;OTU domain;OTU domain;OTU domain;OTU domain;OTU domain;OTU domain;Papain-like cysteine peptidase superfamily	GO:0003755;GO:0004843	peptidyl-prolyl cis-trans isomerase activity;cysteine-type deubiquitinase activity
Dis.W6-48549-006.v1.1AG00250.t1	TVU32733.1hypothetical protein EJB05_24489	355	EC:2.5.1.61	hydroxymethylbilane synthase	noIPR;IPR000860;noIPR;noIPR;noIPR;IPR000860;noIPR;noIPR;IPR000860;IPR022417;IPR022418;IPR036803;IPR000860;IPR022419;IPR000860;noIPR;noIPR;IPR036803	UDP-glucuronosyl/UDP-glucosyltransferase;Porphobilinogen deaminase;Porphobilinogen deaminase;Porphobilinogen deaminase;Porphobilinogen deaminase;Porphobilinogen deaminase;Porphobilinogen deaminase;Porphobilinogen deaminase;Porphobilinogen deaminase;Porphobilinogen deaminase, N-terminal;Porphobilinogen deaminase, C-terminal;Porphobilinogen deaminase, C-terminal domain superfamily;Porphobilinogen d…	GO:0004418;GO:0006782;GO:0009507;GO:1900865	hydroxymethylbilane synthase activity;protoporphyrinogen IX biosynthetic process;chloroplast;chloroplast RNA modification
Dis.W6-48549-006.v1.1AG00251.t1	TVU32740.1hypothetical protein EJB05_24496, partial	180			noIPR;IPR013924;noIPR;IPR013924	U6 snRNA phosphodiesterase 1;Ribonuclease H2, subunit C;Ribonuclease H2, subunit C;Ribonuclease H2, subunit C	GO:0006401;GO:0032299	RNA catabolic process;ribonuclease H2 complex
Dis.W6-48549-006.v1.1AG00252.t1	TVU32732.1hypothetical protein EJB05_24488, partial	249			noIPR;noIPR	HAD-like superfamily;HAD-like superfamily
Dis.W6-48549-006.v1.1AG00253.t1	RLN39601.1hypothetical protein C2845_PM01G10330	227			IPR013103;noIPR	Reverse transcriptase, RNA-dependent DNA polymerase;Reverse transcriptase, RNA-dependent DNA polymerase
Dis.W6-48549-006.v1.1AG00254.t1	-	146
Dis.W6-48549-006.v1.1AG00255.t1	TVU32732.1hypothetical protein EJB05_24488, partial	214			IPR046533;noIPR	Protein of unknown function DUF6598;Protein of unknown function DUF6598
Dis.W6-48549-006.v1.1AG00256.t1	GJN19087.1hypothetical protein PR202_gb06325	273			IPR013924;noIPR;noIPR;IPR013924	Ribonuclease H2, subunit C;Ribonuclease H2, subunit C;Ribonuclease H2, subunit C;Ribonuclease H2, subunit C	GO:0006401;GO:0016020;GO:0032299	RNA catabolic process;membrane;ribonuclease H2 complex
Dis.W6-48549-006.v1.1AG00257.t1	TVU32754.1hypothetical protein EJB05_24510, partial	137	EC:3.4.24	Acting on peptide bonds (peptidases)	noIPR	Tetratricopeptide-like helical domain superfamily	GO:0004176;GO:0004222;GO:0005524;GO:0006508	ATP-dependent peptidase activity;metalloendopeptidase activity;ATP binding;proteolysis
Dis.W6-48549-006.v1.1AG00258.t1	-	100
Dis.W6-48549-006.v1.1AG00259.t1	GJN19089.1hypothetical protein PR202_gb06327	148			noIPR;noIPR;IPR021131;noIPR;noIPR;noIPR;IPR001196;IPR030878;IPR036227	Class II Aminoacyl-tRNA synthetase/Biotinyl protein ligase (BPL) and lipoyl protein ligase (LPL);Class II Aminoacyl-tRNA synthetase/Biotinyl protein ligase (BPL) and lipoyl protein ligase (LPL);Ribosomal protein L18e/L15P;Ribosomal protein L18e/L15P;Ribosomal protein L18e/L15P;Ribosomal protein L18e/L15P;Ribosomal protein L15, conserved site;Ribosomal protein L15;Ribosomal L18e/L15P superfamily	GO:0003729;GO:0003735;GO:0006412;GO:0022625	mRNA binding;structural constituent of ribosome;translation;cytosolic large ribosomal subunit
Dis.W6-48549-006.v1.1AG00260.t1	GJM90311.1hypothetical protein PR202_ga06578	490	EC:2.7.2.3	phosphoglycerate kinase	IPR001576;noIPR;noIPR;IPR015824;IPR001576;IPR015824;noIPR;noIPR;noIPR;IPR001576;IPR015911;IPR001576;IPR001576;IPR036043	Phosphoglycerate kinase;Phosphoglycerate kinase;Phosphoglycerate kinase;Phosphoglycerate kinase, N-terminal;Phosphoglycerate kinase;Phosphoglycerate kinase, N-terminal;Phosphoglycerate kinase, N-terminal;Phosphoglycerate kinase, N-terminal;Phosphoglycerate kinase, N-terminal;Phosphoglycerate kinase;Phosphoglycerate kinase, conserved site;Phosphoglycerate kinase;Phosphoglycerate kinase;Phosphoglyc…	GO:0004618;GO:0005524;GO:0005829;GO:0006094;GO:0006096;GO:0016310;GO:0043531	phosphoglycerate kinase activity;ATP binding;cytosol;gluconeogenesis;glycolytic process;phosphorylation;ADP binding
Dis.W6-48549-006.v1.1AG00261.t1	TVU32749.1hypothetical protein EJB05_24505	675	EC:3.1.3.25	inositol-phosphate phosphatase	IPR002885;IPR033443;IPR002885;IPR002885;IPR002885;IPR011990;IPR011990;noIPR;IPR002885;IPR002885;IPR002885;IPR002885;IPR002885;IPR002885;IPR002885;IPR002885;IPR002885;IPR002885;noIPR	Pentatricopeptide repeat;Pentacotripeptide-repeat region of PRORP;Pentatricopeptide repeat;Pentatricopeptide repeat;Pentatricopeptide repeat;Tetratricopeptide-like helical domain superfamily;Tetratricopeptide-like helical domain superfamily;Tetratricopeptide-like helical domain superfamily;Pentatricopeptide repeat;Pentatricopeptide repeat;Pentatricopeptide repeat;Pentatricopeptide repeat;Pentatri…	GO:0003729;GO:0005737;GO:0006397;GO:0008934;GO:0046854;GO:0046872	mRNA binding;cytoplasm;mRNA processing;inositol monophosphate 1-phosphatase activity;phosphatidylinositol phosphate biosynthetic process;metal ion binding
Dis.W6-48549-006.v1.1AG00262.t1	TVU32755.1hypothetical protein EJB05_24511	301			noIPR;noIPR;noIPR;noIPR;noIPR;IPR044688	Ribonuclease H-like superfamily;Ribonuclease H-like superfamily;Ribonuclease H-like superfamily;Ribonuclease H-like superfamily;Ribonuclease H-like superfamily;Style cell-cycle inhibitor 1-like
Dis.W6-48549-006.v1.1AG00263.t1	XP_020393159.1MADS-box protein ZMM17 isoform X1	256			noIPR;IPR002100;noIPR;IPR002100;IPR002487;IPR002100;IPR036879;noIPR;noIPR;IPR002100;IPR002100;IPR002487;IPR033896;IPR036879	Zf-FLZ domain;Transcription factor, MADS-box;Transcription factor, MADS-box;Transcription factor, MADS-box;Transcription factor, K-box;Transcription factor, MADS-box;Transcription factor, MADS-box superfamily;Transcription factor, MADS-box superfamily;Transcription factor, MADS-box superfamily;Transcription factor, MADS-box;Transcription factor, MADS-box;Transcription factor, K-box;MADS MEF2-like…	GO:0000978;GO:0000981;GO:0006357;GO:0048522	RNA polymerase II cis-regulatory region sequence-specific DNA binding;DNA-binding transcription factor activity, RNA polymerase II-specific;regulation of transcription by RNA polymerase II;positive regulation of cellular process
Dis.W6-48549-006.v1.1AG00264.t1	TVU32753.1hypothetical protein EJB05_24509, partial	257			noIPR;noIPR;IPR009072;IPR007125;noIPR;noIPR;noIPR;noIPR;noIPR;IPR009072	RlpA-like domain superfamily;RlpA-like domain superfamily;Histone-fold;Histone H2A/H2B/H3;Histone H2A/H2B/H3;Histone H2A/H2B/H3;Histone H2A/H2B/H3;Histone H2A/H2B/H3;Histone H2A/H2B/H3;Histone-fold	GO:0000978;GO:0000981;GO:0005634;GO:0006357;GO:0046982	RNA polymerase II cis-regulatory region sequence-specific DNA binding;DNA-binding transcription factor activity, RNA polymerase II-specific;nucleus;regulation of transcription by RNA polymerase II;protein heterodimerization activity
Dis.W6-48549-006.v1.1AG00265.t1	GJM90319.1hypothetical protein PR202_ga06586	124			noIPR	Transcription factor Tfc4/TFIIIC-102/Sfc4
Dis.W6-48549-006.v1.1AG00266.t1	TVU32777.1hypothetical protein EJB05_24533, partial	523	EC:3	Hydrolases	IPR008258;noIPR;noIPR;noIPR;noIPR;IPR023346;IPR023346	Transglycosylase SLT domain 1;Transglycosylase SLT domain 1;Transglycosylase SLT domain 1;Transglycosylase SLT domain 1;Transglycosylase SLT domain 1;Lysozyme-like domain superfamily;Lysozyme-like domain superfamily	GO:0016787	hydrolase activity
Dis.W6-48549-006.v1.1AG00266.t2	TVU32777.1hypothetical protein EJB05_24533, partial	560	EC:3	Hydrolases	IPR008258;noIPR;noIPR;noIPR;noIPR;IPR023346;IPR023346	Transglycosylase SLT domain 1;Transglycosylase SLT domain 1;Transglycosylase SLT domain 1;Transglycosylase SLT domain 1;Transglycosylase SLT domain 1;Lysozyme-like domain superfamily;Lysozyme-like domain superfamily	GO:0016787	hydrolase activity
Dis.W6-48549-006.v1.1AG00267.t1	TVU32769.1hypothetical protein EJB05_24525	578	EC:1.2.1	Acting on the aldehyde or oxo group of donors	IPR020831;noIPR;noIPR;IPR020828;IPR020829;noIPR;IPR020828;IPR006424;noIPR;noIPR;noIPR;noIPR;noIPR;noIPR;noIPR;noIPR;IPR020831;IPR020830;IPR036291;noIPR	Glyceraldehyde/Erythrose phosphate dehydrogenase family;Glyceraldehyde/Erythrose phosphate dehydrogenase family;Glyceraldehyde/Erythrose phosphate dehydrogenase family;Glyceraldehyde 3-phosphate dehydrogenase, NAD(P) binding domain;Glyceraldehyde 3-phosphate dehydrogenase, catalytic domain;Glyceraldehyde 3-phosphate dehydrogenase, catalytic domain;Glyceraldehyde 3-phosphate dehydrogenase, NAD(P) …	GO:0006006;GO:0016620;GO:0050661;GO:0051287	glucose metabolic process;oxidoreductase activity, acting on the aldehyde or oxo group of donors, NAD or NADP as acceptor;NADP binding;NAD binding
Dis.W6-48549-006.v1.1AG00268.t1	TVU32770.1hypothetical protein EJB05_24526, partial	113			noIPR	Retrotransposon gag domain
Dis.W6-48549-006.v1.1AG00269.t1	GJM90328.1hypothetical protein PR202_ga06595	470			IPR006734;noIPR;noIPR;noIPR;noIPR;IPR000315;noIPR	PLATZ transcription factor;PLATZ transcription factor;PLATZ transcription factor;PLATZ transcription factor;PLATZ transcription factor;B-box-type zinc finger;B-box-type zinc finger	GO:0005634;GO:0008270;GO:0010150	nucleus;zinc ion binding;leaf senescence
Dis.W6-48549-006.v1.1AG00270.t1	-	154			noIPR;noIPR	Protein kinase-like domain superfamily;Protein kinase-like domain superfamily
Dis.W6-48549-006.v1.1AG00271.t1	TVU32788.1hypothetical protein EJB05_24544	297			IPR002669;noIPR;IPR002669;IPR002669	Urease accessory protein UreD;Urease accessory protein UreD;Urease accessory protein UreD;Urease accessory protein UreD	GO:0016151;GO:0043085;GO:0043419;GO:0150006	nickel cation binding;positive regulation of catalytic activity;urea catabolic process;urease activator complex
Dis.W6-48549-006.v1.1AG00272.t1	RLM79795.1VQ motif-containing protein 22-like	224			IPR008889;noIPR;noIPR;noIPR;noIPR;noIPR;noIPR;IPR039609	VQ;VQ;VQ;VQ;VQ;VQ;VQ;VQ motif-containing protein 15/22
Dis.W6-48549-006.v1.1AG00273.t1	PWZ43631.1putative FBD-associated F-box protein	88			IPR036047	F-box-like domain superfamily
Dis.W6-48549-006.v1.1AG00274.t1	RLN01043.1putative F-box/FBD/LRR-repeat protein	175			IPR032675;noIPR;noIPR	Leucine-rich repeat domain superfamily;Leucine-rich repeat domain superfamily;Leucine-rich repeat domain superfamily
Dis.W6-48549-006.v1.1AG00275.t1	GJM90333.1hypothetical protein PR202_ga06601	403	EC:3	Hydrolases	IPR006439;IPR044924;noIPR;IPR011949;IPR023214;IPR006439;noIPR;noIPR;noIPR;noIPR;IPR036412	HAD hydrolase, subfamily IA;HAD-superfamily hydrolase, subfamily IA, REG-2-like, capping domain superfamily;HAD-superfamily hydrolase, subfamily IA, REG-2-like, capping domain superfamily;HAD-superfamily hydrolase, subfamily IA, REG-2-like;HAD superfamily;HAD hydrolase, subfamily IA;HAD hydrolase, subfamily IA;HAD hydrolase, subfamily IA;HAD hydrolase, subfamily IA;HAD hydrolase, subfamily IA;HAD…	GO:0016787	hydrolase activity
Dis.W6-48549-006.v1.1AG00276.t1	TVU32793.1hypothetical protein EJB05_24549	363	EC:2.7.7.15	choline-phosphate cytidylyltransferase	noIPR;IPR004821;IPR014729;IPR004821;noIPR;IPR045049;IPR041723;noIPR	NAD(P)-binding domain superfamily;Cytidyltransferase-like domain;Rossmann-like alpha/beta/alpha sandwich fold;Cytidyltransferase-like domain;Cytidyltransferase-like domain;Choline-phosphate cytidylyltransferase Pcy1-like;CTP:phosphocholine cytidylyltransferase domain;CTP:phosphocholine cytidylyltransferase domain	GO:0004105;GO:0006657;GO:0016020;GO:0031210	choline-phosphate cytidylyltransferase activity;CDP-choline pathway;membrane;phosphatidylcholine binding
Dis.W6-48549-006.v1.1AG00277.t1	TVU32789.1hypothetical protein EJB05_24545	347			IPR005045;IPR005045;noIPR;IPR005045	CDC50/LEM3 family;CDC50/LEM3 family;CDC50/LEM3 family;CDC50/LEM3 family	GO:0005783;GO:0005794;GO:0005886;GO:0033036;GO:0051301	endoplasmic reticulum;Golgi apparatus;plasma membrane;macromolecule localization;cell division
Dis.W6-48549-006.v1.1AG00278.t1	-	81			noIPR;noIPR	Signal peptidase complex subunit 3;Signal peptidase complex subunit 3
Dis.W6-48549-006.v1.1AG00279.t1	XP_021303790.1uncharacterized protein LOC110430437	350			IPR005162;IPR032567	Retrotransposon gag domain;LDOC1-related	GO:0003824	catalytic activity
Dis.W6-48549-006.v1.1AG00280.t1	GJN16547.1hypothetical protein PR202_gb03548	392			IPR001878;IPR005162;noIPR;IPR001878;noIPR;noIPR;noIPR;noIPR;noIPR;noIPR;IPR001878;IPR036875	Zinc finger, CCHC-type;Retrotransposon gag domain;Retrotransposon gag domain;Zinc finger, CCHC-type;Zinc finger, CCHC-type;Zinc finger, CCHC-type;Zinc finger, CCHC-type;Zinc finger, CCHC-type;Zinc finger, CCHC-type;Zinc finger, CCHC-type;Zinc finger, CCHC-type;Zinc finger, CCHC-type superfamily
Dis.W6-48549-006.v1.1AG00281.t1	XP_052144053.1succinate-semialdehyde dehydrogenase, mitochondrial	525	EC:1.2.1.16;EC:1.2.1.24;EC:1.2.1.5;EC:1.2.1.3	succinate-semialdehyde dehydrogenase [NAD(P)(+)];succinate-semialdehyde dehydrogenase (NAD(+));aldehyde dehydrogenase [NAD(P)(+)];aldehyde dehydrogenase (NAD(+))	noIPR;noIPR;noIPR;IPR015590;IPR016162;IPR010102;IPR016163;noIPR;noIPR;noIPR;noIPR;IPR029510;IPR016160;noIPR;IPR016161	WRKY domain superfamily;WRKY domain superfamily;WRKY domain superfamily;Aldehyde dehydrogenase domain;Aldehyde dehydrogenase, N-terminal;Succinate semialdehyde dehydrogenase;Aldehyde dehydrogenase, C-terminal;Aldehyde dehydrogenase, C-terminal;Aldehyde dehydrogenase, C-terminal;Aldehyde dehydrogenase, C-terminal;Aldehyde dehydrogenase, C-terminal;Aldehyde dehydrogenase, glutamic acid active site;…	GO:0004029;GO:0004777;GO:0005759;GO:0006081;GO:0009450;GO:0070887	aldehyde dehydrogenase (NAD+) activity;succinate-semialdehyde dehydrogenase (NAD+) activity;mitochondrial matrix;cellular aldehyde metabolic process;gamma-aminobutyric acid catabolic process;cellular response to chemical stimulus
Dis.W6-48549-006.v1.1AG00282.t1	TVU32787.1hypothetical protein EJB05_24543	330			noIPR;IPR025756;IPR001005;noIPR;IPR006447;noIPR;noIPR;IPR044848;IPR017930;IPR009057	Allosteric substrate binding domain superfamily;MYB-CC type transcription factor, LHEQLE-containing domain;SANT/Myb domain;SANT/Myb domain;Myb domain, plants;Myb domain, plants;Myb domain, plants;PHR1-like;Myb domain;Homeobox-like domain superfamily	GO:0003677;GO:0003700;GO:0006355	DNA binding;DNA-binding transcription factor activity;regulation of DNA-templated transcription
Dis.W6-48549-006.v1.1AG00283.t1	TVU32781.1hypothetical protein EJB05_24537	333			noIPR;IPR004333;IPR036893;noIPR;noIPR;noIPR;IPR044817;IPR004333;IPR036893	ClpP/crotonase-like domain superfamily;SBP domain;SBP domain superfamily;SBP domain superfamily;SBP domain superfamily;SBP domain superfamily;Squamosa promoter-binding-like protein;SBP domain;SBP domain superfamily	GO:0003677;GO:0005634;GO:0046872	DNA binding;nucleus;metal ion binding
Dis.W6-48549-006.v1.1AG00283.t2	TVU32781.1hypothetical protein EJB05_24537	324			noIPR;IPR036893;IPR004333;noIPR;noIPR;noIPR;IPR044817;IPR004333;IPR036893	Nucleotide-diphospho-sugar transferases;SBP domain superfamily;SBP domain;SBP domain;SBP domain;SBP domain;Squamosa promoter-binding-like protein;SBP domain;SBP domain superfamily	GO:0003677;GO:0005634;GO:0046872	DNA binding;nucleus;metal ion binding
Dis.W6-48549-006.v1.1AG00284.t1	GJN19122.1hypothetical protein PR202_gb06360	412	EC:2.7.1	Transferring phosphorus-containing groups	IPR001245;noIPR;noIPR;IPR000719;noIPR;IPR001245;noIPR;noIPR;noIPR;noIPR;noIPR;noIPR;noIPR;noIPR;noIPR;noIPR;noIPR;noIPR;noIPR;noIPR;noIPR;noIPR;noIPR;noIPR;noIPR;noIPR;noIPR;noIPR;noIPR;noIPR;noIPR;noIPR;noIPR;noIPR;noIPR;noIPR;noIPR;noIPR;noIPR;noIPR;noIPR;noIPR;noIPR;noIPR;noIPR;noIPR;noIPR;noIPR;noIPR;noIPR;noIPR;noIPR;noIPR;noIPR;noIPR;noIPR;noIPR;noIPR;noIPR;noIPR;noIPR;noIPR;noIPR;noIPR;noI…	Serine-threonine/tyrosine-protein kinase, catalytic domain;Serine-threonine/tyrosine-protein kinase, catalytic domain;Serine-threonine/tyrosine-protein kinase, catalytic domain;Protein kinase domain;Protein kinase domain;Serine-threonine/tyrosine-protein kinase, catalytic domain;Serine-threonine/tyrosine-protein kinase, catalytic domain;Serine-threonine/tyrosine-protein kinase, catalytic domain;S…	GO:0004672;GO:0005524;GO:0005737;GO:0007165;GO:0016310	protein kinase activity;ATP binding;cytoplasm;signal transduction;phosphorylation
Dis.W6-48549-006.v1.1AG00285.t1	-	94
Dis.W6-48549-006.v1.1AG00286.t1	XP_034580451.1trihelix transcription factor ASR3	553			noIPR;noIPR;noIPR;noIPR;noIPR;noIPR;noIPR;noIPR;noIPR;noIPR;IPR001005	Exostosin-like;Exostosin-like;Exostosin-like;Exostosin-like;Exostosin-like;Exostosin-like;Exostosin-like;Exostosin-like;Exostosin-like;Exostosin-like;SANT/Myb domain
Dis.W6-48549-006.v1.1AG00286.t2	CAD6247907.1unnamed protein product	554			noIPR;noIPR;noIPR;noIPR;noIPR;noIPR;noIPR;noIPR;noIPR;noIPR;IPR001005	Endonuclease/exonuclease/phosphatase superfamily;Endonuclease/exonuclease/phosphatase superfamily;Endonuclease/exonuclease/phosphatase superfamily;Endonuclease/exonuclease/phosphatase superfamily;Endonuclease/exonuclease/phosphatase superfamily;Endonuclease/exonuclease/phosphatase superfamily;Endonuclease/exonuclease/phosphatase superfamily;Endonuclease/exonuclease/phosphatase superfamily;Endonuc…
Dis.W6-48549-006.v1.1AG00287.t1	XP_008645295.1pollen receptor-like kinase 5	655	EC:2.7.1	Transferring phosphorus-containing groups	noIPR;noIPR;noIPR;IPR001245;IPR032675;IPR001611;IPR032675;IPR013210;noIPR;noIPR;noIPR;noIPR;noIPR;noIPR;noIPR;noIPR;noIPR;noIPR;noIPR;noIPR;IPR046959;IPR000719;noIPR;IPR011009	Pex19 protein;Pex19 protein;Pex19 protein;Serine-threonine/tyrosine-protein kinase, catalytic domain;Leucine-rich repeat domain superfamily;Leucine-rich repeat;Leucine-rich repeat domain superfamily;Leucine-rich repeat-containing N-terminal, plant-type;Leucine-rich repeat-containing N-terminal, plant-type;Leucine-rich repeat-containing N-terminal, plant-type;Leucine-rich repeat-containing N-termi…	GO:0004672;GO:0005524;GO:0016020;GO:0016310	protein kinase activity;ATP binding;membrane;phosphorylation
Dis.W6-48549-006.v1.1AG00288.t1	AAT68207.1unknown	213			IPR007650;IPR044604;IPR007650	Zf-FLZ domain;FCS-Like Zinc finger 12/13/14;Zf-FLZ domain
Dis.W6-48549-006.v1.1AG00289.t1	-	76
Dis.W6-48549-006.v1.1AG00290.t1	TVU32801.1hypothetical protein EJB05_24558, partial	353			noIPR;noIPR;IPR004827;noIPR;IPR004827;noIPR;noIPR;noIPR;IPR044168;IPR004827;IPR004827;IPR045314;IPR046347	Protein of unknown function DUF620;Protein of unknown function DUF620;Basic-leucine zipper domain;Basic-leucine zipper domain;Basic-leucine zipper domain;Basic-leucine zipper domain;Basic-leucine zipper domain;Basic-leucine zipper domain;bZIP transcription factor RISBZ3/4/5;Basic-leucine zipper domain;Basic-leucine zipper domain;G-box binding factor 1-like, bZIP domain, plant;Basic-leucine zipper…	GO:0003677;GO:0003700;GO:0006355	DNA binding;DNA-binding transcription factor activity;regulation of DNA-templated transcription
Dis.W6-48549-006.v1.1AG00291.t1	TVT99440.1hypothetical protein EJB05_55191, partial	662	EC:7.1.2.2;EC:6;EC:7.2.2;EC:3.6.1.15	H(+)-transporting two-sector ATPase;Ligases;Catalysing the translocation of inorganic cations;nucleoside-triphosphate phosphatase	noIPR;noIPR;noIPR;noIPR;IPR031686;noIPR;IPR023366;IPR005725;IPR000194;IPR024034;IPR004100;IPR027417;noIPR;IPR022878;IPR020003;IPR022878;noIPR;noIPR;noIPR;IPR027417;IPR036121;noIPR	Zinc finger, CCHC-type superfamily;Zinc finger, CCHC-type superfamily;Zinc finger, CCHC-type superfamily;Zinc finger, CCHC-type superfamily;ATPsynthase alpha/beta subunit, N-terminal extension;ATPsynthase alpha/beta subunit, N-terminal extension;ATP synthase subunit alpha, N-terminal domain-like superfamily;ATPase, V1 complex, subunit A;ATPase, F1/V1/A1 complex, alpha/beta subunit, nucleotide-bin…	GO:0000325;GO:0005524;GO:0015986;GO:0016887;GO:0033180;GO:0046933;GO:0046961;GO:1902600	plant-type vacuole;ATP binding;proton motive force-driven ATP synthesis;ATP hydrolysis activity;proton-transporting V-type ATPase, V1 domain;proton-transporting ATP synthase activity, rotational mechanism;proton-transporting ATPase activity, rotational mechanism;proton transmembrane transport
Dis.W6-48549-006.v1.1AG00292.t1	-	72			noIPR;noIPR	Amino acid/polyamine transporter I;Amino acid/polyamine transporter I
Dis.W6-48549-006.v1.1AG00293.t1	TVU32802.1hypothetical protein EJB05_24559	378	EC:2.4	Glycosyltransferases	IPR003406;IPR044174	Glycosyl transferase, family 14;Glycosyltransferase BC10-like	GO:0016020;GO:0016757	membrane;glycosyltransferase activity
Dis.W6-48549-006.v1.1AG00294.t1	TVU32804.1hypothetical protein EJB05_24561	446			IPR014712;IPR014712;IPR008942;IPR011417;noIPR;IPR045192;noIPR;IPR008942	ANTH domain superfamily;ANTH domain superfamily;ENTH/VHS;AP180 N-terminal homology (ANTH) domain;AP180 N-terminal homology (ANTH) domain;Clathrin coat assembly protein AP180-like;Clathrin coat assembly protein AP180-like;ENTH/VHS	GO:0006897;GO:0012505;GO:0016043;GO:0030276;GO:0031410;GO:0035091	endocytosis;endomembrane system;cellular component organization;clathrin binding;cytoplasmic vesicle;phosphatidylinositol binding
Dis.W6-48549-006.v1.1AG00295.t1	BAH91557.1Os02g0175800, partial	206			noIPR;noIPR;noIPR	MFS transporter superfamily;MFS transporter superfamily;MFS transporter superfamily
Dis.W6-48549-006.v1.1AG00296.t1	TVT99443.1hypothetical protein EJB05_55194, partial	91			noIPR	Thioredoxin-like superfamily
Dis.W6-48549-006.v1.1AG00297.t1	TVU32803.1hypothetical protein EJB05_24560, partial	485			IPR018800;noIPR;noIPR;noIPR;noIPR;noIPR;noIPR;IPR018800	Proline-rich protein PRCC;Proline-rich protein PRCC;Proline-rich protein PRCC;Proline-rich protein PRCC;Proline-rich protein PRCC;Proline-rich protein PRCC;Proline-rich protein PRCC;Proline-rich protein PRCC	GO:0005634	nucleus
Dis.W6-48549-006.v1.1AG00298.t1	XP_039805315.1B-box zinc finger protein 32-like	205			IPR000315;noIPR;noIPR;noIPR	B-box-type zinc finger;B-box-type zinc finger;B-box-type zinc finger;B-box-type zinc finger	GO:0008270	zinc ion binding
Dis.W6-48549-006.v1.1AG00299.t1	TVU32809.1hypothetical protein EJB05_24567	806	EC:2.7.1	Transferring phosphorus-containing groups	noIPR;noIPR;noIPR;noIPR;IPR013210;noIPR;IPR032675;noIPR;IPR001611;IPR001245;noIPR;noIPR;noIPR;noIPR;noIPR;noIPR;noIPR;noIPR;IPR046959;IPR000719;noIPR;IPR011009	P-loop containing nucleoside triphosphate hydrolase;P-loop containing nucleoside triphosphate hydrolase;P-loop containing nucleoside triphosphate hydrolase;P-loop containing nucleoside triphosphate hydrolase;Leucine-rich repeat-containing N-terminal, plant-type;Leucine-rich repeat-containing N-terminal, plant-type;Leucine-rich repeat domain superfamily;Leucine-rich repeat domain superfamily;Leuci…	GO:0004672;GO:0005524;GO:0016020	protein kinase activity;ATP binding;membrane
Dis.W6-48549-006.v1.1AG00300.t1	XP_003570467.1transmembrane protein 230	103			IPR008590;IPR044234	Transmembrane protein 230/134;Transmembrane protein 230	GO:0005769;GO:0005770;GO:0005776;GO:0005794;GO:0016020	early endosome;late endosome;autophagosome;Golgi apparatus;membrane
Dis.W6-48549-006.v1.1AG00301.t1	RCV05240.1hypothetical protein SETIT_1G067100v2	115			noIPR	P-loop containing nucleoside triphosphate hydrolase
Dis.W6-48549-006.v1.1AG00302.t1	XP_047081066.1calcium-transporting ATPase 5, plasma membrane-type-like	1263	EC:7.2.2.10;EC:3.6.1.15	P-type Ca(2+) transporter;nucleoside-triphosphate phosphatase	IPR001757;noIPR;noIPR;noIPR;noIPR;noIPR;noIPR;noIPR;noIPR;IPR004014;IPR004014;noIPR;IPR023299;noIPR;noIPR;noIPR;IPR006408;noIPR;IPR023214;IPR001757;IPR006068;IPR024750;IPR044492;noIPR;noIPR;noIPR;noIPR;noIPR;noIPR;noIPR;IPR018303;noIPR;IPR036412;IPR023299;IPR023298;IPR008250	P-type ATPase;P-type ATPase;P-type ATPase;P-type ATPase;P-type ATPase;P-type ATPase;P-type ATPase;P-type ATPase;P-type ATPase;Cation-transporting P-type ATPase, N-terminal;Cation-transporting P-type ATPase, N-terminal;Cation-transporting P-type ATPase, N-terminal;P-type ATPase, cytoplasmic domain N;P-type ATPase, cytoplasmic domain N;P-type ATPase, cytoplasmic domain N;P-type ATPase, cytoplasmic …	GO:0005388;GO:0005516;GO:0005524;GO:0016020;GO:0016887;GO:0043231;GO:0070588	P-type calcium transporter activity;calmodulin binding;ATP binding;membrane;ATP hydrolysis activity;intracellular membrane-bounded organelle;calcium ion transmembrane transport
Dis.W6-48549-006.v1.1AG00303.t1	-	158			noIPR	DNA-binding domain superfamily
Dis.W6-48549-006.v1.1AG00304.t1	KAJ1278144.1hypothetical protein BS78_04G057000	410			IPR036893;IPR004333;noIPR;noIPR;noIPR;IPR044817;IPR004333;IPR036893	SBP domain superfamily;SBP domain;SBP domain;SBP domain;SBP domain;Squamosa promoter-binding-like protein;SBP domain;SBP domain superfamily	GO:0005488;GO:0110165	binding;cellular anatomical entity
Dis.W6-48549-006.v1.1AG00305.t1	GJN19146.1hypothetical protein PR202_gb06388	396			IPR036378;IPR000782;noIPR;noIPR;noIPR;noIPR;IPR033254;IPR000782;IPR036378	FAS1 domain superfamily;FAS1 domain;FAS1 domain;FAS1 domain;FAS1 domain;FAS1 domain;Fasciclin-like arabinogalactan protein;FAS1 domain;FAS1 domain superfamily	GO:0016020	membrane
Dis.W6-48549-006.v1.1AG00306.t1	PUZ51136.1hypothetical protein GQ55_6G151700	545	EC:6.2.1.12	4-coumarate--CoA ligase	noIPR;noIPR;IPR000873;IPR025110;IPR042099;IPR045851;noIPR;IPR020845;noIPR;noIPR	LDOC1-related;LDOC1-related;AMP-dependent synthetase/ligase domain;AMP-binding enzyme, C-terminal domain;ANL, N-terminal domain;AMP-binding enzyme, C-terminal domain superfamily;AMP-binding enzyme, C-terminal domain superfamily;AMP-binding, conserved site;AMP-binding, conserved site;AMP-binding, conserved site	GO:0009698;GO:0016207;GO:0106290	phenylpropanoid metabolic process;4-coumarate-CoA ligase activity;trans-cinnamate-CoA ligase activity
Dis.W6-48549-006.v1.1AG00307.t1	GJM90364.1hypothetical protein PR202_ga06636	164			IPR006702;IPR006459	Casparian strip membrane protein domain;Casparian strip membrane protein	GO:0016020	membrane
Dis.W6-48549-006.v1.1AG00308.t1	-	82
Dis.W6-48549-006.v1.1AG00309.t1	TVU32818.1hypothetical protein EJB05_24576	699			IPR046830;IPR046831;IPR046829;noIPR;noIPR;noIPR;noIPR;IPR012416	Calmodulin binding protein, central domain;Calmodulin binding protein-like, N-terminal domain;Calmodulin binding protein, C-terminal domain;Calmodulin binding protein, C-terminal domain;Calmodulin binding protein, C-terminal domain;Calmodulin binding protein, C-terminal domain;Calmodulin binding protein, C-terminal domain;CALMODULIN-BINDING PROTEIN60	GO:0003700;GO:0005516;GO:0005634;GO:0006355;GO:0043565;GO:0080142	DNA-binding transcription factor activity;calmodulin binding;nucleus;regulation of DNA-templated transcription;sequence-specific DNA binding;regulation of salicylic acid biosynthetic process
Dis.W6-48549-006.v1.1AG00310.t1	OEL29290.1hypothetical protein BAE44_0009691	360			IPR000315;IPR010402;IPR045281;IPR010402;IPR000315;noIPR;noIPR	B-box-type zinc finger;CCT domain;Zinc finger protein CONSTANS-like;CCT domain;B-box-type zinc finger;B-box-type zinc finger;B-box-type zinc finger	GO:0005634;GO:0008270;GO:0009909	nucleus;zinc ion binding;regulation of flower development
Dis.W6-48549-006.v1.1AG00311.t1	GJM90369.1hypothetical protein PR202_ga06642	183			noIPR;noIPR;noIPR;IPR040359	MFS transporter superfamily;MFS transporter superfamily;MFS transporter superfamily;Protein glutamine dumper
Dis.W6-48549-006.v1.1AG00312.t1	-	115			noIPR;noIPR	Helix-loop-helix DNA-binding domain superfamily;Helix-loop-helix DNA-binding domain superfamily
Dis.W6-48549-006.v1.1AG00313.t1	TVU02392.1hypothetical protein EJB05_52107, partial	645			noIPR;IPR013863;IPR015943;noIPR;noIPR;IPR040458;noIPR	Thiamin diphosphate-binding fold;Vacuolar import/degradation Vid27, C-terminal;WD40/YVTN repeat-like-containing domain superfamily;WD40/YVTN repeat-like-containing domain superfamily;WD40/YVTN repeat-like-containing domain superfamily;Vacuolar import/degradation Vid27;Vacuolar import/degradation Vid27	GO:0005634;GO:0005737	nucleus;cytoplasm
Dis.W6-48549-006.v1.1AG00314.t1	TVU32833.1hypothetical protein EJB05_24591, partial	130			IPR001841;IPR013083;IPR001841;noIPR;IPR001841;noIPR	Zinc finger, RING-type;Zinc finger, RING/FYVE/PHD-type;Zinc finger, RING-type;Zinc finger, RING-type;Zinc finger, RING-type;Zinc finger, RING-type	GO:0016020	membrane
Dis.W6-48549-006.v1.1AG00315.t1	XP_025799528.1protein ECERIFERUM 3-like	623	EC:4.1.99.5;EC:1	aldehyde oxygenase (deformylating);Oxidoreductases	IPR021940;IPR006694;noIPR;IPR036291	Very-long-chain aldehyde decarbonylase CER1-like, C-terminal;Fatty acid hydroxylase;Fatty acid hydroxylase;NAD(P)-binding domain superfamily	GO:0005506;GO:0005789;GO:0009414;GO:0009737;GO:0009924;GO:0010025;GO:0016491;GO:0043447;GO:0046184;GO:1990465	iron ion binding;endoplasmic reticulum membrane;response to water deprivation;response to abscisic acid;octadecanal decarbonylase activity;wax biosynthetic process;oxidoreductase activity;alkane biosynthetic process;aldehyde biosynthetic process;aldehyde oxygenase (deformylating) activity
Dis.W6-48549-006.v1.1AG00316.t1	XP_039807566.1serine/threonine-protein kinase BLUS1-like isoform X1	533	EC:2.7.1	Transferring phosphorus-containing groups	noIPR;noIPR;noIPR;noIPR;IPR000719;IPR000719;noIPR;noIPR;noIPR;noIPR;noIPR;noIPR;noIPR;noIPR;noIPR;noIPR;noIPR;noIPR;noIPR;noIPR;noIPR;noIPR;noIPR;noIPR;noIPR;noIPR;noIPR;noIPR;noIPR;noIPR;noIPR;noIPR;noIPR;noIPR;noIPR;noIPR;noIPR;noIPR;noIPR;noIPR;noIPR;noIPR;noIPR;noIPR;noIPR;noIPR;noIPR;noIPR;noIPR;noIPR;noIPR;noIPR;noIPR;noIPR;noIPR;noIPR;noIPR;noIPR;noIPR;noIPR;noIPR;noIPR;noIPR;noIPR;noIPR;n…	DNA-binding domain superfamily;DNA-binding domain superfamily;DNA-binding domain superfamily;DNA-binding domain superfamily;Protein kinase domain;Protein kinase domain;Protein kinase domain;Protein kinase domain;Protein kinase domain;Protein kinase domain;Protein kinase domain;Protein kinase domain;Protein kinase domain;Protein kinase domain;Protein kinase domain;Protein kinase domain;Protein kin…	GO:0004672;GO:0005524;GO:0016310;GO:0043539	protein kinase activity;ATP binding;phosphorylation;protein serine/threonine kinase activator activity
Dis.W6-48549-006.v1.1AG00317.t1	TVU32839.1hypothetical protein EJB05_24598	353			IPR004254;noIPR;noIPR;IPR004254	AdipoR/Haemolysin-III-related;AdipoR/Haemolysin-III-related;AdipoR/Haemolysin-III-related;AdipoR/Haemolysin-III-related	GO:0009725;GO:0009744;GO:0016020;GO:0038023	response to hormone;response to sucrose;membrane;signaling receptor activity
Dis.W6-48549-006.v1.1AG00318.t1	RLM78688.1hypothetical protein C2845_PM12G04720	663			IPR036465;IPR011205;IPR011205;IPR011205;IPR036465	von Willebrand factor A-like domain superfamily;Uncharacterised conserved protein UCP015417, vWA;Uncharacterised conserved protein UCP015417, vWA;Uncharacterised conserved protein UCP015417, vWA;von Willebrand factor A-like domain superfamily
Dis.W6-48549-006.v1.1AG00319.t1	GJN19168.1hypothetical protein PR202_gb06411	1140			noIPR;noIPR;noIPR;IPR045326;IPR019460;noIPR;noIPR;IPR040040;IPR029071	Bifunctional inhibitor/plant lipid transfer protein/seed storage helical domain superfamily;Bifunctional inhibitor/plant lipid transfer protein/seed storage helical domain superfamily;Bifunctional inhibitor/plant lipid transfer protein/seed storage helical domain superfamily;Autophagy protein ATG17-like domain;Autophagy-related protein 11, C-terminal;Autophagy-related protein 11, C-terminal;Autop…	GO:0000045;GO:0000422;GO:0001934;GO:0005776;GO:0010150;GO:0019901;GO:0030242;GO:0034045;GO:0034727;GO:0042803;GO:0060090;GO:0061709;GO:1990316	autophagosome assembly;autophagy of mitochondrion;positive regulation of protein phosphorylation;autophagosome;leaf senescence;protein kinase binding;autophagy of peroxisome;phagophore assembly site membrane;piecemeal microautophagy of the nucleus;protein homodimerization activity;molecular adaptor activity;reticulophagy;Atg1/ULK1 kinase complex
Dis.W6-48549-006.v1.1AG00320.t1	AQK69025.1Protein RRC1	179	EC:3	Hydrolases	noIPR;noIPR	Gamma-glutamyl cyclotransferase-like;Gamma-glutamyl cyclotransferase-like	GO:0003723;GO:0005634;GO:0006396;GO:0016787;GO:0043169	RNA binding;nucleus;RNA processing;hydrolase activity;cation binding
Dis.W6-48549-006.v1.1AG00321.t1	GJN19171.1hypothetical protein PR202_gb06414	376	EC:3.1.3.16	protein-serine/threonine phosphatase	noIPR;IPR001932;IPR036457;IPR001932;noIPR;noIPR;IPR015655;IPR000222;IPR001932;IPR001932;IPR036457	MALE GAMETOPHYTE DEFECTIVE 1;PPM-type phosphatase-like domain;PPM-type phosphatase-like domain superfamily;PPM-type phosphatase-like domain;PPM-type phosphatase-like domain;PPM-type phosphatase-like domain;Protein phosphatase 2C family;PPM-type phosphatase, divalent cation binding;PPM-type phosphatase-like domain;PPM-type phosphatase-like domain;PPM-type phosphatase-like domain superfamily	GO:0017018;GO:0046872	myosin phosphatase activity;metal ion binding
Dis.W6-48549-006.v1.1AG00321.t2	GJN19171.1hypothetical protein PR202_gb06414	415	EC:3.1.3.16	protein-serine/threonine phosphatase	noIPR;IPR001932;IPR001932;IPR036457;noIPR;noIPR;IPR015655;IPR000222;IPR001932;IPR001932;IPR036457	Zinc finger, RING-type;PPM-type phosphatase-like domain;PPM-type phosphatase-like domain;PPM-type phosphatase-like domain superfamily;PPM-type phosphatase-like domain superfamily;PPM-type phosphatase-like domain superfamily;Protein phosphatase 2C family;PPM-type phosphatase, divalent cation binding;PPM-type phosphatase-like domain;PPM-type phosphatase-like domain;PPM-type phosphatase-like domain …	GO:0017018;GO:0046872	myosin phosphatase activity;metal ion binding
Dis.W6-48549-006.v1.1AG00322.t1	XP_039788459.1nucleoid-associated protein At2g24020, chloroplastic-like isoform X1	186			noIPR;noIPR;IPR004401;IPR036894;IPR004401;IPR036894	Tetratricopeptide-like helical domain superfamily;Tetratricopeptide-like helical domain superfamily;Nucleoid-associated protein YbaB/EbfC family;Nucleoid-associated protein YbaB-like domain superfamily;Nucleoid-associated protein YbaB/EbfC family;Nucleoid-associated protein YbaB-like domain superfamily	GO:0003677	DNA binding
Dis.W6-48549-006.v1.1AG00323.t1	KAJ1278198.1hypothetical protein BS78_04G060600	433	EC:2.3.1	Acyltransferases	noIPR;IPR000182;noIPR;IPR000182;noIPR;IPR016181	PAZ domain superfamily;GNAT domain;GNAT domain;GNAT domain;GNAT domain;Acyl-CoA N-acyltransferase	GO:0016747	acyltransferase activity, transferring groups other than amino-acyl groups
Dis.W6-48549-006.v1.1AG00324.t1	GJM90388.1hypothetical protein PR202_ga06665	262	EC:5.4.99.5	chorismate mutase	noIPR;noIPR;IPR037039;IPR008238;IPR008238;IPR008238;IPR008238;IPR036263	Haem peroxidase superfamily;Haem peroxidase superfamily;Chorismate mutase, AroQ class superfamily, eukaryotic;Chorismate mutase, AroQ class, eukaryotic type;Chorismate mutase, AroQ class, eukaryotic type;Chorismate mutase, AroQ class, eukaryotic type;Chorismate mutase, AroQ class, eukaryotic type;Chorismate mutase type II superfamily	GO:0004106;GO:0005829;GO:0008652;GO:0009073;GO:0042803;GO:0046417	chorismate mutase activity;cytosol;amino acid biosynthetic process;aromatic amino acid family biosynthetic process;protein homodimerization activity;chorismate metabolic process
Dis.W6-48549-006.v1.1AG00325.t1	TVU32845.1hypothetical protein EJB05_24604	341	EC:1.1.1	Acting on the CH-OH group of donors	noIPR;IPR001509;noIPR;noIPR;noIPR;IPR036291	ENTH/VHS;NAD-dependent epimerase/dehydratase;NAD-dependent epimerase/dehydratase;NAD-dependent epimerase/dehydratase;NAD-dependent epimerase/dehydratase;NAD(P)-binding domain superfamily	GO:0016616	oxidoreductase activity, acting on the CH-OH group of donors, NAD or NADP as acceptor
Dis.W6-48549-006.v1.1AG00326.t1	-	75
Dis.W6-48549-006.v1.1AG00327.t1	OEL22484.1putative WRKY transcription factor 40	342			noIPR;noIPR;IPR003657;IPR003657;IPR036576;noIPR;noIPR;noIPR;noIPR;noIPR;IPR044810;IPR003657;IPR036576	Protein BPS1, chloroplastic;Protein BPS1, chloroplastic;WRKY domain;WRKY domain;WRKY domain superfamily;WRKY domain superfamily;WRKY domain superfamily;WRKY domain superfamily;WRKY domain superfamily;WRKY domain superfamily;WRKY transcription factor, plant;WRKY domain;WRKY domain superfamily	GO:0003677;GO:0006355;GO:0006950;GO:0009617;GO:0009620;GO:0009628;GO:0009725;GO:0033993;GO:0048523;GO:0048583;GO:1901700	DNA binding;regulation of DNA-templated transcription;response to stress;response to bacterium;response to fungus;response to abiotic stimulus;response to hormone;response to lipid;negative regulation of cellular process;regulation of response to stimulus;response to oxygen-containing compound
Dis.W6-48549-006.v1.1AG00328.t1	-	126			noIPR;noIPR	Leucine-rich repeat domain superfamily;Leucine-rich repeat domain superfamily
Dis.W6-48549-006.v1.1AG00329.t1	CAB3449077.1unnamed protein product	621			noIPR;noIPR;noIPR;IPR004854;IPR042299;noIPR;noIPR;noIPR;noIPR;noIPR;noIPR;noIPR;noIPR;noIPR;noIPR;noIPR;noIPR;IPR004854	Sugar phosphate transporter domain;Sugar phosphate transporter domain;Sugar phosphate transporter domain;Ubiquitin fusion degradation protein Ufd1-like;Ufd1-like, Nn domain;Ufd1-like, Nn domain;Ufd1-like, Nn domain;Ufd1-like, Nn domain;Ufd1-like, Nn domain;Ufd1-like, Nn domain;Ufd1-like, Nn domain;Ufd1-like, Nn domain;Ufd1-like, Nn domain;Ufd1-like, Nn domain;Ufd1-like, Nn domain;Ufd1-like, Nn do…	GO:0006511;GO:0050896	ubiquitin-dependent protein catabolic process;response to stimulus
Dis.W6-48549-006.v1.1AG00330.t1	TVU03106.1hypothetical protein EJB05_51359, partial	988	EC:3.6.1.15	nucleoside-triphosphate phosphatase	noIPR;noIPR;noIPR;noIPR;IPR001270;noIPR;noIPR;noIPR;noIPR;noIPR;IPR019489;IPR003593;IPR017730;IPR027417;noIPR;IPR003959;IPR041546;IPR027417;IPR036628;IPR003959;IPR004176;IPR019489;IPR027417;noIPR;noIPR;IPR018368;IPR028299;IPR004176;noIPR;noIPR;IPR027417;IPR036628;IPR027417	Protein kinase-like domain superfamily;Protein kinase-like domain superfamily;Protein kinase-like domain superfamily;Protein kinase-like domain superfamily;ClpA/B family;ClpA/B family;ClpA/B family;ClpA/B family;ClpA/B family;ClpA/B family;Clp ATPase, C-terminal;AAA+ ATPase domain;Chaperonin ClpB;P-loop containing nucleoside triphosphate hydrolase;P-loop containing nucleoside triphosphate hydrola…	GO:0005524;GO:0005739;GO:0016887;GO:0034605;GO:0042026	ATP binding;mitochondrion;ATP hydrolysis activity;cellular response to heat;protein refolding
Dis.W6-48549-006.v1.1AG00331.t1	-	87
Dis.W6-48549-006.v1.1AG00332.t1	TVU02894.1hypothetical protein EJB05_51574	630			noIPR;IPR001789;IPR001789;IPR001005;noIPR;IPR006447;noIPR;IPR017053;noIPR;noIPR;noIPR;noIPR;noIPR;noIPR;IPR045279;IPR001789;IPR017930;noIPR;IPR009057;IPR011006	Ammonium transporter;Signal transduction response regulator, receiver domain;Signal transduction response regulator, receiver domain;SANT/Myb domain;SANT/Myb domain;Myb domain, plants;Myb domain, plants;Response regulator B-type, plant;Response regulator B-type, plant;Response regulator B-type, plant;Response regulator B-type, plant;Response regulator B-type, plant;Response regulator B-type, plan…	GO:0000156;GO:0000160;GO:0003677;GO:0003700;GO:0005515;GO:0005634;GO:0006355;GO:0009736	phosphorelay response regulator activity;phosphorelay signal transduction system;DNA binding;DNA-binding transcription factor activity;protein binding;nucleus;regulation of DNA-templated transcription;cytokinin-activated signaling pathway
Dis.W6-48549-006.v1.1AG00333.t1	-	105			noIPR;noIPR	Ribosomal protein S8 superfamily;Ribosomal protein S8 superfamily
Dis.W6-48549-006.v1.1AG00334.t1	AAX96737.1retrotransposon protein, putative, Ty1-copia sub-class	685	EC:1.3.1	Acting on the CH-CH group of donors	noIPR;noIPR;noIPR;IPR001878;IPR001878;IPR025724;noIPR;noIPR;noIPR;noIPR;noIPR;noIPR;noIPR;noIPR;IPR001878;IPR036875	Protein of unknown function DUF1645, plant;Protein of unknown function DUF1645, plant;Protein of unknown function DUF1645, plant;Zinc finger, CCHC-type;Zinc finger, CCHC-type;GAG-pre-integrase domain;GAG-pre-integrase domain;GAG-pre-integrase domain;GAG-pre-integrase domain;GAG-pre-integrase domain;GAG-pre-integrase domain;GAG-pre-integrase domain;GAG-pre-integrase domain;GAG-pre-integrase domain…	GO:0002943;GO:0003676;GO:0006284;GO:0008270;GO:0015074;GO:0017150;GO:0050660;GO:0140097	tRNA dihydrouridine synthesis;nucleic acid binding;base-excision repair;zinc ion binding;DNA integration;tRNA dihydrouridine synthase activity;flavin adenine dinucleotide binding;catalytic activity, acting on DNA
Dis.W6-48549-006.v1.1AG00335.t1	RLM64819.1putative gag-pol polyprotein	584	EC:1.3.1	Acting on the CH-CH group of donors	IPR013103;IPR036397;noIPR;noIPR;noIPR;IPR001584;IPR012337;IPR043502	Reverse transcriptase, RNA-dependent DNA polymerase;Ribonuclease H superfamily;Ribonuclease H superfamily;Ribonuclease H superfamily;Ribonuclease H superfamily;Integrase, catalytic core;Ribonuclease H-like superfamily;DNA/RNA polymerase superfamily	GO:0002943;GO:0003676;GO:0006284;GO:0008270;GO:0015074;GO:0017150;GO:0050660;GO:0140097	tRNA dihydrouridine synthesis;nucleic acid binding;base-excision repair;zinc ion binding;DNA integration;tRNA dihydrouridine synthase activity;flavin adenine dinucleotide binding;catalytic activity, acting on DNA
Dis.W6-48549-006.v1.1AG00336.t1	TVU02898.1hypothetical protein EJB05_51578, partial	250			noIPR;IPR001353;IPR029055;IPR023333;IPR016050;IPR023333;IPR033811;IPR029055	Retrotransposon gag domain;Proteasome, subunit alpha/beta;Nucleophile aminohydrolases, N-terminal;Proteasome B-type subunit;Proteasome beta-type subunit, conserved site;Proteasome B-type subunit;Proteasome beta 3 subunit;Nucleophile aminohydrolases, N-terminal	GO:0005634;GO:0005737;GO:0019774;GO:0043161	nucleus;cytoplasm;proteasome core complex, beta-subunit complex;proteasome-mediated ubiquitin-dependent protein catabolic process
Dis.W6-48549-006.v1.1AG00337.t1	GJM90402.1hypothetical protein PR202_ga06679	466	EC:2.7.11.1	non-specific serine/threonine protein kinase	noIPR;noIPR;IPR000719;noIPR;noIPR;IPR000719;noIPR;noIPR;noIPR;noIPR;noIPR;noIPR;noIPR;noIPR;noIPR;noIPR;noIPR;noIPR;noIPR;noIPR;noIPR;noIPR;noIPR;noIPR;noIPR;noIPR;noIPR;noIPR;noIPR;noIPR;noIPR;noIPR;noIPR;noIPR;noIPR;noIPR;noIPR;noIPR;noIPR;noIPR;noIPR;noIPR;noIPR;noIPR;noIPR;noIPR;noIPR;noIPR;noIPR;noIPR;noIPR;noIPR;noIPR;noIPR;noIPR;noIPR;noIPR;noIPR;noIPR;noIPR;noIPR;noIPR;noIPR;noIPR;noIPR;n…	Acyl-CoA binding protein superfamily;Acyl-CoA binding protein superfamily;Protein kinase domain;Protein kinase domain;Protein kinase domain;Protein kinase domain;Protein kinase domain;Protein kinase domain;Protein kinase domain;Protein kinase domain;Protein kinase domain;Protein kinase domain;Protein kinase domain;Protein kinase domain;Protein kinase domain;Protein kinase domain;Protein kinase do…	GO:0004674;GO:0005524;GO:0005886;GO:0016310	protein serine/threonine kinase activity;ATP binding;plasma membrane;phosphorylation
Dis.W6-48549-006.v1.1AG00338.t1	TVU03114.1hypothetical protein EJB05_51367	607			noIPR;noIPR;IPR001356;IPR005540;IPR005539;IPR005541;IPR008422;IPR005539;IPR005540;IPR005541;noIPR;noIPR;noIPR;noIPR;noIPR;noIPR;noIPR;noIPR;noIPR;noIPR;IPR005539;IPR001356;IPR001356;IPR009057	Tetratricopeptide-like helical domain superfamily;Tetratricopeptide-like helical domain superfamily;Homeobox domain;KNOX1;ELK domain;KNOX2;Homeobox KN domain;ELK domain;KNOX1;KNOX2;KNOX2;KNOX2;KNOX2;KNOX2;KNOX2;KNOX2;KNOX2;KNOX2;KNOX2;KNOX2;ELK domain;Homeobox domain;Homeobox domain;Homeobox-like domain superfamily	GO:0000981;GO:0003677;GO:0005634;GO:0006357	DNA-binding transcription factor activity, RNA polymerase II-specific;DNA binding;nucleus;regulation of transcription by RNA polymerase II
Dis.W6-48549-006.v1.1AG00339.t1	-	70
Dis.W6-48549-006.v1.1AG00340.t1	GJM90405.1hypothetical protein PR202_ga06682	103			noIPR	Translation protein SH3-like domain superfamily
Dis.W6-48549-006.v1.1AG00341.t1	KAJ1278219.1hypothetical protein BS78_04G062500	481	EC:2.3.2	Acyltransferases	noIPR;noIPR;IPR001607;IPR001841;IPR001607;IPR013083;IPR001841;IPR013083;IPR011422;noIPR;noIPR;noIPR;IPR001841;IPR001607;noIPR;IPR047243;noIPR;noIPR	Thioredoxin-like superfamily;Thioredoxin-like superfamily;Zinc finger, UBP-type;Zinc finger, RING-type;Zinc finger, UBP-type;Zinc finger, RING/FYVE/PHD-type;Zinc finger, RING-type;Zinc finger, RING/FYVE/PHD-type;BRCA1-associated 2/ETP1, RRM;BRCA1-associated 2/ETP1, RRM;BRCA1-associated 2/ETP1, RRM;BRCA1-associated 2/ETP1, RRM;Zinc finger, RING-type;Zinc finger, UBP-type;Zinc finger, UBP-type;BRCA…	GO:0005737;GO:0007265;GO:0008270;GO:0010029;GO:0016567;GO:0043130;GO:0046982;GO:0061630	cytoplasm;Ras protein signal transduction;zinc ion binding;regulation of seed germination;protein ubiquitination;ubiquitin binding;protein heterodimerization activity;ubiquitin protein ligase activity
Dis.W6-48549-006.v1.1AG00341.t2	KAJ1278219.1hypothetical protein BS78_04G062500	457	EC:2.3.2	Acyltransferases	noIPR;noIPR;IPR001607;IPR001841;IPR001607;IPR013083;IPR011422;IPR013083;IPR001841;noIPR;noIPR;noIPR;noIPR;IPR001607;IPR001841;noIPR;IPR047243;noIPR;noIPR	Multidrug and toxic compound extrusion family, eukaryotic;Multidrug and toxic compound extrusion family, eukaryotic;Zinc finger, UBP-type;Zinc finger, RING-type;Zinc finger, UBP-type;Zinc finger, RING/FYVE/PHD-type;BRCA1-associated 2/ETP1, RRM;Zinc finger, RING/FYVE/PHD-type;Zinc finger, RING-type;Zinc finger, RING-type;Zinc finger, RING-type;Zinc finger, RING-type;Zinc finger, RING-type;Zinc fin…	GO:0005737;GO:0007265;GO:0008270;GO:0010029;GO:0016567;GO:0043130;GO:0046982;GO:0061630	cytoplasm;Ras protein signal transduction;zinc ion binding;regulation of seed germination;protein ubiquitination;ubiquitin binding;protein heterodimerization activity;ubiquitin protein ligase activity
Dis.W6-48549-006.v1.1AG00342.t1	XP_039788488.1protein RGF1 INDUCIBLE TRANSCRIPTION FACTOR 1 isoform X2	237			IPR006734;noIPR;IPR000315	PLATZ transcription factor;PLATZ transcription factor;B-box-type zinc finger	GO:0010078;GO:0043434;GO:2000280;GO:2000377	maintenance of root meristem identity;response to peptide hormone;regulation of root development;regulation of reactive oxygen species metabolic process
Dis.W6-48549-006.v1.1AG00343.t1	TVU03115.1hypothetical protein EJB05_51368, partial	82
Dis.W6-48549-006.v1.1AG00344.t1	-	76
Dis.W6-48549-006.v1.1AG00345.t1	TVU00057.1hypothetical protein EJB05_54550, partial	175			noIPR	C2 domain superfamily
Dis.W6-48549-006.v1.1AG00346.t1	GJM90413.1hypothetical protein PR202_ga06690	344			noIPR;noIPR;noIPR	Alpha/Beta hydrolase fold;Alpha/Beta hydrolase fold;Alpha/Beta hydrolase fold
Dis.W6-48549-006.v1.1AG00346.t2	GJM90413.1hypothetical protein PR202_ga06690	335			noIPR;noIPR;noIPR	Palmitoyltransferase, DHHC domain;Palmitoyltransferase, DHHC domain;Palmitoyltransferase, DHHC domain
Dis.W6-48549-006.v1.1AG00347.t1	GJN19192.1hypothetical protein PR202_gb06438	766	EC:7.1.3.1;EC:3.6.1.1	H(+)-exporting diphosphatase;inorganic diphosphatase	IPR004131;IPR004131;IPR004131;IPR004131;IPR004131	Pyrophosphate-energised proton pump;Pyrophosphate-energised proton pump;Pyrophosphate-energised proton pump;Pyrophosphate-energised proton pump;Pyrophosphate-energised proton pump	GO:0004427;GO:0009678;GO:0016020;GO:1902600	inorganic diphosphate phosphatase activity;diphosphate hydrolysis-driven proton transmembrane transporter activity;membrane;proton transmembrane transport
Dis.W6-48549-006.v1.1AG00348.t1	XP_039841214.1uncharacterized protein LOC120701128	123			noIPR;noIPR	ACT-like domain;ACT-like domain
Dis.W6-48549-006.v1.1AG00349.t1	TVU00069.1hypothetical protein EJB05_54562, partial	1017	EC:2.4.1.14;EC:2.4.1.13	sucrose-phosphate synthase;sucrose synthase	noIPR;IPR006380;IPR012819;IPR001296;IPR000368;noIPR;noIPR;noIPR;noIPR;IPR035659;noIPR	Ribosomal protein L25/Gln-tRNA synthetase, anti-codon-binding domain superfamily;Sucrose phosphatase-like domain;Sucrose-phosphate synthase, plant;Glycosyl transferase, family 1;Sucrose synthase;Sucrose synthase;Sucrose synthase;Sucrose synthase;Sucrose synthase;Sucrose-phosphate synthase, C-terminal;Sucrose-phosphate synthase, C-terminal	GO:0005986;GO:0016157;GO:0046524	sucrose biosynthetic process;sucrose synthase activity;sucrose-phosphate synthase activity
Dis.W6-48549-006.v1.1AG00350.t1	-	73			noIPR	Protein kinase-like domain superfamily
Dis.W6-48549-006.v1.1AG00351.t1	TVU00042.1hypothetical protein EJB05_54535	282			noIPR;noIPR;noIPR;IPR003892;noIPR;noIPR;IPR003892;noIPR;IPR009060	F-box-like domain superfamily;F-box-like domain superfamily;F-box-like domain superfamily;Ubiquitin system component CUE;Ubiquitin system component CUE;Ubiquitin system component CUE;Ubiquitin system component CUE;Ubiquitin system component CUE;UBA-like superfamily	GO:0043130	ubiquitin binding
Dis.W6-48549-006.v1.1AG00352.t1	TVU02002.1hypothetical protein EJB05_52537, partial	200	EC:1.14	Acting on paired donors, with incorporation or reduction of molecular oxygen. The oxygen incorporated need not be derived from O2	IPR002401;IPR001128;noIPR;IPR036396;IPR001128;noIPR;noIPR;noIPR;IPR017972;IPR036396	Cytochrome P450, E-class, group I;Cytochrome P450;Cytochrome P450;Cytochrome P450 superfamily;Cytochrome P450;Cytochrome P450;Cytochrome P450;Cytochrome P450;Cytochrome P450, conserved site;Cytochrome P450 superfamily	GO:0004497;GO:0005506;GO:0016020;GO:0016705;GO:0020037;GO:0071704	monooxygenase activity;iron ion binding;membrane;oxidoreductase activity, acting on paired donors, with incorporation or reduction of molecular oxygen;heme binding;organic substance metabolic process
Dis.W6-48549-006.v1.1AG00353.t1	TVU00037.1hypothetical protein EJB05_54530, partial	597	EC:1.14	Acting on paired donors, with incorporation or reduction of molecular oxygen. The oxygen incorporated need not be derived from O2	noIPR;IPR001128;IPR002401;noIPR;IPR001128;IPR036396;noIPR;IPR036396;IPR036396	SWIB/MDM2 domain superfamily;Cytochrome P450;Cytochrome P450, E-class, group I;Cytochrome P450, E-class, group I;Cytochrome P450;Cytochrome P450 superfamily;Cytochrome P450 superfamily;Cytochrome P450 superfamily;Cytochrome P450 superfamily	GO:0004497;GO:0005506;GO:0016020;GO:0016705;GO:0020037;GO:0071704	monooxygenase activity;iron ion binding;membrane;oxidoreductase activity, acting on paired donors, with incorporation or reduction of molecular oxygen;heme binding;organic substance metabolic process
Dis.W6-48549-006.v1.1AG00353.t2	TVU02003.1hypothetical protein EJB05_52538, partial	333	EC:1.14	Acting on paired donors, with incorporation or reduction of molecular oxygen. The oxygen incorporated need not be derived from O2	noIPR;noIPR;IPR036396;IPR001128;noIPR;IPR036396	v-SNARE, coiled-coil homology domain;v-SNARE, coiled-coil homology domain;Cytochrome P450 superfamily;Cytochrome P450;Cytochrome P450;Cytochrome P450 superfamily	GO:0004497;GO:0005506;GO:0016020;GO:0016705;GO:0020037;GO:0071704	monooxygenase activity;iron ion binding;membrane;oxidoreductase activity, acting on paired donors, with incorporation or reduction of molecular oxygen;heme binding;organic substance metabolic process
Dis.W6-48549-006.v1.1AG00354.t1	CAD6247812.1unnamed protein product	182			noIPR;noIPR;noIPR;noIPR;noIPR;noIPR	Helix-loop-helix DNA-binding domain superfamily;Helix-loop-helix DNA-binding domain superfamily;Helix-loop-helix DNA-binding domain superfamily;Helix-loop-helix DNA-binding domain superfamily;Helix-loop-helix DNA-binding domain superfamily;Helix-loop-helix DNA-binding domain superfamily
Dis.W6-48549-006.v1.1AG00355.t1	-	78
Dis.W6-48549-006.v1.1AG00356.t1	PWZ23781.1Premnaspirodiene oxygenase	481	EC:1.14	Acting on paired donors, with incorporation or reduction of molecular oxygen. The oxygen incorporated need not be derived from O2	IPR001128;IPR002401;noIPR;IPR036396;IPR001128;noIPR;noIPR;noIPR;IPR017972;noIPR;IPR036396	Cytochrome P450;Cytochrome P450, E-class, group I;Cytochrome P450, E-class, group I;Cytochrome P450 superfamily;Cytochrome P450;Cytochrome P450;Cytochrome P450;Cytochrome P450;Cytochrome P450, conserved site;Cytochrome P450, conserved site;Cytochrome P450 superfamily	GO:0004497;GO:0005506;GO:0016020;GO:0016705;GO:0020037;GO:0071704	monooxygenase activity;iron ion binding;membrane;oxidoreductase activity, acting on paired donors, with incorporation or reduction of molecular oxygen;heme binding;organic substance metabolic process
Dis.W6-48549-006.v1.1AG00357.t1	GJN19207.1hypothetical protein PR202_gb06454	556	EC:1.14	Acting on paired donors, with incorporation or reduction of molecular oxygen. The oxygen incorporated need not be derived from O2	noIPR;IPR001128;IPR002401;noIPR;IPR001128;IPR036396;noIPR;noIPR;noIPR;IPR017972;noIPR;IPR036396	Ubiquinol-cytochrome C reductase hinge domain superfamily;Cytochrome P450;Cytochrome P450, E-class, group I;Cytochrome P450, E-class, group I;Cytochrome P450;Cytochrome P450 superfamily;Cytochrome P450 superfamily;Cytochrome P450 superfamily;Cytochrome P450 superfamily;Cytochrome P450, conserved site;Cytochrome P450, conserved site;Cytochrome P450 superfamily	GO:0004497;GO:0005506;GO:0016020;GO:0016705;GO:0020037;GO:0071704	monooxygenase activity;iron ion binding;membrane;oxidoreductase activity, acting on paired donors, with incorporation or reduction of molecular oxygen;heme binding;organic substance metabolic process
Dis.W6-48549-006.v1.1AG00358.t1	GJM90434.1hypothetical protein PR202_ga06712	782	EC:1	Oxidoreductases	IPR002401;IPR001128;noIPR;IPR001128;IPR036396;IPR037175;IPR007325;noIPR;noIPR;IPR007325;IPR017972;IPR037175;IPR036396	Cytochrome P450, E-class, group I;Cytochrome P450;Cytochrome P450;Cytochrome P450;Cytochrome P450 superfamily;Kynurenine formamidase superfamily;Kynurenine formamidase/cyclase-like;Kynurenine formamidase/cyclase-like;Kynurenine formamidase/cyclase-like;Kynurenine formamidase/cyclase-like;Cytochrome P450, conserved site;Kynurenine formamidase superfamily;Cytochrome P450 superfamily	GO:0016491;GO:0046872	oxidoreductase activity;metal ion binding
Dis.W6-48549-006.v1.1AG00359.t1	TVU02011.1hypothetical protein EJB05_52546	305	EC:3.5.1.9	arylformamidase	IPR007325;IPR037175;IPR007325;IPR037175	Kynurenine formamidase/cyclase-like;Kynurenine formamidase superfamily;Kynurenine formamidase/cyclase-like;Kynurenine formamidase superfamily	GO:0004061;GO:0005576;GO:0019441	arylformamidase activity;extracellular region;tryptophan catabolic process to kynurenine
Dis.W6-48549-006.v1.1AG00360.t1	TVU02017.1hypothetical protein EJB05_52552	399	EC:2.4	Glycosyltransferases	IPR040911;IPR004263	Exostosin, GT47 domain;Exostosin-like	GO:0005794;GO:0016020;GO:0016757	Golgi apparatus;membrane;glycosyltransferase activity
Dis.W6-48549-006.v1.1AG00361.t1	TVU00030.1hypothetical protein EJB05_54523	748	EC:3.1.4.46	glycerophosphodiester phosphodiesterase	noIPR;noIPR;IPR030395;IPR017946;noIPR;IPR030395;IPR030395;noIPR;noIPR;IPR017946;IPR017946	WD40-repeat-containing domain superfamily;WD40-repeat-containing domain superfamily;Glycerophosphodiester phosphodiesterase domain;PLC-like phosphodiesterase, TIM beta/alpha-barrel domain superfamily;PLC-like phosphodiesterase, TIM beta/alpha-barrel domain superfamily;Glycerophosphodiester phosphodiesterase domain;Glycerophosphodiester phosphodiesterase domain;Glycerophosphodiester phosphodiester…	GO:0006071;GO:0006629;GO:0008889	glycerol metabolic process;lipid metabolic process;glycerophosphodiester phosphodiesterase activity
Dis.W6-48549-006.v1.1AG00362.t1	-	113
Dis.W6-48549-006.v1.1AG00363.t1	TVU00032.1hypothetical protein EJB05_54525	281			IPR022051;IPR022051	Protein of unknown function DUF3611;Protein of unknown function DUF3611	GO:0016020	membrane
Dis.W6-48549-006.v1.1AG00364.t1	-	152			noIPR	Zinc finger, GATA-type
Dis.W6-48549-006.v1.1AG00365.t1	XP_025817137.1transcription factor MYB44-like	277			noIPR;IPR001005;noIPR;noIPR;IPR001005;noIPR;noIPR;noIPR;IPR017930;IPR001005;IPR001005;IPR017930;IPR001005;IPR001005;IPR009057	Protein kinase-like domain superfamily;SANT/Myb domain;SANT/Myb domain;SANT/Myb domain;SANT/Myb domain;SANT/Myb domain;SANT/Myb domain;SANT/Myb domain;Myb domain;SANT/Myb domain;SANT/Myb domain;Myb domain;SANT/Myb domain;SANT/Myb domain;Homeobox-like domain superfamily	GO:0000978;GO:0000981;GO:0005634;GO:0006357	RNA polymerase II cis-regulatory region sequence-specific DNA binding;DNA-binding transcription factor activity, RNA polymerase II-specific;nucleus;regulation of transcription by RNA polymerase II
Dis.W6-48549-006.v1.1AG00366.t1	-	116
Dis.W6-48549-006.v1.1AG00367.t1	TVU02016.1hypothetical protein EJB05_52551	368	EC:1.1.1.195	cinnamyl-alcohol dehydrogenase	noIPR;noIPR;noIPR;IPR020843;noIPR;IPR013149;noIPR;IPR013154;IPR047109;IPR002328;IPR047109;IPR036291;IPR011032	Protein kinase-like domain superfamily;Protein kinase-like domain superfamily;Protein kinase-like domain superfamily;Polyketide synthase, enoylreductase domain;Polyketide synthase, enoylreductase domain;Alcohol dehydrogenase-like, C-terminal;Alcohol dehydrogenase-like, C-terminal;Alcohol dehydrogenase-like, N-terminal;Cinnamyl alcohol dehydrogenase-like;Alcohol dehydrogenase, zinc-type, conserved…	GO:0008270;GO:0009809;GO:0045551;GO:0052747	zinc ion binding;lignin biosynthetic process;cinnamyl-alcohol dehydrogenase activity;sinapyl alcohol dehydrogenase activity
Dis.W6-48549-006.v1.1AG00368.t1	TVU02014.1hypothetical protein EJB05_52549, partial	475	EC:2.4.1	Glycosyltransferases	noIPR;noIPR;IPR002213;noIPR;noIPR;IPR035595;IPR002213;noIPR	Fatty acid hydroxylase;Fatty acid hydroxylase;UDP-glucuronosyl/UDP-glucosyltransferase;UDP-glucuronosyl/UDP-glucosyltransferase;UDP-glucuronosyl/UDP-glucosyltransferase;UDP-glycosyltransferase family, conserved site;UDP-glucuronosyl/UDP-glucosyltransferase;UDP-glucuronosyl/UDP-glucosyltransferase	GO:0005737;GO:0080043;GO:0080044	cytoplasm;quercetin 3-O-glucosyltransferase activity;quercetin 7-O-glucosyltransferase activity
Dis.W6-48549-006.v1.1AG00369.t1	-	106
Dis.W6-48549-006.v1.1AG00370.t1	GJM90451.1hypothetical protein PR202_ga06732	85
Dis.W6-48549-006.v1.1AG00371.t1	TVU32856.1hypothetical protein EJB05_24617	139			IPR001911;IPR038380;IPR001911;IPR001911;noIPR;noIPR;noIPR;IPR001911;IPR001911	Ribosomal protein S21;Ribosomal protein S21 superfamily;Ribosomal protein S21;Ribosomal protein S21;Ribosomal protein S21;Ribosomal protein S21;Ribosomal protein S21;Ribosomal protein S21;Ribosomal protein S21	GO:0003735;GO:0005840;GO:0006412;GO:1990904	structural constituent of ribosome;ribosome;translation;ribonucleoprotein complex
Dis.W6-48549-006.v1.1AG00372.t1	PWZ53734.1hypothetical protein Zm00014a_030702, partial	100			noIPR	Translation Initiation factor eIF- 4e-like
Dis.W6-48549-006.v1.1AG00373.t1	GJM90454.1hypothetical protein PR202_ga06735	355	EC:3.1	Acting on ester bonds	IPR036514;IPR001087;noIPR;IPR035669;noIPR	SGNH hydrolase superfamily;GDSL lipase/esterase;GDSL lipase/esterase;GDSL lipase/esterase-like, plant;GDSL lipase/esterase-like, plant	GO:0016788	hydrolase activity, acting on ester bonds
Dis.W6-48549-006.v1.1AG00374.t1	TVT97334.1hypothetical protein EJB05_57424, partial	343			IPR008700;noIPR;noIPR;noIPR;noIPR;IPR040387	RIN4, pathogenic type III effector avirulence factor Avr cleavage site;RIN4, pathogenic type III effector avirulence factor Avr cleavage site;RIN4, pathogenic type III effector avirulence factor Avr cleavage site;RIN4, pathogenic type III effector avirulence factor Avr cleavage site;RIN4, pathogenic type III effector avirulence factor Avr cleavage site;RPM1-interacting protein 4/NOI4
Dis.W6-48549-006.v1.1AG00375.t1	-	103
Dis.W6-48549-006.v1.1AG00376.t1	GJM90458.1hypothetical protein PR202_ga06739	193			IPR001471;noIPR;IPR001471;IPR001471;IPR036955;noIPR;noIPR;noIPR;IPR001471;IPR001471;IPR016177	AP2/ERF domain;AP2/ERF domain;AP2/ERF domain;AP2/ERF domain;AP2/ERF domain superfamily;AP2/ERF domain superfamily;AP2/ERF domain superfamily;AP2/ERF domain superfamily;AP2/ERF domain;AP2/ERF domain;DNA-binding domain superfamily
Dis.W6-48549-006.v1.1AG00377.t1	VAI56734.1unnamed protein product	524	EC:7.2.2;EC:3.6.1.15	Catalysing the translocation of inorganic cations;nucleoside-triphosphate phosphatase	noIPR;IPR003593;IPR011527;IPR036640;IPR003439;IPR027417;IPR039421;IPR017871;IPR011527;IPR003439;noIPR;IPR036640;IPR027417	Zinc finger, RING-type;AAA+ ATPase domain;ABC transporter type 1, transmembrane domain;ABC transporter type 1, transmembrane domain superfamily;ABC transporter-like, ATP-binding domain;P-loop containing nucleoside triphosphate hydrolase;Type 1 protein exporter;ABC transporter-like, conserved site;ABC transporter type 1, transmembrane domain;ABC transporter-like, ATP-binding domain;ABC transporter…	GO:0005524;GO:0016020;GO:0016887;GO:0055085;GO:0140359	ATP binding;membrane;ATP hydrolysis activity;transmembrane transport;ABC-type transporter activity
Dis.W6-48549-006.v1.1AG00378.t1	XP_004951620.1putative multidrug resistance protein	661	EC:7.2.2;EC:3.6.1.15	Catalysing the translocation of inorganic cations;nucleoside-triphosphate phosphatase	noIPR;noIPR;IPR003593;IPR027417;IPR011527;IPR003439;IPR036640;noIPR;noIPR;noIPR;IPR039421;IPR017871;IPR011527;IPR003439;noIPR;noIPR;IPR036640;IPR027417	NADH dehydrogenase [ubiquinone] 1 alpha subcomplex subunit 5;NADH dehydrogenase [ubiquinone] 1 alpha subcomplex subunit 5;AAA+ ATPase domain;P-loop containing nucleoside triphosphate hydrolase;ABC transporter type 1, transmembrane domain;ABC transporter-like, ATP-binding domain;ABC transporter type 1, transmembrane domain superfamily;ABC transporter type 1, transmembrane domain superfamily;ABC tr…	GO:0005524;GO:0016020;GO:0016887;GO:0055085;GO:0140359	ATP binding;membrane;ATP hydrolysis activity;transmembrane transport;ABC-type transporter activity
Dis.W6-48549-006.v1.1AG00379.t1	VAI56735.1unnamed protein product	399	EC:7.2.2;EC:3.6.1.15	Catalysing the translocation of inorganic cations;nucleoside-triphosphate phosphatase	noIPR;noIPR;IPR003593;IPR003439;IPR027417;IPR011527;IPR036640;IPR039421;IPR017871;IPR003439;IPR011527;noIPR;IPR036640;IPR027417	Cullin repeat-like-containing domain superfamily;Cullin repeat-like-containing domain superfamily;AAA+ ATPase domain;ABC transporter-like, ATP-binding domain;P-loop containing nucleoside triphosphate hydrolase;ABC transporter type 1, transmembrane domain;ABC transporter type 1, transmembrane domain superfamily;Type 1 protein exporter;ABC transporter-like, conserved site;ABC transporter-like, ATP-…	GO:0005524;GO:0016020;GO:0016887;GO:0055085;GO:0140359	ATP binding;membrane;ATP hydrolysis activity;transmembrane transport;ABC-type transporter activity
Dis.W6-48549-006.v1.1AG00380.t1	CAD6247762.1unnamed protein product	713	EC:2.7.1	Transferring phosphorus-containing groups	noIPR;noIPR;noIPR;noIPR;IPR032675;IPR001245;IPR013210;noIPR;noIPR;noIPR;noIPR;noIPR;noIPR;noIPR;noIPR;noIPR;noIPR;noIPR;noIPR;noIPR;noIPR;noIPR;noIPR;noIPR;noIPR;noIPR;noIPR;noIPR;noIPR;noIPR;noIPR;noIPR;noIPR;noIPR;noIPR;noIPR;noIPR;noIPR;noIPR;noIPR;noIPR;noIPR;noIPR;noIPR;IPR046959;IPR000719;noIPR;noIPR;IPR011009	Mitochondrial carrier domain superfamily;Mitochondrial carrier domain superfamily;Mitochondrial carrier domain superfamily;Mitochondrial carrier domain superfamily;Leucine-rich repeat domain superfamily;Serine-threonine/tyrosine-protein kinase, catalytic domain;Leucine-rich repeat-containing N-terminal, plant-type;Leucine-rich repeat-containing N-terminal, plant-type;Leucine-rich repeat-containin…	GO:0004672;GO:0005524;GO:0005886;GO:0016310	protein kinase activity;ATP binding;plasma membrane;phosphorylation
Dis.W6-48549-006.v1.1AG00381.t1	-	66
Dis.W6-48549-006.v1.1AG00382.t1	GJN19237.1hypothetical protein PR202_gb06486	524	EC:1.14;EC:5.3	Acting on paired donors, with incorporation or reduction of molecular oxygen. The oxygen incorporated need not be derived from O2;Intramolecular oxidoreductases	noIPR;noIPR;IPR036188;IPR010108;noIPR;noIPR;IPR036188	Cleavage/polyadenylation specificity factor, A subunit, C-terminal;Cleavage/polyadenylation specificity factor, A subunit, C-terminal;FAD/NAD(P)-binding domain superfamily;Lycopene cyclase, beta/epsilon;Lycopene cyclase, beta/epsilon;Lycopene cyclase, beta/epsilon;FAD/NAD(P)-binding domain superfamily	GO:0016117;GO:0016705;GO:0045436	carotenoid biosynthetic process;oxidoreductase activity, acting on paired donors, with incorporation or reduction of molecular oxygen;lycopene beta cyclase activity
Dis.W6-48549-006.v1.1AG00383.t1	GJM90465.1hypothetical protein PR202_ga06746	121
Dis.W6-48549-006.v1.1AG00384.t1	KAJ1278288.1hypothetical protein BS78_04G068700	396	EC:3.4	Acting on peptide bonds (peptidases)	IPR022742;IPR029058;noIPR;noIPR;noIPR;noIPR;noIPR;IPR029058	Serine aminopeptidase, S33;Alpha/Beta hydrolase fold;Alpha/Beta hydrolase fold;Alpha/Beta hydrolase fold;Alpha/Beta hydrolase fold;Alpha/Beta hydrolase fold;Alpha/Beta hydrolase fold;Alpha/Beta hydrolase fold	GO:0006508;GO:0008233	proteolysis;peptidase activity
Dis.W6-48549-006.v1.1AG00385.t1	-	91
Dis.W6-48549-006.v1.1AG00386.t1	XP_039781135.1disease resistance protein RPM1-like	433			IPR032675;noIPR;noIPR	Leucine-rich repeat domain superfamily;Leucine-rich repeat domain superfamily;Leucine-rich repeat domain superfamily	GO:0043531;GO:0098542	ADP binding;defense response to other organism
Dis.W6-48549-006.v1.1AG00387.t1	TVU32874.1hypothetical protein EJB05_24637, partial	122			IPR019269;noIPR	Biogenesis of lysosome-related organelles complex-1, subunit 2;Biogenesis of lysosome-related organelles complex-1, subunit 2
Dis.W6-48549-006.v1.1AG00388.t1	-	105			noIPR	LDOC1-related
Dis.W6-48549-006.v1.1AG00389.t1	-	102
Dis.W6-48549-006.v1.1AG00390.t1	XP_052163078.1uncharacterized protein LOC127780165	103					GO:0005488;GO:0006259	binding;DNA metabolic process
Dis.W6-48549-006.v1.1AG00391.t1	TVU32883.1hypothetical protein EJB05_24646	459			IPR013057;noIPR	Amino acid transporter, transmembrane domain;Amino acid transporter, transmembrane domain	GO:0005886;GO:0015179;GO:1902475	plasma membrane;L-amino acid transmembrane transporter activity;L-alpha-amino acid transmembrane transport
Dis.W6-48549-006.v1.1AG00392.t1	GJM90469.1hypothetical protein PR202_ga06750	254			IPR013083;IPR001841;noIPR;noIPR	Zinc finger, RING/FYVE/PHD-type;Zinc finger, RING-type;Zinc finger, RING-type;Zinc finger, RING-type
Dis.W6-48549-006.v1.1AG00393.t1	XP_023156358.1uncharacterized protein LOC111589729 isoform X1	217
Dis.W6-48549-006.v1.1AG00394.t1	RLM79681.1basic leucine zipper 43-like	127			noIPR;noIPR;IPR004827;IPR004827;noIPR;noIPR;noIPR;IPR044521;IPR004827;IPR004827;IPR046347	Helix-loop-helix DNA-binding domain superfamily;Helix-loop-helix DNA-binding domain superfamily;Basic-leucine zipper domain;Basic-leucine zipper domain;Basic-leucine zipper domain;Basic-leucine zipper domain;Basic-leucine zipper domain;Basic leucine zipper 8/43;Basic-leucine zipper domain;Basic-leucine zipper domain;Basic-leucine zipper domain superfamily
Dis.W6-48549-006.v1.1AG00395.t1	OEL13546.1Serine/threonine protein phosphatase 2A regulatory subunit B''beta	547			noIPR;noIPR;noIPR;noIPR;noIPR;IPR002048;IPR041534;noIPR;noIPR;noIPR;noIPR;IPR018247;IPR002048;noIPR;IPR011992;IPR011992	Domain of unknown function DUF155;Domain of unknown function DUF155;Domain of unknown function DUF155;Domain of unknown function DUF155;Domain of unknown function DUF155;EF-hand domain;PP2A regulatory subunit B'', EF-hand domain;PP2A regulatory subunit B'', EF-hand domain;PP2A regulatory subunit B'', EF-hand domain;PP2A regulatory subunit B'', EF-hand domain;PP2A regulatory subunit B'', EF-hand d…	GO:0000159;GO:0005509;GO:0019888	protein phosphatase type 2A complex;calcium ion binding;protein phosphatase regulator activity
Dis.W6-48549-006.v1.1AG00396.t1	XP_025822319.1uncharacterized protein LOC112898150	126			noIPR	5'-3' exonuclease, C-terminal domain superfamily
Dis.W6-48549-006.v1.1AG00397.t1	TVU32894.1hypothetical protein EJB05_24659	89	EC:2.7.1	Transferring phosphorus-containing groups			GO:0000776;GO:0004672;GO:0007094;GO:0051754	kinetochore;protein kinase activity;mitotic spindle assembly checkpoint signaling;meiotic sister chromatid cohesion, centromeric
Dis.W6-48549-006.v1.1AG00398.t1	TVU32880.1hypothetical protein EJB05_24643	1002			IPR011676;IPR046533;noIPR;noIPR	Domain of unknown function DUF1618;Protein of unknown function DUF6598;Protein of unknown function DUF6598;Protein of unknown function DUF6598
Dis.W6-48549-006.v1.1AG00399.t1	ONM01869.1Auxin-responsive protein IAA4	112			IPR033389;noIPR	AUX/IAA domain;AUX/IAA domain
Dis.W6-48549-006.v1.1AG00400.t1	XP_006654042.1T-complex protein 1 subunit zeta 1	647	EC:3.6.1.15	nucleoside-triphosphate phosphatase	IPR017998;noIPR;noIPR;noIPR;noIPR;IPR002423;IPR027409;IPR027413;IPR027410;IPR012722;noIPR;noIPR;IPR017998;IPR002194;IPR002194;IPR012722;IPR027413;IPR027409;IPR027410	Chaperone tailless complex polypeptide 1 (TCP-1);Chaperone tailless complex polypeptide 1 (TCP-1);Chaperone tailless complex polypeptide 1 (TCP-1);Chaperone tailless complex polypeptide 1 (TCP-1);Chaperone tailless complex polypeptide 1 (TCP-1);Chaperonin Cpn60/GroEL/TCP-1 family;GroEL-like apical domain superfamily;GroEL-like equatorial domain superfamily;TCP-1-like chaperonin intermediate domai…	GO:0005524;GO:0005832;GO:0006457;GO:0016887;GO:0051082;GO:0140662	ATP binding;chaperonin-containing T-complex;protein folding;ATP hydrolysis activity;unfolded protein binding;ATP-dependent protein folding chaperone
Dis.W6-48549-006.v1.1AG00401.t1	GJM90474.1hypothetical protein PR202_ga06755	73			noIPR;noIPR;noIPR	MFS transporter superfamily;MFS transporter superfamily;MFS transporter superfamily
Dis.W6-48549-006.v1.1AG00402.t1	CAD6251555.1unnamed protein product	497			noIPR;noIPR;noIPR;noIPR;noIPR;noIPR;noIPR;IPR040353	Chromo-like domain superfamily;Chromo-like domain superfamily;Chromo-like domain superfamily;Chromo-like domain superfamily;Chromo-like domain superfamily;Chromo-like domain superfamily;Chromo-like domain superfamily;FLC EXPRESSOR/FLX-like	GO:0030154	cell differentiation
Dis.W6-48549-006.v1.1AG00403.t1	-	83
Dis.W6-48549-006.v1.1AG00404.t1	GJN19248.1hypothetical protein PR202_gb06500	599	EC:2.4.1	Glycosyltransferases	noIPR;IPR029044;IPR001173;noIPR;noIPR;noIPR;IPR029044	Chloride channel, core;Nucleotide-diphospho-sugar transferases;Glycosyltransferase 2-like;Glycosyltransferase 2-like;Glycosyltransferase 2-like;Glycosyltransferase 2-like;Nucleotide-diphospho-sugar transferases	GO:0000139;GO:0051753;GO:0071555	Golgi membrane;mannan synthase activity;cell wall organization
Dis.W6-48549-006.v1.1AG00405.t1	GJM90477.1hypothetical protein PR202_ga06759	273	EC:1.11.1.24	thioredoxin-dependent peroxiredoxin	noIPR;noIPR;IPR013740;noIPR;IPR037944;IPR013766;IPR037944;IPR036249	Zinc finger, CCHC-type superfamily;Zinc finger, CCHC-type superfamily;Redoxin;Redoxin;Peroxiredoxin-5-like;Thioredoxin domain;Peroxiredoxin-5-like;Thioredoxin-like superfamily	GO:0005737;GO:0008379;GO:0034599;GO:0042744;GO:0045454;GO:0098869	cytoplasm;thioredoxin peroxidase activity;cellular response to oxidative stress;hydrogen peroxide catabolic process;cell redox homeostasis;cellular oxidant detoxification
Dis.W6-48549-006.v1.1AG00406.t1	RLM79835.1protein LYK5-like	682	EC:2.7.1	Transferring phosphorus-containing groups	noIPR;IPR018392;IPR018392;IPR001245;IPR036779;noIPR;noIPR;noIPR;noIPR;noIPR;noIPR;noIPR;IPR018392;IPR000719;IPR018392;IPR011009;IPR036779	Protein kinase-like domain superfamily;LysM domain;LysM domain;Serine-threonine/tyrosine-protein kinase, catalytic domain;LysM domain superfamily;LysM domain superfamily;LysM domain superfamily;LysM domain superfamily;LysM domain superfamily;LysM domain superfamily;LysM domain superfamily;LysM domain superfamily;LysM domain;Protein kinase domain;LysM domain;Protein kinase-like domain superfamily;…	GO:0004672;GO:0005524;GO:0016020;GO:0016310	protein kinase activity;ATP binding;membrane;phosphorylation
Dis.W6-48549-006.v1.1AG00407.t1	EEC82986.1hypothetical protein OsI_28021	188	EC:3	Hydrolases	noIPR;noIPR;noIPR	Transcription factor IIA, alpha/beta subunit;Transcription factor IIA, alpha/beta subunit;Transcription factor IIA, alpha/beta subunit	GO:0000166;GO:0004386;GO:0006259;GO:0006974;GO:0016787;GO:0051276	nucleotide binding;helicase activity;DNA metabolic process;DNA damage response;hydrolase activity;chromosome organization
Dis.W6-48549-006.v1.1AG00408.t1	TVU32903.1hypothetical protein EJB05_24668	494			IPR011676;noIPR	Domain of unknown function DUF1618;Domain of unknown function DUF1618
Dis.W6-48549-006.v1.1AG00409.t1	-	171			noIPR;noIPR	Polycomb protein, VEFS-Box;Polycomb protein, VEFS-Box
Dis.W6-48549-006.v1.1AG00410.t1	-	84
Dis.W6-48549-006.v1.1AG00411.t1	GJN19252.1hypothetical protein PR202_gb06504	296			IPR025322;noIPR;noIPR;noIPR	PADRE domain;PADRE domain;PADRE domain;PADRE domain
Dis.W6-48549-006.v1.1AG00412.t1	GJM90481.1hypothetical protein PR202_ga06763	282			noIPR;noIPR;noIPR;noIPR	Cullin repeat-like-containing domain superfamily;Cullin repeat-like-containing domain superfamily;Cullin repeat-like-containing domain superfamily;Cullin repeat-like-containing domain superfamily
Dis.W6-48549-006.v1.1AG00413.t1	TVU32894.1hypothetical protein EJB05_24659	399	EC:2.7.1	Transferring phosphorus-containing groups	noIPR;IPR013212;IPR013212;noIPR;noIPR;noIPR;noIPR;IPR015661;IPR013212	Ribulose bisphosphate carboxylase, small subunit superfamily;Mad3/Bub1 homology region 1;Mad3/Bub1 homology region 1;Mad3/Bub1 homology region 1;Mad3/Bub1 homology region 1;Mad3/Bub1 homology region 1;Mad3/Bub1 homology region 1;Mitotic spindle checkpoint protein Bub1/Mad3;Mad3/Bub1 homology region 1	GO:0000776;GO:0004672;GO:0007094;GO:0051754	kinetochore;protein kinase activity;mitotic spindle assembly checkpoint signaling;meiotic sister chromatid cohesion, centromeric
Dis.W6-48549-006.v1.1AG00414.t1	TVU32906.1hypothetical protein EJB05_24671, partial	399			noIPR;noIPR;IPR019095	Protein of unknown function DUF4666;Protein of unknown function DUF4666;Mediator complex, subunit Med18	GO:0003712;GO:0006369;GO:0009723;GO:0009737;GO:0010219;GO:0016592;GO:0031554;GO:0032784;GO:0035196;GO:0045892;GO:0048440;GO:0048441;GO:0048442;GO:0048443;GO:0048510;GO:0048833;GO:0060261;GO:0070847;GO:1900150;GO:2000028;GO:2000031	transcription coregulator activity;termination of RNA polymerase II transcription;response to ethylene;response to abscisic acid;regulation of vernalization response;mediator complex;regulation of termination of DNA-templated transcription;regulation of DNA-templated transcription elongation;miRNA processing;negative regulation of DNA-templated transcription;carpel development;petal development;s…
Dis.W6-48549-006.v1.1AG00415.t1	TVU32905.1hypothetical protein EJB05_24670	490			noIPR;noIPR;noIPR;IPR001005;IPR036388;IPR032451;noIPR;IPR007526;IPR001005;noIPR;noIPR;noIPR;noIPR;noIPR;noIPR;IPR007526;IPR017930;IPR001005;IPR017884;IPR001005;IPR009057;IPR009057	Aldehyde/histidinol dehydrogenase;Aldehyde/histidinol dehydrogenase;Aldehyde/histidinol dehydrogenase;SANT/Myb domain;Winged helix-like DNA-binding domain superfamily;SMARCC, C-terminal;SMARCC, C-terminal;SWIRM domain;SANT/Myb domain;SANT/Myb domain;SANT/Myb domain;SANT/Myb domain;SANT/Myb domain;SANT/Myb domain;SANT/Myb domain;SWIRM domain;Myb domain;SANT/Myb domain;SANT domain;SANT/Myb domain;H…	GO:0003677;GO:0005634;GO:0005789;GO:0005794;GO:0006888;GO:0015031	DNA binding;nucleus;endoplasmic reticulum membrane;Golgi apparatus;endoplasmic reticulum to Golgi vesicle-mediated transport;protein transport
Dis.W6-48549-006.v1.1AG00416.t1	GJN01177.1hypothetical protein PR202_ga18422	154			noIPR	Armadillo-type fold
Dis.W6-48549-006.v1.1AG00416.t2	GJN01177.1hypothetical protein PR202_ga18422	208			noIPR	RNA-binding domain superfamily
Dis.W6-48549-006.v1.1AG00416.t3	GJN01177.1hypothetical protein PR202_ga18422	187			noIPR	RlpA-like domain superfamily
Dis.W6-48549-006.v1.1AG00417.t1	TVU32922.1hypothetical protein EJB05_24687	394	EC:1.13.11	Acting on single donors with incorporation of molecular oxygen (oxygenases). The oxygen incorporated need not be derived from O2	IPR013819;noIPR;IPR013819;noIPR;IPR000907;IPR020833;IPR020834;IPR013819;IPR036226	Lipoxygenase, C-terminal;Lipoxygenase, C-terminal;Lipoxygenase, C-terminal;Lipoxygenase, C-terminal;Lipoxygenase;Lipoxygenase, iron binding site;Lipoxygenase, conserved site;Lipoxygenase, C-terminal;Lipoxigenase, C-terminal domain superfamily	GO:0005506;GO:0006633;GO:0009737;GO:0010597;GO:0016702;GO:0031408;GO:0034440	iron ion binding;fatty acid biosynthetic process;response to abscisic acid;green leaf volatile biosynthetic process;oxidoreductase activity, acting on single donors with incorporation of molecular oxygen, incorporation of two atoms of oxygen;oxylipin biosynthetic process;lipid oxidation
Dis.W6-48549-006.v1.1AG00417.t2	TVU32922.1hypothetical protein EJB05_24687	894	EC:1.13.11.12	linoleate 13S-lipoxygenase	IPR013819;IPR001246;noIPR;noIPR;noIPR;noIPR;IPR001024;IPR027433;noIPR;noIPR;noIPR;noIPR;IPR013819;IPR001024;IPR000907;IPR020833;IPR020834;IPR013819;IPR001024;IPR042057;IPR036226;IPR036392	Lipoxygenase, C-terminal;Lipoxygenase, plant;Lipoxygenase, plant;Lipoxygenase, plant;Lipoxygenase, plant;Lipoxygenase, plant;PLAT/LH2 domain;Lipoxygenase, domain 3;Lipoxygenase, domain 3;Lipoxygenase, domain 3;Lipoxygenase, domain 3;Lipoxygenase, domain 3;Lipoxygenase, C-terminal;PLAT/LH2 domain;Lipoxygenase;Lipoxygenase, iron binding site;Lipoxygenase, conserved site;Lipoxygenase, C-terminal;PLA…	GO:0005506;GO:0006633;GO:0007623;GO:0009409;GO:0009507;GO:0009611;GO:0009620;GO:0009723;GO:0009737;GO:0009751;GO:0009753;GO:0010597;GO:0016165;GO:0031408;GO:0034440	iron ion binding;fatty acid biosynthetic process;circadian rhythm;response to cold;chloroplast;response to wounding;response to fungus;response to ethylene;response to abscisic acid;response to salicylic acid;response to jasmonic acid;green leaf volatile biosynthetic process;linoleate 13S-lipoxygenase activity;oxylipin biosynthetic process;lipid oxidation
Dis.W6-48549-006.v1.1AG00417.t3	GJM90496.1hypothetical protein PR202_ga06781	126	EC:1.13.11	Acting on single donors with incorporation of molecular oxygen (oxygenases). The oxygen incorporated need not be derived from O2	noIPR;IPR013819;IPR000907;IPR013819;IPR036226	Ribokinase-like;Lipoxygenase, C-terminal;Lipoxygenase;Lipoxygenase, C-terminal;Lipoxigenase, C-terminal domain superfamily	GO:0006633;GO:0016702;GO:0031408;GO:0034440;GO:0046872	fatty acid biosynthetic process;oxidoreductase activity, acting on single donors with incorporation of molecular oxygen, incorporation of two atoms of oxygen;oxylipin biosynthetic process;lipid oxidation;metal ion binding
Dis.W6-48549-006.v1.1AG00418.t1	GJM90497.1hypothetical protein PR202_ga06782	603			IPR006599;IPR012945;IPR016098;noIPR;noIPR;noIPR;IPR039589;IPR017901;IPR036223	CARP motif;Tubulin binding cofactor C-like domain;Cyclase-associated protein CAP/septum formation inhibitor MinC, C-terminal;Cyclase-associated protein CAP/septum formation inhibitor MinC, C-terminal;Cyclase-associated protein CAP/septum formation inhibitor MinC, C-terminal;Cyclase-associated protein CAP/septum formation inhibitor MinC, C-terminal;TBCC domain-containing protein 1;C-CAP/cofactor C…	GO:0000922;GO:0005737;GO:0005815	spindle pole;cytoplasm;microtubule organizing center
Dis.W6-48549-006.v1.1AG00419.t1	GJM90500.1hypothetical protein PR202_ga06786	228			noIPR;IPR005716;IPR023798;IPR036823;IPR000235;IPR000235;IPR020606;IPR005716;IPR036823	39S ribosomal protein L40, mitochondrial;Ribosomal protein S5/S7, eukaryotic/archaeal;Ribosomal protein S7 domain;Ribosomal protein S7 domain superfamily;Ribosomal protein S5/S7;Ribosomal protein S5/S7;Ribosomal protein S7, conserved site;Ribosomal protein S5/S7, eukaryotic/archaeal;Ribosomal protein S7 domain superfamily	GO:0000028;GO:0003729;GO:0003735;GO:0006412;GO:0019843;GO:0022627	ribosomal small subunit assembly;mRNA binding;structural constituent of ribosome;translation;rRNA binding;cytosolic small ribosomal subunit
Dis.W6-48549-006.v1.1AG00420.t1	GJM90501.1hypothetical protein PR202_ga06787	487			IPR012878;noIPR;noIPR	Beta-L-arabinofuranosidase, GH127;Beta-L-arabinofuranosidase, GH127;Beta-L-arabinofuranosidase, GH127
Dis.W6-48549-006.v1.1AG00421.t1	KAG2649205.1hypothetical protein PVAP13_1NG089000, partial	275			noIPR;IPR002653;IPR000058;IPR035896;noIPR;IPR002653;IPR000058;noIPR;noIPR;noIPR;IPR002653;IPR000058;noIPR;IPR035896	Protein of unknown function DUF3339;Zinc finger, A20-type;Zinc finger, AN1-type;AN1-like Zinc finger;AN1-like Zinc finger;Zinc finger, A20-type;Zinc finger, AN1-type;Zinc finger, AN1-type;Zinc finger, AN1-type;Zinc finger, AN1-type;Zinc finger, A20-type;Zinc finger, AN1-type;Zinc finger, AN1-type;AN1-like Zinc finger	GO:0003677;GO:0008270	DNA binding;zinc ion binding
Dis.W6-48549-006.v1.1AG00422.t1	PUZ74505.1hypothetical protein GQ55_1G070900	285			noIPR;IPR001623;IPR001623;IPR036869;IPR001623;noIPR;noIPR;noIPR;noIPR;IPR042977;IPR001623;IPR001623;IPR036869	Uncharacterized protein At5g03900-like;DnaJ domain;DnaJ domain;Chaperone J-domain superfamily;DnaJ domain;DnaJ domain;DnaJ domain;DnaJ domain;DnaJ domain;Chaperone protein AtJ6-like;DnaJ domain;DnaJ domain;Chaperone J-domain superfamily	GO:0005783	endoplasmic reticulum
Dis.W6-48549-006.v1.1AG00422.t2	TVU32916.1hypothetical protein EJB05_24681, partial	339			noIPR;IPR001623;IPR001623;IPR036869;IPR001623;noIPR;noIPR;noIPR;IPR042977;IPR001623;IPR001623;IPR036869	Basic-leucine zipper domain superfamily;DnaJ domain;DnaJ domain;Chaperone J-domain superfamily;DnaJ domain;DnaJ domain;DnaJ domain;DnaJ domain;Chaperone protein AtJ6-like;DnaJ domain;DnaJ domain;Chaperone J-domain superfamily	GO:0005783	endoplasmic reticulum
Dis.W6-48549-006.v1.1AG00423.t1	-	110			IPR044702	Arabinogalactan protein 23/40
Dis.W6-48549-006.v1.1AG00424.t1	TVU32937.1hypothetical protein EJB05_24702	654			noIPR;noIPR;noIPR;noIPR;IPR000184;noIPR;IPR010827;noIPR;noIPR;noIPR;IPR039910;IPR034746	Reverse transcriptase, RNA-dependent DNA polymerase;Reverse transcriptase, RNA-dependent DNA polymerase;Reverse transcriptase, RNA-dependent DNA polymerase;Reverse transcriptase, RNA-dependent DNA polymerase;Bacterial surface antigen (D15);Bacterial surface antigen (D15);POTRA domain, BamA/TamA-like;POTRA domain, BamA/TamA-like;POTRA domain, BamA/TamA-like;POTRA domain, BamA/TamA-like;Surface ant…	GO:0009527;GO:0009658;GO:0009793;GO:0009941	plastid outer membrane;chloroplast organization;embryo development ending in seed dormancy;chloroplast envelope
Dis.W6-48549-006.v1.1AG00425.t1	-	86			noIPR;noIPR	NAC domain superfamily;NAC domain superfamily
Dis.W6-48549-006.v1.1AG00426.t1	TVU32934.1hypothetical protein EJB05_24699, partial	399	EC:3.2.1.15	endo-polygalacturonase	noIPR;IPR006626;IPR012334;IPR000743;noIPR;IPR000743;IPR011050	RNA-binding domain superfamily;Parallel beta-helix repeat;Pectin lyase fold;Glycoside hydrolase, family 28;Glycoside hydrolase, family 28;Glycoside hydrolase, family 28;Pectin lyase fold/virulence factor	GO:0004650;GO:0005975	polygalacturonase activity;carbohydrate metabolic process
Dis.W6-48549-006.v1.1AG00427.t1	TVU32938.1hypothetical protein EJB05_24703, partial	474	EC:3.7.1.2	fumarylacetoacetase	noIPR;noIPR;IPR015377;IPR036462;IPR011234;IPR005959;IPR036663;IPR005959;IPR036663;IPR036462	NADP-dependent oxidoreductase domain superfamily;NADP-dependent oxidoreductase domain superfamily;Fumarylacetoacetase, N-terminal;Fumarylacetoacetase, N-terminal domain superfamily;Fumarylacetoacetase-like, C-terminal;Fumarylacetoacetase;Fumarylacetoacetase-like, C-terminal domain superfamily;Fumarylacetoacetase;Fumarylacetoacetase-like, C-terminal domain superfamily;Fumarylacetoacetase, N-termin…	GO:0004334;GO:0006559;GO:0006572;GO:0046872;GO:1902000	fumarylacetoacetase activity;L-phenylalanine catabolic process;tyrosine catabolic process;metal ion binding;homogentisate catabolic process
Dis.W6-48549-006.v1.1AG00428.t1	XP_044952861.13-oxoacyl-[acyl-carrier-protein] synthase, mitochondrial	288	EC:2.3.1	Acyltransferases	IPR020841;IPR016039;IPR014031;IPR016039;IPR014030;noIPR;noIPR;IPR000794;IPR020841;IPR000794;IPR016039;IPR016039	Polyketide synthase, beta-ketoacyl synthase domain;Thiolase-like;Beta-ketoacyl synthase, C-terminal;Thiolase-like;Beta-ketoacyl synthase, N-terminal;Beta-ketoacyl synthase, N-terminal;Beta-ketoacyl synthase, N-terminal;Beta-ketoacyl synthase;Polyketide synthase, beta-ketoacyl synthase domain;Beta-ketoacyl synthase;Thiolase-like;Thiolase-like	GO:0006631;GO:0016747	fatty acid metabolic process;acyltransferase activity, transferring groups other than amino-acyl groups
Dis.W6-48549-006.v1.1AG00428.t2	XP_044952861.13-oxoacyl-[acyl-carrier-protein] synthase, mitochondrial	289	EC:2.3.1	Acyltransferases	IPR020841;IPR016039;IPR014030;IPR016039;IPR014031;noIPR;noIPR;IPR000794;IPR020841;IPR000794;IPR016039;IPR016039	Polyketide synthase, beta-ketoacyl synthase domain;Thiolase-like;Beta-ketoacyl synthase, N-terminal;Thiolase-like;Beta-ketoacyl synthase, C-terminal;Beta-ketoacyl synthase, C-terminal;Beta-ketoacyl synthase, C-terminal;Beta-ketoacyl synthase;Polyketide synthase, beta-ketoacyl synthase domain;Beta-ketoacyl synthase;Thiolase-like;Thiolase-like	GO:0006631;GO:0016747	fatty acid metabolic process;acyltransferase activity, transferring groups other than amino-acyl groups
Dis.W6-48549-006.v1.1AG00429.t1	GJM90516.1hypothetical protein PR202_ga06803	196	EC:2.3.1.41	beta-ketoacyl-[acyl-carrier-protein] synthase I	noIPR;IPR016039;IPR014030;noIPR;IPR016039	Protein Networked (NET), actin-binding (NAB) domain;Thiolase-like;Beta-ketoacyl synthase, N-terminal;Beta-ketoacyl synthase, N-terminal;Thiolase-like	GO:0004315;GO:0005739;GO:0006633	3-oxoacyl-[acyl-carrier-protein] synthase activity;mitochondrion;fatty acid biosynthetic process
Dis.W6-48549-006.v1.1AG00430.t1	-	115			noIPR;noIPR	Ankyrin repeat-containing domain superfamily;Ankyrin repeat-containing domain superfamily
Dis.W6-48549-006.v1.1AG00431.t1	BAO51917.1lateral suppressor	439			IPR005202;IPR005202;IPR005202	Transcription factor GRAS;Transcription factor GRAS;Transcription factor GRAS	GO:0003700;GO:0005634;GO:0006355;GO:0010014;GO:0043565	DNA-binding transcription factor activity;nucleus;regulation of DNA-templated transcription;meristem initiation;sequence-specific DNA binding
Dis.W6-48549-006.v1.1AG00432.t1	TVU32931.1hypothetical protein EJB05_24696	370			noIPR;IPR002048;IPR002048;IPR002048;noIPR;noIPR;noIPR;noIPR;IPR018247;IPR018247;IPR002048;IPR002048;IPR002048;IPR002048;IPR002048;IPR011992	Cytidine deaminase-like;EF-hand domain;EF-hand domain;EF-hand domain;EF-hand domain;EF-hand domain;EF-hand domain;EF-hand domain;EF-Hand 1, calcium-binding site;EF-Hand 1, calcium-binding site;EF-hand domain;EF-hand domain;EF-hand domain;EF-hand domain;EF-hand domain;EF-hand domain pair	GO:0005509;GO:0030234	calcium ion binding;enzyme regulator activity
Dis.W6-48549-006.v1.1AG00433.t1	-	73
Dis.W6-48549-006.v1.1AG00434.t1	TKW37439.1hypothetical protein SEVIR_1G047451v2	75
Dis.W6-48549-006.v1.1AG00435.t1	GJM90520.1hypothetical protein PR202_ga06807	145			noIPR	Homeobox-like domain superfamily
Dis.W6-48549-006.v1.1AG00436.t1	KAJ1278386.1hypothetical protein BS78_04G075500	406	EC:3.4.23	Acting on peptide bonds (peptidases)	noIPR;IPR015940;IPR000626;IPR015940;IPR000626;noIPR;IPR019103;IPR021109;noIPR;noIPR;noIPR;noIPR;IPR000626;IPR015940;IPR019103;noIPR;IPR033882;IPR021109;IPR009060;IPR029071	RING-H2 finger protein ATL1/ATL16-like;Ubiquitin-associated domain;Ubiquitin-like domain;Ubiquitin-associated domain;Ubiquitin-like domain;Ubiquitin-like domain;Aspartic peptidase, DDI1-type;Aspartic peptidase domain superfamily;Aspartic peptidase domain superfamily;Aspartic peptidase domain superfamily;Aspartic peptidase domain superfamily;Aspartic peptidase domain superfamily;Ubiquitin-like dom…	GO:0004190;GO:0005634;GO:0006508;GO:0016020;GO:0031593	aspartic-type endopeptidase activity;nucleus;proteolysis;membrane;polyubiquitin modification-dependent protein binding
Dis.W6-48549-006.v1.1AG00437.t1	GJM90526.1hypothetical protein PR202_ga06813	796	EC:3.4.21	Acting on peptide bonds (peptidases)	IPR015500;noIPR;noIPR;noIPR;noIPR;noIPR;IPR037045;IPR010259;noIPR;IPR000209;IPR041469;IPR036852;IPR003137;noIPR;IPR045051;IPR023828;noIPR;IPR034197;noIPR;IPR046450;IPR036852	Peptidase S8, subtilisin-related;Peptidase S8, subtilisin-related;Peptidase S8, subtilisin-related;Peptidase S8, subtilisin-related;Peptidase S8, subtilisin-related;Peptidase S8, subtilisin-related;Peptidase S8 propeptide/proteinase inhibitor I9 superfamily;Peptidase S8 propeptide/proteinase inhibitor I9;Peptidase S8 propeptide/proteinase inhibitor I9;Peptidase S8/S53 domain;Subtilisin-like prote…	GO:0004252;GO:0006508	serine-type endopeptidase activity;proteolysis
Dis.W6-48549-006.v1.1AG00438.t1	TVU32944.1hypothetical protein EJB05_24709	296			IPR008586;IPR008586	Protein of unknown function DUF868, plant;Protein of unknown function DUF868, plant
Dis.W6-48549-006.v1.1AG00439.t1	GJM90528.1hypothetical protein PR202_ga06815	192	EC:3.4	Acting on peptide bonds (peptidases)	noIPR;IPR014719;IPR013823;IPR000206;IPR000206;IPR014719	P-loop containing nucleoside triphosphate hydrolase;Ribosomal protein L7/L12, C-terminal/adaptor protein ClpS-like;Ribosomal protein L7/L12, C-terminal;Ribosomal protein L7/L12;Ribosomal protein L7/L12;Ribosomal protein L7/L12, C-terminal/adaptor protein ClpS-like	GO:0003729;GO:0003735;GO:0005840;GO:0006412;GO:0006508;GO:0008233;GO:1990904	mRNA binding;structural constituent of ribosome;ribosome;translation;proteolysis;peptidase activity;ribonucleoprotein complex
Dis.W6-48549-006.v1.1AG00440.t1	TVU09487.1hypothetical protein EJB05_42963, partial	183			IPR036388;noIPR;noIPR;noIPR;IPR036390	Winged helix-like DNA-binding domain superfamily;Winged helix-like DNA-binding domain superfamily;Winged helix-like DNA-binding domain superfamily;Winged helix-like DNA-binding domain superfamily;Winged helix DNA-binding domain superfamily	GO:0000785;GO:0003690;GO:0005730;GO:0030261;GO:0031492;GO:0045910	chromatin;double-stranded DNA binding;nucleolus;chromosome condensation;nucleosomal DNA binding;negative regulation of DNA recombination
Dis.W6-48549-006.v1.1AG00441.t1	RLN09296.1hypothetical protein C2845_PM11G20320	1186			IPR002885;IPR011990;IPR002885;IPR011990;IPR011990;IPR044578;IPR002885;IPR002885	Pentatricopeptide repeat;Tetratricopeptide-like helical domain superfamily;Pentatricopeptide repeat;Tetratricopeptide-like helical domain superfamily;Tetratricopeptide-like helical domain superfamily;Pentatricopeptide repeat-containing protein BIR6-like;Pentatricopeptide repeat;Pentatricopeptide repeat	GO:0008380	RNA splicing
Dis.W6-48549-006.v1.1AG00442.t1	-	121
Dis.W6-48549-006.v1.1AG00443.t1	TVU32954.1hypothetical protein EJB05_24719	400	EC:3.4;EC:5.6.1.5;EC:3.6.1.15	Acting on peptide bonds (peptidases);proteasome ATPase;nucleoside-triphosphate phosphatase	noIPR;noIPR;noIPR;noIPR;IPR003593;IPR032501;noIPR;IPR003959;IPR041569;IPR012340;IPR027417;IPR005937;noIPR;noIPR;IPR003960;IPR027417	Pectin lyase fold/virulence factor;Pectin lyase fold/virulence factor;Pectin lyase fold/virulence factor;Pectin lyase fold/virulence factor;AAA+ ATPase domain;Proteasomal ATPase OB C-terminal domain;Proteasomal ATPase OB C-terminal domain;ATPase, AAA-type, core;AAA ATPase, AAA+ lid domain;Nucleic acid-binding, OB-fold;P-loop containing nucleoside triphosphate hydrolase;26S proteasome regulatory s…	GO:0005515;GO:0005524;GO:0005634;GO:0008233;GO:0008540;GO:0016887;GO:0031597;GO:0036402;GO:0045899;GO:1901800	protein binding;ATP binding;nucleus;peptidase activity;proteasome regulatory particle, base subcomplex;ATP hydrolysis activity;cytosolic proteasome complex;proteasome-activating activity;positive regulation of RNA polymerase II transcription preinitiation complex assembly;positive regulation of proteasomal protein catabolic process
Dis.W6-48549-006.v1.1AG00444.t1	TVU32947.1hypothetical protein EJB05_24712, partial	328			IPR001251;IPR011074;IPR036865;IPR001251;IPR011074;noIPR;IPR001251;IPR001251;IPR036865;IPR036273	CRAL-TRIO lipid binding domain;CRAL/TRIO, N-terminal domain;CRAL-TRIO lipid binding domain superfamily;CRAL-TRIO lipid binding domain;CRAL/TRIO, N-terminal domain;CRAL/TRIO, N-terminal domain;CRAL-TRIO lipid binding domain;CRAL-TRIO lipid binding domain;CRAL-TRIO lipid binding domain superfamily;CRAL/TRIO, N-terminal domain superfamily
Dis.W6-48549-006.v1.1AG00445.t1	TVU32949.1hypothetical protein EJB05_24714, partial	407	EC:3.2.1	Glycosylases	noIPR;noIPR;IPR000490;IPR044965;IPR017853	WD40-repeat-containing domain superfamily;WD40-repeat-containing domain superfamily;Glycoside hydrolase family 17;Glycoside hydrolase family 17, plant;Glycoside hydrolase superfamily	GO:0004553;GO:0005975;GO:0016020	hydrolase activity, hydrolyzing O-glycosyl compounds;carbohydrate metabolic process;membrane
Dis.W6-48549-006.v1.1AG00446.t1	-	159
Dis.W6-48549-006.v1.1AG00447.t1	GJM90539.1hypothetical protein PR202_ga06827	778			noIPR;noIPR;noIPR;IPR006553;IPR001611;IPR032675;IPR032675;noIPR;noIPR;noIPR;noIPR;noIPR;IPR036047;noIPR	Zinc finger, RING-type;Zinc finger, RING-type;Zinc finger, RING-type;Leucine-rich repeat, cysteine-containing subtype;Leucine-rich repeat;Leucine-rich repeat domain superfamily;Leucine-rich repeat domain superfamily;Leucine-rich repeat domain superfamily;Leucine-rich repeat domain superfamily;Leucine-rich repeat domain superfamily;Leucine-rich repeat domain superfamily;Leucine-rich repeat domain …	GO:0019005;GO:0031146	SCF ubiquitin ligase complex;SCF-dependent proteasomal ubiquitin-dependent protein catabolic process
Dis.W6-48549-006.v1.1AG00448.t1	-	111			noIPR	Ribosomal protein L4 domain superfamily
Dis.W6-48549-006.v1.1AG00449.t1	TVU32967.1hypothetical protein EJB05_24734, partial	222			IPR002068;IPR008978;noIPR;IPR044587;IPR002068;noIPR;IPR008978	Alpha crystallin/Hsp20 domain;HSP20-like chaperone;HSP20-like chaperone;Heat shock protein 21-like;Alpha crystallin/Hsp20 domain;Alpha crystallin/Hsp20 domain;HSP20-like chaperone	GO:0009408	response to heat
Dis.W6-48549-006.v1.1AG00450.t1	-	109
Dis.W6-48549-006.v1.1AG00450.t2	-	71
Dis.W6-48549-006.v1.1AG00451.t1	TVU32965.1hypothetical protein EJB05_24732	178			IPR025124;noIPR	Domain of unknown function DUF4050;Domain of unknown function DUF4050
Dis.W6-48549-006.v1.1AG00451.t2	TVU32964.1hypothetical protein EJB05_24731	114			IPR025124;noIPR;noIPR	Domain of unknown function DUF4050;Domain of unknown function DUF4050;Domain of unknown function DUF4050
Dis.W6-48549-006.v1.1AG00452.t1	-	78			noIPR	P-loop containing nucleoside triphosphate hydrolase
Dis.W6-48549-006.v1.1AG00453.t1	TVU32961.1hypothetical protein EJB05_24728	136			noIPR;noIPR;noIPR;noIPR	Translation protein, beta-barrel domain superfamily;Translation protein, beta-barrel domain superfamily;Translation protein, beta-barrel domain superfamily;Translation protein, beta-barrel domain superfamily
Dis.W6-48549-006.v1.1AG00454.t1	-	168			noIPR	FAD/NAD(P)-binding domain superfamily
Dis.W6-48549-006.v1.1AG00455.t1	-	66
Dis.W6-48549-006.v1.1AG00456.t1	RRT62448.1hypothetical protein B296_00025359	149
Dis.W6-48549-006.v1.1AG00457.t1	TVU32973.1hypothetical protein EJB05_24741, partial	592	EC:3.6.4.13	RNA helicase	noIPR;IPR001650;IPR014001;IPR011545;IPR027417;IPR027417;IPR007529;noIPR;IPR001650;noIPR;noIPR;noIPR;IPR014001;noIPR;IPR001650;IPR014014;noIPR;IPR027417;IPR027417	Armadillo-type fold;Helicase, C-terminal;Helicase superfamily 1/2, ATP-binding domain;DEAD/DEAH box helicase domain;P-loop containing nucleoside triphosphate hydrolase;P-loop containing nucleoside triphosphate hydrolase;Zinc finger, HIT-type;Zinc finger, HIT-type;Helicase, C-terminal;Helicase, C-terminal;Helicase, C-terminal;Helicase, C-terminal;Helicase superfamily 1/2, ATP-binding domain;Helica…	GO:0003723;GO:0003724;GO:0005524;GO:0016787	RNA binding;RNA helicase activity;ATP binding;hydrolase activity
Dis.W6-48549-006.v1.1AG00458.t1	TVU02509.1hypothetical protein EJB05_51994	262			IPR004331;noIPR;IPR031142;IPR004331;noIPR	SPX domain;SPX domain;SPX domain-containing protein;SPX domain;SPX domain	GO:0005634;GO:0051511;GO:0070417;GO:0080040;GO:2000024	nucleus;negative regulation of unidimensional cell growth;cellular response to cold;positive regulation of cellular response to phosphate starvation;regulation of leaf development
Dis.W6-48549-006.v1.1AG00459.t1	-	69
Dis.W6-48549-006.v1.1AG00460.t1	GJN19283.1hypothetical protein PR202_gb06541	455			noIPR;noIPR;IPR006597;IPR006597;IPR002775;IPR036882;IPR011990;noIPR;noIPR;IPR036882	Glutamine-Leucine-Glutamine, QLQ;Glutamine-Leucine-Glutamine, QLQ;Sel1-like repeat;Sel1-like repeat;DNA/RNA-binding protein Alba-like;Alba-like domain superfamily;Tetratricopeptide-like helical domain superfamily;Tetratricopeptide-like helical domain superfamily;Tetratricopeptide-like helical domain superfamily;Alba-like domain superfamily	GO:0005739	mitochondrion
Dis.W6-48549-006.v1.1AG00461.t1	PUZ74595.1hypothetical protein GQ55_1G077700	423			IPR006652;IPR001810;IPR015915;IPR006652;IPR045887;noIPR;IPR015915;IPR036047	Kelch repeat type 1;F-box domain;Kelch-type beta propeller;Kelch repeat type 1;Kelch repeat F-box protein SAGL1-like;Kelch repeat F-box protein SAGL1-like;Kelch-type beta propeller;F-box-like domain superfamily	GO:0003677;GO:0003700;GO:0006355	DNA binding;DNA-binding transcription factor activity;regulation of DNA-templated transcription
Dis.W6-48549-006.v1.1AG00462.t1	XP_004951525.1transcription factor HY5	200			noIPR;noIPR;noIPR;IPR004827;IPR004827;noIPR;noIPR;noIPR;noIPR;IPR044280;IPR004827;IPR004827;noIPR;IPR046347	Ribonuclease H-like superfamily;Ribonuclease H-like superfamily;Ribonuclease H-like superfamily;Basic-leucine zipper domain;Basic-leucine zipper domain;Basic-leucine zipper domain;Basic-leucine zipper domain;Basic-leucine zipper domain;Basic-leucine zipper domain;Transcriptional activator Hac1/HY5;Basic-leucine zipper domain;Basic-leucine zipper domain;Basic-leucine zipper domain;Basic-leucine zi…	GO:0000981;GO:0003677;GO:0005634;GO:0010017;GO:0010099;GO:0010114;GO:0010218;GO:0045944	DNA-binding transcription factor activity, RNA polymerase II-specific;DNA binding;nucleus;red or far-red light signaling pathway;regulation of photomorphogenesis;response to red light;response to far red light;positive regulation of transcription by RNA polymerase II
Dis.W6-48549-006.v1.1AG00463.t1	TVU32991.1hypothetical protein EJB05_24759, partial	176			noIPR;noIPR;IPR001876;noIPR;IPR001876;noIPR;IPR001876;IPR001876;IPR001876;IPR001876;IPR001876;IPR036443;IPR036443;IPR036443	Alpha/Beta hydrolase fold;Alpha/Beta hydrolase fold;Zinc finger, RanBP2-type;Zinc finger, RanBP2-type;Zinc finger, RanBP2-type;Zinc finger, RanBP2-type;Zinc finger, RanBP2-type;Zinc finger, RanBP2-type;Zinc finger, RanBP2-type;Zinc finger, RanBP2-type;Zinc finger, RanBP2-type;Zinc finger, RanBP2-type superfamily;Zinc finger, RanBP2-type superfamily;Zinc finger, RanBP2-type superfamily	GO:0003729;GO:0003743;GO:0005737;GO:0006413;GO:0046872	mRNA binding;translation initiation factor activity;cytoplasm;translational initiation;metal ion binding
Dis.W6-48549-006.v1.1AG00463.t2	TVU32991.1hypothetical protein EJB05_24759, partial	184			noIPR;noIPR;IPR001876;IPR001876;noIPR;noIPR;IPR001876;IPR001876;IPR001876;IPR001876;IPR001876;IPR036443;IPR036443;IPR036443	Glycoside hydrolase superfamily;Glycoside hydrolase superfamily;Zinc finger, RanBP2-type;Zinc finger, RanBP2-type;Zinc finger, RanBP2-type;Zinc finger, RanBP2-type;Zinc finger, RanBP2-type;Zinc finger, RanBP2-type;Zinc finger, RanBP2-type;Zinc finger, RanBP2-type;Zinc finger, RanBP2-type;Zinc finger, RanBP2-type superfamily;Zinc finger, RanBP2-type superfamily;Zinc finger, RanBP2-type superfamily	GO:0003729;GO:0003743;GO:0005737;GO:0006413;GO:0046872	mRNA binding;translation initiation factor activity;cytoplasm;translational initiation;metal ion binding
Dis.W6-48549-006.v1.1AG00464.t1	TVU32987.1hypothetical protein EJB05_24755, partial	549	EC:1.14	Acting on paired donors, with incorporation or reduction of molecular oxygen. The oxygen incorporated need not be derived from O2	IPR002401;IPR001128;noIPR;IPR001128;IPR036396;noIPR;noIPR;noIPR;IPR017972;noIPR;IPR036396	Cytochrome P450, E-class, group I;Cytochrome P450;Cytochrome P450;Cytochrome P450;Cytochrome P450 superfamily;Cytochrome P450 superfamily;Cytochrome P450 superfamily;Cytochrome P450 superfamily;Cytochrome P450, conserved site;Cytochrome P450, conserved site;Cytochrome P450 superfamily	GO:0004497;GO:0005506;GO:0010268;GO:0016020;GO:0016131;GO:0016705;GO:0020037	monooxygenase activity;iron ion binding;brassinosteroid homeostasis;membrane;brassinosteroid metabolic process;oxidoreductase activity, acting on paired donors, with incorporation or reduction of molecular oxygen;heme binding
Dis.W6-48549-006.v1.1AG00465.t1	PUZ74608.1hypothetical protein GQ55_1G078700	372			noIPR;IPR006946;noIPR;noIPR;IPR008979	Protein kinase-like domain superfamily;DUF642 L-galactono-1,4-lactone-responsive gene 2-like domain;DUF642 L-galactono-1,4-lactone-responsive gene 2-like domain;DUF642 L-galactono-1,4-lactone-responsive gene 2-like domain;Galactose-binding-like domain superfamily
Dis.W6-48549-006.v1.1AG00465.t2	GJN19292.1hypothetical protein PR202_gb06552	355			noIPR;IPR006946;noIPR;noIPR;IPR008979	Bifunctional inhibitor/plant lipid transfer protein/seed storage helical domain superfamily;DUF642 L-galactono-1,4-lactone-responsive gene 2-like domain;DUF642 L-galactono-1,4-lactone-responsive gene 2-like domain;DUF642 L-galactono-1,4-lactone-responsive gene 2-like domain;Galactose-binding-like domain superfamily
Dis.W6-48549-006.v1.1AG00466.t1	TVU32989.1hypothetical protein EJB05_24757	479	EC:3.4;EC:5.6.1.5;EC:3.6.1.15	Acting on peptide bonds (peptidases);proteasome ATPase;nucleoside-triphosphate phosphatase	noIPR;noIPR;noIPR;noIPR;IPR003593;IPR005937;IPR027417;noIPR;IPR032501;IPR012340;IPR041569;IPR003959;noIPR;noIPR;noIPR;noIPR;noIPR;IPR003960;noIPR;IPR027417	Protein of unknown function DUF1639;Protein of unknown function DUF1639;Protein of unknown function DUF1639;Protein of unknown function DUF1639;AAA+ ATPase domain;26S proteasome regulatory subunit P45-like;P-loop containing nucleoside triphosphate hydrolase;P-loop containing nucleoside triphosphate hydrolase;Proteasomal ATPase OB C-terminal domain;Nucleic acid-binding, OB-fold;AAA ATPase, AAA+ li…	GO:0005524;GO:0005634;GO:0008233;GO:0008540;GO:0016887;GO:0036402;GO:0043161;GO:1901800	ATP binding;nucleus;peptidase activity;proteasome regulatory particle, base subcomplex;ATP hydrolysis activity;proteasome-activating activity;proteasome-mediated ubiquitin-dependent protein catabolic process;positive regulation of proteasomal protein catabolic process
Dis.W6-48549-006.v1.1AG00467.t1	GJN19301.1hypothetical protein PR202_gb06562	502			noIPR;noIPR;noIPR	Fatty acid hydroxylase;Fatty acid hydroxylase;Fatty acid hydroxylase
Dis.W6-48549-006.v1.1AG00467.t2	GJN19301.1hypothetical protein PR202_gb06562	492			noIPR;noIPR;noIPR	SS18 family;SS18 family;SS18 family
Dis.W6-48549-006.v1.1AG00467.t3	GJN19301.1hypothetical protein PR202_gb06562	493			noIPR;noIPR;noIPR	MULE transposase domain;MULE transposase domain;MULE transposase domain
Dis.W6-48549-006.v1.1AG00468.t1	OEL28369.1UDP-glycosyltransferase 73D1	513	EC:2.4.1	Glycosyltransferases	noIPR;noIPR;noIPR;IPR002213;noIPR;IPR002213;noIPR	EF-hand domain pair;EF-hand domain pair;EF-hand domain pair;UDP-glucuronosyl/UDP-glucosyltransferase;UDP-glucuronosyl/UDP-glucosyltransferase;UDP-glucuronosyl/UDP-glucosyltransferase;UDP-glucuronosyl/UDP-glucosyltransferase	GO:0035251	UDP-glucosyltransferase activity
Dis.W6-48549-006.v1.1AG00469.t1	TVU32994.1hypothetical protein EJB05_24762, partial	688			IPR004667;IPR004667;noIPR;noIPR;IPR004667	ADP/ATP carrier protein, bacterial type;ADP/ATP carrier protein, bacterial type;ADP/ATP carrier protein, bacterial type;ADP/ATP carrier protein, bacterial type;ADP/ATP carrier protein, bacterial type	GO:0005471;GO:0005524;GO:0015866;GO:0015867;GO:0031969	ATP:ADP antiporter activity;ATP binding;ADP transport;ATP transport;chloroplast membrane
Dis.W6-48549-006.v1.1AG00470.t1	TVU32995.1hypothetical protein EJB05_24764, partial	451			noIPR;noIPR;noIPR;IPR000504;noIPR;IPR012677;IPR000504;noIPR;noIPR;IPR000504;noIPR;IPR035979	Homeobox-like domain superfamily;Homeobox-like domain superfamily;Homeobox-like domain superfamily;RNA recognition motif domain;RNA recognition motif domain;Nucleotide-binding alpha-beta plait domain superfamily;RNA recognition motif domain;RNA recognition motif domain;RNA recognition motif domain;RNA recognition motif domain;RNA recognition motif domain;RNA-binding domain superfamily	GO:0003723	RNA binding
Dis.W6-48549-006.v1.1AG00471.t1	GJM90574.1hypothetical protein PR202_ga06870	1421	EC:7.2.2;EC:3.6.1.15	Catalysing the translocation of inorganic cations;nucleoside-triphosphate phosphatase	noIPR;noIPR;IPR003593;IPR013525;IPR013581;IPR029481;IPR043926;IPR003439;IPR003439;IPR027417;IPR027417;noIPR;IPR003439;IPR003439;IPR034001;IPR034003;IPR027417;IPR027417	Zinc finger, RING/FYVE/PHD-type;Zinc finger, RING/FYVE/PHD-type;AAA+ ATPase domain;ABC-2 type transporter;Plant PDR ABC transporter associated;ABC-transporter, N-terminal domain;ABC transporter family G domain;ABC transporter-like, ATP-binding domain;ABC transporter-like, ATP-binding domain;P-loop containing nucleoside triphosphate hydrolase;P-loop containing nucleoside triphosphate hydrolase;P-l…	GO:0005524;GO:0016020;GO:0016887;GO:0055085;GO:0140359	ATP binding;membrane;ATP hydrolysis activity;transmembrane transport;ABC-type transporter activity
Dis.W6-48549-006.v1.1AG00472.t1	TVU33001.1hypothetical protein EJB05_24772	1224			IPR003618;IPR003618;IPR012921;IPR036575;noIPR;noIPR;noIPR;noIPR;noIPR;noIPR;noIPR;noIPR;noIPR;noIPR;noIPR;noIPR;noIPR;noIPR;noIPR;IPR003618;noIPR;IPR036575	Transcription elongation factor S-II, central domain;Transcription elongation factor S-II, central domain;Spen paralogue and orthologue SPOC, C-terminal;Transcription elongation factor S-II, central domain superfamily;Transcription elongation factor S-II, central domain superfamily;Transcription elongation factor S-II, central domain superfamily;Transcription elongation factor S-II, central domai…	GO:0005634;GO:0006351	nucleus;DNA-templated transcription
Dis.W6-48549-006.v1.1AG00473.t1	GJM90576.1hypothetical protein PR202_ga06873	366			IPR006652;IPR015915;IPR001810;IPR006652;IPR044595;noIPR;IPR015915;IPR036047	Kelch repeat type 1;Kelch-type beta propeller;F-box domain;Kelch repeat type 1;F-box/kelch-repeat protein KMD1-4;F-box/kelch-repeat protein KMD1-4;Kelch-type beta propeller;F-box-like domain superfamily	GO:0080037;GO:2000762	negative regulation of cytokinin-activated signaling pathway;regulation of phenylpropanoid metabolic process
Dis.W6-48549-006.v1.1AG00474.t1	TVU33000.1hypothetical protein EJB05_24771, partial	773	EC:3.6.1.15	nucleoside-triphosphate phosphatase	IPR001164;noIPR;IPR001164;IPR038508;IPR001164;noIPR;noIPR;noIPR;noIPR;noIPR;noIPR;noIPR;noIPR;noIPR;noIPR;noIPR;noIPR;noIPR;IPR044820;IPR001164;noIPR;IPR037278	Arf GTPase activating protein;Arf GTPase activating protein;Arf GTPase activating protein;ArfGAP domain superfamily;Arf GTPase activating protein;Arf GTPase activating protein;Arf GTPase activating protein;Arf GTPase activating protein;Arf GTPase activating protein;Arf GTPase activating protein;Arf GTPase activating protein;Arf GTPase activating protein;Arf GTPase activating protein;Arf GTPase ac…	GO:0003924;GO:0005096;GO:0005525;GO:0005737;GO:0006913;GO:0009615	GTPase activity;GTPase activator activity;GTP binding;cytoplasm;nucleocytoplasmic transport;response to virus
Dis.W6-48549-006.v1.1AG00474.t2	TVU33000.1hypothetical protein EJB05_24771, partial	771	EC:3.6.1.15	nucleoside-triphosphate phosphatase	IPR001164;noIPR;IPR001164;IPR001164;IPR038508;noIPR;noIPR;noIPR;noIPR;noIPR;noIPR;noIPR;noIPR;noIPR;noIPR;noIPR;noIPR;noIPR;IPR044820;IPR001164;noIPR;IPR037278	Arf GTPase activating protein;Arf GTPase activating protein;Arf GTPase activating protein;Arf GTPase activating protein;ArfGAP domain superfamily;ArfGAP domain superfamily;ArfGAP domain superfamily;ArfGAP domain superfamily;ArfGAP domain superfamily;ArfGAP domain superfamily;ArfGAP domain superfamily;ArfGAP domain superfamily;ArfGAP domain superfamily;ArfGAP domain superfamily;ArfGAP domain super…	GO:0003924;GO:0005096;GO:0005525;GO:0005737;GO:0006913;GO:0009615	GTPase activity;GTPase activator activity;GTP binding;cytoplasm;nucleocytoplasmic transport;response to virus
Dis.W6-48549-006.v1.1AG00475.t1	XP_034585427.1coatomer subunit beta'-2-like	932			IPR020472;noIPR;noIPR;IPR001680;noIPR;IPR006692;IPR015943;IPR001680;IPR016453;noIPR;noIPR;noIPR;noIPR;IPR001680;IPR001680;noIPR;IPR001680;IPR001680;noIPR;IPR001680;noIPR;noIPR;noIPR;IPR036322;IPR036322	G-protein beta WD-40 repeat;G-protein beta WD-40 repeat;G-protein beta WD-40 repeat;WD40 repeat;WD40 repeat;Coatomer, WD associated region;WD40/YVTN repeat-like-containing domain superfamily;WD40 repeat;Coatomer beta' subunit (COPB2);Coatomer beta' subunit (COPB2);Coatomer beta' subunit (COPB2);Coatomer beta' subunit (COPB2);Coatomer beta' subunit (COPB2);WD40 repeat;WD40 repeat;WD40 repeat;WD40 …	GO:0000139;GO:0005198;GO:0006886;GO:0006888;GO:0006890;GO:0006891;GO:0030126	Golgi membrane;structural molecule activity;intracellular protein transport;endoplasmic reticulum to Golgi vesicle-mediated transport;retrograde vesicle-mediated transport, Golgi to endoplasmic reticulum;intra-Golgi vesicle-mediated transport;COPI vesicle coat
Dis.W6-48549-006.v1.1AG00476.t1	-	77
Dis.W6-48549-006.v1.1AG00477.t1	-	148			noIPR	Nuclear protein DGCR14/ESS-2
Dis.W6-48549-006.v1.1AG00478.t1	CAD6247605.1unnamed protein product	118			noIPR;noIPR;noIPR	Thiolase-like;Thiolase-like;Thiolase-like
Dis.W6-48549-006.v1.1AG00479.t1	KAF0887955.1hypothetical protein E2562_006880	118
Dis.W6-48549-006.v1.1AG00480.t1	KAF8769726.1hypothetical protein HU200_006335	968	EC:2.7.11.1	non-specific serine/threonine protein kinase	noIPR;noIPR;noIPR;noIPR;IPR000719;IPR003591;IPR001611;IPR032675;IPR032675;noIPR;IPR032675;IPR000719;noIPR;IPR013210;IPR032675;noIPR;noIPR;noIPR;noIPR;noIPR;noIPR;noIPR;noIPR;noIPR;noIPR;noIPR;noIPR;noIPR;noIPR;noIPR;noIPR;noIPR;noIPR;noIPR;noIPR;noIPR;noIPR;noIPR;noIPR;noIPR;noIPR;noIPR;noIPR;noIPR;noIPR;noIPR;noIPR;noIPR;noIPR;noIPR;noIPR;noIPR;noIPR;noIPR;noIPR;noIPR;noIPR;noIPR;noIPR;noIPR;noI…	Protein-tyrosine phosphatase-like;Protein-tyrosine phosphatase-like;Protein-tyrosine phosphatase-like;Protein-tyrosine phosphatase-like;Protein kinase domain;Leucine-rich repeat, typical subtype;Leucine-rich repeat;Leucine-rich repeat domain superfamily;Leucine-rich repeat domain superfamily;Leucine-rich repeat domain superfamily;Leucine-rich repeat domain superfamily;Protein kinase domain;Protei…	GO:0004674;GO:0005524;GO:0016020;GO:0016310	protein serine/threonine kinase activity;ATP binding;membrane;phosphorylation
Dis.W6-48549-006.v1.1AG00481.t1	RLN07552.1peroxisomal fatty acid beta-oxidation multifunctional protein	471	EC:4.2.1.74;EC:1.1.1;EC:5;EC:4.2.1.17	medium-chain-enoyl-CoA hydratase;Acting on the CH-OH group of donors;Isomerases;enoyl-CoA hydratase	noIPR;noIPR;IPR006176;IPR006108;noIPR;noIPR;noIPR;IPR008927;IPR029045;IPR036291;IPR008927	Nonaspanin (TM9SF);Nonaspanin (TM9SF);3-hydroxyacyl-CoA dehydrogenase, NAD binding;3-hydroxyacyl-CoA dehydrogenase, C-terminal;3-hydroxyacyl-CoA dehydrogenase, C-terminal;3-hydroxyacyl-CoA dehydrogenase, C-terminal;3-hydroxyacyl-CoA dehydrogenase, C-terminal;6-phosphogluconate dehydrogenase-like, C-terminal domain superfamily;ClpP/crotonase-like domain superfamily;NAD(P)-binding domain superfamil…	GO:0003729;GO:0005737;GO:0006635;GO:0008017;GO:0016616;GO:0016853;GO:0018812;GO:0043229	mRNA binding;cytoplasm;fatty acid beta-oxidation;microtubule binding;oxidoreductase activity, acting on the CH-OH group of donors, NAD or NADP as acceptor;isomerase activity;3-hydroxyacyl-CoA dehydratase activity;intracellular organelle
Dis.W6-48549-006.v1.1AG00481.t2	XP_004952203.1peroxisomal fatty acid beta-oxidation multifunctional protein	427	EC:4.2.1.74;EC:1.1.1;EC:5;EC:4.2.1.17	medium-chain-enoyl-CoA hydratase;Acting on the CH-OH group of donors;Isomerases;enoyl-CoA hydratase	noIPR;noIPR;IPR006176;noIPR;IPR006108;noIPR;noIPR;noIPR;IPR008927;IPR036291;IPR008927;IPR029045	High mobility group box domain superfamily;High mobility group box domain superfamily;3-hydroxyacyl-CoA dehydrogenase, NAD binding;3-hydroxyacyl-CoA dehydrogenase, NAD binding;3-hydroxyacyl-CoA dehydrogenase, C-terminal;3-hydroxyacyl-CoA dehydrogenase, C-terminal;3-hydroxyacyl-CoA dehydrogenase, C-terminal;3-hydroxyacyl-CoA dehydrogenase, C-terminal;6-phosphogluconate dehydrogenase-like, C-termin…	GO:0003729;GO:0005737;GO:0006635;GO:0008017;GO:0016616;GO:0016853;GO:0018812;GO:0043229	mRNA binding;cytoplasm;fatty acid beta-oxidation;microtubule binding;oxidoreductase activity, acting on the CH-OH group of donors, NAD or NADP as acceptor;isomerase activity;3-hydroxyacyl-CoA dehydratase activity;intracellular organelle
Dis.W6-48549-006.v1.1AG00482.t1	-	75			noIPR;noIPR	TFIIS/LEDGF domain superfamily;TFIIS/LEDGF domain superfamily
Dis.W6-48549-006.v1.1AG00483.t1	KAJ1278488.1hypothetical protein BS78_04G083500	985			noIPR;noIPR;IPR002182;noIPR;IPR036388;IPR042197;IPR041118;IPR032675;IPR027417;IPR032675;IPR044974;IPR038005;noIPR;IPR027417	Domain of unknown function DUF4220;Domain of unknown function DUF4220;NB-ARC;NB-ARC;Winged helix-like DNA-binding domain superfamily;Apoptotic protease-activating factors, helical domain;Rx, N-terminal;Leucine-rich repeat domain superfamily;P-loop containing nucleoside triphosphate hydrolase;Leucine-rich repeat domain superfamily;Disease resistance protein, plants;Virus X resistance protein-like,…	GO:0050896	response to stimulus
Dis.W6-48549-006.v1.1AG00484.t1	XP_025802653.1uncharacterized protein LOC112881934 isoform X3	236			noIPR;noIPR	WEB family;WEB family
Dis.W6-48549-006.v1.1AG00485.t1	GJM90595.1hypothetical protein PR202_ga06894	517	EC:3.5.1.98	histone deacetylase	IPR003084;IPR000286;noIPR;IPR003084;IPR023801;IPR037138;noIPR;noIPR;noIPR;noIPR;noIPR;noIPR;noIPR;noIPR;noIPR;noIPR;IPR023696	Histone deacetylase;Histone deacetylase family;Histone deacetylase family;Histone deacetylase;Histone deacetylase domain;Histone deacetylase domain superfamily;Histone deacetylase domain superfamily;Histone deacetylase domain superfamily;Histone deacetylase domain superfamily;Histone deacetylase domain superfamily;Histone deacetylase domain superfamily;Histone deacetylase domain superfamily;Histo…	GO:0004407;GO:0005634;GO:0006338;GO:0006357;GO:0046872	histone deacetylase activity;nucleus;chromatin remodeling;regulation of transcription by RNA polymerase II;metal ion binding
Dis.W6-48549-006.v1.1AG00486.t1	GJN19331.1hypothetical protein PR202_gb06598	512	EC:2.7.11.1	non-specific serine/threonine protein kinase	noIPR;noIPR;IPR000719;IPR032675;noIPR;noIPR;IPR001245;noIPR;noIPR;noIPR;noIPR;noIPR;noIPR;noIPR;noIPR;noIPR;noIPR;noIPR;noIPR;noIPR;noIPR;noIPR;noIPR;noIPR;noIPR;noIPR;noIPR;noIPR;noIPR;noIPR;noIPR;noIPR;noIPR;noIPR;noIPR;noIPR;noIPR;noIPR;noIPR;noIPR;noIPR;noIPR;noIPR;noIPR;noIPR;noIPR;noIPR;noIPR;noIPR;noIPR;noIPR;noIPR;noIPR;noIPR;noIPR;noIPR;noIPR;noIPR;noIPR;noIPR;noIPR;noIPR;noIPR;noIPR;noI…	Tryptophan synthase beta chain-like, PALP domain superfamily;Tryptophan synthase beta chain-like, PALP domain superfamily;Protein kinase domain;Leucine-rich repeat domain superfamily;Leucine-rich repeat domain superfamily;Leucine-rich repeat domain superfamily;Serine-threonine/tyrosine-protein kinase, catalytic domain;Serine-threonine/tyrosine-protein kinase, catalytic domain;Serine-threonine/tyr…	GO:0004674;GO:0005524;GO:0016020;GO:0016310	protein serine/threonine kinase activity;ATP binding;membrane;phosphorylation
Dis.W6-48549-006.v1.1AG00487.t1	TVU14108.1hypothetical protein EJB05_37554, partial	145			IPR024752;noIPR	Myb/SANT-like domain;Myb/SANT-like domain	GO:0016020	membrane
Dis.W6-48549-006.v1.1AG00488.t1	TVU33056.1hypothetical protein EJB05_24837, partial	859	EC:2.7.1	Transferring phosphorus-containing groups	noIPR;noIPR;IPR001789;IPR029016;noIPR;IPR003018;noIPR;noIPR;noIPR;noIPR;IPR001789;noIPR;IPR011006	Tetratricopeptide-like helical domain superfamily;Tetratricopeptide-like helical domain superfamily;Signal transduction response regulator, receiver domain;GAF-like domain superfamily;GAF-like domain superfamily;GAF domain;GAF domain;GAF domain;GAF domain;GAF domain;Signal transduction response regulator, receiver domain;Signal transduction response regulator, receiver domain;CheY-like superfamily	GO:0000166;GO:0004672;GO:0005789;GO:0009873;GO:0038199;GO:0046872;GO:0051740	nucleotide binding;protein kinase activity;endoplasmic reticulum membrane;ethylene-activated signaling pathway;ethylene receptor activity;metal ion binding;ethylene binding
Dis.W6-48549-006.v1.1AG00489.t1	GJM90600.1hypothetical protein PR202_ga06900	294	EC:2.7.11.1	non-specific serine/threonine protein kinase	noIPR;noIPR;noIPR;IPR003591;noIPR;IPR032675;IPR001611;IPR032675;IPR013210;noIPR;noIPR;noIPR;IPR017441;noIPR;IPR011009	MFS transporter superfamily;MFS transporter superfamily;MFS transporter superfamily;Leucine-rich repeat, typical subtype;Leucine-rich repeat, typical subtype;Leucine-rich repeat domain superfamily;Leucine-rich repeat;Leucine-rich repeat domain superfamily;Leucine-rich repeat-containing N-terminal, plant-type;Leucine-rich repeat-containing N-terminal, plant-type;Leucine-rich repeat-containing N-te…	GO:0004674;GO:0005524;GO:0016020;GO:0016310	protein serine/threonine kinase activity;ATP binding;membrane;phosphorylation
Dis.W6-48549-006.v1.1AG00489.t2	GJM90600.1hypothetical protein PR202_ga06900	299	EC:2.7.11.1	non-specific serine/threonine protein kinase	noIPR;noIPR;noIPR;IPR003591;IPR001611;IPR013210;noIPR;IPR032675;noIPR;noIPR;noIPR;noIPR;IPR017441;IPR011009;noIPR	Glycoside hydrolase superfamily;Glycoside hydrolase superfamily;Glycoside hydrolase superfamily;Leucine-rich repeat, typical subtype;Leucine-rich repeat;Leucine-rich repeat-containing N-terminal, plant-type;Leucine-rich repeat-containing N-terminal, plant-type;Leucine-rich repeat domain superfamily;Leucine-rich repeat domain superfamily;Leucine-rich repeat domain superfamily;Leucine-rich repeat d…	GO:0004674;GO:0005524;GO:0016020;GO:0016310	protein serine/threonine kinase activity;ATP binding;membrane;phosphorylation
Dis.W6-48549-006.v1.1AG00490.t1	KAF8668457.1hypothetical protein HU200_052274	281	EC:2.7.11.1	non-specific serine/threonine protein kinase	noIPR;IPR000719;noIPR;noIPR;noIPR;noIPR;noIPR;noIPR;noIPR;noIPR;noIPR;noIPR;noIPR;noIPR;noIPR;noIPR;noIPR;noIPR;noIPR;noIPR;noIPR;noIPR;noIPR;noIPR;noIPR;noIPR;noIPR;noIPR;noIPR;noIPR;noIPR;noIPR;noIPR;noIPR;noIPR;noIPR;noIPR;noIPR;noIPR;noIPR;noIPR;noIPR;noIPR;noIPR;IPR008271;IPR000719;IPR011009	Ribonuclease H-like superfamily;Protein kinase domain;Protein kinase domain;Protein kinase domain;Protein kinase domain;Protein kinase domain;Protein kinase domain;Protein kinase domain;Protein kinase domain;Protein kinase domain;Protein kinase domain;Protein kinase domain;Protein kinase domain;Protein kinase domain;Protein kinase domain;Protein kinase domain;Protein kinase domain;Protein kinase …	GO:0004674;GO:0005524;GO:0016020;GO:0016310	protein serine/threonine kinase activity;ATP binding;membrane;phosphorylation
Dis.W6-48549-006.v1.1AG00491.t1	CAD6251404.1unnamed protein product	437	EC:2.7.1	Transferring phosphorus-containing groups	noIPR;noIPR;noIPR;IPR032319;IPR038239;IPR027417;IPR032324;IPR010655;IPR038238;IPR045116;IPR028606;IPR027417	P-loop containing nucleoside triphosphate hydrolase;P-loop containing nucleoside triphosphate hydrolase;P-loop containing nucleoside triphosphate hydrolase;Polyribonucleotide 5'-hydroxyl-kinase Clp1, P-loop domain;Clp1, N-terminal beta-sandwich domain superfamily;P-loop containing nucleoside triphosphate hydrolase;Clp1, N-terminal beta-sandwich domain;Pre-mRNA cleavage complex subunit Clp1, C-ter…	GO:0005524;GO:0005849;GO:0006378;GO:0006388;GO:0051731	ATP binding;mRNA cleavage factor complex;mRNA polyadenylation;tRNA splicing, via endonucleolytic cleavage and ligation;polynucleotide 5'-hydroxyl-kinase activity
Dis.W6-48549-006.v1.1AG00492.t1	KAG8070316.1hypothetical protein GUJ93_ZPchr0006g46103	306	EC:3.1.3.16	protein-serine/threonine phosphatase	IPR006186;noIPR;IPR006186;IPR029052;IPR004843;IPR047129;IPR006186;noIPR;IPR029052	Serine/threonine-specific protein phosphatase/bis(5-nucleosyl)-tetraphosphatase;Serine/threonine-specific protein phosphatase/bis(5-nucleosyl)-tetraphosphatase;Serine/threonine-specific protein phosphatase/bis(5-nucleosyl)-tetraphosphatase;Metallo-dependent phosphatase-like;Calcineurin-like phosphoesterase domain, ApaH type;Serine/Threonine protein phosphatase PP2A-like;Serine/threonine-specific …	GO:0000278;GO:0005634;GO:0005829;GO:0017018;GO:0046872	mitotic cell cycle;nucleus;cytosol;myosin phosphatase activity;metal ion binding
Dis.W6-48549-006.v1.1AG00493.t1	-	115			noIPR	Reticulon
Dis.W6-48549-006.v1.1AG00494.t1	TVU33089.1hypothetical protein EJB05_24874, partial	437	EC:2.1.1	Transferring one-carbon groups	IPR023267;noIPR;noIPR;IPR001678;noIPR;IPR029063;noIPR;IPR023267;IPR001678;noIPR;IPR029063	RNA (C5-cytosine) methyltransferase;RNA (C5-cytosine) methyltransferase;RNA (C5-cytosine) methyltransferase;SAM-dependent methyltransferase RsmB/NOP2-type;SAM-dependent methyltransferase RsmB/NOP2-type;S-adenosyl-L-methionine-dependent methyltransferase superfamily;S-adenosyl-L-methionine-dependent methyltransferase superfamily;RNA (C5-cytosine) methyltransferase;SAM-dependent methyltransferase R…	GO:0003729;GO:0005730;GO:0008757;GO:0070475	mRNA binding;nucleolus;S-adenosylmethionine-dependent methyltransferase activity;rRNA base methylation
Dis.W6-48549-006.v1.1AG00495.t1	KAF8691527.1hypothetical protein HU200_040674	101			IPR002068;IPR008978;noIPR;IPR031107;IPR002068;noIPR;IPR008978	Alpha crystallin/Hsp20 domain;HSP20-like chaperone;HSP20-like chaperone;Small heat shock protein;Alpha crystallin/Hsp20 domain;Alpha crystallin/Hsp20 domain;HSP20-like chaperone	GO:0006457;GO:0009408;GO:0009651;GO:0042542;GO:0043621;GO:0051082;GO:0051259	protein folding;response to heat;response to salt stress;response to hydrogen peroxide;protein self-association;unfolded protein binding;protein complex oligomerization
Dis.W6-48549-006.v1.1AG00496.t1	TVU33087.1hypothetical protein EJB05_24872	880	EC:3.4.11	Acting on peptide bonds (peptidases)	IPR001930;noIPR;noIPR;noIPR;noIPR;IPR014782;noIPR;IPR042097;noIPR;IPR024571;IPR045357;IPR027268;noIPR;noIPR;noIPR;noIPR;noIPR;noIPR;noIPR;noIPR;noIPR;IPR034016;IPR042097;noIPR	Peptidase M1, alanine aminopeptidase/leukotriene A4 hydrolase;Peptidase M1, alanine aminopeptidase/leukotriene A4 hydrolase;Peptidase M1, alanine aminopeptidase/leukotriene A4 hydrolase;Peptidase M1, alanine aminopeptidase/leukotriene A4 hydrolase;Peptidase M1, alanine aminopeptidase/leukotriene A4 hydrolase;Peptidase M1, membrane alanine aminopeptidase;Peptidase M1, membrane alanine aminopeptida…	GO:0005737;GO:0006508;GO:0008270;GO:0016020;GO:0042277;GO:0043171;GO:0043231;GO:0070006	cytoplasm;proteolysis;zinc ion binding;membrane;peptide binding;peptide catabolic process;intracellular membrane-bounded organelle;metalloaminopeptidase activity
Dis.W6-48549-006.v1.1AG00497.t1	GJM90612.1hypothetical protein PR202_ga06912	433	EC:2.7.1	Transferring phosphorus-containing groups	noIPR;noIPR;IPR000719;noIPR;IPR001245;noIPR;noIPR;noIPR;noIPR;noIPR;noIPR;noIPR;noIPR;noIPR;noIPR;noIPR;noIPR;noIPR;noIPR;noIPR;noIPR;noIPR;noIPR;noIPR;noIPR;noIPR;noIPR;noIPR;noIPR;noIPR;noIPR;noIPR;noIPR;noIPR;noIPR;noIPR;noIPR;noIPR;noIPR;noIPR;noIPR;noIPR;noIPR;noIPR;noIPR;noIPR;noIPR;noIPR;noIPR;noIPR;IPR008271;IPR000719;IPR011009	MOB kinase activator superfamily;MOB kinase activator superfamily;Protein kinase domain;Protein kinase domain;Serine-threonine/tyrosine-protein kinase, catalytic domain;Serine-threonine/tyrosine-protein kinase, catalytic domain;Serine-threonine/tyrosine-protein kinase, catalytic domain;Serine-threonine/tyrosine-protein kinase, catalytic domain;Serine-threonine/tyrosine-protein kinase, catalytic d…	GO:0004672;GO:0005524	protein kinase activity;ATP binding
Dis.W6-48549-006.v1.1AG00498.t1	GJN19348.1hypothetical protein PR202_gb06615	210	EC:2.7.1	Transferring phosphorus-containing groups	noIPR;noIPR;noIPR;noIPR;noIPR	F-box-like domain superfamily;F-box-like domain superfamily;F-box-like domain superfamily;F-box-like domain superfamily;F-box-like domain superfamily	GO:0004672;GO:0005524	protein kinase activity;ATP binding
Dis.W6-48549-006.v1.1AG00499.t1	-	160			noIPR;noIPR;noIPR	Endoplasmic reticulum vesicle transporter;Endoplasmic reticulum vesicle transporter;Endoplasmic reticulum vesicle transporter
Dis.W6-48549-006.v1.1AG00500.t1	TVU33092.1hypothetical protein EJB05_24877, partial	186
Dis.W6-48549-006.v1.1AG00501.t1	GJM90626.1hypothetical protein PR202_ga06926	166			IPR018499;IPR044991	Tetraspanin/Peripherin;Tetraspani, plant	GO:0005886;GO:0009506;GO:0009734	plasma membrane;plasmodesma;auxin-activated signaling pathway
Dis.W6-48549-006.v1.1AG00502.t1	TVU33101.1hypothetical protein EJB05_24886	102			IPR044991	Tetraspani, plant	GO:0005886;GO:0009506;GO:0009734	plasma membrane;plasmodesma;auxin-activated signaling pathway
Dis.W6-48549-006.v1.1AG00503.t1	GJM90627.1hypothetical protein PR202_ga06927	98			IPR006702	Casparian strip membrane protein domain	GO:0005886	plasma membrane
Dis.W6-48549-006.v1.1AG00504.t1	TVT99559.1hypothetical protein EJB05_55075, partial	328
Dis.W6-48549-006.v1.1AG00505.t1	TVU33102.1hypothetical protein EJB05_24887, partial	542	EC:1.5.99.12	cytokinin dehydrogenase	IPR016170;IPR015345;IPR006094;IPR016169;IPR016167;noIPR;IPR006093;IPR016166;IPR036318;IPR016164	Cytokinin dehydrogenase, C-terminal domain superfamily;Cytokinin dehydrogenase 1, FAD/cytokinin binding domain;FAD linked oxidase, N-terminal;FAD-binding, type PCMH, subdomain 2;FAD-binding, type PCMH, subdomain 1;FAD-binding, type PCMH, subdomain 1;Oxygen oxidoreductase covalent FAD-binding site;FAD-binding domain, PCMH-type;FAD-binding, type PCMH-like superfamily;FAD-linked oxidase-like, C-term…	GO:0005615;GO:0009690;GO:0019139;GO:0071949	extracellular space;cytokinin metabolic process;cytokinin dehydrogenase activity;FAD binding
Dis.W6-48549-006.v1.1AG00506.t1	TVU33105.1hypothetical protein EJB05_24890	283			noIPR;IPR000679;IPR013088;IPR000679;noIPR;noIPR;noIPR;IPR000679;IPR000679;IPR000679;noIPR	Mitochondrial carrier domain superfamily;Zinc finger, GATA-type;Zinc finger, NHR/GATA-type;Zinc finger, GATA-type;Zinc finger, GATA-type;Zinc finger, GATA-type;Zinc finger, GATA-type;Zinc finger, GATA-type;Zinc finger, GATA-type;Zinc finger, GATA-type;Zinc finger, GATA-type	GO:0006355;GO:0008270;GO:0042221;GO:0043565	regulation of DNA-templated transcription;zinc ion binding;response to chemical;sequence-specific DNA binding
Dis.W6-48549-006.v1.1AG00507.t1	XP_025793283.1elongation factor 1-gamma 2	496	EC:2.5.1.18	glutathione transferase	noIPR;noIPR;noIPR;IPR001662;IPR004046;IPR001662;noIPR;noIPR;IPR004045;IPR036433;noIPR;IPR040079;noIPR;noIPR;IPR044628;IPR001662;IPR010987;IPR004045;noIPR;noIPR;IPR036282;IPR036433;IPR036249	DNA-binding domain superfamily;DNA-binding domain superfamily;DNA-binding domain superfamily;Elongation factor 1B gamma, C-terminal;Glutathione S-transferase, C-terminal;Elongation factor 1B gamma, C-terminal;Elongation factor 1B gamma, C-terminal;Elongation factor 1B gamma, C-terminal;Glutathione S-transferase, N-terminal;Elongation factor EF1B gamma, C-terminal domain superfamily;Elongation fac…	GO:0003746;GO:0004364;GO:0006414;GO:0042221	translation elongation factor activity;glutathione transferase activity;translational elongation;response to chemical
Dis.W6-48549-006.v1.1AG00508.t1	GJM90630.1hypothetical protein PR202_ga06930	118			IPR008011;noIPR;IPR045297	Complex 1 LYR protein domain;Complex 1 LYR protein domain;LYRM4, LYR domain	GO:0016226	iron-sulfur cluster assembly
Dis.W6-48549-006.v1.1AG00509.t1	TVU33108.1hypothetical protein EJB05_24893, partial	845	EC:2.7.11.1	non-specific serine/threonine protein kinase	IPR001245;noIPR;noIPR;IPR000719;noIPR;IPR001245;noIPR;noIPR;noIPR;noIPR;noIPR;noIPR;noIPR;noIPR;noIPR;noIPR;noIPR;noIPR;noIPR;noIPR;noIPR;noIPR;noIPR;noIPR;noIPR;noIPR;noIPR;noIPR;noIPR;noIPR;noIPR;noIPR;noIPR;noIPR;noIPR;noIPR;noIPR;noIPR;noIPR;noIPR;noIPR;noIPR;noIPR;noIPR;noIPR;noIPR;noIPR;noIPR;noIPR;noIPR;noIPR;noIPR;noIPR;noIPR;noIPR;noIPR;noIPR;noIPR;noIPR;noIPR;noIPR;noIPR;noIPR;noIPR;noI…	Serine-threonine/tyrosine-protein kinase, catalytic domain;Serine-threonine/tyrosine-protein kinase, catalytic domain;Serine-threonine/tyrosine-protein kinase, catalytic domain;Protein kinase domain;Protein kinase domain;Serine-threonine/tyrosine-protein kinase, catalytic domain;Serine-threonine/tyrosine-protein kinase, catalytic domain;Serine-threonine/tyrosine-protein kinase, catalytic domain;S…	GO:0004674;GO:0005524;GO:0005737;GO:0007165;GO:0016310	protein serine/threonine kinase activity;ATP binding;cytoplasm;signal transduction;phosphorylation
Dis.W6-48549-006.v1.1AG00510.t1	TVU33111.1hypothetical protein EJB05_24896, partial	577			noIPR;IPR011598;IPR011598;IPR036638;noIPR;noIPR;noIPR;noIPR;noIPR;noIPR;noIPR;IPR044658;IPR011598;IPR036638	S-adenosyl-L-methionine-dependent methyltransferase superfamily;Myc-type, basic helix-loop-helix (bHLH) domain;Myc-type, basic helix-loop-helix (bHLH) domain;Helix-loop-helix DNA-binding domain superfamily;Helix-loop-helix DNA-binding domain superfamily;Helix-loop-helix DNA-binding domain superfamily;Helix-loop-helix DNA-binding domain superfamily;Helix-loop-helix DNA-binding domain superfamily;H…	GO:0046983	protein dimerization activity
Dis.W6-48549-006.v1.1AG00511.t1	TVT98823.1hypothetical protein EJB05_55838	79					GO:0034998	oligosaccharyltransferase I complex
Dis.W6-48549-006.v1.1AG00512.t1	-	92
Dis.W6-48549-006.v1.1AG00513.t1	TVU33120.1hypothetical protein EJB05_24905	471	EC:7.1.2.2;EC:6	H(+)-transporting two-sector ATPase;Ligases	noIPR;noIPR;noIPR;IPR000504;IPR000504;IPR012677;IPR012677;noIPR;noIPR;noIPR;noIPR;noIPR;IPR000504;IPR000504;noIPR;IPR035979;IPR035979	Rho GTPase activation protein;Rho GTPase activation protein;Rho GTPase activation protein;RNA recognition motif domain;RNA recognition motif domain;Nucleotide-binding alpha-beta plait domain superfamily;Nucleotide-binding alpha-beta plait domain superfamily;Nucleotide-binding alpha-beta plait domain superfamily;Nucleotide-binding alpha-beta plait domain superfamily;Nucleotide-binding alpha-beta p…	GO:0003723;GO:0005198;GO:0005654;GO:0006886;GO:0010468;GO:0015986;GO:0016192;GO:0030117;GO:0045261;GO:0046933;GO:1902600;GO:1990904	RNA binding;structural molecule activity;nucleoplasm;intracellular protein transport;regulation of gene expression;proton motive force-driven ATP synthesis;vesicle-mediated transport;membrane coat;proton-transporting ATP synthase complex, catalytic core F(1);proton-transporting ATP synthase activity, rotational mechanism;proton transmembrane transport;ribonucleoprotein complex
Dis.W6-48549-006.v1.1AG00514.t1	XP_047076706.1reticulocalbin-2	372			noIPR;IPR002048;noIPR;noIPR;noIPR;IPR018247;IPR018247;IPR018247;IPR002048;IPR002048;IPR002048;IPR011992;IPR011992	Knottin, scorpion toxin-like superfamily;EF-hand domain;EF-hand domain;EF-hand domain;EF-hand domain;EF-Hand 1, calcium-binding site;EF-Hand 1, calcium-binding site;EF-Hand 1, calcium-binding site;EF-hand domain;EF-hand domain;EF-hand domain;EF-hand domain pair;EF-hand domain pair	GO:0005509;GO:0005783;GO:0016020	calcium ion binding;endoplasmic reticulum;membrane
Dis.W6-48549-006.v1.1AG00515.t1	OEL32318.1Cytochrome P450 711A1	545	EC:1.14	Acting on paired donors, with incorporation or reduction of molecular oxygen. The oxygen incorporated need not be derived from O2	IPR001128;IPR002401;IPR001128;IPR036396;noIPR;noIPR;noIPR;IPR017972;IPR036396	Cytochrome P450;Cytochrome P450, E-class, group I;Cytochrome P450;Cytochrome P450 superfamily;Cytochrome P450 superfamily;Cytochrome P450 superfamily;Cytochrome P450 superfamily;Cytochrome P450, conserved site;Cytochrome P450 superfamily	GO:0004497;GO:0005506;GO:0009926;GO:0009934;GO:0009963;GO:0010223;GO:0016020;GO:0016705;GO:0020037	monooxygenase activity;iron ion binding;auxin polar transport;regulation of meristem structural organization;positive regulation of flavonoid biosynthetic process;secondary shoot formation;membrane;oxidoreductase activity, acting on paired donors, with incorporation or reduction of molecular oxygen;heme binding
Dis.W6-48549-006.v1.1AG00516.t1	KAG2657149.1hypothetical protein PVAP13_1KG190800	341	EC:2.5.1.47	cysteine synthase	noIPR;noIPR;IPR036052;IPR036052;IPR005856;IPR001926;IPR005859;noIPR;noIPR;noIPR;noIPR;noIPR;noIPR;IPR036052	Reverse transcriptase, RNA-dependent DNA polymerase;Reverse transcriptase, RNA-dependent DNA polymerase;Tryptophan synthase beta chain-like, PALP domain superfamily;Tryptophan synthase beta chain-like, PALP domain superfamily;Cysteine synthase;Tryptophan synthase beta chain-like, PALP domain;Cysteine synthase CysK;Cysteine synthase CysK;Cysteine synthase CysK;Cysteine synthase CysK;Cysteine synth…	GO:0004124;GO:0005737;GO:0006535	cysteine synthase activity;cytoplasm;cysteine biosynthetic process from serine
Dis.W6-48549-006.v1.1AG00517.t1	GJM90639.1hypothetical protein PR202_ga06940	604	EC:2.7.11.1	non-specific serine/threonine protein kinase	noIPR;noIPR;noIPR;IPR000719;noIPR;noIPR;IPR001611;IPR000719;IPR032675;noIPR;noIPR;noIPR;noIPR;noIPR;noIPR;noIPR;noIPR;noIPR;noIPR;noIPR;noIPR;noIPR;noIPR;noIPR;noIPR;noIPR;noIPR;noIPR;noIPR;noIPR;noIPR;noIPR;noIPR;noIPR;noIPR;noIPR;noIPR;noIPR;noIPR;noIPR;noIPR;noIPR;noIPR;noIPR;noIPR;noIPR;noIPR;noIPR;noIPR;noIPR;noIPR;noIPR;noIPR;noIPR;noIPR;noIPR;noIPR;noIPR;noIPR;noIPR;noIPR;noIPR;noIPR;noIPR…	EF-hand domain pair;EF-hand domain pair;EF-hand domain pair;Protein kinase domain;Protein kinase domain;Protein kinase domain;Leucine-rich repeat;Protein kinase domain;Leucine-rich repeat domain superfamily;Leucine-rich repeat domain superfamily;Leucine-rich repeat domain superfamily;Leucine-rich repeat domain superfamily;Leucine-rich repeat domain superfamily;Leucine-rich repeat domain superfami…	GO:0004674;GO:0005524;GO:0016020;GO:0016310	protein serine/threonine kinase activity;ATP binding;membrane;phosphorylation
Dis.W6-48549-006.v1.1AG00518.t1	OEL30146.1hypothetical protein BAE44_0008835	198			IPR021899;noIPR;noIPR;noIPR	Protein of unknown function DUF3511;Protein of unknown function DUF3511;Protein of unknown function DUF3511;Protein of unknown function DUF3511
Dis.W6-48549-006.v1.1AG00519.t1	GJN37433.1hypothetical protein PR202_gb26387	103	EC:3	Hydrolases	IPR029058;IPR013094;noIPR;IPR029058	Alpha/Beta hydrolase fold;Alpha/beta hydrolase fold-3;Alpha/beta hydrolase fold-3;Alpha/Beta hydrolase fold	GO:0016787	hydrolase activity
Dis.W6-48549-006.v1.1AG00520.t1	-	101			noIPR	P-loop containing nucleoside triphosphate hydrolase
Dis.W6-48549-006.v1.1AG00521.t1	-	76			noIPR;noIPR	Zinc finger, CCHC-type superfamily;Zinc finger, CCHC-type superfamily
Dis.W6-48549-006.v1.1AG00522.t1	KAJ1278608.1hypothetical protein BS78_04G091700	348	EC:3.1.3.16	protein-serine/threonine phosphatase	noIPR;IPR001932;IPR036457;IPR001932;IPR015655;IPR001932;IPR001932;IPR036457	Receptor-like protein kinase FERONIA-like;PPM-type phosphatase-like domain;PPM-type phosphatase-like domain superfamily;PPM-type phosphatase-like domain;Protein phosphatase 2C family;PPM-type phosphatase-like domain;PPM-type phosphatase-like domain;PPM-type phosphatase-like domain superfamily	GO:0017018	myosin phosphatase activity
Dis.W6-48549-006.v1.1AG00523.t1	-	160			noIPR	RmlC-like cupin domain superfamily
Dis.W6-48549-006.v1.1AG00524.t1	TVU33130.1hypothetical protein EJB05_24915	693			noIPR;IPR004087;IPR004088;IPR036612;noIPR;noIPR;noIPR;noIPR;noIPR;noIPR;noIPR;noIPR;noIPR;noIPR;noIPR;noIPR;noIPR;IPR036612;IPR036612	CAP superfamily;K Homology domain;K Homology domain, type 1;K Homology domain, type 1 superfamily;K Homology domain, type 1 superfamily;K Homology domain, type 1 superfamily;K Homology domain, type 1 superfamily;K Homology domain, type 1 superfamily;K Homology domain, type 1 superfamily;K Homology domain, type 1 superfamily;K Homology domain, type 1 superfamily;K Homology domain, type 1 superfami…	GO:0003729;GO:0005737;GO:0010468	mRNA binding;cytoplasm;regulation of gene expression
Dis.W6-48549-006.v1.1AG00525.t1	-	67
Dis.W6-48549-006.v1.1AG00526.t1	CAD6251365.1unnamed protein product	501	EC:3.4.11	Acting on peptide bonds (peptidases)	noIPR;IPR007865;IPR029149;IPR036005;IPR007865;IPR000994;noIPR;noIPR;IPR029149;IPR036005	Protein of unknown function DUF3511;Aminopeptidase P, N-terminal;Creatinase/Aminopeptidase P/Spt16, N-terminal;Creatinase/aminopeptidase-like;Aminopeptidase P, N-terminal;Peptidase M24;Peptidase M24;Peptidase M24;Creatinase/Aminopeptidase P/Spt16, N-terminal;Creatinase/aminopeptidase-like	GO:0006508;GO:0030145;GO:0070006	proteolysis;manganese ion binding;metalloaminopeptidase activity
Dis.W6-48549-006.v1.1AG00527.t1	GJN35246.1hypothetical protein PR202_gb23996	648	EC:3.6.1.15	nucleoside-triphosphate phosphatase	noIPR;noIPR;noIPR;noIPR;noIPR;noIPR;noIPR;noIPR;noIPR;noIPR;noIPR;IPR013126;IPR029047;noIPR;noIPR;IPR029048;noIPR;noIPR;noIPR;IPR013126;IPR018181;IPR018181;IPR018181;noIPR;IPR043129;IPR043129;IPR029047;IPR029048	FAD/NAD(P)-binding domain superfamily;FAD/NAD(P)-binding domain superfamily;FAD/NAD(P)-binding domain superfamily;FAD/NAD(P)-binding domain superfamily;FAD/NAD(P)-binding domain superfamily;FAD/NAD(P)-binding domain superfamily;FAD/NAD(P)-binding domain superfamily;FAD/NAD(P)-binding domain superfamily;FAD/NAD(P)-binding domain superfamily;FAD/NAD(P)-binding domain superfamily;FAD/NAD(P)-binding …	GO:0005524;GO:0005737;GO:0006950;GO:0016887;GO:0031072;GO:0042026;GO:0051085;GO:0140662	ATP binding;cytoplasm;response to stress;ATP hydrolysis activity;heat shock protein binding;protein refolding;chaperone cofactor-dependent protein refolding;ATP-dependent protein folding chaperone
Dis.W6-48549-006.v1.1AG00528.t1	TVU33139.1hypothetical protein EJB05_24925, partial	339			IPR002067;noIPR;IPR018108;IPR023395;noIPR;IPR018108;IPR018108;IPR018108;IPR023395	Mitochondrial carrier protein;Mitochondrial carrier protein;Mitochondrial substrate/solute carrier;Mitochondrial carrier domain superfamily;Mitochondrial carrier domain superfamily;Mitochondrial substrate/solute carrier;Mitochondrial substrate/solute carrier;Mitochondrial substrate/solute carrier;Mitochondrial carrier domain superfamily	GO:0005743;GO:0015228;GO:1990559	mitochondrial inner membrane;coenzyme A transmembrane transporter activity;mitochondrial coenzyme A transmembrane transport
Dis.W6-48549-006.v1.1AG00529.t1	CAD6251401.1unnamed protein product	66			IPR002068;IPR008978;IPR031107;IPR002068;IPR008978	Alpha crystallin/Hsp20 domain;HSP20-like chaperone;Small heat shock protein;Alpha crystallin/Hsp20 domain;HSP20-like chaperone	GO:0006457;GO:0009408;GO:0009651;GO:0042542;GO:0043621;GO:0051082;GO:0051259	protein folding;response to heat;response to salt stress;response to hydrogen peroxide;protein self-association;unfolded protein binding;protein complex oligomerization
Dis.W6-48549-006.v1.1AG00530.t1	CAD6251326.1unnamed protein product	186			noIPR;IPR036638;IPR011598;noIPR;noIPR;IPR036638	Transmembrane protein DDB_G0292058-like;Helix-loop-helix DNA-binding domain superfamily;Myc-type, basic helix-loop-helix (bHLH) domain;Myc-type, basic helix-loop-helix (bHLH) domain;Myc-type, basic helix-loop-helix (bHLH) domain;Helix-loop-helix DNA-binding domain superfamily	GO:0000977;GO:0000981;GO:0006357;GO:0046983;GO:0090575	RNA polymerase II transcription regulatory region sequence-specific DNA binding;DNA-binding transcription factor activity, RNA polymerase II-specific;regulation of transcription by RNA polymerase II;protein dimerization activity;RNA polymerase II transcription regulator complex
Dis.W6-48549-006.v1.1AG00531.t1	TVU45418.1hypothetical protein EJB05_04905	119	EC:2.7	Transferring phosphorus-containing groups	noIPR	Retrotransposon gag domain	GO:0016301;GO:0016310;GO:0046854;GO:0048015	kinase activity;phosphorylation;phosphatidylinositol phosphate biosynthetic process;phosphatidylinositol-mediated signaling
Dis.W6-48549-006.v1.1AG00532.t1	GJN19243.1hypothetical protein PR202_gb06492	114
Dis.W6-48549-006.v1.1AG00533.t1	XP_023156358.1uncharacterized protein LOC111589729 isoform X1	236			noIPR;noIPR	Pentatricopeptide repeat;Pentatricopeptide repeat
Dis.W6-48549-006.v1.1AG00534.t1	OEL14918.1Dehydration-responsive element-binding protein 3	178			noIPR;IPR001471;IPR001471;IPR036955;noIPR;IPR001471;IPR001471;IPR016177	DNA/RNA polymerase superfamily;AP2/ERF domain;AP2/ERF domain;AP2/ERF domain superfamily;AP2/ERF domain superfamily;AP2/ERF domain;AP2/ERF domain;DNA-binding domain superfamily	GO:0003677;GO:0003700;GO:0005634;GO:0006355	DNA binding;DNA-binding transcription factor activity;nucleus;regulation of DNA-templated transcription
Dis.W6-48549-006.v1.1AG00535.t1	OEL13210.1hypothetical protein BAE44_0025769	138			IPR008972;noIPR;noIPR;noIPR;noIPR;noIPR;noIPR;IPR008972	Cupredoxin;Cupredoxin;Cupredoxin;Cupredoxin;Cupredoxin;Cupredoxin;Cupredoxin;Cupredoxin	GO:0009055;GO:0016020;GO:0022900	electron transfer activity;membrane;electron transport chain
Dis.W6-48549-006.v1.1AG00536.t1	XP_004951389.1protein phosphatase 1 regulatory subunit pprA	343			noIPR;noIPR;noIPR;IPR003591;noIPR;IPR032675;IPR032675;IPR025875;noIPR;noIPR;IPR001611;IPR001611;IPR001611;IPR001611;IPR001611;IPR001611;noIPR	SKP1/BTB/POZ domain superfamily;SKP1/BTB/POZ domain superfamily;SKP1/BTB/POZ domain superfamily;Leucine-rich repeat, typical subtype;Leucine-rich repeat, typical subtype;Leucine-rich repeat domain superfamily;Leucine-rich repeat domain superfamily;Leucine rich repeat 4;Leucine rich repeat 4;Leucine rich repeat 4;Leucine-rich repeat;Leucine-rich repeat;Leucine-rich repeat;Leucine-rich repeat;Leuci…	GO:0005634;GO:0005737;GO:0009738;GO:0034504	nucleus;cytoplasm;abscisic acid-activated signaling pathway;protein localization to nucleus
Dis.W6-48549-006.v1.1AG00537.t1	XP_025824015.1uncharacterized protein LOC112899484 isoform X4	86
Dis.W6-48549-006.v1.1AG00538.t1	TVU33161.1hypothetical protein EJB05_24947, partial	250
Dis.W6-48549-006.v1.1AG00539.t1	GJN19396.1hypothetical protein PR202_gb06672	276			IPR008480;noIPR	Protein of unknown function DUF761, plant;Protein of unknown function DUF761, plant
Dis.W6-48549-006.v1.1AG00540.t1	OEL13216.1hypothetical protein BAE44_0025764	66					GO:0016020	membrane
Dis.W6-48549-006.v1.1AG00541.t1	KAF8652024.1hypothetical protein HU200_062966	138			noIPR;noIPR;IPR001976;noIPR;noIPR;noIPR;IPR001976;IPR018098;IPR001976;IPR012678	DNA polymerase epsilon, subunit B;DNA polymerase epsilon, subunit B;Ribosomal protein S24e;Ribosomal protein S24e;Ribosomal protein S24e;Ribosomal protein S24e;Ribosomal protein S24e;Ribosomal S24e conserved site;Ribosomal protein S24e;Ribosomal protein L23/L15e core domain superfamily	GO:0003735;GO:0005840;GO:0006412;GO:1990904	structural constituent of ribosome;ribosome;translation;ribonucleoprotein complex
Dis.W6-48549-006.v1.1AG00542.t1	TVU33169.1hypothetical protein EJB05_24955	207			noIPR;IPR033389;noIPR;noIPR;IPR003311;IPR000270;noIPR	FAD-binding, type PCMH-like superfamily;AUX/IAA domain;AUX/IAA domain;AUX/IAA domain;AUX/IAA protein;PB1 domain;PB1 domain	GO:0005634;GO:0006355;GO:0009734	nucleus;regulation of DNA-templated transcription;auxin-activated signaling pathway
Dis.W6-48549-006.v1.1AG00543.t1	-	252
Dis.W6-48549-006.v1.1AG00544.t1	TVU33168.1hypothetical protein EJB05_24954	1083	EC:2.7.1	Transferring phosphorus-containing groups	noIPR;noIPR;noIPR;noIPR;noIPR;noIPR;IPR003591;IPR000719;IPR032675;IPR013210;IPR001611;noIPR;noIPR;IPR032675;IPR000719;IPR032675;noIPR;noIPR;noIPR;noIPR;noIPR;noIPR;noIPR;noIPR;noIPR;noIPR;noIPR;noIPR;noIPR;noIPR;noIPR;noIPR;noIPR;noIPR;noIPR;noIPR;noIPR;noIPR;noIPR;noIPR;noIPR;noIPR;noIPR;noIPR;noIPR;noIPR;noIPR;noIPR;noIPR;noIPR;noIPR;noIPR;noIPR;noIPR;noIPR;noIPR;noIPR;noIPR;noIPR;noIPR;noIPR;n…	Chromophore lyase CpcT/CpeT;Chromophore lyase CpcT/CpeT;Chromophore lyase CpcT/CpeT;Chromophore lyase CpcT/CpeT;Chromophore lyase CpcT/CpeT;Chromophore lyase CpcT/CpeT;Leucine-rich repeat, typical subtype;Protein kinase domain;Leucine-rich repeat domain superfamily;Leucine-rich repeat-containing N-terminal, plant-type;Leucine-rich repeat;Leucine-rich repeat;Leucine-rich repeat;Leucine-rich repeat…	GO:0004672;GO:0005524;GO:0005886;GO:0016310	protein kinase activity;ATP binding;plasma membrane;phosphorylation
Dis.W6-48549-006.v1.1AG00545.t1	-	92
Dis.W6-48549-006.v1.1AG00546.t1	-	140			noIPR	Sanguinarine reductase SARED1-like
Dis.W6-48549-006.v1.1AG00547.t1	TVU33180.1hypothetical protein EJB05_24966	668	EC:4.2.1.46	dTDP-glucose 4,6-dehydratase	noIPR;noIPR;IPR016040;noIPR;noIPR;IPR001509;noIPR;noIPR;noIPR;IPR005888;IPR036291;IPR036291	Ribosomal protein L10-like domain superfamily;Ribosomal protein L10-like domain superfamily;NAD(P)-binding domain;NAD(P)-binding domain;NAD(P)-binding domain;NAD-dependent epimerase/dehydratase;NAD-dependent epimerase/dehydratase;NAD-dependent epimerase/dehydratase;NAD-dependent epimerase/dehydratase;dTDP-glucose 4,6-dehydratase;NAD(P)-binding domain superfamily;NAD(P)-binding domain superfamily	GO:0008460;GO:0009225	dTDP-glucose 4,6-dehydratase activity;nucleotide-sugar metabolic process
Dis.W6-48549-006.v1.1AG00548.t1	TVU33184.1hypothetical protein EJB05_24970	254			noIPR;IPR000232;noIPR;IPR000232;IPR000232;IPR036388;IPR027725;IPR000232;IPR036390	Phosphoesterase;Heat shock factor (HSF)-type, DNA-binding;Heat shock factor (HSF)-type, DNA-binding;Heat shock factor (HSF)-type, DNA-binding;Heat shock factor (HSF)-type, DNA-binding;Winged helix-like DNA-binding domain superfamily;Heat shock transcription factor family;Heat shock factor (HSF)-type, DNA-binding;Winged helix DNA-binding domain superfamily	GO:0000978;GO:0003700;GO:0005634;GO:0006357;GO:0034605	RNA polymerase II cis-regulatory region sequence-specific DNA binding;DNA-binding transcription factor activity;nucleus;regulation of transcription by RNA polymerase II;cellular response to heat
Dis.W6-48549-006.v1.1AG00549.t1	GJM90677.1hypothetical protein PR202_ga06979	183			IPR008914;IPR036610;IPR035810;IPR001858;IPR035810;IPR036610	Phosphatidylethanolamine-binding protein;PEBP-like superfamily;Phosphatidylethanolamine-binding protein, eukaryotic;Phosphatidylethanolamine-binding, conserved site;Phosphatidylethanolamine-binding protein, eukaryotic;PEBP-like superfamily
Dis.W6-48549-006.v1.1AG00549.t2	GJN19406.1hypothetical protein PR202_gb06684	97			IPR036610;IPR035810;IPR036610	PEBP-like superfamily;Phosphatidylethanolamine-binding protein, eukaryotic;PEBP-like superfamily
Dis.W6-48549-006.v1.1AG00550.t1	TVU33186.1hypothetical protein EJB05_24973	786			noIPR;noIPR;noIPR;IPR013170;noIPR;noIPR;noIPR;noIPR;noIPR;noIPR;noIPR;noIPR;noIPR	CBS domain superfamily;CBS domain superfamily;CBS domain superfamily;mRNA splicing factor Cwf21 domain;mRNA splicing factor Cwf21 domain;mRNA splicing factor Cwf21 domain;mRNA splicing factor Cwf21 domain;mRNA splicing factor Cwf21 domain;mRNA splicing factor Cwf21 domain;mRNA splicing factor Cwf21 domain;mRNA splicing factor Cwf21 domain;mRNA splicing factor Cwf21 domain;mRNA splicing factor Cwf…	GO:0005634	nucleus
Dis.W6-48549-006.v1.1AG00551.t1	KAG2657276.1hypothetical protein PVAP13_1KG181800	277	EC:2.7.11.1	non-specific serine/threonine protein kinase	noIPR;IPR001611;IPR032675;noIPR;noIPR	Protein kinase-like domain superfamily;Leucine-rich repeat;Leucine-rich repeat domain superfamily;Leucine-rich repeat domain superfamily;Leucine-rich repeat domain superfamily	GO:0004674;GO:0005524;GO:0016020	protein serine/threonine kinase activity;ATP binding;membrane
Dis.W6-48549-006.v1.1AG00551.t2	KAG2657276.1hypothetical protein PVAP13_1KG181800	282	EC:2.7.11.1	non-specific serine/threonine protein kinase	noIPR;IPR032675;IPR032675;IPR001611;noIPR;noIPR	Homeobox-like domain superfamily;Leucine-rich repeat domain superfamily;Leucine-rich repeat domain superfamily;Leucine-rich repeat;Leucine-rich repeat;Leucine-rich repeat	GO:0004674;GO:0005524;GO:0016020	protein serine/threonine kinase activity;ATP binding;membrane
Dis.W6-48549-006.v1.1AG00552.t1	KXG29874.1hypothetical protein SORBI_3004G102100	480	EC:2.7.11.1	non-specific serine/threonine protein kinase	noIPR;noIPR;IPR000719;IPR001245;IPR021720;noIPR;noIPR;noIPR;noIPR;noIPR;noIPR;noIPR;noIPR;noIPR;noIPR;noIPR;noIPR;noIPR;noIPR;noIPR;noIPR;noIPR;noIPR;noIPR;noIPR;noIPR;noIPR;noIPR;noIPR;noIPR;noIPR;noIPR;noIPR;noIPR;noIPR;noIPR;noIPR;noIPR;noIPR;noIPR;noIPR;noIPR;noIPR;noIPR;noIPR;noIPR;noIPR;noIPR;noIPR;noIPR;noIPR;noIPR;noIPR;noIPR;noIPR;noIPR;noIPR;noIPR;noIPR;noIPR;noIPR;noIPR;noIPR;noIPR;noI…	Zinc finger C2H2-type;Zinc finger C2H2-type;Protein kinase domain;Serine-threonine/tyrosine-protein kinase, catalytic domain;Malectin domain;Malectin domain;Malectin domain;Malectin domain;Malectin domain;Malectin domain;Malectin domain;Malectin domain;Malectin domain;Malectin domain;Malectin domain;Malectin domain;Malectin domain;Malectin domain;Malectin domain;Malectin domain;Malectin domain;Ma…	GO:0004674;GO:0005524;GO:0016020	protein serine/threonine kinase activity;ATP binding;membrane
Dis.W6-48549-006.v1.1AG00552.t2	KXG29874.1hypothetical protein SORBI_3004G102100	477	EC:2.7.11.1	non-specific serine/threonine protein kinase	noIPR;noIPR;IPR000719;IPR001245;noIPR;noIPR;IPR021720;noIPR;noIPR;noIPR;noIPR;noIPR;noIPR;noIPR;noIPR;noIPR;noIPR;noIPR;noIPR;noIPR;noIPR;noIPR;noIPR;noIPR;noIPR;noIPR;noIPR;noIPR;noIPR;noIPR;noIPR;noIPR;noIPR;noIPR;noIPR;noIPR;noIPR;noIPR;noIPR;noIPR;noIPR;noIPR;noIPR;noIPR;noIPR;noIPR;noIPR;noIPR;noIPR;noIPR;noIPR;noIPR;noIPR;noIPR;noIPR;noIPR;noIPR;noIPR;noIPR;noIPR;noIPR;noIPR;noIPR;noIPR;noI…	Autonomous transposable element EN-1 mosaic protein;Autonomous transposable element EN-1 mosaic protein;Protein kinase domain;Serine-threonine/tyrosine-protein kinase, catalytic domain;Serine-threonine/tyrosine-protein kinase, catalytic domain;Serine-threonine/tyrosine-protein kinase, catalytic domain;Malectin domain;Malectin domain;Malectin domain;Malectin domain;Malectin domain;Malectin domain;…	GO:0004674;GO:0005524;GO:0016020	protein serine/threonine kinase activity;ATP binding;membrane
Dis.W6-48549-006.v1.1AG00552.t3	KXG29875.1hypothetical protein SORBI_3004G102100	310	EC:2.7.1	Transferring phosphorus-containing groups	noIPR;noIPR;IPR000719;noIPR;IPR021720;IPR000719;noIPR;noIPR;noIPR;noIPR;noIPR;noIPR;noIPR;noIPR;noIPR;noIPR;noIPR;noIPR;noIPR;noIPR;noIPR;noIPR;noIPR;noIPR;noIPR;noIPR;noIPR;noIPR;noIPR;noIPR;noIPR;noIPR;noIPR;noIPR;noIPR;noIPR;noIPR;noIPR;noIPR;noIPR;noIPR;noIPR;noIPR;noIPR;noIPR;noIPR;noIPR;noIPR;noIPR;noIPR;noIPR;noIPR;noIPR;noIPR;noIPR;noIPR;noIPR;noIPR;noIPR;noIPR;noIPR;noIPR;noIPR;noIPR;noI…	Rubisco accumulation factor 1;Rubisco accumulation factor 1;Protein kinase domain;Protein kinase domain;Malectin domain;Protein kinase domain;Protein kinase domain;Protein kinase domain;Protein kinase domain;Protein kinase domain;Protein kinase domain;Protein kinase domain;Protein kinase domain;Protein kinase domain;Protein kinase domain;Protein kinase domain;Protein kinase domain;Protein kinase …	GO:0004672	protein kinase activity
Dis.W6-48549-006.v1.1AG00552.t4	KXG29875.1hypothetical protein SORBI_3004G102100	310	EC:2.7.1	Transferring phosphorus-containing groups	noIPR;noIPR;IPR000719;noIPR;IPR000719;IPR021720;noIPR;noIPR;noIPR;noIPR;noIPR;noIPR;noIPR;noIPR;noIPR;noIPR;noIPR;noIPR;noIPR;noIPR;noIPR;noIPR;noIPR;noIPR;noIPR;noIPR;noIPR;noIPR;noIPR;noIPR;noIPR;noIPR;noIPR;noIPR;noIPR;noIPR;noIPR;noIPR;noIPR;noIPR;noIPR;noIPR;noIPR;noIPR;noIPR;noIPR;noIPR;noIPR;noIPR;noIPR;noIPR;noIPR;noIPR;noIPR;noIPR;noIPR;noIPR;noIPR;noIPR;noIPR;noIPR;noIPR;noIPR;noIPR;noI…	LDOC1-related;LDOC1-related;Protein kinase domain;Protein kinase domain;Protein kinase domain;Malectin domain;Malectin domain;Malectin domain;Malectin domain;Malectin domain;Malectin domain;Malectin domain;Malectin domain;Malectin domain;Malectin domain;Malectin domain;Malectin domain;Malectin domain;Malectin domain;Malectin domain;Malectin domain;Malectin domain;Malectin domain;Malectin domain;M…	GO:0004672	protein kinase activity
Dis.W6-48549-006.v1.1AG00552.t5	KAG2657277.1hypothetical protein PVAP13_1KG181800	504	EC:2.7.11.1	non-specific serine/threonine protein kinase	noIPR;noIPR;IPR000719;noIPR;noIPR;IPR001245;noIPR;noIPR;noIPR;noIPR;noIPR;noIPR;noIPR;noIPR;noIPR;noIPR;noIPR;noIPR;noIPR;noIPR;noIPR;noIPR;noIPR;noIPR;noIPR;noIPR;noIPR;noIPR;noIPR;noIPR;noIPR;noIPR;noIPR;noIPR;noIPR;noIPR;noIPR;noIPR;noIPR;noIPR;noIPR;noIPR;noIPR;noIPR;noIPR;noIPR;noIPR;noIPR;noIPR;noIPR;noIPR;noIPR;noIPR;noIPR;noIPR;noIPR;noIPR;noIPR;noIPR;noIPR;noIPR;noIPR;noIPR;noIPR;noIPR;n…	Nucleic acid-binding, OB-fold;Nucleic acid-binding, OB-fold;Protein kinase domain;Protein kinase domain;Protein kinase domain;Serine-threonine/tyrosine-protein kinase, catalytic domain;Serine-threonine/tyrosine-protein kinase, catalytic domain;Serine-threonine/tyrosine-protein kinase, catalytic domain;Serine-threonine/tyrosine-protein kinase, catalytic domain;Serine-threonine/tyrosine-protein kin…	GO:0004674;GO:0005524;GO:0016020	protein serine/threonine kinase activity;ATP binding;membrane
Dis.W6-48549-006.v1.1AG00553.t1	-	107
Dis.W6-48549-006.v1.1AG00554.t1	QNS29845.1Silicon transporter	327			IPR000425;noIPR;IPR000425;IPR000425;IPR023271;noIPR;IPR034294;IPR022357;IPR000425;IPR023271	Major intrinsic protein;Major intrinsic protein;Major intrinsic protein;Major intrinsic protein;Aquaporin-like;Aquaporin-like;Aquaporin transporter;Major intrinsic protein, conserved site;Major intrinsic protein;Aquaporin-like	GO:0006833;GO:0015267;GO:0015793;GO:0016020	water transport;channel activity;glycerol transmembrane transport;membrane
Dis.W6-48549-006.v1.1AG00555.t1	TVU33185.1hypothetical protein EJB05_24971	529			noIPR;IPR000306;IPR013083;IPR007461;IPR000306;noIPR;noIPR;noIPR;IPR017455;noIPR;IPR011011	Nucleotidyltransferase superfamily;FYVE zinc finger;Zinc finger, RING/FYVE/PHD-type;Ysc84 actin-binding domain;FYVE zinc finger;FYVE zinc finger;FYVE zinc finger;FYVE zinc finger;Zinc finger, FYVE-related;Zinc finger, FYVE-related;Zinc finger, FYVE/PHD-type	GO:0035091;GO:0046872	phosphatidylinositol binding;metal ion binding
Dis.W6-48549-006.v1.1AG00556.t1	KAG8070198.1hypothetical protein GUJ93_ZPchr0006g44138	390			IPR008540;noIPR;noIPR;noIPR;IPR033264	BES1/BZR1 plant transcription factor, N-terminal;BES1/BZR1 plant transcription factor, N-terminal;BES1/BZR1 plant transcription factor, N-terminal;BES1/BZR1 plant transcription factor, N-terminal;BZR family
Dis.W6-48549-006.v1.1AG00556.t2	KAG8070198.1hypothetical protein GUJ93_ZPchr0006g44138	326			IPR033264	BZR family
Dis.W6-48549-006.v1.1AG00557.t1	TVU33193.1hypothetical protein EJB05_24981	535			IPR011042;IPR001258;noIPR;noIPR;noIPR;noIPR;noIPR;noIPR	Six-bladed beta-propeller, TolB-like;NHL repeat;NHL repeat;NHL repeat;NHL repeat;NHL repeat;NHL repeat;NHL repeat
Dis.W6-48549-006.v1.1AG00558.t1	GJM90690.1hypothetical protein PR202_ga06993	729	EC:2.3.2	Acyltransferases	noIPR;noIPR;IPR003613;IPR000225;IPR013083;IPR006911;IPR003613;IPR011989;IPR011989;noIPR;IPR003613;IPR000225;IPR045210;noIPR;IPR016024	Ion channel CASTOR/POLLUX/SYM8-like;Ion channel CASTOR/POLLUX/SYM8-like;U-box domain;Armadillo;Zinc finger, RING/FYVE/PHD-type;Armadillo repeat-containing domain;U-box domain;Armadillo-like helical;Armadillo-like helical;Armadillo-like helical;U-box domain;Armadillo;PUB protein, U-box domain, plant;PUB protein, U-box domain, plant;Armadillo-type fold	GO:0004842;GO:0005634;GO:0005737;GO:0016567;GO:0098542	ubiquitin-protein transferase activity;nucleus;cytoplasm;protein ubiquitination;defense response to other organism
Dis.W6-48549-006.v1.1AG00559.t1	GJM90694.1hypothetical protein PR202_ga06997	85			noIPR;noIPR	Pentatricopeptide repeat;Pentatricopeptide repeat	GO:0016020	membrane
Dis.W6-48549-006.v1.1AG00559.t2	GJM90694.1hypothetical protein PR202_ga06997	82			noIPR;noIPR	Ribonuclease H-like superfamily;Ribonuclease H-like superfamily	GO:0016020	membrane
Dis.W6-48549-006.v1.1AG00560.t1	ONM52023.1Actin-related protein 2/3 complex subunit 3	232			noIPR;IPR007204;IPR036753;IPR007204;IPR036753	Retrotransposon gag domain;Actin-related protein 2/3 complex subunit 3;Actin-related protein 2/3 complex subunit 3 superfamily;Actin-related protein 2/3 complex subunit 3;Actin-related protein 2/3 complex subunit 3 superfamily	GO:0005737;GO:0005885;GO:0030833;GO:0034314;GO:0051015	cytoplasm;Arp2/3 protein complex;regulation of actin filament polymerization;Arp2/3 complex-mediated actin nucleation;actin filament binding
Dis.W6-48549-006.v1.1AG00561.t1	TVU33207.1hypothetical protein EJB05_24997	814			IPR038770;IPR006153;noIPR;noIPR	Sodium/solute symporter superfamily;Cation/H+ exchanger;Cation/H+ exchanger;Cation/H+ exchanger	GO:0006885;GO:0009941;GO:0012505;GO:0015297;GO:0016020;GO:1902600	regulation of pH;chloroplast envelope;endomembrane system;antiporter activity;membrane;proton transmembrane transport
Dis.W6-48549-006.v1.1AG00562.t1	OEL30563.1Aspartate aminotransferase, mitochondrial	427	EC:2.6.1.1	aspartate transaminase	IPR000796;noIPR;noIPR;IPR015421;IPR004839;IPR015422;IPR000796;IPR004838;noIPR;IPR015424	Aspartate/other aminotransferase;Aspartate/other aminotransferase;Aspartate/other aminotransferase;Pyridoxal phosphate-dependent transferase, major domain;Aminotransferase, class I/classII;Pyridoxal phosphate-dependent transferase, small domain;Aspartate/other aminotransferase;Aminotransferases, class-I, pyridoxal-phosphate-binding site;Aminotransferases, class-I, pyridoxal-phosphate-binding site…	GO:0004069;GO:0005739;GO:0006520;GO:0009058;GO:0030170	L-aspartate:2-oxoglutarate aminotransferase activity;mitochondrion;amino acid metabolic process;biosynthetic process;pyridoxal phosphate binding
Dis.W6-48549-006.v1.1AG00562.t2	BAA04993.1aspartate aminotransferase	427	EC:2.6.1.1	aspartate transaminase	IPR000796;noIPR;noIPR;IPR015421;IPR004839;IPR015422;IPR000796;IPR004838;noIPR;IPR015424	Aspartate/other aminotransferase;Aspartate/other aminotransferase;Aspartate/other aminotransferase;Pyridoxal phosphate-dependent transferase, major domain;Aminotransferase, class I/classII;Pyridoxal phosphate-dependent transferase, small domain;Aspartate/other aminotransferase;Aminotransferases, class-I, pyridoxal-phosphate-binding site;Aminotransferases, class-I, pyridoxal-phosphate-binding site…	GO:0004069;GO:0005739;GO:0006520;GO:0009058;GO:0030170	L-aspartate:2-oxoglutarate aminotransferase activity;mitochondrion;amino acid metabolic process;biosynthetic process;pyridoxal phosphate binding
Dis.W6-48549-006.v1.1AG00563.t1	-	71
Dis.W6-48549-006.v1.1AG00564.t1	AHA12405.1somatic embryogenesis receptor kinase 1, partial	435	EC:2.7.11.1	non-specific serine/threonine protein kinase	noIPR;IPR000719;noIPR;IPR032675;IPR000719;noIPR;noIPR;noIPR;noIPR;noIPR;noIPR;noIPR;noIPR;noIPR;noIPR;noIPR;noIPR;noIPR;noIPR;noIPR;noIPR;noIPR;noIPR;noIPR;noIPR;noIPR;noIPR;noIPR;noIPR;noIPR;noIPR;noIPR;noIPR;noIPR;noIPR;noIPR;noIPR;noIPR;noIPR;noIPR;noIPR;noIPR;noIPR;noIPR;noIPR;noIPR;noIPR;noIPR;noIPR;noIPR;noIPR;noIPR;noIPR;noIPR;noIPR;noIPR;noIPR;noIPR;noIPR;noIPR;noIPR;noIPR;noIPR;noIPR;IPR…	Globin-like superfamily;Protein kinase domain;Protein kinase domain;Leucine-rich repeat domain superfamily;Protein kinase domain;Protein kinase domain;Protein kinase domain;Protein kinase domain;Protein kinase domain;Protein kinase domain;Protein kinase domain;Protein kinase domain;Protein kinase domain;Protein kinase domain;Protein kinase domain;Protein kinase domain;Protein kinase domain;Protei…	GO:0004674;GO:0005524;GO:0007639;GO:0015026;GO:0016020;GO:0016310;GO:0048653	protein serine/threonine kinase activity;ATP binding;homeostasis of number of meristem cells;coreceptor activity;membrane;phosphorylation;anther development
Dis.W6-48549-006.v1.1AG00564.t2	AHA12405.1somatic embryogenesis receptor kinase 1, partial	448	EC:2.7	Transferring phosphorus-containing groups	noIPR;noIPR;IPR000719;IPR000719;noIPR;noIPR;IPR032675;noIPR;noIPR;noIPR;noIPR;noIPR;noIPR;noIPR;noIPR;noIPR;noIPR;noIPR;noIPR;noIPR;noIPR;noIPR;noIPR;noIPR;noIPR;noIPR;noIPR;noIPR;noIPR;noIPR;noIPR;noIPR;noIPR;noIPR;noIPR;noIPR;noIPR;noIPR;noIPR;noIPR;noIPR;noIPR;noIPR;noIPR;noIPR;noIPR;noIPR;noIPR;IPR008271;IPR000719;noIPR;IPR011009	Expansin, cellulose-binding-like domain superfamily;Expansin, cellulose-binding-like domain superfamily;Protein kinase domain;Protein kinase domain;Protein kinase domain;Protein kinase domain;Leucine-rich repeat domain superfamily;Leucine-rich repeat domain superfamily;Leucine-rich repeat domain superfamily;Leucine-rich repeat domain superfamily;Leucine-rich repeat domain superfamily;Leucine-rich…	GO:0016301	kinase activity
Dis.W6-48549-006.v1.1AG00565.t1	RLM78496.1hypothetical protein C2845_PM12G07800	408	EC:2.7.11.1	non-specific serine/threonine protein kinase	noIPR;noIPR;IPR000719;noIPR;IPR000719;noIPR;noIPR;noIPR;noIPR;noIPR;noIPR;noIPR;noIPR;noIPR;noIPR;noIPR;noIPR;noIPR;noIPR;noIPR;noIPR;noIPR;noIPR;noIPR;noIPR;noIPR;noIPR;noIPR;noIPR;noIPR;noIPR;noIPR;noIPR;noIPR;noIPR;noIPR;noIPR;noIPR;noIPR;noIPR;noIPR;noIPR;noIPR;noIPR;noIPR;noIPR;noIPR;noIPR;noIPR;noIPR;noIPR;noIPR;noIPR;noIPR;noIPR;noIPR;noIPR;noIPR;noIPR;noIPR;noIPR;noIPR;noIPR;noIPR;noIPR;n…	Reverse transcriptase, RNA-dependent DNA polymerase;Reverse transcriptase, RNA-dependent DNA polymerase;Protein kinase domain;Protein kinase domain;Protein kinase domain;Protein kinase domain;Protein kinase domain;Protein kinase domain;Protein kinase domain;Protein kinase domain;Protein kinase domain;Protein kinase domain;Protein kinase domain;Protein kinase domain;Protein kinase domain;Protein k…	GO:0004674;GO:0005524;GO:0005737;GO:0007165;GO:0016310	protein serine/threonine kinase activity;ATP binding;cytoplasm;signal transduction;phosphorylation
Dis.W6-48549-006.v1.1AG00566.t1	GJM90702.1hypothetical protein PR202_ga07007	316	EC:1.11.1.7	peroxidase	IPR000823;IPR002016;noIPR;noIPR;noIPR;IPR002016;noIPR;noIPR;noIPR;noIPR;noIPR;noIPR;IPR000823;IPR019794;IPR019793;IPR002016;IPR033905;IPR010255	Plant peroxidase;Haem peroxidase;Haem peroxidase;Haem peroxidase;Haem peroxidase;Haem peroxidase;Haem peroxidase;Haem peroxidase;Haem peroxidase;Haem peroxidase;Haem peroxidase;Haem peroxidase;Plant peroxidase;Peroxidase, active site;Peroxidases heam-ligand binding site;Haem peroxidase;Secretory peroxidase;Haem peroxidase superfamily	GO:0005576;GO:0006979;GO:0020037;GO:0042744;GO:0046872;GO:0098869;GO:0140825	extracellular region;response to oxidative stress;heme binding;hydrogen peroxide catabolic process;metal ion binding;cellular oxidant detoxification;lactoperoxidase activity
Dis.W6-48549-006.v1.1AG00567.t1	TVU33205.1hypothetical protein EJB05_24995, partial	368	EC:1.11.1.7	peroxidase	IPR002016;IPR000823;noIPR;noIPR;noIPR;IPR002016;noIPR;noIPR;noIPR;noIPR;noIPR;noIPR;IPR000823;IPR019793;IPR019794;IPR002016;IPR033905;IPR010255	Haem peroxidase;Plant peroxidase;Plant peroxidase;Plant peroxidase;Plant peroxidase;Haem peroxidase;Haem peroxidase;Haem peroxidase;Haem peroxidase;Haem peroxidase;Haem peroxidase;Haem peroxidase;Plant peroxidase;Peroxidases heam-ligand binding site;Peroxidase, active site;Haem peroxidase;Secretory peroxidase;Haem peroxidase superfamily	GO:0005576;GO:0006979;GO:0020037;GO:0042744;GO:0046872;GO:0098869;GO:0140825	extracellular region;response to oxidative stress;heme binding;hydrogen peroxide catabolic process;metal ion binding;cellular oxidant detoxification;lactoperoxidase activity
Dis.W6-48549-006.v1.1AG00568.t1	-	80
Dis.W6-48549-006.v1.1AG00569.t1	TVU33216.1hypothetical protein EJB05_25006, partial	349	EC:1.11.1.7	peroxidase	IPR002016;IPR000823;noIPR;noIPR;noIPR;IPR002016;noIPR;noIPR;noIPR;noIPR;noIPR;noIPR;IPR000823;IPR019793;IPR019794;IPR002016;IPR033905;IPR010255	Haem peroxidase;Plant peroxidase;Plant peroxidase;Plant peroxidase;Plant peroxidase;Haem peroxidase;Haem peroxidase;Haem peroxidase;Haem peroxidase;Haem peroxidase;Haem peroxidase;Haem peroxidase;Plant peroxidase;Peroxidases heam-ligand binding site;Peroxidase, active site;Haem peroxidase;Secretory peroxidase;Haem peroxidase superfamily	GO:0005576;GO:0006979;GO:0020037;GO:0042744;GO:0046872;GO:0098869;GO:0140825	extracellular region;response to oxidative stress;heme binding;hydrogen peroxide catabolic process;metal ion binding;cellular oxidant detoxification;lactoperoxidase activity
Dis.W6-48549-006.v1.1AG00570.t1	XP_006647109.1thermospermine synthase ACAULIS5	331	EC:2.5.1.79;EC:2.5.1.22;EC:2.1.1	thermospermine synthase;spermine synthase;Transferring one-carbon groups	noIPR;noIPR;IPR037163;noIPR;IPR035246;IPR029063;noIPR;IPR001045;IPR030374;noIPR;IPR029063	Retrotransposon gag domain;Retrotransposon gag domain;Spermidine synthase, tetramerisation domain superfamily;Spermidine synthase, tetramerisation domain superfamily;Spermidine synthase, tetramerisation domain;S-adenosyl-L-methionine-dependent methyltransferase superfamily;S-adenosyl-L-methionine-dependent methyltransferase superfamily;Spermidine/spermine synthases;Polyamine biosynthesis domain;P…	GO:0006596;GO:0008757;GO:0009926;GO:0010487;GO:0016768;GO:0048759	polyamine biosynthetic process;S-adenosylmethionine-dependent methyltransferase activity;auxin polar transport;thermospermine synthase activity;spermine synthase activity;xylem vessel member cell differentiation
Dis.W6-48549-006.v1.1AG00571.t1	XP_039788901.1peroxidase P7-like	320	EC:1.11.1.7	peroxidase	IPR002016;IPR000823;noIPR;noIPR;noIPR;IPR002016;noIPR;noIPR;noIPR;noIPR;noIPR;noIPR;IPR000823;IPR019794;IPR019793;IPR002016;IPR033905;IPR010255	Haem peroxidase;Plant peroxidase;Plant peroxidase;Plant peroxidase;Plant peroxidase;Haem peroxidase;Haem peroxidase;Haem peroxidase;Haem peroxidase;Haem peroxidase;Haem peroxidase;Haem peroxidase;Plant peroxidase;Peroxidase, active site;Peroxidases heam-ligand binding site;Haem peroxidase;Secretory peroxidase;Haem peroxidase superfamily	GO:0005576;GO:0006979;GO:0020037;GO:0042744;GO:0046872;GO:0098869;GO:0140825	extracellular region;response to oxidative stress;heme binding;hydrogen peroxide catabolic process;metal ion binding;cellular oxidant detoxification;lactoperoxidase activity
Dis.W6-48549-006.v1.1AG00572.t1	GJN19425.1hypothetical protein PR202_gb06703	350	EC:1.11.1.7	peroxidase	IPR002016;IPR000823;noIPR;noIPR;IPR002016;noIPR;noIPR;noIPR;noIPR;noIPR;noIPR;noIPR;noIPR;noIPR;IPR000823;IPR019794;IPR019793;IPR002016;IPR033905;IPR010255	Haem peroxidase;Plant peroxidase;Plant peroxidase;Plant peroxidase;Haem peroxidase;Haem peroxidase;Haem peroxidase;Haem peroxidase;Haem peroxidase;Haem peroxidase;Haem peroxidase;Haem peroxidase;Haem peroxidase;Haem peroxidase;Plant peroxidase;Peroxidase, active site;Peroxidases heam-ligand binding site;Haem peroxidase;Secretory peroxidase;Haem peroxidase superfamily	GO:0005576;GO:0006979;GO:0020037;GO:0042744;GO:0046872;GO:0098869;GO:0140825	extracellular region;response to oxidative stress;heme binding;hydrogen peroxide catabolic process;metal ion binding;cellular oxidant detoxification;lactoperoxidase activity
Dis.W6-48549-006.v1.1AG00573.t1	XP_034586558.1serine/threonine-protein kinase EDR1-like isoform X2	788	EC:2.7.11.1	non-specific serine/threonine protein kinase	noIPR;IPR000719;noIPR;IPR001245;noIPR;noIPR;noIPR;noIPR;noIPR;noIPR;noIPR;noIPR;noIPR;noIPR;noIPR;noIPR;noIPR;noIPR;noIPR;noIPR;noIPR;noIPR;noIPR;noIPR;noIPR;noIPR;noIPR;noIPR;noIPR;noIPR;noIPR;noIPR;noIPR;noIPR;noIPR;noIPR;noIPR;noIPR;noIPR;noIPR;noIPR;noIPR;noIPR;noIPR;noIPR;noIPR;noIPR;noIPR;noIPR;noIPR;noIPR;noIPR;noIPR;noIPR;noIPR;noIPR;noIPR;noIPR;noIPR;noIPR;noIPR;noIPR;noIPR;noIPR;noIPR;n…	HAD-like superfamily;Protein kinase domain;Protein kinase domain;Serine-threonine/tyrosine-protein kinase, catalytic domain;Serine-threonine/tyrosine-protein kinase, catalytic domain;Serine-threonine/tyrosine-protein kinase, catalytic domain;Serine-threonine/tyrosine-protein kinase, catalytic domain;Serine-threonine/tyrosine-protein kinase, catalytic domain;Serine-threonine/tyrosine-protein kinas…	GO:0004674;GO:0005524;GO:0016310	protein serine/threonine kinase activity;ATP binding;phosphorylation
Dis.W6-48549-006.v1.1AG00573.t2	XP_034586552.1serine/threonine-protein kinase EDR1-like isoform X1	764	EC:2.7.11.1	non-specific serine/threonine protein kinase	noIPR;IPR000719;IPR001245;noIPR;noIPR;noIPR;noIPR;noIPR;noIPR;noIPR;noIPR;noIPR;noIPR;noIPR;noIPR;noIPR;noIPR;noIPR;noIPR;noIPR;noIPR;noIPR;noIPR;noIPR;noIPR;noIPR;noIPR;noIPR;noIPR;noIPR;noIPR;noIPR;noIPR;noIPR;noIPR;noIPR;noIPR;noIPR;noIPR;noIPR;noIPR;noIPR;noIPR;noIPR;noIPR;noIPR;noIPR;noIPR;noIPR;noIPR;noIPR;noIPR;noIPR;noIPR;noIPR;noIPR;noIPR;noIPR;noIPR;noIPR;noIPR;noIPR;noIPR;noIPR;noIPR;n…	AMP-binding, conserved site;Protein kinase domain;Serine-threonine/tyrosine-protein kinase, catalytic domain;Serine-threonine/tyrosine-protein kinase, catalytic domain;Serine-threonine/tyrosine-protein kinase, catalytic domain;Serine-threonine/tyrosine-protein kinase, catalytic domain;Serine-threonine/tyrosine-protein kinase, catalytic domain;Serine-threonine/tyrosine-protein kinase, catalytic do…	GO:0004674;GO:0005524;GO:0016310	protein serine/threonine kinase activity;ATP binding;phosphorylation
Dis.W6-48549-006.v1.1AG00573.t3	XP_034586552.1serine/threonine-protein kinase EDR1-like isoform X1	748	EC:2.7.11.1	non-specific serine/threonine protein kinase	noIPR;IPR000719;noIPR;noIPR;IPR001245;noIPR;noIPR;noIPR;noIPR;noIPR;noIPR;noIPR;noIPR;noIPR;noIPR;noIPR;noIPR;noIPR;noIPR;noIPR;noIPR;noIPR;noIPR;noIPR;noIPR;noIPR;noIPR;noIPR;noIPR;noIPR;noIPR;noIPR;noIPR;noIPR;noIPR;noIPR;noIPR;noIPR;noIPR;noIPR;noIPR;noIPR;noIPR;noIPR;noIPR;noIPR;noIPR;noIPR;noIPR;noIPR;noIPR;noIPR;noIPR;noIPR;noIPR;noIPR;noIPR;noIPR;noIPR;noIPR;noIPR;noIPR;noIPR;noIPR;noIPR;n…	Cyclin-like superfamily;Protein kinase domain;Protein kinase domain;Protein kinase domain;Serine-threonine/tyrosine-protein kinase, catalytic domain;Serine-threonine/tyrosine-protein kinase, catalytic domain;Serine-threonine/tyrosine-protein kinase, catalytic domain;Serine-threonine/tyrosine-protein kinase, catalytic domain;Serine-threonine/tyrosine-protein kinase, catalytic domain;Serine-threoni…	GO:0004674;GO:0005524;GO:0016310	protein serine/threonine kinase activity;ATP binding;phosphorylation
Dis.W6-48549-006.v1.1AG00574.t1	KAG0532528.1hypothetical protein BDA96_04G115100	493	EC:2.4.1	Glycosyltransferases	noIPR;noIPR;IPR002213;noIPR;noIPR;noIPR;IPR035595;IPR002213;noIPR	NAD(P)-binding domain superfamily;NAD(P)-binding domain superfamily;UDP-glucuronosyl/UDP-glucosyltransferase;UDP-glucuronosyl/UDP-glucosyltransferase;UDP-glucuronosyl/UDP-glucosyltransferase;UDP-glucuronosyl/UDP-glucosyltransferase;UDP-glycosyltransferase family, conserved site;UDP-glucuronosyl/UDP-glucosyltransferase;UDP-glucuronosyl/UDP-glucosyltransferase	GO:0035251	UDP-glucosyltransferase activity
Dis.W6-48549-006.v1.1AG00575.t1	TVU14069.1hypothetical protein EJB05_37515, partial	131			noIPR	Magnesium transporter NIPA
Dis.W6-48549-006.v1.1AG00575.t2	TVU14069.1hypothetical protein EJB05_37515, partial	124			noIPR	Succinyl-CoA synthetase-like
Dis.W6-48549-006.v1.1AG00576.t1	-	104			noIPR;noIPR	Protein kinase-like domain superfamily;Protein kinase-like domain superfamily
Dis.W6-48549-006.v1.1AG00577.t1	XP_034578614.1hydroquinone glucosyltransferase-like	503	EC:2.4.1	Glycosyltransferases	noIPR;noIPR;IPR002213;noIPR;noIPR;noIPR;IPR035595;IPR002213;noIPR	Protein kinase-like domain superfamily;Protein kinase-like domain superfamily;UDP-glucuronosyl/UDP-glucosyltransferase;UDP-glucuronosyl/UDP-glucosyltransferase;UDP-glucuronosyl/UDP-glucosyltransferase;UDP-glucuronosyl/UDP-glucosyltransferase;UDP-glycosyltransferase family, conserved site;UDP-glucuronosyl/UDP-glucosyltransferase;UDP-glucuronosyl/UDP-glucosyltransferase	GO:0035251	UDP-glucosyltransferase activity
Dis.W6-48549-006.v1.1AG00578.t1	GJM90721.1hypothetical protein PR202_ga07028	963	EC:4.1.1.31;EC:4.1.1.32	phosphoenolpyruvate carboxylase;phosphoenolpyruvate carboxykinase (GTP)	IPR021135;noIPR;IPR021135;noIPR;IPR021135;IPR018129;IPR033129;IPR022805;IPR015813	Phosphoenolpyruvate carboxylase;Phosphoenolpyruvate carboxylase;Phosphoenolpyruvate carboxylase;Phosphoenolpyruvate carboxylase;Phosphoenolpyruvate carboxylase;Phosphoenolpyruvate carboxylase, Lys active site;Phosphoenolpyruvate carboxylase, His active site;Phosphoenolpyruvate carboxylase, bacterial/plant-type;Pyruvate/Phosphoenolpyruvate kinase-like domain superfamily	GO:0005829;GO:0006099;GO:0008964;GO:0015977;GO:0015979;GO:0048366	cytosol;tricarboxylic acid cycle;phosphoenolpyruvate carboxylase activity;carbon fixation;photosynthesis;leaf development
Dis.W6-48549-006.v1.1AG00578.t2	GJM90721.1hypothetical protein PR202_ga07028	1031	EC:4.1.1.31;EC:4.1.1.32	phosphoenolpyruvate carboxylase;phosphoenolpyruvate carboxykinase (GTP)	IPR021135;noIPR;noIPR;IPR021135;noIPR;noIPR;IPR021135;IPR018129;IPR033129;IPR022805;IPR015813	Phosphoenolpyruvate carboxylase;Phosphoenolpyruvate carboxylase;Phosphoenolpyruvate carboxylase;Phosphoenolpyruvate carboxylase;Phosphoenolpyruvate carboxylase;Phosphoenolpyruvate carboxylase;Phosphoenolpyruvate carboxylase;Phosphoenolpyruvate carboxylase, Lys active site;Phosphoenolpyruvate carboxylase, His active site;Phosphoenolpyruvate carboxylase, bacterial/plant-type;Pyruvate/Phosphoenolpyr…	GO:0005829;GO:0006099;GO:0008964;GO:0015977;GO:0015979;GO:0048366	cytosol;tricarboxylic acid cycle;phosphoenolpyruvate carboxylase activity;carbon fixation;photosynthesis;leaf development
Dis.W6-48549-006.v1.1AG00579.t1	-	72
Dis.W6-48549-006.v1.1AG00580.t1	TVU33241.1hypothetical protein EJB05_25031	348			noIPR;noIPR;noIPR;IPR000504;IPR012677;IPR000504;IPR009818;noIPR;noIPR;noIPR;IPR000504;IPR000504;IPR034823;IPR034825;IPR035979;IPR035979	DNA-binding domain superfamily;DNA-binding domain superfamily;DNA-binding domain superfamily;RNA recognition motif domain;Nucleotide-binding alpha-beta plait domain superfamily;RNA recognition motif domain;Ataxin-2, C-terminal;Ataxin-2, C-terminal;Ataxin-2, C-terminal;Ataxin-2, C-terminal;RNA recognition motif domain;RNA recognition motif domain;CID8-like protein, RNA recognition motif 1;CID8-lik…	GO:0003723	RNA binding
Dis.W6-48549-006.v1.1AG00581.t1	TVU33240.1hypothetical protein EJB05_25030	964	EC:3.4.19.12	ubiquitinyl hydrolase 1	noIPR;noIPR;IPR001394;noIPR;IPR002893;noIPR;noIPR;noIPR;noIPR;noIPR;noIPR;IPR018200;IPR002893;IPR028889;noIPR;noIPR;IPR038765	Pentatricopeptide repeat;Pentatricopeptide repeat;Peptidase C19, ubiquitin carboxyl-terminal hydrolase;Peptidase C19, ubiquitin carboxyl-terminal hydrolase;Zinc finger, MYND-type;Zinc finger, MYND-type;Zinc finger, MYND-type;Zinc finger, MYND-type;Zinc finger, MYND-type;Zinc finger, MYND-type;Zinc finger, MYND-type;Ubiquitin specific protease, conserved site;Zinc finger, MYND-type;Ubiquitin speci…	GO:0004843;GO:0005634;GO:0005829;GO:0009908;GO:0010154;GO:0016020;GO:0046872;GO:0048364;GO:0048366;GO:0051301	cysteine-type deubiquitinase activity;nucleus;cytosol;flower development;fruit development;membrane;metal ion binding;root development;leaf development;cell division
Dis.W6-48549-006.v1.1AG00581.t2	TVU33240.1hypothetical protein EJB05_25030	936	EC:3.4.19.12	ubiquitinyl hydrolase 1	noIPR;noIPR;IPR002893;noIPR;noIPR;IPR001394;noIPR;noIPR;noIPR;noIPR;noIPR;IPR018200;IPR002893;IPR028889;noIPR;IPR038765;noIPR	Protein of unknown function DUF2996;Protein of unknown function DUF2996;Zinc finger, MYND-type;Zinc finger, MYND-type;Zinc finger, MYND-type;Peptidase C19, ubiquitin carboxyl-terminal hydrolase;Peptidase C19, ubiquitin carboxyl-terminal hydrolase;Peptidase C19, ubiquitin carboxyl-terminal hydrolase;Peptidase C19, ubiquitin carboxyl-terminal hydrolase;Peptidase C19, ubiquitin carboxyl-terminal hyd…	GO:0004843;GO:0005634;GO:0005829;GO:0009908;GO:0010154;GO:0016020;GO:0046872;GO:0048364;GO:0048366;GO:0051301	cysteine-type deubiquitinase activity;nucleus;cytosol;flower development;fruit development;membrane;metal ion binding;root development;leaf development;cell division
Dis.W6-48549-006.v1.1AG00582.t1	TVU33242.1hypothetical protein EJB05_25032	425			noIPR;IPR039301;IPR001841;noIPR	Pentatricopeptide repeat;Protein Sip5/DA2;Zinc finger, RING-type;Zinc finger, RING-type
Dis.W6-48549-006.v1.1AG00582.t2	TVU33242.1hypothetical protein EJB05_25032	504			noIPR;noIPR;noIPR;IPR039301;IPR001841;noIPR	MULE transposase domain;MULE transposase domain;MULE transposase domain;Protein Sip5/DA2;Zinc finger, RING-type;Zinc finger, RING-type
Dis.W6-48549-006.v1.1AG00583.t1	GJN19438.1hypothetical protein PR202_gb06716	135			noIPR;noIPR;noIPR	Alpha/Beta hydrolase fold;Alpha/Beta hydrolase fold;Alpha/Beta hydrolase fold	GO:0005249;GO:0016020;GO:0034765;GO:0071805	voltage-gated potassium channel activity;membrane;regulation of monoatomic ion transmembrane transport;potassium ion transmembrane transport
Dis.W6-48549-006.v1.1AG00584.t1	TVU48644.1hypothetical protein EJB05_08285	114
Dis.W6-48549-006.v1.1AG00585.t1	TVU48648.1hypothetical protein EJB05_08289, partial	478	EC:2.1.1.37	DNA (cytosine-5-)-methyltransferase	IPR015940;noIPR;IPR029063;noIPR;noIPR;IPR015940;IPR030380;IPR015940;IPR009060;IPR029063	Ubiquitin-associated domain;Ubiquitin-associated domain;S-adenosyl-L-methionine-dependent methyltransferase superfamily;S-adenosyl-L-methionine-dependent methyltransferase superfamily;S-adenosyl-L-methionine-dependent methyltransferase superfamily;Ubiquitin-associated domain;SAM-dependent methyltransferase DRM;Ubiquitin-associated domain;UBA-like superfamily;S-adenosyl-L-methionine-dependent meth…	GO:0003886;GO:0005515;GO:0005634;GO:0090116	DNA (cytosine-5-)-methyltransferase activity;protein binding;nucleus;C-5 methylation of cytosine
Dis.W6-48549-006.v1.1AG00585.t2	TVU48648.1hypothetical protein EJB05_08289, partial	259	EC:2.1.1.37	DNA (cytosine-5-)-methyltransferase	IPR015940;noIPR;noIPR;noIPR;noIPR;noIPR;IPR015940;IPR015940;IPR009060	Ubiquitin-associated domain;Ubiquitin-associated domain;Ubiquitin-associated domain;Ubiquitin-associated domain;Ubiquitin-associated domain;Ubiquitin-associated domain;Ubiquitin-associated domain;Ubiquitin-associated domain;UBA-like superfamily	GO:0003886;GO:0005515;GO:0005634;GO:0006306	DNA (cytosine-5-)-methyltransferase activity;protein binding;nucleus;DNA methylation
Dis.W6-48549-006.v1.1AG00586.t1	GJN35700.1hypothetical protein PR202_gb24501	141			IPR036865;noIPR;IPR036273	CRAL-TRIO lipid binding domain superfamily;CRAL-TRIO lipid binding domain superfamily;CRAL/TRIO, N-terminal domain superfamily	GO:0008526;GO:0015914;GO:0120009	phosphatidylinositol transfer activity;phospholipid transport;intermembrane lipid transfer
Dis.W6-48549-006.v1.1AG00587.t1	ONL92800.1DNA (cytosine-5)-methyltransferase DRM2	124	EC:2.1.1.37	DNA (cytosine-5-)-methyltransferase	IPR001525;IPR029063;noIPR;IPR030380;IPR001525;IPR029063	C-5 cytosine methyltransferase;S-adenosyl-L-methionine-dependent methyltransferase superfamily;S-adenosyl-L-methionine-dependent methyltransferase superfamily;SAM-dependent methyltransferase DRM;C-5 cytosine methyltransferase;S-adenosyl-L-methionine-dependent methyltransferase superfamily	GO:0003886;GO:0005634;GO:0090116	DNA (cytosine-5-)-methyltransferase activity;nucleus;C-5 methylation of cytosine
Dis.W6-48549-006.v1.1AG00588.t1	TVU33243.1hypothetical protein EJB05_25033, partial	731			IPR003938;noIPR;noIPR;IPR000595;noIPR;noIPR;IPR005821;IPR014710;IPR021789;IPR000595;noIPR;IPR045319;IPR021789;IPR000595;IPR000595;IPR018490;noIPR	Potassium channel, voltage-dependent, EAG/ELK/ERG;Potassium channel, voltage-dependent, EAG/ELK/ERG;Potassium channel, voltage-dependent, EAG/ELK/ERG;Cyclic nucleotide-binding domain;Cyclic nucleotide-binding domain;Cyclic nucleotide-binding domain;Ion transport domain;RmlC-like jelly roll fold;KHA domain;Cyclic nucleotide-binding domain;Cyclic nucleotide-binding domain;Potassium channel KAT/AKT;…	GO:0005249;GO:0016020;GO:0034765;GO:0071805	voltage-gated potassium channel activity;membrane;regulation of monoatomic ion transmembrane transport;potassium ion transmembrane transport
Dis.W6-48549-006.v1.1AG00588.t2	TVU33243.1hypothetical protein EJB05_25033, partial	705			IPR003938;noIPR;noIPR;IPR000595;IPR005821;IPR000595;IPR014710;IPR021789;noIPR;noIPR;noIPR;IPR045319;IPR000595;IPR021789;IPR000595;noIPR;IPR018490	Potassium channel, voltage-dependent, EAG/ELK/ERG;Potassium channel, voltage-dependent, EAG/ELK/ERG;Potassium channel, voltage-dependent, EAG/ELK/ERG;Cyclic nucleotide-binding domain;Ion transport domain;Cyclic nucleotide-binding domain;RmlC-like jelly roll fold;KHA domain;KHA domain;KHA domain;KHA domain;Potassium channel KAT/AKT;Cyclic nucleotide-binding domain;KHA domain;Cyclic nucleotide-bind…	GO:0005249;GO:0016020;GO:0034765;GO:0071805	voltage-gated potassium channel activity;membrane;regulation of monoatomic ion transmembrane transport;potassium ion transmembrane transport
Dis.W6-48549-006.v1.1AG00589.t1	GJN19445.1hypothetical protein PR202_gb06724	234			noIPR;noIPR;IPR004827;noIPR;IPR004827;noIPR;noIPR;noIPR;IPR004827;IPR004827;IPR044759;IPR046347	Leucine-rich repeat domain superfamily;Leucine-rich repeat domain superfamily;Basic-leucine zipper domain;Basic-leucine zipper domain;Basic-leucine zipper domain;Basic-leucine zipper domain;Basic-leucine zipper domain;Basic-leucine zipper domain;Basic-leucine zipper domain;Basic-leucine zipper domain;RF2-like transcription factor, bZIP domain;Basic-leucine zipper domain superfamily	GO:0003677;GO:0003700;GO:0005634;GO:0045893	DNA binding;DNA-binding transcription factor activity;nucleus;positive regulation of DNA-templated transcription
Dis.W6-48549-006.v1.1AG00590.t1	TVU33250.1hypothetical protein EJB05_25041, partial	1650			noIPR;IPR021319;noIPR;IPR004837;IPR044880;noIPR;IPR021319;IPR018247;IPR002048;IPR002048;IPR011992	Basic-leucine zipper domain superfamily;Protein of unknown function DUF2921;Protein of unknown function DUF2921;Sodium/calcium exchanger membrane region;NCX, central ion-binding domain superfamily;NCX, central ion-binding domain superfamily;Protein of unknown function DUF2921;EF-Hand 1, calcium-binding site;EF-hand domain;EF-hand domain;EF-hand domain pair
Dis.W6-48549-006.v1.1AG00591.t1	TVU33251.1hypothetical protein EJB05_25042, partial	211			IPR001841;IPR013083;IPR001841;noIPR;IPR001841;noIPR	Zinc finger, RING-type;Zinc finger, RING/FYVE/PHD-type;Zinc finger, RING-type;Zinc finger, RING-type;Zinc finger, RING-type;Zinc finger, RING-type
Dis.W6-48549-006.v1.1AG00592.t1	TVU33278.1hypothetical protein EJB05_25071, partial	220			IPR001841;IPR013083;IPR001841;noIPR;IPR001841;noIPR	Zinc finger, RING-type;Zinc finger, RING/FYVE/PHD-type;Zinc finger, RING-type;Zinc finger, RING-type;Zinc finger, RING-type;Zinc finger, RING-type
Dis.W6-48549-006.v1.1AG00593.t1	XP_025823285.1uncharacterized protein LOC112899148	152			noIPR	CDP-alcohol phosphatidyltransferase
Dis.W6-48549-006.v1.1AG00594.t1	-	80
Dis.W6-48549-006.v1.1AG00595.t1	GJM90740.1hypothetical protein PR202_ga07048	163			noIPR	UDP-glucuronosyl/UDP-glucosyltransferase
Dis.W6-48549-006.v1.1AG00596.t1	-	139			noIPR	F-box-like domain superfamily
Dis.W6-48549-006.v1.1AG00597.t1	GJN19459.1hypothetical protein PR202_gb06738	227			IPR001841;IPR001841;IPR013083;noIPR;IPR001841;noIPR;noIPR	Zinc finger, RING-type;Zinc finger, RING-type;Zinc finger, RING/FYVE/PHD-type;Zinc finger, RING/FYVE/PHD-type;Zinc finger, RING-type;Zinc finger, RING-type;Zinc finger, RING-type
Dis.W6-48549-006.v1.1AG00598.t1	TVU33280.1hypothetical protein EJB05_25073, partial	192	EC:2.3.2	Acyltransferases	noIPR;IPR001841;IPR013083;IPR001841;noIPR;noIPR;IPR001841;noIPR;noIPR	Nuclear transcription factor Y subunit A;Zinc finger, RING-type;Zinc finger, RING/FYVE/PHD-type;Zinc finger, RING-type;Zinc finger, RING-type;Zinc finger, RING-type;Zinc finger, RING-type;Zinc finger, RING-type;Zinc finger, RING-type	GO:0006511;GO:0016020;GO:0061630	ubiquitin-dependent protein catabolic process;membrane;ubiquitin protein ligase activity
Dis.W6-48549-006.v1.1AG00599.t1	KAG0532567.1hypothetical protein BDA96_04G118300	212			noIPR;IPR001841;IPR001841;IPR013083;noIPR;IPR001841;noIPR;noIPR	Cullin repeat-like-containing domain superfamily;Zinc finger, RING-type;Zinc finger, RING-type;Zinc finger, RING/FYVE/PHD-type;Zinc finger, RING/FYVE/PHD-type;Zinc finger, RING-type;Zinc finger, RING-type;Zinc finger, RING-type
Dis.W6-48549-006.v1.1AG00600.t1	GJM90746.1hypothetical protein PR202_ga07055	211			noIPR;IPR001841;IPR001841;IPR013083;noIPR;noIPR;IPR001841;noIPR;noIPR	Zinc finger, CCCH-type superfamily;Zinc finger, RING-type;Zinc finger, RING-type;Zinc finger, RING/FYVE/PHD-type;Zinc finger, RING/FYVE/PHD-type;Zinc finger, RING/FYVE/PHD-type;Zinc finger, RING-type;Zinc finger, RING-type;Zinc finger, RING-type
Dis.W6-48549-006.v1.1AG00601.t1	-	154			noIPR;noIPR	Inositol monophosphatase;Inositol monophosphatase
Dis.W6-48549-006.v1.1AG00602.t1	GJM90750.1hypothetical protein PR202_ga07059	206			noIPR;IPR001841;IPR013083;IPR001841;noIPR;noIPR;noIPR;IPR001841;noIPR;noIPR	Citrate carrier CitT-related;Zinc finger, RING-type;Zinc finger, RING/FYVE/PHD-type;Zinc finger, RING-type;Zinc finger, RING-type;Zinc finger, RING-type;Zinc finger, RING-type;Zinc finger, RING-type;Zinc finger, RING-type;Zinc finger, RING-type	GO:0016020;GO:0016567	membrane;protein ubiquitination
Dis.W6-48549-006.v1.1AG00603.t1	TVU33264.1hypothetical protein EJB05_25055, partial	179	EC:6;EC:2.3.2	Ligases;Acyltransferases	IPR001841;IPR013083;IPR001841;noIPR;IPR001841;noIPR	Zinc finger, RING-type;Zinc finger, RING/FYVE/PHD-type;Zinc finger, RING-type;Zinc finger, RING-type;Zinc finger, RING-type;Zinc finger, RING-type	GO:0006511;GO:0016020;GO:0016874;GO:0061630	ubiquitin-dependent protein catabolic process;membrane;ligase activity;ubiquitin protein ligase activity
Dis.W6-48549-006.v1.1AG00604.t1	-	78
Dis.W6-48549-006.v1.1AG00605.t1	TVU33260.1hypothetical protein EJB05_25051	225	EC:1.10.9;EC:7.1.1.6	Acting on diphenols and related substances as donors;plastoquinol--plastocyanin reductase	IPR005805;noIPR;noIPR;IPR036922;noIPR;IPR017941;IPR014349;IPR017941;IPR023960;noIPR;IPR036922	Rieske iron-sulphur protein, C-terminal;Rieske iron-sulphur protein, C-terminal;Rieske iron-sulphur protein, C-terminal;Rieske [2Fe-2S] iron-sulphur domain superfamily;Rieske [2Fe-2S] iron-sulphur domain superfamily;Rieske [2Fe-2S] iron-sulphur domain;Rieske iron-sulphur protein;Rieske [2Fe-2S] iron-sulphur domain;Cytochrome b6-f complex iron-sulfur subunit;Cytochrome b6-f complex iron-sulfur sub…	GO:0005886;GO:0009496;GO:0009535;GO:0022900;GO:0045158;GO:0046872;GO:0051537;GO:0055085	plasma membrane;plastoquinol--plastocyanin reductase activity;chloroplast thylakoid membrane;electron transport chain;electron transporter, transferring electrons within cytochrome b6/f complex of photosystem II activity;metal ion binding;2 iron, 2 sulfur cluster binding;transmembrane transport
Dis.W6-48549-006.v1.1AG00606.t1	GJM90754.1hypothetical protein PR202_ga07064	98
Dis.W6-48549-006.v1.1AG00607.t1	-	132
Dis.W6-48549-006.v1.1AG00608.t1	-	77
Dis.W6-48549-006.v1.1AG00609.t1	TVU46830.1hypothetical protein EJB05_06399	170	EC:2.3.1	Acyltransferases			GO:0008374;GO:0016020	O-acyltransferase activity;membrane
Dis.W6-48549-006.v1.1AG00610.t1	-	75
Dis.W6-48549-006.v1.1AG00611.t1	GJN15152.1hypothetical protein PR202_gb02045	658			noIPR;noIPR;IPR001487;IPR001487;IPR038336;IPR036427;IPR027353;IPR001487;noIPR;noIPR;noIPR;noIPR;noIPR;noIPR;noIPR;noIPR;noIPR;IPR027353;IPR001487;IPR037377;IPR036427	Protein of unknown function DUF3007;Protein of unknown function DUF3007;Bromodomain;Bromodomain;NET domain superfamily;Bromodomain-like superfamily;NET domain;Bromodomain;Bromodomain;Bromodomain;Bromodomain;Bromodomain;Bromodomain;Bromodomain;Bromodomain;Bromodomain;Bromodomain;NET domain;Bromodomain;Putative transcription factor GTE, bromodomain;Bromodomain-like superfamily
Dis.W6-48549-006.v1.1AG00611.t2	GJN15152.1hypothetical protein PR202_gb02045	635			noIPR;noIPR;IPR001487;IPR001487;IPR038336;IPR036427;IPR001487;IPR027353;noIPR;noIPR;noIPR;noIPR;noIPR;noIPR;noIPR;noIPR;IPR027353;IPR001487;IPR037377;IPR036427	PWWP domain;PWWP domain;Bromodomain;Bromodomain;NET domain superfamily;Bromodomain-like superfamily;Bromodomain;NET domain;NET domain;NET domain;NET domain;NET domain;NET domain;NET domain;NET domain;NET domain;NET domain;Bromodomain;Putative transcription factor GTE, bromodomain;Bromodomain-like superfamily
Dis.W6-48549-006.v1.1AG00612.t1	TVU33285.1hypothetical protein EJB05_25078	377	EC:3.1	Acting on ester bonds	IPR036514;IPR001087;noIPR;IPR035669;noIPR	SGNH hydrolase superfamily;GDSL lipase/esterase;GDSL lipase/esterase;GDSL lipase/esterase-like, plant;GDSL lipase/esterase-like, plant	GO:0016788	hydrolase activity, acting on ester bonds
Dis.W6-48549-006.v1.1AG00613.t1	GJM90762.1hypothetical protein PR202_ga07072	767	EC:2.7.1	Transferring phosphorus-containing groups	noIPR;noIPR;noIPR;IPR000719;noIPR;IPR032675;noIPR;noIPR;IPR000719;noIPR;noIPR;noIPR;noIPR;noIPR;noIPR;noIPR;noIPR;noIPR;noIPR;noIPR;noIPR;noIPR;noIPR;noIPR;noIPR;noIPR;noIPR;noIPR;noIPR;noIPR;noIPR;noIPR;noIPR;noIPR;noIPR;noIPR;noIPR;noIPR;noIPR;noIPR;noIPR;noIPR;noIPR;noIPR;noIPR;noIPR;noIPR;noIPR;noIPR;noIPR;noIPR;noIPR;noIPR;noIPR;noIPR;noIPR;noIPR;noIPR;noIPR;noIPR;noIPR;noIPR;noIPR;noIPR;noI…	PUA-like superfamily;PUA-like superfamily;PUA-like superfamily;Protein kinase domain;Protein kinase domain;Leucine-rich repeat domain superfamily;Leucine-rich repeat domain superfamily;Leucine-rich repeat domain superfamily;Protein kinase domain;Protein kinase domain;Protein kinase domain;Protein kinase domain;Protein kinase domain;Protein kinase domain;Protein kinase domain;Protein kinase domain…	GO:0004672;GO:0005524;GO:0005886;GO:0016310	protein kinase activity;ATP binding;plasma membrane;phosphorylation
Dis.W6-48549-006.v1.1AG00614.t1	GJM90762.1hypothetical protein PR202_ga07072	183	EC:2.7.1	Transferring phosphorus-containing groups	noIPR;IPR001611;IPR013210;IPR032675;noIPR;noIPR;noIPR	Ribosomal protein L6, alpha-beta domain superfamily;Leucine-rich repeat;Leucine-rich repeat-containing N-terminal, plant-type;Leucine-rich repeat domain superfamily;Leucine-rich repeat domain superfamily;Leucine-rich repeat domain superfamily;Leucine-rich repeat domain superfamily	GO:0000166;GO:0004672;GO:0005886	nucleotide binding;protein kinase activity;plasma membrane
Dis.W6-48549-006.v1.1AG00615.t1	TVU33288.1hypothetical protein EJB05_25081, partial	656			noIPR;noIPR;noIPR;noIPR;noIPR;noIPR;noIPR;noIPR;noIPR;noIPR;noIPR;noIPR;noIPR;noIPR	Protein kinase-like domain superfamily;Protein kinase-like domain superfamily;Protein kinase-like domain superfamily;Protein kinase-like domain superfamily;Protein kinase-like domain superfamily;Protein kinase-like domain superfamily;Protein kinase-like domain superfamily;Protein kinase-like domain superfamily;Protein kinase-like domain superfamily;Protein kinase-like domain superfamily;Protein k…
Dis.W6-48549-006.v1.1AG00616.t1	-	137			noIPR	Pentatricopeptide repeat
Dis.W6-48549-006.v1.1AG00617.t1	TVU33283.1hypothetical protein EJB05_25076	185
Dis.W6-48549-006.v1.1AG00618.t1	GJM90765.1hypothetical protein PR202_ga07075	112			IPR008889;noIPR;IPR039608	VQ;VQ;VQ motif-containing protein 1/10
Dis.W6-48549-006.v1.1AG00619.t1	TVU33291.1hypothetical protein EJB05_25101, partial	302			IPR036093;IPR003441;noIPR;IPR003441;IPR036093	NAC domain superfamily;NAC domain;NAC domain;NAC domain;NAC domain superfamily
Dis.W6-48549-006.v1.1AG00620.t1	XP_039788968.1uncharacterized protein LOC120655280	82			noIPR	Glycosyl transferase, family 31
Dis.W6-48549-006.v1.1AG00620.t2	XP_039788968.1uncharacterized protein LOC120655280	125			noIPR;noIPR;noIPR	RNA-binding domain superfamily;RNA-binding domain superfamily;RNA-binding domain superfamily
Dis.W6-48549-006.v1.1AG00621.t1	RCV04614.1hypothetical protein SETIT_1G014500v2	485	EC:2.5.1.16;EC:2.1.1	spermidine synthase;Transferring one-carbon groups	noIPR;noIPR;IPR001045;IPR035246;noIPR;IPR029063;IPR037163;noIPR;IPR001045;IPR030373;IPR001045;IPR030374;noIPR;IPR029063	Synaptotagmin, plant;Synaptotagmin, plant;Spermidine/spermine synthases;Spermidine synthase, tetramerisation domain;Spermidine synthase, tetramerisation domain;S-adenosyl-L-methionine-dependent methyltransferase superfamily;Spermidine synthase, tetramerisation domain superfamily;Spermidine synthase, tetramerisation domain superfamily;Spermidine/spermine synthases;Polyamine biosynthesis domain, co…	GO:0004766;GO:0005829;GO:0008295;GO:0008757	spermidine synthase activity;cytosol;spermidine biosynthetic process;S-adenosylmethionine-dependent methyltransferase activity
Dis.W6-48549-006.v1.1AG00622.t1	PVH66565.1hypothetical protein PAHAL_1G281900	101	EC:1.6.3;EC:1.11.1	Acting on NADH or NADPH;Acting on a peroxide as acceptor	noIPR	Protein kinase-like domain superfamily	GO:0004601;GO:0050664;GO:0098869	peroxidase activity;oxidoreductase activity, acting on NAD(P)H, oxygen as acceptor;cellular oxidant detoxification
Dis.W6-48549-006.v1.1AG00623.t1	XP_015625480.1cyclic nucleotide-gated ion channel 1 isoform X2	430			noIPR;IPR000595;IPR014710;IPR005821;noIPR;IPR000595;IPR000595;noIPR;IPR018490	Mitochondrial carrier domain superfamily;Cyclic nucleotide-binding domain;RmlC-like jelly roll fold;Ion transport domain;Ion transport domain;Cyclic nucleotide-binding domain;Cyclic nucleotide-binding domain;Cyclic nucleotide-binding domain;Cyclic nucleotide-binding domain superfamily	GO:0005216;GO:0034220	monoatomic ion channel activity;monoatomic ion transmembrane transport
Dis.W6-48549-006.v1.1AG00624.t1	CAA0832560.1Uncharacterized mitochondrial protein AtMg00710, partial	122	EC:1	Oxidoreductases			GO:0016491;GO:0046914;GO:0071704;GO:0097159	oxidoreductase activity;transition metal ion binding;organic substance metabolic process;organic cyclic compound binding
Dis.W6-48549-006.v1.1AG00625.t1	TVU33292.1hypothetical protein EJB05_25102	364	EC:3.1.3.16	protein-serine/threonine phosphatase	noIPR;IPR001932;IPR001932;IPR001932;IPR036457;IPR015655;IPR000222;IPR001932;IPR001932;IPR036457	Protein kinase-like domain superfamily;PPM-type phosphatase-like domain;PPM-type phosphatase-like domain;PPM-type phosphatase-like domain;PPM-type phosphatase-like domain superfamily;Protein phosphatase 2C family;PPM-type phosphatase, divalent cation binding;PPM-type phosphatase-like domain;PPM-type phosphatase-like domain;PPM-type phosphatase-like domain superfamily	GO:0005739;GO:0009846;GO:0017018;GO:0046872	mitochondrion;pollen germination;myosin phosphatase activity;metal ion binding
Dis.W6-48549-006.v1.1AG00626.t1	GJN19491.1hypothetical protein PR202_gb06773	376			noIPR;noIPR;IPR001841;IPR000571;IPR013083;IPR000571;noIPR;noIPR;noIPR;noIPR;noIPR;IPR039971;IPR017907;IPR000571;IPR001841;noIPR;IPR036855;noIPR	Protein of unknown function DUF1365;Protein of unknown function DUF1365;Zinc finger, RING-type;Zinc finger, CCCH-type;Zinc finger, RING/FYVE/PHD-type;Zinc finger, CCCH-type;Zinc finger, CCCH-type;Zinc finger, CCCH-type;Zinc finger, CCCH-type;Zinc finger, CCCH-type;Zinc finger, CCCH-type;Pre-mRNA-splicing factor CWC24-like;Zinc finger, RING-type, conserved site;Zinc finger, CCCH-type;Zinc finger, …	GO:0003824;GO:0005684;GO:0034247;GO:0046872	catalytic activity;U2-type spliceosomal complex;snoRNA splicing;metal ion binding
Dis.W6-48549-006.v1.1AG00627.t1	TVU33305.1hypothetical protein EJB05_25115, partial	326			noIPR;IPR019587;IPR023393;noIPR;noIPR;noIPR	Aminoacyl-tRNA synthetase, class Ia, anticodon-binding;Polyketide cyclase/dehydrase;START-like domain superfamily;START-like domain superfamily;START-like domain superfamily;START-like domain superfamily	GO:0004864;GO:0005515;GO:0005634;GO:0005829;GO:0009409;GO:0009414;GO:0009738;GO:0009845;GO:0010427;GO:0038023;GO:1905183	protein phosphatase inhibitor activity;protein binding;nucleus;cytosol;response to cold;response to water deprivation;abscisic acid-activated signaling pathway;seed germination;abscisic acid binding;signaling receptor activity;negative regulation of protein serine/threonine phosphatase activity
Dis.W6-48549-006.v1.1AG00628.t1	-	82
Dis.W6-48549-006.v1.1AG00629.t1	CAD6251218.1unnamed protein product	448	EC:4;EC:3.2.1.15	Lyases;endo-polygalacturonase	IPR006626;IPR000743;IPR012334;noIPR;IPR011050	Parallel beta-helix repeat;Glycoside hydrolase, family 28;Pectin lyase fold;Pectin lyase fold;Pectin lyase fold/virulence factor	GO:0004650;GO:0005975;GO:0016829	polygalacturonase activity;carbohydrate metabolic process;lyase activity
Dis.W6-48549-006.v1.1AG00630.t1	-	94
Dis.W6-48549-006.v1.1AG00631.t1	TVU33309.1hypothetical protein EJB05_25119, partial	277			noIPR;noIPR;noIPR	UDP-glucuronosyl/UDP-glucosyltransferase;UDP-glucuronosyl/UDP-glucosyltransferase;UDP-glucuronosyl/UDP-glucosyltransferase
Dis.W6-48549-006.v1.1AG00632.t1	GJN19497.1hypothetical protein PR202_gb06779	89			IPR008972;IPR003245;IPR039391;IPR003245;IPR008972	Cupredoxin;Phytocyanin domain;Phytocyanin;Phytocyanin domain;Cupredoxin
Dis.W6-48549-006.v1.1AG00633.t1	TVU33308.1hypothetical protein EJB05_25118, partial	292			noIPR;noIPR	Cytochrome P450 superfamily;Cytochrome P450 superfamily	GO:0016020	membrane
Dis.W6-48549-006.v1.1AG00634.t1	XP_008681054.1uncharacterized protein LOC100192599 isoform X1	484			noIPR;IPR036873;noIPR;noIPR;noIPR;noIPR;IPR044240;IPR036873	Cystatin superfamily;Rhodanese-like domain superfamily;Rhodanese-like domain superfamily;Rhodanese-like domain superfamily;Rhodanese-like domain superfamily;Rhodanese-like domain superfamily;Rhodanese-like domain-containing protein STR4-like;Rhodanese-like domain superfamily
Dis.W6-48549-006.v1.1AG00635.t1	XP_004951281.1transcription factor SPEECHLESS	368			noIPR;noIPR;IPR011598;IPR011598;IPR036638;noIPR;noIPR;noIPR;noIPR;IPR044283;IPR011598;noIPR;IPR036638	DNA/RNA polymerase superfamily;DNA/RNA polymerase superfamily;Myc-type, basic helix-loop-helix (bHLH) domain;Myc-type, basic helix-loop-helix (bHLH) domain;Helix-loop-helix DNA-binding domain superfamily;Helix-loop-helix DNA-binding domain superfamily;Helix-loop-helix DNA-binding domain superfamily;Helix-loop-helix DNA-binding domain superfamily;Helix-loop-helix DNA-binding domain superfamily;Tra…	GO:0005634;GO:0010374;GO:0045893	nucleus;stomatal complex development;positive regulation of DNA-templated transcription
Dis.W6-48549-006.v1.1AG00636.t1	RLN09520.1uncharacterized protein C2845_PM11G18840	132
Dis.W6-48549-006.v1.1AG00637.t1	KAG2565650.1hypothetical protein PVAP13_7NG118900	143			noIPR;IPR002674;IPR011331;IPR002674;noIPR;IPR002674;IPR011332	S-adenosyl-L-methionine-dependent methyltransferase superfamily;Ribosomal protein L37ae;Ribosomal protein L37ae/L37e;Ribosomal protein L37ae;Ribosomal protein L37ae;Ribosomal protein L37ae;Zinc-binding ribosomal protein	GO:0003735;GO:0005840;GO:0006412	structural constituent of ribosome;ribosome;translation
Dis.W6-48549-006.v1.1AG00638.t1	TVU33321.1hypothetical protein EJB05_25131	829			noIPR;IPR021480;noIPR;noIPR;noIPR;noIPR;noIPR;noIPR;noIPR;noIPR;noIPR;IPR040244	Alpha/Beta hydrolase fold;Probable zinc-ribbon domain, plant;Probable zinc-ribbon domain, plant;Probable zinc-ribbon domain, plant;Probable zinc-ribbon domain, plant;Probable zinc-ribbon domain, plant;Probable zinc-ribbon domain, plant;Probable zinc-ribbon domain, plant;Probable zinc-ribbon domain, plant;Probable zinc-ribbon domain, plant;Probable zinc-ribbon domain, plant;Protein enhanced diseas…	GO:1900150	regulation of defense response to fungus
Dis.W6-48549-006.v1.1AG00639.t1	-	205			noIPR;noIPR;noIPR	Lipoxigenase, C-terminal domain superfamily;Lipoxigenase, C-terminal domain superfamily;Lipoxigenase, C-terminal domain superfamily
Dis.W6-48549-006.v1.1AG00640.t1	GJN40530.1hypothetical protein PR202_gb29758	88			noIPR;noIPR	Ecd family;Ecd family
Dis.W6-48549-006.v1.1AG00641.t1	-	75			noIPR	Alpha/Beta hydrolase fold
Dis.W6-48549-006.v1.1AG00642.t1	XP_025808755.1hornerin-like	630			noIPR	Ribosome-inactivating protein superfamily
Dis.W6-48549-006.v1.1AG00643.t1	-	94			noIPR;noIPR	P-loop containing nucleoside triphosphate hydrolase;P-loop containing nucleoside triphosphate hydrolase
Dis.W6-48549-006.v1.1AG00644.t1	TVU33319.1hypothetical protein EJB05_25129, partial	213			IPR028909;IPR001787;noIPR;IPR018258;IPR001787;IPR036164	Ribosomal protein L21-like;Ribosomal protein L21;Ribosomal protein L21;Ribosomal protein L21, conserved site;Ribosomal protein L21;L21-like superfamily	GO:0003729;GO:0003735;GO:0005840;GO:0006412;GO:0009507;GO:0009658;GO:0009793;GO:0010027;GO:0019843;GO:1990904	mRNA binding;structural constituent of ribosome;ribosome;translation;chloroplast;chloroplast organization;embryo development ending in seed dormancy;thylakoid membrane organization;rRNA binding;ribonucleoprotein complex
Dis.W6-48549-006.v1.1AG00645.t1	-	68
Dis.W6-48549-006.v1.1AG00646.t1	GJN19509.1hypothetical protein PR202_gb06792	1235			noIPR;noIPR;IPR003103;IPR036533;IPR003103;noIPR;noIPR;noIPR;noIPR;noIPR;noIPR;noIPR;noIPR;noIPR;noIPR;noIPR;noIPR;noIPR;noIPR;noIPR;noIPR;noIPR;IPR040400;IPR003103;IPR000048;IPR036533	Haem peroxidase superfamily;Haem peroxidase superfamily;BAG domain;BAG domain superfamily;BAG domain;BAG domain;BAG domain;BAG domain;BAG domain;BAG domain;BAG domain;BAG domain;BAG domain;BAG domain;BAG domain;BAG domain;BAG domain;BAG domain;BAG domain;BAG domain;BAG domain;BAG domain;BAG family molecular chaperone regulator 5/6/7/8;BAG domain;IQ motif, EF-hand binding site;BAG domain superfami…	GO:0051087	protein-folding chaperone binding
Dis.W6-48549-006.v1.1AG00647.t1	TVU33325.1hypothetical protein EJB05_25135	493			noIPR;noIPR;IPR001810;IPR015915;IPR001810;noIPR;IPR045048;IPR001810;noIPR;IPR036047;IPR011043	Ty3 transposon capsid-like protein;Ty3 transposon capsid-like protein;F-box domain;Kelch-type beta propeller;F-box domain;F-box domain;F-box only protein 31/39;F-box domain;F-box domain;F-box-like domain superfamily;Galactose oxidase/kelch, beta-propeller
Dis.W6-48549-006.v1.1AG00647.t2	TVU33325.1hypothetical protein EJB05_25135	501			noIPR;noIPR;IPR001810;IPR015915;noIPR;IPR001810;IPR045048;IPR001810;noIPR;IPR011043;IPR036047	Cupredoxin;Cupredoxin;F-box domain;Kelch-type beta propeller;Kelch-type beta propeller;F-box domain;F-box only protein 31/39;F-box domain;F-box domain;Galactose oxidase/kelch, beta-propeller;F-box-like domain superfamily
Dis.W6-48549-006.v1.1AG00648.t1	TVU33326.1hypothetical protein EJB05_25136	445			noIPR;noIPR;noIPR;IPR043424;noIPR	Transcription factor, MADS-box superfamily;Transcription factor, MADS-box superfamily;Transcription factor, MADS-box superfamily;Protein BRANCHLESS TRICHOME-like;Protein BRANCHLESS TRICHOME-like
Dis.W6-48549-006.v1.1AG00648.t2	TVU33326.1hypothetical protein EJB05_25136	443			noIPR;noIPR;noIPR;IPR043424;noIPR	Cyclin-dependent protein kinase inhibitor SMR11/SMR16;Cyclin-dependent protein kinase inhibitor SMR11/SMR16;Cyclin-dependent protein kinase inhibitor SMR11/SMR16;Protein BRANCHLESS TRICHOME-like;Protein BRANCHLESS TRICHOME-like
Dis.W6-48549-006.v1.1AG00648.t3	TVU33326.1hypothetical protein EJB05_25136	678			noIPR;noIPR;noIPR;IPR043424;noIPR	CH domain superfamily;CH domain superfamily;CH domain superfamily;Protein BRANCHLESS TRICHOME-like;Protein BRANCHLESS TRICHOME-like
Dis.W6-48549-006.v1.1AG00649.t1	-	103
Dis.W6-48549-006.v1.1AG00650.t1	PWZ56611.1hypothetical protein Zm00014a_018588	75			noIPR;noIPR	von Willebrand factor A-like domain superfamily;von Willebrand factor A-like domain superfamily
Dis.W6-48549-006.v1.1AG00651.t1	NP_001142262.1BTB/POZ domain-containing protein POB1-like isoform 2	536			noIPR;noIPR;noIPR;IPR000210;IPR011705;IPR000210;IPR011333;noIPR;IPR011705;noIPR;IPR045890;IPR000210;noIPR;IPR011333;noIPR	NECAP, PHear domain;NECAP, PHear domain;NECAP, PHear domain;BTB/POZ domain;BTB/Kelch-associated;BTB/POZ domain;SKP1/BTB/POZ domain superfamily;SKP1/BTB/POZ domain superfamily;BTB/Kelch-associated;BTB/Kelch-associated;BTB/POZ domain-containing protein POB1-like;BTB/POZ domain;BTB/POZ domain;SKP1/BTB/POZ domain superfamily;SKP1/BTB/POZ domain superfamily	GO:0005634;GO:0010114	nucleus;response to red light
Dis.W6-48549-006.v1.1AG00651.t2	NP_001142262.1BTB/POZ domain-containing protein POB1-like isoform 2	796			noIPR;noIPR;noIPR;IPR000210;IPR011705;IPR011705;IPR000210;IPR011333;noIPR;noIPR;noIPR;noIPR;IPR045890;IPR000210;noIPR;IPR011333	PADRE domain;PADRE domain;PADRE domain;BTB/POZ domain;BTB/Kelch-associated;BTB/Kelch-associated;BTB/POZ domain;SKP1/BTB/POZ domain superfamily;SKP1/BTB/POZ domain superfamily;SKP1/BTB/POZ domain superfamily;SKP1/BTB/POZ domain superfamily;SKP1/BTB/POZ domain superfamily;BTB/POZ domain-containing protein POB1-like;BTB/POZ domain;BTB/POZ domain;SKP1/BTB/POZ domain superfamily	GO:0005634;GO:0010114	nucleus;response to red light
Dis.W6-48549-006.v1.1AG00651.t3	TVU33349.1hypothetical protein EJB05_25160, partial	339			noIPR;noIPR;noIPR	Band 7/SPFH domain superfamily;Band 7/SPFH domain superfamily;Band 7/SPFH domain superfamily	GO:0016020	membrane
Dis.W6-48549-006.v1.1AG00652.t1	TVU33352.1hypothetical protein EJB05_25164, partial	220			noIPR;noIPR;noIPR;IPR038939	VQ motif-containing protein 8/17/18/20/21/25;VQ motif-containing protein 8/17/18/20/21/25;VQ motif-containing protein 8/17/18/20/21/25;Plastid division protein PDV1/PDV2	GO:0010020	chloroplast fission
Dis.W6-48549-006.v1.1AG00653.t1	GJM90797.1hypothetical protein PR202_ga07110	211			IPR001810;IPR001810;noIPR;noIPR;IPR001810;noIPR;IPR036047	F-box domain;F-box domain;F-box domain;F-box domain;F-box domain;F-box domain;F-box-like domain superfamily
Dis.W6-48549-006.v1.1AG00654.t1	-	118
Dis.W6-48549-006.v1.1AG00655.t1	-	119
Dis.W6-48549-006.v1.1AG00655.t2	GJN01557.1hypothetical protein PR202_ga18832	80
Dis.W6-48549-006.v1.1AG00656.t1	CAB3487694.1unnamed protein product	79			noIPR	Ethylene insensitive 3-like protein, DNA-binding domain superfamily	GO:0000160;GO:0031969;GO:0099402	phosphorelay signal transduction system;chloroplast membrane;plant organ development
Dis.W6-48549-006.v1.1AG00657.t1	TVU33354.1hypothetical protein EJB05_25166, partial	445			IPR002110;IPR002110;IPR036770;noIPR;noIPR;IPR002110;noIPR;IPR002110;IPR036770	Ankyrin repeat;Ankyrin repeat;Ankyrin repeat-containing domain superfamily;Ankyrin repeat-containing domain superfamily;Ankyrin repeat-containing domain superfamily;Ankyrin repeat;Ankyrin repeat;Ankyrin repeat;Ankyrin repeat-containing domain superfamily
Dis.W6-48549-006.v1.1AG00658.t1	TVU33371.1hypothetical protein EJB05_25184, partial	252			IPR026961;noIPR	PGG domain;PGG domain	GO:0016020	membrane
Dis.W6-48549-006.v1.1AG00658.t2	TVU33371.1hypothetical protein EJB05_25184, partial	245			IPR026961;noIPR	PGG domain;PGG domain	GO:0016020	membrane
Dis.W6-48549-006.v1.1AG00659.t1	GJM90798.1hypothetical protein PR202_ga07112	159			IPR002963;IPR007118;IPR007112;IPR009009;IPR036908;IPR002963;IPR007112;noIPR;IPR036908	Expansin;Expansin/Lol pI;Expansin/pollen allergen, DPBB domain;RlpA-like protein, double-psi beta-barrel domain;RlpA-like domain superfamily;Expansin;Expansin/pollen allergen, DPBB domain;Expansin/pollen allergen, DPBB domain;RlpA-like domain superfamily	GO:0005576;GO:0009653;GO:0009664;GO:0016020	extracellular region;anatomical structure morphogenesis;plant-type cell wall organization;membrane
Dis.W6-48549-006.v1.1AG00660.t1	TVU33365.1hypothetical protein EJB05_25177	75			IPR009424;IPR009424	Arabinogalactan protein 16/20/22/41;Arabinogalactan protein 16/20/22/41	GO:0016020	membrane
Dis.W6-48549-006.v1.1AG00661.t1	-	92			noIPR;noIPR	Reverse transcriptase, RNA-dependent DNA polymerase;Reverse transcriptase, RNA-dependent DNA polymerase
Dis.W6-48549-006.v1.1AG00662.t1	TVU33370.1hypothetical protein EJB05_25183, partial	429			noIPR;IPR003657;IPR003657;IPR036576;noIPR;noIPR;noIPR;noIPR;noIPR;IPR044810;IPR003657;IPR036576	K Homology domain, type 1 superfamily;WRKY domain;WRKY domain;WRKY domain superfamily;WRKY domain superfamily;WRKY domain superfamily;WRKY domain superfamily;WRKY domain superfamily;WRKY domain superfamily;WRKY transcription factor, plant;WRKY domain;WRKY domain superfamily	GO:0000976;GO:0003700;GO:0005634;GO:0006355;GO:0050896	transcription cis-regulatory region binding;DNA-binding transcription factor activity;nucleus;regulation of DNA-templated transcription;response to stimulus
Dis.W6-48549-006.v1.1AG00663.t1	XP_004951246.1vacuolar protein sorting-associated protein 29	189			noIPR;IPR029052;IPR000979;IPR024654;IPR000979;IPR028661;IPR029052	DNA/RNA polymerase superfamily;Metallo-dependent phosphatase-like;Phosphodiesterase MJ0936/Vps29;Calcineurin-like phosphoesterase domain, lpxH-type;Phosphodiesterase MJ0936/Vps29;Vacuolar protein sorting-associated protein 29;Metallo-dependent phosphatase-like	GO:0001881;GO:0005771;GO:0005829;GO:0006623;GO:0030904;GO:0042147;GO:2000012	receptor recycling;multivesicular body;cytosol;protein targeting to vacuole;retromer complex;retrograde transport, endosome to Golgi;regulation of auxin polar transport
Dis.W6-48549-006.v1.1AG00664.t1	-	88
Dis.W6-48549-006.v1.1AG00665.t1	-	69
Dis.W6-48549-006.v1.1AG00666.t1	TVU33358.1hypothetical protein EJB05_25170	673			noIPR;noIPR;noIPR;noIPR;noIPR;noIPR;noIPR;noIPR;noIPR;noIPR	Multi antimicrobial extrusion protein DinF-like;Multi antimicrobial extrusion protein DinF-like;Multi antimicrobial extrusion protein DinF-like;Multi antimicrobial extrusion protein DinF-like;Multi antimicrobial extrusion protein DinF-like;Multi antimicrobial extrusion protein DinF-like;Multi antimicrobial extrusion protein DinF-like;Multi antimicrobial extrusion protein DinF-like;Multi antimicro…	GO:0016020	membrane
Dis.W6-48549-006.v1.1AG00667.t1	GJN19522.1hypothetical protein PR202_gb06805	454			IPR003388;IPR004864;noIPR;noIPR;noIPR;IPR003388	Reticulon;Late embryogenesis abundant protein, LEA_2 subgroup;Late embryogenesis abundant protein, LEA_2 subgroup;Late embryogenesis abundant protein, LEA_2 subgroup;Late embryogenesis abundant protein, LEA_2 subgroup;Reticulon	GO:0005789	endoplasmic reticulum membrane
Dis.W6-48549-006.v1.1AG00668.t1	KAG0532670.1hypothetical protein BDA96_04G127100	232			noIPR;IPR003604;noIPR;IPR017340;IPR013085;noIPR;noIPR;noIPR;IPR017340;IPR000690;IPR017340;IPR036236	Equilibrative nucleoside transporter;Matrin/U1-C-like, C2H2-type zinc finger;Matrin/U1-C-like, C2H2-type zinc finger;U1 small nuclear ribonucleoprotein C;U1-C, C2H2-type zinc finger;U1-C, C2H2-type zinc finger;U1-C, C2H2-type zinc finger;U1-C, C2H2-type zinc finger;U1 small nuclear ribonucleoprotein C;Matrin/U1-C, C2H2-type zinc finger;U1 small nuclear ribonucleoprotein C;Zinc finger C2H2 superfa…	GO:0000243;GO:0000387;GO:0000395;GO:0003729;GO:0005685;GO:0008270;GO:0030619;GO:0030627;GO:0071004	commitment complex;spliceosomal snRNP assembly;mRNA 5'-splice site recognition;mRNA binding;U1 snRNP;zinc ion binding;U1 snRNA binding;pre-mRNA 5'-splice site binding;U2-type prespliceosome
Dis.W6-48549-006.v1.1AG00669.t1	GJN19533.1hypothetical protein PR202_gb06816	632			noIPR;IPR011990;IPR002885;IPR002885;IPR002885;IPR002885;IPR011990;IPR011990;noIPR;IPR002885;IPR002885;IPR002885;IPR002885;IPR002885;IPR002885;IPR002885;IPR002885;IPR002885;IPR002885;IPR002885;noIPR;noIPR	NusB-like superfamily;Tetratricopeptide-like helical domain superfamily;Pentatricopeptide repeat;Pentatricopeptide repeat;Pentatricopeptide repeat;Pentatricopeptide repeat;Tetratricopeptide-like helical domain superfamily;Tetratricopeptide-like helical domain superfamily;Tetratricopeptide-like helical domain superfamily;Pentatricopeptide repeat;Pentatricopeptide repeat;Pentatricopeptide repeat;Pe…	GO:0000373;GO:0000963;GO:0003729;GO:0005739;GO:0032981	Group II intron splicing;mitochondrial RNA processing;mRNA binding;mitochondrion;mitochondrial respiratory chain complex I assembly
Dis.W6-48549-006.v1.1AG00670.t1	TVU33390.1hypothetical protein EJB05_25205	572	EC:3.6.1.15	nucleoside-triphosphate phosphatase	IPR000641;noIPR;IPR002110;IPR003593;IPR027417;noIPR;IPR002110;IPR002110;IPR003959;IPR036770;IPR036770;noIPR;IPR002110;IPR002110;noIPR;noIPR;IPR036770;IPR027417	CbxX/CfxQ;CbxX/CfxQ;Ankyrin repeat;AAA+ ATPase domain;P-loop containing nucleoside triphosphate hydrolase;P-loop containing nucleoside triphosphate hydrolase;Ankyrin repeat;Ankyrin repeat;ATPase, AAA-type, core;Ankyrin repeat-containing domain superfamily;Ankyrin repeat-containing domain superfamily;Ankyrin repeat-containing domain superfamily;Ankyrin repeat;Ankyrin repeat;Ankyrin repeat;Ankyrin …	GO:0005524;GO:0016887	ATP binding;ATP hydrolysis activity
Dis.W6-48549-006.v1.1AG00671.t1	-	109
Dis.W6-48549-006.v1.1AG00672.t1	TVU33400.1hypothetical protein EJB05_25215, partial	302	EC:3.4.21	Acting on peptide bonds (peptidases)	IPR000223;noIPR;IPR019533;IPR000223;noIPR;noIPR;noIPR;IPR000223;IPR019758;IPR019756;IPR019533;IPR036286	Peptidase S26A, signal peptidase I;Peptidase S26A, signal peptidase I;Peptidase S26;Peptidase S26A, signal peptidase I;Peptidase S26A, signal peptidase I;Peptidase S26A, signal peptidase I;Peptidase S26A, signal peptidase I;Peptidase S26A, signal peptidase I;Peptidase S26A, signal peptidase I, conserved site;Peptidase S26A, signal peptidase I, serine active site;Peptidase S26;LexA/Signal peptidas…	GO:0004252;GO:0006465;GO:0009535;GO:0010027	serine-type endopeptidase activity;signal peptide processing;chloroplast thylakoid membrane;thylakoid membrane organization
Dis.W6-48549-006.v1.1AG00673.t1	GJN19527.1hypothetical protein PR202_gb06810	213			IPR007118;IPR002963;IPR007112;IPR007117;IPR036749;IPR009009;IPR036908;IPR002963;IPR007112;IPR007117;noIPR;IPR036908;IPR036749	Expansin/Lol pI;Expansin;Expansin/pollen allergen, DPBB domain;Expansin, cellulose-binding-like domain;Expansin, cellulose-binding-like domain superfamily;RlpA-like protein, double-psi beta-barrel domain;RlpA-like domain superfamily;Expansin;Expansin/pollen allergen, DPBB domain;Expansin, cellulose-binding-like domain;Expansin, cellulose-binding-like domain;RlpA-like domain superfamily;Expansin, …	GO:0005576;GO:0009653;GO:0009664;GO:0016020	extracellular region;anatomical structure morphogenesis;plant-type cell wall organization;membrane
Dis.W6-48549-006.v1.1AG00674.t1	TVU33403.1hypothetical protein EJB05_25218, partial	213			IPR002963;IPR007118;IPR007112;IPR036908;IPR007117;IPR009009;IPR036749;IPR002963;IPR007112;IPR007117;noIPR;IPR036749;IPR036908	Expansin;Expansin/Lol pI;Expansin/pollen allergen, DPBB domain;RlpA-like domain superfamily;Expansin, cellulose-binding-like domain;RlpA-like protein, double-psi beta-barrel domain;Expansin, cellulose-binding-like domain superfamily;Expansin;Expansin/pollen allergen, DPBB domain;Expansin, cellulose-binding-like domain;Expansin, cellulose-binding-like domain;Expansin, cellulose-binding-like domain…	GO:0005576;GO:0009653;GO:0009664;GO:0016020	extracellular region;anatomical structure morphogenesis;plant-type cell wall organization;membrane
Dis.W6-48549-006.v1.1AG00675.t1	RLM78963.1protein LIKE COV 1-like	283			IPR007462;noIPR;IPR007462	Protein CONTINUOUS VASCULAR RING 1-like;Protein CONTINUOUS VASCULAR RING 1-like;Protein CONTINUOUS VASCULAR RING 1-like	GO:0016020	membrane
Dis.W6-48549-006.v1.1AG00676.t1	TVU12813.1hypothetical protein EJB05_46474, partial	424			IPR005174;noIPR	Domain unknown function DUF295;Domain unknown function DUF295
Dis.W6-48549-006.v1.1AG00677.t1	XP_039836438.1subtilisin-like protease SBT3.9	739	EC:3.4.21	Acting on peptide bonds (peptidases)	IPR015500;noIPR;noIPR;noIPR;IPR000209;noIPR;noIPR;IPR037045;IPR036852;IPR010259;IPR041469;noIPR;IPR045051;IPR023828;IPR022398;noIPR;noIPR;IPR034197;IPR036852	Peptidase S8, subtilisin-related;Peptidase S8, subtilisin-related;Peptidase S8, subtilisin-related;Peptidase S8, subtilisin-related;Peptidase S8/S53 domain;Peptidase S8/S53 domain;Peptidase S8/S53 domain;Peptidase S8 propeptide/proteinase inhibitor I9 superfamily;Peptidase S8/S53 domain superfamily;Peptidase S8 propeptide/proteinase inhibitor I9;Subtilisin-like protease, fibronectin type-III doma…	GO:0004252;GO:0006508	serine-type endopeptidase activity;proteolysis
Dis.W6-48549-006.v1.1AG00678.t1	XP_039789029.1dynein light chain LC6, flagellar outer arm-like	94			noIPR;IPR001372;IPR001372;IPR037177;IPR001372;IPR037177	Leucine-rich repeat domain superfamily;Dynein light chain, type 1/2;Dynein light chain, type 1/2;Dynein light chain superfamily;Dynein light chain, type 1/2;Dynein light chain superfamily	GO:0005737;GO:0005868;GO:0005874;GO:0007017;GO:0016020;GO:0045505	cytoplasm;cytoplasmic dynein complex;microtubule;microtubule-based process;membrane;dynein intermediate chain binding
Dis.W6-48549-006.v1.1AG00679.t1	XP_004952183.1transcription factor MYB3R-4	431			IPR001005;noIPR;noIPR;IPR001005;noIPR;IPR001005;IPR017930;IPR001005;IPR017930;IPR001005;IPR001005;IPR009057	SANT/Myb domain;SANT/Myb domain;SANT/Myb domain;SANT/Myb domain;SANT/Myb domain;SANT/Myb domain;Myb domain;SANT/Myb domain;Myb domain;SANT/Myb domain;SANT/Myb domain;Homeobox-like domain superfamily
Dis.W6-48549-006.v1.1AG00679.t2	XP_004952183.1transcription factor MYB3R-4	405			IPR001005;noIPR;noIPR;IPR001005;noIPR;IPR001005;IPR017930;IPR001005;IPR017930;IPR001005;IPR001005;IPR009057	SANT/Myb domain;SANT/Myb domain;SANT/Myb domain;SANT/Myb domain;SANT/Myb domain;SANT/Myb domain;Myb domain;SANT/Myb domain;Myb domain;SANT/Myb domain;SANT/Myb domain;Homeobox-like domain superfamily
Dis.W6-48549-006.v1.1AG00680.t1	TVU32613.1hypothetical protein EJB05_24351	517			noIPR;noIPR;noIPR;noIPR;noIPR;IPR005512;noIPR;noIPR;IPR038937;IPR005512	RWP-RK domain;RWP-RK domain;RWP-RK domain;RWP-RK domain;RWP-RK domain;PRONE domain;PRONE domain;PRONE domain;Rop guanine nucleotide exchange factor;PRONE domain	GO:0005085;GO:0005886	guanyl-nucleotide exchange factor activity;plasma membrane
Dis.W6-48549-006.v1.1AG00681.t1	GJN19543.1hypothetical protein PR202_gb06830	302			noIPR;noIPR	Aspartic peptidase domain superfamily;Aspartic peptidase domain superfamily	GO:0016020	membrane
Dis.W6-48549-006.v1.1AG00682.t1	XP_039789038.1gamma-secretase subunit APH1-like	334			IPR009294;noIPR;IPR009294	Gamma-secretase subunit Aph-1;Gamma-secretase subunit Aph-1;Gamma-secretase subunit Aph-1	GO:0005783;GO:0016485;GO:0030674;GO:0070765	endoplasmic reticulum;protein processing;protein-macromolecule adaptor activity;gamma-secretase complex
Dis.W6-48549-006.v1.1AG00683.t1	GJM90831.1hypothetical protein PR202_ga07149	227			IPR001810;noIPR;IPR001810;noIPR;noIPR;IPR036047	F-box domain;F-box domain;F-box domain;F-box domain;F-box domain;F-box-like domain superfamily
Dis.W6-48549-006.v1.1AG00684.t1	TVU32612.1hypothetical protein EJB05_24350, partial	372			IPR001810;noIPR;IPR001810;noIPR;IPR001810;IPR036047;noIPR	F-box domain;F-box domain;F-box domain;F-box domain;F-box domain;F-box-like domain superfamily;F-box-like domain superfamily
Dis.W6-48549-006.v1.1AG00684.t2	TVU32612.1hypothetical protein EJB05_24350, partial	93			IPR001810;noIPR;IPR001810;IPR001810;IPR036047	F-box domain;F-box domain;F-box domain;F-box domain;F-box-like domain superfamily
Dis.W6-48549-006.v1.1AG00685.t1	GJM90842.1hypothetical protein PR202_ga07160	481			IPR017451;IPR013187;noIPR;IPR001810;noIPR;noIPR;noIPR;IPR036047	F-box associated interaction domain;F-box associated domain, type 3;F-box associated domain, type 3;F-box domain;F-box domain;F-box domain;F-box domain;F-box-like domain superfamily
Dis.W6-48549-006.v1.1AG00686.t1	GJN19549.1hypothetical protein PR202_gb06836	164			IPR001810;IPR001810;noIPR;noIPR;IPR001810;IPR036047	F-box domain;F-box domain;F-box domain;F-box domain;F-box domain;F-box-like domain superfamily
Dis.W6-48549-006.v1.1AG00687.t1	GJM90842.1hypothetical protein PR202_ga07160	171			IPR013187	F-box associated domain, type 3
Dis.W6-48549-006.v1.1AG00688.t1	GJM90845.1hypothetical protein PR202_ga07164	591			noIPR;IPR002014;IPR038425;IPR008942;IPR004152;IPR002014;noIPR;noIPR;noIPR;IPR044836;IPR004152;IPR002014;noIPR;noIPR;noIPR;IPR008942	Alpha/beta knot methyltransferases;VHS domain;GAT domain superfamily;ENTH/VHS;GAT domain;VHS domain;VHS domain;VHS domain;VHS domain;TOM1-like protein, plant;GAT domain;VHS domain;VHS domain;VHS domain;VHS domain;ENTH/VHS	GO:0005488;GO:0015031	binding;protein transport
Dis.W6-48549-006.v1.1AG00689.t1	TVU32607.1hypothetical protein EJB05_24345	105			noIPR;IPR040299	Aspartic peptidase domain superfamily;Protein FERTILITY RESTORER RF2-like	GO:0009507;GO:0009658;GO:0010027	chloroplast;chloroplast organization;thylakoid membrane organization
Dis.W6-48549-006.v1.1AG00690.t1	VAI55534.1unnamed protein product	137	EC:4.2.1.74;EC:1.1.1.35;EC:5.3.3.8;EC:4.2.1.17;EC:5.1.2.3	medium-chain-enoyl-CoA hydratase;3-hydroxyacyl-CoA dehydrogenase;Delta(3)-Delta(2)-enoyl-CoA isomerase;enoyl-CoA hydratase;3-hydroxybutyryl-CoA epimerase	noIPR;IPR001753;noIPR;IPR018376;noIPR;IPR029045	Heavy metal-associated isoprenylated plant protein 47;Enoyl-CoA hydratase/isomerase;Enoyl-CoA hydratase/isomerase;Enoyl-CoA hydratase/isomerase, conserved site;Enoyl-CoA hydratase/isomerase, conserved site;ClpP/crotonase-like domain superfamily	GO:0003729;GO:0003857;GO:0004165;GO:0005777;GO:0006635;GO:0008017;GO:0008692;GO:0018812;GO:0070403	mRNA binding;3-hydroxyacyl-CoA dehydrogenase activity;delta(3)-delta(2)-enoyl-CoA isomerase activity;peroxisome;fatty acid beta-oxidation;microtubule binding;3-hydroxybutyryl-CoA epimerase activity;3-hydroxyacyl-CoA dehydratase activity;NAD+ binding
Dis.W6-48549-006.v1.1AG00691.t1	-	100			noIPR;noIPR	Ribonuclease H-like superfamily;Ribonuclease H-like superfamily
Dis.W6-48549-006.v1.1AG00692.t1	VAH56913.1unnamed protein product	391	EC:4.2.1.74;EC:1.1.1.35;EC:5.3.3.8;EC:4.2.1.17;EC:5.1.2.3	medium-chain-enoyl-CoA hydratase;3-hydroxyacyl-CoA dehydrogenase;Delta(3)-Delta(2)-enoyl-CoA isomerase;enoyl-CoA hydratase;3-hydroxybutyryl-CoA epimerase	noIPR;noIPR;noIPR;noIPR;IPR006108;IPR006176;noIPR;noIPR;IPR006180;IPR036291;IPR008927;IPR008927	PAM68-like;PAM68-like;PAM68-like;PAM68-like;3-hydroxyacyl-CoA dehydrogenase, C-terminal;3-hydroxyacyl-CoA dehydrogenase, NAD binding;3-hydroxyacyl-CoA dehydrogenase, NAD binding;3-hydroxyacyl-CoA dehydrogenase, NAD binding;3-hydroxyacyl-CoA dehydrogenase, conserved site;NAD(P)-binding domain superfamily;6-phosphogluconate dehydrogenase-like, C-terminal domain superfamily;6-phosphogluconate dehydr…	GO:0003729;GO:0003857;GO:0004165;GO:0005777;GO:0005874;GO:0006635;GO:0008017;GO:0008692;GO:0018812;GO:0070403	mRNA binding;3-hydroxyacyl-CoA dehydrogenase activity;delta(3)-delta(2)-enoyl-CoA isomerase activity;peroxisome;microtubule;fatty acid beta-oxidation;microtubule binding;3-hydroxybutyryl-CoA epimerase activity;3-hydroxyacyl-CoA dehydratase activity;NAD+ binding
Dis.W6-48549-006.v1.1AG00693.t1	-	76
Dis.W6-48549-006.v1.1AG00694.t1	PUZ74929.1hypothetical protein GQ55_1G106200	401			IPR033467;IPR005172;noIPR;noIPR;noIPR;IPR028307;IPR005172	Tesmin/TSO1-like CXC domain;CRC domain;CRC domain;CRC domain;CRC domain;Lin-54 family;CRC domain
Dis.W6-48549-006.v1.1AG00695.t1	KAJ1278955.1hypothetical protein BS78_04G117900	210			IPR021467;IPR021467	Protein of unknown function DUF3119;Protein of unknown function DUF3119	GO:0016020	membrane
Dis.W6-48549-006.v1.1AG00696.t1	-	96			noIPR;noIPR	Casparian strip membrane protein domain;Casparian strip membrane protein domain
Dis.W6-48549-006.v1.1AG00697.t1	TVU32596.1hypothetical protein EJB05_24333, partial	465			IPR003663;IPR003663;IPR036259;IPR005828;IPR045263;IPR005829;IPR020846;noIPR;IPR036259	Sugar/inositol transporter;Sugar/inositol transporter;MFS transporter superfamily;Major facilitator, sugar transporter-like;Glucose transporter GLUT;Sugar transporter, conserved site;Major facilitator superfamily domain;Major facilitator superfamily domain;MFS transporter superfamily	GO:0008645;GO:0015149;GO:0015293;GO:0016020	hexose transmembrane transport;hexose transmembrane transporter activity;symporter activity;membrane
Dis.W6-48549-006.v1.1AG00698.t1	TVU32583.1hypothetical protein EJB05_24319, partial	588	EC:2.4.1.69	type 1 galactoside alpha-(1,2)-fucosyltransferase	noIPR;noIPR;IPR004938;noIPR;IPR004938	Pleckstrin homology domain;Pleckstrin homology domain;Xyloglucan fucosyltransferase;Xyloglucan fucosyltransferase;Xyloglucan fucosyltransferase	GO:0008107;GO:0009969;GO:0032580;GO:0042546;GO:0071555	galactoside 2-alpha-L-fucosyltransferase activity;xyloglucan biosynthetic process;Golgi cisterna membrane;cell wall biogenesis;cell wall organization
Dis.W6-48549-006.v1.1AG00698.t2	TVU32583.1hypothetical protein EJB05_24319, partial	507	EC:2.4.1.69	type 1 galactoside alpha-(1,2)-fucosyltransferase	noIPR;noIPR;IPR004938;noIPR;IPR004938	Phospholipid/glycerol acyltransferase;Phospholipid/glycerol acyltransferase;Xyloglucan fucosyltransferase;Xyloglucan fucosyltransferase;Xyloglucan fucosyltransferase	GO:0008107;GO:0009969;GO:0032580;GO:0042546;GO:0071555	galactoside 2-alpha-L-fucosyltransferase activity;xyloglucan biosynthetic process;Golgi cisterna membrane;cell wall biogenesis;cell wall organization
Dis.W6-48549-006.v1.1AG00699.t1	TKW21013.1hypothetical protein SEVIR_4G189601v2	97	EC:2.7.11.1	non-specific serine/threonine protein kinase	IPR011009	Protein kinase-like domain superfamily	GO:0004674;GO:0005524;GO:0016310	protein serine/threonine kinase activity;ATP binding;phosphorylation
Dis.W6-48549-006.v1.1AG00700.t1	XP_047046196.1protein ROS1A-like	80
Dis.W6-48549-006.v1.1AG00701.t1	-	157			noIPR	Mediator complex, subunit Med7/Med21-like
Dis.W6-48549-006.v1.1AG00702.t1	-	110
Dis.W6-48549-006.v1.1AG00702.t2	TVU33651.1hypothetical protein EJB05_25481	937			noIPR;noIPR;noIPR;noIPR;IPR001320;IPR001320;IPR001638;noIPR;noIPR;noIPR;IPR017103;IPR001828;noIPR;noIPR;IPR015683;noIPR;IPR044440;IPR028082;noIPR	Trichome birefringence-like family;Trichome birefringence-like family;Trichome birefringence-like family;Trichome birefringence-like family;Ionotropic glutamate receptor, C-terminal;Ionotropic glutamate receptor, C-terminal;Solute-binding protein family 3/N-terminal domain of MltF;Solute-binding protein family 3/N-terminal domain of MltF;Solute-binding protein family 3/N-terminal domain of MltF;S…	GO:0005886;GO:0015276;GO:0034220;GO:0038023	plasma membrane;ligand-gated monoatomic ion channel activity;monoatomic ion transmembrane transport;signaling receptor activity
Dis.W6-48549-006.v1.1AG00702.t3	TVU33651.1hypothetical protein EJB05_25481	1022			noIPR;noIPR;noIPR;noIPR;IPR001320;noIPR;IPR001638;IPR001828;noIPR;noIPR;noIPR;IPR017103;IPR001320;noIPR;IPR015683;IPR044440;noIPR;IPR028082;noIPR	Ribonuclease H-like superfamily;Ribonuclease H-like superfamily;Ribonuclease H-like superfamily;Ribonuclease H-like superfamily;Ionotropic glutamate receptor, C-terminal;Ionotropic glutamate receptor, C-terminal;Solute-binding protein family 3/N-terminal domain of MltF;Receptor, ligand binding region;Receptor, ligand binding region;Receptor, ligand binding region;Receptor, ligand binding region;I…	GO:0005886;GO:0015276;GO:0034220;GO:0038023	plasma membrane;ligand-gated monoatomic ion channel activity;monoatomic ion transmembrane transport;signaling receptor activity
Dis.W6-48549-006.v1.1AG00703.t1	TVU32586.1hypothetical protein EJB05_24323, partial	184			IPR036380;IPR000868;noIPR;noIPR;IPR036380	Isochorismatase-like superfamily;Isochorismatase-like;Isochorismatase-like;Isochorismatase-like;Isochorismatase-like superfamily
Dis.W6-48549-006.v1.1AG00704.t1	KAJ1278972.1hypothetical protein BS78_04G119100	366			IPR036638;noIPR;noIPR;noIPR;noIPR;noIPR;IPR011598;IPR045239;IPR036638	Helix-loop-helix DNA-binding domain superfamily;Helix-loop-helix DNA-binding domain superfamily;Helix-loop-helix DNA-binding domain superfamily;Helix-loop-helix DNA-binding domain superfamily;Helix-loop-helix DNA-binding domain superfamily;Helix-loop-helix DNA-binding domain superfamily;Myc-type, basic helix-loop-helix (bHLH) domain;Transcription factor bHLH95-like, basic helix-loop-helix domain;…	GO:0000978;GO:0000981;GO:0005634;GO:0006357	RNA polymerase II cis-regulatory region sequence-specific DNA binding;DNA-binding transcription factor activity, RNA polymerase II-specific;nucleus;regulation of transcription by RNA polymerase II
Dis.W6-48549-006.v1.1AG00705.t1	KAG2650178.1hypothetical protein PVAP13_1NG203557	520			noIPR;noIPR;noIPR;noIPR;noIPR	Alpha/Beta hydrolase fold;Alpha/Beta hydrolase fold;Alpha/Beta hydrolase fold;Alpha/Beta hydrolase fold;Alpha/Beta hydrolase fold
Dis.W6-48549-006.v1.1AG00706.t1	TVU32564.1hypothetical protein EJB05_24297	431			noIPR;noIPR;noIPR;IPR009730;noIPR;noIPR;noIPR;noIPR;noIPR;IPR033194	EF-hand domain pair;EF-hand domain pair;EF-hand domain pair;Micro-fibrillar-associated protein 1, C-terminal;Micro-fibrillar-associated protein 1, C-terminal;Micro-fibrillar-associated protein 1, C-terminal;Micro-fibrillar-associated protein 1, C-terminal;Micro-fibrillar-associated protein 1, C-terminal;Micro-fibrillar-associated protein 1, C-terminal;Microfibrillar-associated protein 1	GO:0000398;GO:0005684	mRNA splicing, via spliceosome;U2-type spliceosomal complex
Dis.W6-48549-006.v1.1AG00707.t1	-	93			noIPR	Ku, C-terminal domain superfamily
Dis.W6-48549-006.v1.1AG00708.t1	ABA94337.1retrotransposon protein, putative, Ty1-copia subclass	137			noIPR;noIPR	HSP20-like chaperone;HSP20-like chaperone	GO:0005488;GO:0006886	binding;intracellular protein transport
Dis.W6-48549-006.v1.1AG00709.t1	GJM90874.1hypothetical protein PR202_ga07195	288	EC:2.4.1.207;EC:3.2.1	xyloglucan:xyloglucosyl transferase;Glycosylases	noIPR;IPR000757;IPR010713;IPR016455;noIPR;noIPR;IPR044791;IPR008263;IPR000757;IPR013320	Uncharacterized protein At1g65710-like;Glycoside hydrolase family 16;Xyloglucan endo-transglycosylase, C-terminal;Xyloglucan endotransglucosylase/hydrolase;Xyloglucan endotransglucosylase/hydrolase;Xyloglucan endotransglucosylase/hydrolase;Beta-glucanase/XTH;Glycoside hydrolase, family 16, active site;Glycoside hydrolase family 16;Concanavalin A-like lectin/glucanase domain superfamily	GO:0004553;GO:0010411;GO:0016762;GO:0042546;GO:0048046;GO:0071555	hydrolase activity, hydrolyzing O-glycosyl compounds;xyloglucan metabolic process;xyloglucan:xyloglucosyl transferase activity;cell wall biogenesis;apoplast;cell wall organization
Dis.W6-48549-006.v1.1AG00710.t1	GJM90875.1hypothetical protein PR202_ga07196	514	EC:2.7.11.1	non-specific serine/threonine protein kinase	noIPR;IPR000719;IPR000719;noIPR;noIPR;noIPR;noIPR;noIPR;noIPR;noIPR;noIPR;noIPR;noIPR;noIPR;noIPR;noIPR;noIPR;noIPR;noIPR;noIPR;noIPR;noIPR;noIPR;noIPR;noIPR;noIPR;noIPR;noIPR;noIPR;noIPR;noIPR;noIPR;noIPR;noIPR;noIPR;noIPR;noIPR;noIPR;noIPR;noIPR;noIPR;noIPR;noIPR;noIPR;noIPR;noIPR;noIPR;noIPR;noIPR;noIPR;IPR017441;IPR008271;IPR000719;IPR011009	Valyl/Leucyl/Isoleucyl-tRNA synthetase, editing domain;Protein kinase domain;Protein kinase domain;Protein kinase domain;Protein kinase domain;Protein kinase domain;Protein kinase domain;Protein kinase domain;Protein kinase domain;Protein kinase domain;Protein kinase domain;Protein kinase domain;Protein kinase domain;Protein kinase domain;Protein kinase domain;Protein kinase domain;Protein kinase…	GO:0004674;GO:0005524;GO:0005634;GO:0006897;GO:0007165;GO:0016310	protein serine/threonine kinase activity;ATP binding;nucleus;endocytosis;signal transduction;phosphorylation
Dis.W6-48549-006.v1.1AG00710.t2	-	97
Dis.W6-48549-006.v1.1AG00711.t1	TVU32510.1hypothetical protein EJB05_24241, partial	343	EC:4.4.1.5	lactoylglutathione lyase	noIPR;noIPR;IPR004360;IPR004361;IPR029068;IPR029068;noIPR;IPR018146;IPR037523;IPR037523;noIPR;IPR029068;IPR029068	Protein kinase-like domain superfamily;Protein kinase-like domain superfamily;Glyoxalase/fosfomycin resistance/dioxygenase domain;Glyoxalase I;Glyoxalase/Bleomycin resistance protein/Dihydroxybiphenyl dioxygenase;Glyoxalase/Bleomycin resistance protein/Dihydroxybiphenyl dioxygenase;Glyoxalase/Bleomycin resistance protein/Dihydroxybiphenyl dioxygenase;Glyoxalase I, conserved site;Vicinal oxygen ch…	GO:0004462;GO:0005737;GO:0019243;GO:0046872	lactoylglutathione lyase activity;cytoplasm;methylglyoxal catabolic process to D-lactate via S-lactoyl-glutathione;metal ion binding
Dis.W6-48549-006.v1.1AG00712.t1	-	91			noIPR	HSP20-like chaperone
Dis.W6-48549-006.v1.1AG00713.t1	TVU32555.1hypothetical protein EJB05_24288, partial	606			noIPR;IPR027417;IPR042197;IPR041118;IPR002182;IPR036388;noIPR;IPR044974;IPR027417	Glycosyl transferase, family 1;P-loop containing nucleoside triphosphate hydrolase;Apoptotic protease-activating factors, helical domain;Rx, N-terminal;NB-ARC;Winged helix-like DNA-binding domain superfamily;Winged helix-like DNA-binding domain superfamily;Disease resistance protein, plants;P-loop containing nucleoside triphosphate hydrolase	GO:0006952;GO:0043531;GO:0051707	defense response;ADP binding;response to other organism
Dis.W6-48549-006.v1.1AG00714.t1	GJN07117.1hypothetical protein PR202_ga24915	87			noIPR;noIPR	Ureide permease, plant;Ureide permease, plant
Dis.W6-48549-006.v1.1AG00715.t1	-	103
Dis.W6-48549-006.v1.1AG00716.t1	TVU32555.1hypothetical protein EJB05_24288, partial	623			noIPR;IPR027417;IPR002182;IPR041118;IPR036388;noIPR;IPR042197;IPR044974;IPR027417	Formyl transferase-like, C-terminal domain superfamily;P-loop containing nucleoside triphosphate hydrolase;NB-ARC;Rx, N-terminal;Winged helix-like DNA-binding domain superfamily;Winged helix-like DNA-binding domain superfamily;Apoptotic protease-activating factors, helical domain;Disease resistance protein, plants;P-loop containing nucleoside triphosphate hydrolase	GO:0006952;GO:0043531;GO:0051707	defense response;ADP binding;response to other organism
Dis.W6-48549-006.v1.1AG00716.t2	TVU32555.1hypothetical protein EJB05_24288, partial	405			noIPR;IPR041118;IPR027417;IPR002182;noIPR;IPR044974;IPR027417	Cytochrome P450 superfamily;Rx, N-terminal;P-loop containing nucleoside triphosphate hydrolase;NB-ARC;NB-ARC;Disease resistance protein, plants;P-loop containing nucleoside triphosphate hydrolase	GO:0006952;GO:0043531;GO:0051707	defense response;ADP binding;response to other organism
Dis.W6-48549-006.v1.1AG00717.t1	TVU32499.1hypothetical protein EJB05_24230, partial	142			noIPR;noIPR;noIPR;noIPR	PSP, proline-rich;PSP, proline-rich;PSP, proline-rich;PSP, proline-rich	GO:0005762	mitochondrial large ribosomal subunit
Dis.W6-48549-006.v1.1AG00718.t1	TVU32553.1hypothetical protein EJB05_24284	607	EC:2.7.11.1	non-specific serine/threonine protein kinase	noIPR;noIPR;noIPR;IPR000719;IPR032675;IPR013210;IPR001611;noIPR;IPR000719;noIPR;noIPR;noIPR;noIPR;noIPR;noIPR;noIPR;noIPR;noIPR;noIPR;noIPR;noIPR;noIPR;noIPR;noIPR;noIPR;noIPR;noIPR;noIPR;noIPR;noIPR;noIPR;noIPR;noIPR;noIPR;noIPR;noIPR;noIPR;noIPR;noIPR;noIPR;noIPR;noIPR;noIPR;noIPR;noIPR;noIPR;noIPR;noIPR;noIPR;noIPR;noIPR;noIPR;noIPR;noIPR;noIPR;noIPR;noIPR;noIPR;noIPR;noIPR;noIPR;noIPR;noIPR;n…	50S ribosomal protein L30e-like;50S ribosomal protein L30e-like;50S ribosomal protein L30e-like;Protein kinase domain;Leucine-rich repeat domain superfamily;Leucine-rich repeat-containing N-terminal, plant-type;Leucine-rich repeat;Leucine-rich repeat;Protein kinase domain;Protein kinase domain;Protein kinase domain;Protein kinase domain;Protein kinase domain;Protein kinase domain;Protein kinase d…	GO:0004674;GO:0005524;GO:0005886;GO:0009742;GO:0016310;GO:0106310	protein serine/threonine kinase activity;ATP binding;plasma membrane;brassinosteroid mediated signaling pathway;phosphorylation;protein serine kinase activity
Dis.W6-48549-006.v1.1AG00718.t2	TVU32553.1hypothetical protein EJB05_24284	616	EC:2.7.11.1	non-specific serine/threonine protein kinase	noIPR;noIPR;noIPR;IPR000719;IPR013210;noIPR;IPR001611;noIPR;IPR032675;IPR000719;noIPR;noIPR;noIPR;noIPR;noIPR;noIPR;noIPR;noIPR;noIPR;noIPR;noIPR;noIPR;noIPR;noIPR;noIPR;noIPR;noIPR;noIPR;noIPR;noIPR;noIPR;noIPR;noIPR;noIPR;noIPR;noIPR;noIPR;noIPR;noIPR;noIPR;noIPR;noIPR;noIPR;noIPR;noIPR;noIPR;noIPR;noIPR;noIPR;noIPR;noIPR;noIPR;noIPR;noIPR;noIPR;noIPR;noIPR;noIPR;noIPR;noIPR;noIPR;noIPR;noIPR;n…	Peptidase S1, PA clan;Peptidase S1, PA clan;Peptidase S1, PA clan;Protein kinase domain;Leucine-rich repeat-containing N-terminal, plant-type;Leucine-rich repeat-containing N-terminal, plant-type;Leucine-rich repeat;Leucine-rich repeat;Leucine-rich repeat domain superfamily;Protein kinase domain;Protein kinase domain;Protein kinase domain;Protein kinase domain;Protein kinase domain;Protein kinase…	GO:0004674;GO:0005524;GO:0005886;GO:0009742;GO:0016310;GO:0106310	protein serine/threonine kinase activity;ATP binding;plasma membrane;brassinosteroid mediated signaling pathway;phosphorylation;protein serine kinase activity
Dis.W6-48549-006.v1.1AG00719.t1	XP_039787562.13-ketoacyl-CoA synthase 4-like	512	EC:2.3.1	Acyltransferases	IPR012392;IPR013747;IPR013601;IPR016039;noIPR;IPR012392;IPR016039;IPR016039	Very-long-chain 3-ketoacyl-CoA synthase;Beta-ketoacyl-[acyl-carrier-protein] synthase III, C-terminal;FAE1/Type III polyketide synthase-like protein;Thiolase-like;Thiolase-like;Very-long-chain 3-ketoacyl-CoA synthase;Thiolase-like;Thiolase-like	GO:0006633;GO:0016020;GO:0016747	fatty acid biosynthetic process;membrane;acyltransferase activity, transferring groups other than amino-acyl groups
Dis.W6-48549-006.v1.1AG00719.t2	KAF8668024.1hypothetical protein HU200_052471	164	EC:2.3.1	Acyltransferases	IPR016039;IPR013747;IPR012392;IPR016039	Thiolase-like;Beta-ketoacyl-[acyl-carrier-protein] synthase III, C-terminal;Very-long-chain 3-ketoacyl-CoA synthase;Thiolase-like	GO:0016747	acyltransferase activity, transferring groups other than amino-acyl groups
Dis.W6-48549-006.v1.1AG00719.t3	KAF8668024.1hypothetical protein HU200_052471	308	EC:2.3.1	Acyltransferases	IPR013747;IPR016039;IPR013601;noIPR;IPR012392;IPR016039;IPR016039	Beta-ketoacyl-[acyl-carrier-protein] synthase III, C-terminal;Thiolase-like;FAE1/Type III polyketide synthase-like protein;FAE1/Type III polyketide synthase-like protein;Very-long-chain 3-ketoacyl-CoA synthase;Thiolase-like;Thiolase-like	GO:0006633;GO:0016020;GO:0016747	fatty acid biosynthetic process;membrane;acyltransferase activity, transferring groups other than amino-acyl groups
Dis.W6-48549-006.v1.1AG00720.t1	KAF0889532.1hypothetical protein E2562_026946	433	EC:4.1.1.48;EC:5.3.1.24	indole-3-glycerol-phosphate synthase;phosphoribosylanthranilate isomerase	noIPR;IPR013785;IPR013798;noIPR;noIPR;IPR045186;IPR013798;IPR011060	Coiled-coil domain-containing protein SCD2-like;Aldolase-type TIM barrel;Indole-3-glycerol phosphate synthase domain;Indole-3-glycerol phosphate synthase domain;Indole-3-glycerol phosphate synthase domain;Indole-3-glycerol phosphate synthase;Indole-3-glycerol phosphate synthase domain;Ribulose-phosphate binding barrel	GO:0000162;GO:0004425;GO:0004640	tryptophan biosynthetic process;indole-3-glycerol-phosphate synthase activity;phosphoribosylanthranilate isomerase activity
Dis.W6-48549-006.v1.1AG00721.t1	KAJ1282730.1hypothetical protein BS78_03G073800	171			noIPR;IPR005824;IPR038655;IPR005824;IPR001141;noIPR;IPR001141;IPR018262;IPR041991;IPR008991	Domain of unknown function DUF1664;KOW;Ribosomal protein L27e superfamily;KOW;Ribosomal protein L27e;Ribosomal protein L27e;Ribosomal protein L27e;Ribosomal protein L27e, conserved site;Eukaryotic Ribosomal Protein L27, KOW domain;Translation protein SH3-like domain superfamily	GO:0003735;GO:0006412;GO:0022625	structural constituent of ribosome;translation;cytosolic large ribosomal subunit
Dis.W6-48549-006.v1.1AG00722.t1	XP_034572284.1uncharacterized protein LOC117836873	639			noIPR;noIPR;noIPR;noIPR	NAD(P)-binding domain superfamily;NAD(P)-binding domain superfamily;NAD(P)-binding domain superfamily;NAD(P)-binding domain superfamily
Dis.W6-48549-006.v1.1AG00723.t1	TVU28315.1hypothetical protein EJB05_19829, partial	212	EC:2.1.1	Transferring one-carbon groups	noIPR	Nucleolus and neural progenitor protein-like, N-terminal domain	GO:0000470;GO:0003676;GO:0005730;GO:0009383;GO:0070475	maturation of LSU-rRNA;nucleic acid binding;nucleolus;rRNA (cytosine-C5-)-methyltransferase activity;rRNA base methylation
Dis.W6-48549-006.v1.1AG00724.t1	TVU32539.1hypothetical protein EJB05_24270, partial	511	EC:2.7.11.1	non-specific serine/threonine protein kinase	noIPR;noIPR;noIPR;IPR000719;noIPR;IPR000719;noIPR;noIPR;noIPR;noIPR;noIPR;noIPR;noIPR;noIPR;noIPR;noIPR;noIPR;noIPR;noIPR;noIPR;noIPR;noIPR;noIPR;noIPR;noIPR;noIPR;noIPR;noIPR;noIPR;noIPR;noIPR;noIPR;noIPR;noIPR;noIPR;noIPR;noIPR;noIPR;noIPR;noIPR;noIPR;noIPR;noIPR;noIPR;noIPR;noIPR;noIPR;noIPR;noIPR;noIPR;noIPR;noIPR;noIPR;noIPR;noIPR;noIPR;noIPR;noIPR;noIPR;noIPR;noIPR;noIPR;noIPR;noIPR;noIPR;n…	Quinoprotein alcohol dehydrogenase-like superfamily;Quinoprotein alcohol dehydrogenase-like superfamily;Quinoprotein alcohol dehydrogenase-like superfamily;Protein kinase domain;Protein kinase domain;Protein kinase domain;Protein kinase domain;Protein kinase domain;Protein kinase domain;Protein kinase domain;Protein kinase domain;Protein kinase domain;Protein kinase domain;Protein kinase domain;P…	GO:0004674;GO:0005524;GO:0005634;GO:0005737;GO:0005886;GO:0016310	protein serine/threonine kinase activity;ATP binding;nucleus;cytoplasm;plasma membrane;phosphorylation
Dis.W6-48549-006.v1.1AG00725.t1	TVU32490.1hypothetical protein EJB05_24221, partial	725	EC:1.1.3.37;EC:1.1.3.8	D-arabinono-1,4-lactone oxidase;L-gulonolactone oxidase	noIPR;noIPR;IPR010030;IPR007173;IPR016169;IPR006094;IPR016171;noIPR;noIPR;IPR016166;IPR036318	Translation protein, beta-barrel domain superfamily;Translation protein, beta-barrel domain superfamily;L-gulonolactone oxidase, plant;D-arabinono-1,4-lactone oxidase, C-terminal domain;FAD-binding, type PCMH, subdomain 2;FAD linked oxidase, N-terminal;Vanillyl-alcohol oxidase, C-terminal subdomain 2;Vanillyl-alcohol oxidase, C-terminal subdomain 2;Vanillyl-alcohol oxidase, C-terminal subdomain 2…	GO:0003885;GO:0016020;GO:0019853;GO:0050105;GO:0071949	D-arabinono-1,4-lactone oxidase activity;membrane;L-ascorbic acid biosynthetic process;L-gulonolactone oxidase activity;FAD binding
Dis.W6-48549-006.v1.1AG00726.t1	TVU32481.1hypothetical protein EJB05_24212, partial	765	EC:3.6.1.15	nucleoside-triphosphate phosphatase	IPR000795;noIPR;noIPR;noIPR;noIPR;noIPR;IPR000640;noIPR;IPR027417;noIPR;IPR005225;IPR000795;IPR004161;noIPR;IPR000640;IPR042116;IPR006298;noIPR;noIPR;noIPR;IPR031157;IPR000795;IPR047041;IPR035651;IPR047042;IPR047043;IPR035647;IPR035647;IPR009000;IPR027417	Translational (tr)-type GTP-binding domain;Translational (tr)-type GTP-binding domain;Translational (tr)-type GTP-binding domain;Translational (tr)-type GTP-binding domain;Translational (tr)-type GTP-binding domain;Translational (tr)-type GTP-binding domain;Elongation factor EFG, domain V-like;Elongation factor EFG, domain V-like;P-loop containing nucleoside triphosphate hydrolase;P-loop containi…	GO:0000302;GO:0003729;GO:0003746;GO:0003924;GO:0005525;GO:0005829;GO:0006414;GO:0009507;GO:0010468;GO:0031425;GO:1990904	response to reactive oxygen species;mRNA binding;translation elongation factor activity;GTPase activity;GTP binding;cytosol;translational elongation;chloroplast;regulation of gene expression;chloroplast RNA processing;ribonucleoprotein complex
Dis.W6-48549-006.v1.1AG00727.t1	GJN19611.1hypothetical protein PR202_gb06905	485			IPR002528;IPR002528;noIPR;IPR045069	Multi antimicrobial extrusion protein;Multi antimicrobial extrusion protein;Multi antimicrobial extrusion protein;Multidrug and toxic compound extrusion family, eukaryotic	GO:0015297;GO:0016020;GO:0042910;GO:1990961	antiporter activity;membrane;xenobiotic transmembrane transporter activity;xenobiotic detoxification by transmembrane export across the plasma membrane
Dis.W6-48549-006.v1.1AG00728.t1	XP_039855423.1uncharacterized protein LOC120713553	755	EC:2	Transferases	IPR000477;IPR026960;noIPR;IPR000477;noIPR;IPR043502	Reverse transcriptase domain;Reverse transcriptase zinc-binding domain;Reverse transcriptase zinc-binding domain;Reverse transcriptase domain;Reverse transcriptase domain;DNA/RNA polymerase superfamily	GO:0006807;GO:0016740;GO:0043170;GO:0044238	nitrogen compound metabolic process;transferase activity;macromolecule metabolic process;primary metabolic process
Dis.W6-48549-006.v1.1AG00728.t2	TVU44600.1hypothetical protein EJB05_04045, partial	204			IPR026960;noIPR	Reverse transcriptase zinc-binding domain;Reverse transcriptase zinc-binding domain
Dis.W6-48549-006.v1.1AG00729.t1	TVU32470.1hypothetical protein EJB05_24201, partial	142			IPR002528;noIPR	Multi antimicrobial extrusion protein;Multi antimicrobial extrusion protein	GO:0022857;GO:0042908;GO:0055085	transmembrane transporter activity;xenobiotic transport;transmembrane transport
Dis.W6-48549-006.v1.1AG00730.t1	-	140			noIPR;noIPR	SCAMP;SCAMP
Dis.W6-48549-006.v1.1AG00731.t1	TVU32454.1hypothetical protein EJB05_24185, partial	533			IPR002528;IPR002528;noIPR;IPR045069	Multi antimicrobial extrusion protein;Multi antimicrobial extrusion protein;Multi antimicrobial extrusion protein;Multidrug and toxic compound extrusion family, eukaryotic	GO:0015297;GO:0016020;GO:0042910;GO:1990961	antiporter activity;membrane;xenobiotic transmembrane transporter activity;xenobiotic detoxification by transmembrane export across the plasma membrane
Dis.W6-48549-006.v1.1AG00732.t1	XP_004952271.1ubiquitin-conjugating enzyme E2 variant 1C	226			noIPR;noIPR;IPR016135;IPR000608;noIPR;noIPR;IPR000608;IPR016135	Concanavalin A-like lectin/glucanase domain superfamily;Concanavalin A-like lectin/glucanase domain superfamily;Ubiquitin-conjugating enzyme/RWD-like;Ubiquitin-conjugating enzyme E2;Ubiquitin-conjugating enzyme E2;Ubiquitin-conjugating enzyme E2;Ubiquitin-conjugating enzyme E2;Ubiquitin-conjugating enzyme/RWD-like	GO:0005634;GO:0006301	nucleus;postreplication repair
Dis.W6-48549-006.v1.1AG00733.t1	-	86
Dis.W6-48549-006.v1.1AG00734.t1	TVU32442.1hypothetical protein EJB05_24173	827			noIPR;IPR001680;IPR001680;IPR015943;noIPR;noIPR;noIPR;noIPR;noIPR;IPR019775;noIPR;IPR001680;IPR011047	Transmembrane protein TauE-like;WD40 repeat;WD40 repeat;WD40/YVTN repeat-like-containing domain superfamily;WD40/YVTN repeat-like-containing domain superfamily;WD40/YVTN repeat-like-containing domain superfamily;WD40/YVTN repeat-like-containing domain superfamily;WD40/YVTN repeat-like-containing domain superfamily;WD40/YVTN repeat-like-containing domain superfamily;WD40 repeat, conserved site;WD4…
Dis.W6-48549-006.v1.1AG00735.t1	-	103			noIPR;noIPR;noIPR	Ribonuclease T2-like superfamily;Ribonuclease T2-like superfamily;Ribonuclease T2-like superfamily
Dis.W6-48549-006.v1.1AG00736.t1	CAD6250042.1unnamed protein product	284	EC:2.1.1	Transferring one-carbon groups	noIPR;IPR005304;IPR029026;noIPR;noIPR;IPR005304;IPR005304;IPR029028	F-box-like domain superfamily;Ribosomal biogenesis, methyltransferase, EMG1/NEP1;tRNA (guanine-N1-)-methyltransferase, N-terminal;tRNA (guanine-N1-)-methyltransferase, N-terminal;tRNA (guanine-N1-)-methyltransferase, N-terminal;Ribosomal biogenesis, methyltransferase, EMG1/NEP1;Ribosomal biogenesis, methyltransferase, EMG1/NEP1;Alpha/beta knot methyltransferases	GO:0005730;GO:0019843;GO:0032040;GO:0070037;GO:0070475	nucleolus;rRNA binding;small-subunit processome;rRNA (pseudouridine) methyltransferase activity;rRNA base methylation
Dis.W6-48549-006.v1.1AG00736.t2	CAD6250042.1unnamed protein product	359	EC:2.1.1	Transferring one-carbon groups	noIPR;IPR005304;IPR029026;noIPR;noIPR;noIPR;IPR005304;IPR005304;IPR029028	Zinc finger, CCHC-type superfamily;Ribosomal biogenesis, methyltransferase, EMG1/NEP1;tRNA (guanine-N1-)-methyltransferase, N-terminal;tRNA (guanine-N1-)-methyltransferase, N-terminal;tRNA (guanine-N1-)-methyltransferase, N-terminal;tRNA (guanine-N1-)-methyltransferase, N-terminal;Ribosomal biogenesis, methyltransferase, EMG1/NEP1;Ribosomal biogenesis, methyltransferase, EMG1/NEP1;Alpha/beta knot…	GO:0005730;GO:0019843;GO:0032040;GO:0070037;GO:0070475	nucleolus;rRNA binding;small-subunit processome;rRNA (pseudouridine) methyltransferase activity;rRNA base methylation
Dis.W6-48549-006.v1.1AG00737.t1	TVU32440.1hypothetical protein EJB05_24171	760	EC:3.4.11;EC:3.4.14.1;EC:3.4.14.5;EC:3.4.14.4;EC:3.4.14.2	Acting on peptide bonds (peptidases);dipeptidyl-peptidase I;dipeptidyl-peptidase IV;dipeptidyl-peptidase III;dipeptidyl-peptidase II	noIPR;IPR029058;IPR001375;IPR002469;noIPR;noIPR;noIPR;IPR029058;noIPR	Cupredoxin;Alpha/Beta hydrolase fold;Peptidase S9, prolyl oligopeptidase, catalytic domain;Dipeptidylpeptidase IV, N-terminal domain;Dipeptidylpeptidase IV, N-terminal domain;Dipeptidylpeptidase IV, N-terminal domain;Dipeptidylpeptidase IV, N-terminal domain;Alpha/Beta hydrolase fold;Alpha/Beta hydrolase fold	GO:0004177;GO:0006508;GO:0008236;GO:0008239	aminopeptidase activity;proteolysis;serine-type peptidase activity;dipeptidyl-peptidase activity
Dis.W6-48549-006.v1.1AG00737.t2	GJM90912.1hypothetical protein PR202_ga07237	183	EC:3.4.11	Acting on peptide bonds (peptidases)	IPR001375;IPR029058;noIPR;noIPR;IPR029058	Peptidase S9, prolyl oligopeptidase, catalytic domain;Alpha/Beta hydrolase fold;Alpha/Beta hydrolase fold;Alpha/Beta hydrolase fold;Alpha/Beta hydrolase fold	GO:0004177;GO:0006508;GO:0008236	aminopeptidase activity;proteolysis;serine-type peptidase activity
Dis.W6-48549-006.v1.1AG00738.t1	-	126			noIPR;noIPR;noIPR;noIPR	Retrotransposon gag domain;Retrotransposon gag domain;Retrotransposon gag domain;Retrotransposon gag domain
Dis.W6-48549-006.v1.1AG00739.t1	TVU32435.1hypothetical protein EJB05_24166, partial	72
Dis.W6-48549-006.v1.1AG00740.t1	-	130			noIPR;noIPR	P-loop containing nucleoside triphosphate hydrolase;P-loop containing nucleoside triphosphate hydrolase
Dis.W6-48549-006.v1.1AG00740.t2	AAM08751.1Putative copia-type polyprotein	243			IPR013103;noIPR;noIPR	Reverse transcriptase, RNA-dependent DNA polymerase;Reverse transcriptase, RNA-dependent DNA polymerase;Reverse transcriptase, RNA-dependent DNA polymerase	GO:0003676	nucleic acid binding
Dis.W6-48549-006.v1.1AG00741.t1	TVU32445.1hypothetical protein EJB05_24176, partial	254			IPR001087;IPR036514;noIPR	GDSL lipase/esterase;SGNH hydrolase superfamily;SGNH hydrolase superfamily
Dis.W6-48549-006.v1.1AG00742.t1	-	69
Dis.W6-48549-006.v1.1AG00743.t1	GJM90915.1hypothetical protein PR202_ga07241	213			noIPR;noIPR;IPR002048;IPR002048;noIPR;IPR002048;IPR045198;IPR018247;IPR002048;IPR002048;IPR002048;IPR002048;IPR011992	DNA/RNA polymerase superfamily;DNA/RNA polymerase superfamily;EF-hand domain;EF-hand domain;EF-hand domain;EF-hand domain;Calcineurin B-like;EF-Hand 1, calcium-binding site;EF-hand domain;EF-hand domain;EF-hand domain;EF-hand domain;EF-hand domain pair	GO:0005509;GO:0005886;GO:0019722;GO:0019900	calcium ion binding;plasma membrane;calcium-mediated signaling;kinase binding
Dis.W6-48549-006.v1.1AG00744.t1	TVU32431.1hypothetical protein EJB05_24162	214			noIPR;noIPR;IPR002048;noIPR;IPR002048;IPR002048;IPR045198;IPR018247;IPR002048;IPR002048;IPR002048;IPR002048;IPR011992	Zinc finger C2H2 superfamily;Zinc finger C2H2 superfamily;EF-hand domain;EF-hand domain;EF-hand domain;EF-hand domain;Calcineurin B-like;EF-Hand 1, calcium-binding site;EF-hand domain;EF-hand domain;EF-hand domain;EF-hand domain;EF-hand domain pair	GO:0005509;GO:0005886;GO:0019722;GO:0019900	calcium ion binding;plasma membrane;calcium-mediated signaling;kinase binding
Dis.W6-48549-006.v1.1AG00744.t2	TVU32431.1hypothetical protein EJB05_24162	223			noIPR;noIPR;IPR002048;IPR002048;IPR002048;noIPR;IPR045198;IPR018247;IPR002048;IPR002048;IPR002048;IPR002048;IPR011992	Ankyrin repeat-containing domain superfamily;Ankyrin repeat-containing domain superfamily;EF-hand domain;EF-hand domain;EF-hand domain;EF-hand domain;Calcineurin B-like;EF-Hand 1, calcium-binding site;EF-hand domain;EF-hand domain;EF-hand domain;EF-hand domain;EF-hand domain pair	GO:0005509;GO:0005886;GO:0019722;GO:0019900	calcium ion binding;plasma membrane;calcium-mediated signaling;kinase binding
Dis.W6-48549-006.v1.1AG00744.t3	GJN19598.1hypothetical protein PR202_gb06889	121			noIPR;IPR045198;IPR002048;IPR011992	SAP domain superfamily;Calcineurin B-like;EF-hand domain;EF-hand domain pair	GO:0005509;GO:0016020;GO:0019722;GO:0019900	calcium ion binding;membrane;calcium-mediated signaling;kinase binding
Dis.W6-48549-006.v1.1AG00745.t1	GJM90917.1hypothetical protein PR202_ga07243	396			noIPR;IPR040320	Mitochondrial carrier domain superfamily;Uncharacterized protein At4g37920-like	GO:0016020	membrane
Dis.W6-48549-006.v1.1AG00746.t1	KAH9681297.1hypothetical protein KPL71_026922	540			IPR001878;IPR036514;noIPR;noIPR;IPR001878;noIPR;IPR001878;IPR036875	Zinc finger, CCHC-type;SGNH hydrolase superfamily;SGNH hydrolase superfamily;SGNH hydrolase superfamily;Zinc finger, CCHC-type;Zinc finger, CCHC-type;Zinc finger, CCHC-type;Zinc finger, CCHC-type superfamily	GO:0005488	binding
Dis.W6-48549-006.v1.1AG00747.t1	TVU23222.1hypothetical protein EJB05_30189, partial	263	EC:3.1	Acting on ester bonds	IPR001087;IPR036514;noIPR	GDSL lipase/esterase;SGNH hydrolase superfamily;SGNH hydrolase superfamily	GO:0016788	hydrolase activity, acting on ester bonds
Dis.W6-48549-006.v1.1AG00747.t2	TVU23222.1hypothetical protein EJB05_30189, partial	243	EC:3.1	Acting on ester bonds	IPR036514;IPR001087;noIPR	SGNH hydrolase superfamily;GDSL lipase/esterase;GDSL lipase/esterase	GO:0016788	hydrolase activity, acting on ester bonds
Dis.W6-48549-006.v1.1AG00748.t1	TVU32417.1hypothetical protein EJB05_24148, partial	462	EC:6;EC:2.3.2	Ligases;Acyltransferases	noIPR;noIPR;IPR008974;IPR013083;IPR018121;IPR013083;noIPR;noIPR;IPR013010;IPR001841;noIPR;noIPR;noIPR;noIPR	P-loop containing nucleoside triphosphate hydrolase;P-loop containing nucleoside triphosphate hydrolase;TRAF-like;Zinc finger, RING/FYVE/PHD-type;Seven-in-absentia protein, TRAF-like domain;Zinc finger, RING/FYVE/PHD-type;Zinc finger, RING/FYVE/PHD-type;Zinc finger, RING/FYVE/PHD-type;Zinc finger, SIAH-type;Zinc finger, RING-type;Zinc finger, RING-type;Zinc finger, RING-type;Zinc finger, RING-typ…	GO:0005737;GO:0006511;GO:0008270;GO:0016567;GO:0016874;GO:0061630	cytoplasm;ubiquitin-dependent protein catabolic process;zinc ion binding;protein ubiquitination;ligase activity;ubiquitin protein ligase activity
Dis.W6-48549-006.v1.1AG00749.t1	GJN19617.1hypothetical protein PR202_gb06912	717			noIPR;IPR018610;noIPR;IPR018610;IPR008942	Aspartic peptidase domain superfamily;UV-stimulated scaffold protein A;UV-stimulated scaffold protein A;UV-stimulated scaffold protein A;ENTH/VHS	GO:0000993;GO:0005694;GO:0006283;GO:0009411	RNA polymerase II complex binding;chromosome;transcription-coupled nucleotide-excision repair;response to UV
Dis.W6-48549-006.v1.1AG00750.t1	RLM98961.1zinc finger protein ZAT3-like	161			IPR013087;noIPR;noIPR;noIPR;noIPR;noIPR;noIPR;IPR013087;IPR013087;IPR036236	Zinc finger C2H2-type;Zinc finger C2H2-type;Zinc finger C2H2-type;Zinc finger C2H2-type;Zinc finger C2H2-type;Zinc finger C2H2-type;Zinc finger C2H2-type;Zinc finger C2H2-type;Zinc finger C2H2-type;Zinc finger C2H2 superfamily
Dis.W6-48549-006.v1.1AG00751.t1	TVU00145.1hypothetical protein EJB05_54455, partial	159			noIPR;noIPR;IPR036047	Chaperone J-domain superfamily;Chaperone J-domain superfamily;F-box-like domain superfamily
Dis.W6-48549-006.v1.1AG00752.t1	GJM90944.1hypothetical protein PR202_ga07271	520			noIPR;noIPR;noIPR;noIPR;noIPR;IPR039900	MATH/TRAF domain;MATH/TRAF domain;MATH/TRAF domain;MATH/TRAF domain;MATH/TRAF domain;Pat1-like
Dis.W6-48549-006.v1.1AG00752.t2	GJM90944.1hypothetical protein PR202_ga07271	472			noIPR;noIPR;noIPR;noIPR;noIPR;IPR039900	Pectin lyase fold/virulence factor;Pectin lyase fold/virulence factor;Pectin lyase fold/virulence factor;Pectin lyase fold/virulence factor;Pectin lyase fold/virulence factor;Pat1-like
Dis.W6-48549-006.v1.1AG00753.t1	TVU02725.1hypothetical protein EJB05_51757, partial	321	EC:3.1.15;EC:3.1.13.4	Acting on ester bonds;poly(A)-specific ribonuclease	noIPR;IPR006941;IPR036397;IPR006941;IPR039637;IPR012337	JAB1/MPN/MOV34 metalloenzyme domain;Ribonuclease CAF1;Ribonuclease H superfamily;Ribonuclease CAF1;CCR4-NOT transcription complex subunit 7/8/Pop2;Ribonuclease H-like superfamily	GO:0000932;GO:0003676;GO:0004535;GO:0005634;GO:0030015;GO:0043928	P-body;nucleic acid binding;poly(A)-specific ribonuclease activity;nucleus;CCR4-NOT core complex;exonucleolytic catabolism of deadenylated mRNA
Dis.W6-48549-006.v1.1AG00754.t1	GJM90950.1hypothetical protein PR202_ga07277	176
Dis.W6-48549-006.v1.1AG00755.t1	GJM90948.1hypothetical protein PR202_ga07275	455			noIPR;noIPR;noIPR;IPR036047	PRP4-like superfamily;PRP4-like superfamily;PRP4-like superfamily;F-box-like domain superfamily
Dis.W6-48549-006.v1.1AG00756.t1	TVU00155.1hypothetical protein EJB05_54466	316			noIPR;noIPR	GOLD domain;GOLD domain
Dis.W6-48549-006.v1.1AG00757.t1	TVU00156.1hypothetical protein EJB05_54467	207	EC:4.98.1.1;EC:4.99.1.4	protoporphyrin ferrochelatase;sirohydrochlorin ferrochelatase	noIPR;IPR002762;noIPR;noIPR;noIPR;noIPR;noIPR	Mediator complex, subunit Med18;Sirohydrochlorin cobaltochelatase CbiX-like;Sirohydrochlorin cobaltochelatase CbiX-like;Sirohydrochlorin cobaltochelatase CbiX-like;Sirohydrochlorin cobaltochelatase CbiX-like;Sirohydrochlorin cobaltochelatase CbiX-like;Sirohydrochlorin cobaltochelatase CbiX-like	GO:0006979;GO:0009507;GO:0019354;GO:0042802;GO:0046872;GO:0051266;GO:0051536	response to oxidative stress;chloroplast;siroheme biosynthetic process;identical protein binding;metal ion binding;sirohydrochlorin ferrochelatase activity;iron-sulfur cluster binding
Dis.W6-48549-006.v1.1AG00757.t2	TVU00156.1hypothetical protein EJB05_54467	220	EC:4.98.1.1;EC:4.99.1.4	protoporphyrin ferrochelatase;sirohydrochlorin ferrochelatase	IPR002762;noIPR;noIPR;noIPR;noIPR;noIPR;noIPR	Sirohydrochlorin cobaltochelatase CbiX-like;Sirohydrochlorin cobaltochelatase CbiX-like;Sirohydrochlorin cobaltochelatase CbiX-like;Sirohydrochlorin cobaltochelatase CbiX-like;Sirohydrochlorin cobaltochelatase CbiX-like;Sirohydrochlorin cobaltochelatase CbiX-like;Sirohydrochlorin cobaltochelatase CbiX-like	GO:0006979;GO:0009507;GO:0019354;GO:0042802;GO:0046872;GO:0051266;GO:0051536	response to oxidative stress;chloroplast;siroheme biosynthetic process;identical protein binding;metal ion binding;sirohydrochlorin ferrochelatase activity;iron-sulfur cluster binding
Dis.W6-48549-006.v1.1AG00758.t1	-	113			noIPR	S-adenosyl-L-methionine-dependent methyltransferase superfamily
Dis.W6-48549-006.v1.1AG00759.t1	XP_025809699.1uncharacterized protein LOC112887663 isoform X2	370			IPR007877;IPR007877	Protein of unknown function DUF707;Protein of unknown function DUF707	GO:0016020	membrane
Dis.W6-48549-006.v1.1AG00759.t2	XP_025809691.1uncharacterized protein LOC112887663 isoform X1	401			IPR007877;IPR007877	Protein of unknown function DUF707;Protein of unknown function DUF707	GO:0016020	membrane
Dis.W6-48549-006.v1.1AG00760.t1	TVU32394.1hypothetical protein EJB05_24124	502	EC:3	Hydrolases	IPR000639;IPR029058;IPR000073;IPR009653;noIPR;IPR029058	Epoxide hydrolase-like;Alpha/Beta hydrolase fold;Alpha/beta hydrolase fold-1;Protein kish;Protein kish;Alpha/Beta hydrolase fold	GO:0016020;GO:0016787	membrane;hydrolase activity
[truncated: 66,139 more rows]

## Sheet: W6-54757-002_v1
Sequence Name	Sequence Description	Sequence Length	Enzyme Code	Enzyme Name	InterPro Accession	InterPro Name	Annotation GO ID	Annotation GO Term
Dis.W6-54757-002.v1.1AG00001.t1	BAF23632.1Os08g0389500	254			IPR036397;IPR001584;noIPR;IPR001584;IPR012337	Ribonuclease H superfamily;Integrase, catalytic core;Integrase, catalytic core;Integrase, catalytic core;Ribonuclease H-like superfamily
[truncated: 66,945 more rows]

## Sheet: 2021-KS-Q6_v1
Sequence Name	Sequence Description	Sequence Length	Enzyme Code	Enzyme Name	InterPro Accession	InterPro Name	Annotation GO ID	Annotation GO Term
[truncated: 63,604 more rows]

## Sheet: W6-48045-006_v1
Sequence Name	Sequence Description	Sequence Length	Enzyme Code	Enzyme Name	InterPro Accession	InterPro Name	Annotation GO ID	Annotation GO Term
[truncated: 63,870 more rows]
